# Supplementary material for: Topology of metallacalix[4]arenes with uracil and cytosine ligands: favorable and unfavorable assemblies
Source: Royal Society of Chemistry journal article supplement (doi:10.1039/c6nj00772d), 2016-01-01
Supplement: c6nj00772d1.pdf [file c6nj00772d1.pdf]

## SUPPORTING INFORMATION

### **Topology of Metallacalix[4]arenes with Uracil and Cytosine Ligands: Favorable and Unfavorable Assemblies**

Alba Vellé,<sup>a</sup> Andrea Cebollada,<sup>a</sup> Bernhard Lippert<sup>b</sup> and Pablo J. Sanz Miguel\*<sup>a</sup>

<sup>a</sup> *Departamento de Química Inorgánica, Instituto de Síntesis Química y Catálisis Homogénea (ISQCH), Universidad de Zaragoza-CSIC, 50009 Zaragoza, Spain. Email: pablo.sanz@unizar.es*

<sup>b</sup> *Fakultät Chemie und Chemische Biologie (CCB), Technische Universität Dortmund, Otto-Hahn-Strasse 6, 44221 Dortmund, Germany.*

Supporting Information content:

- Figures
- Molecular coordinates

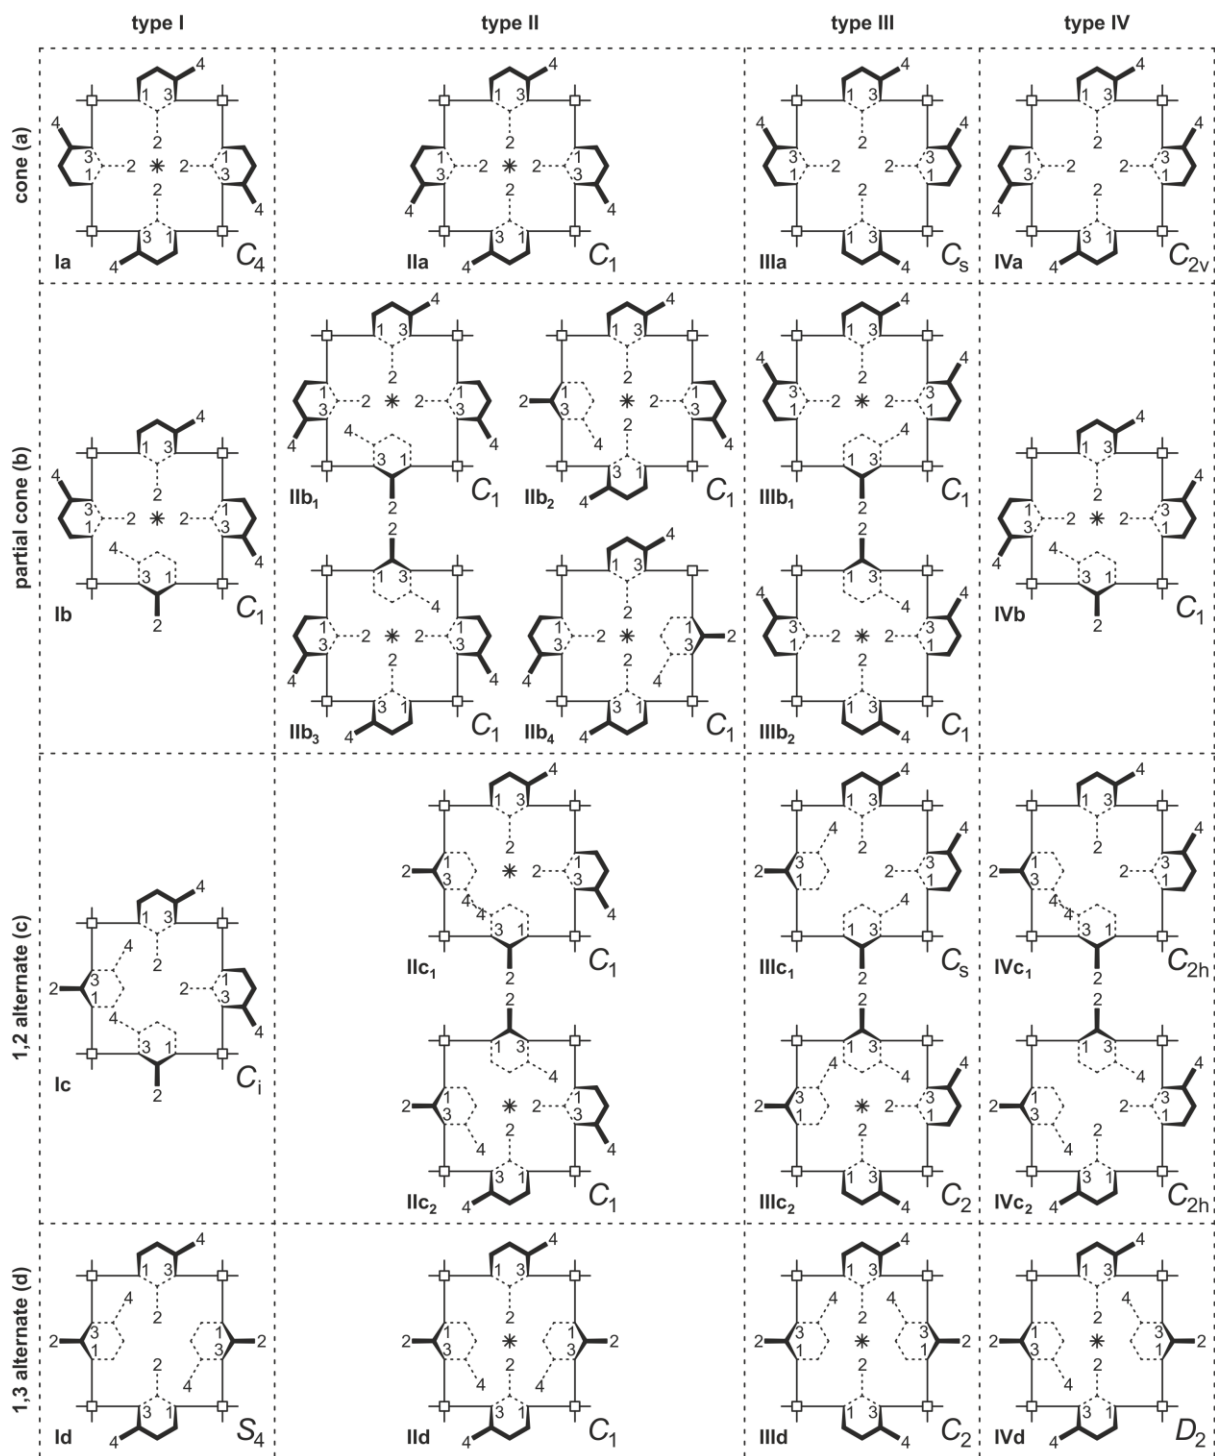

Figure S11. Resume of the possible metallacalix[4]arene isomers.<sup>S1</sup> Exocyclic (2 or 4) sites inside the molecular square point down; while outside placed sites point up (an inverse criterion is likewise valid: inside, up; outside, down). Asterisks in the center of the molecular square denote chirality. Bottom left: isomer numbering (**Ia** to **IVd**). Bottom right: highest symmetric point group.

#### Reference

S1 Adapted from: B. Lippert and P. J. Sanz Miguel, *Chem. Soc. Rev.*, 2011, **40**, 4475–4487.

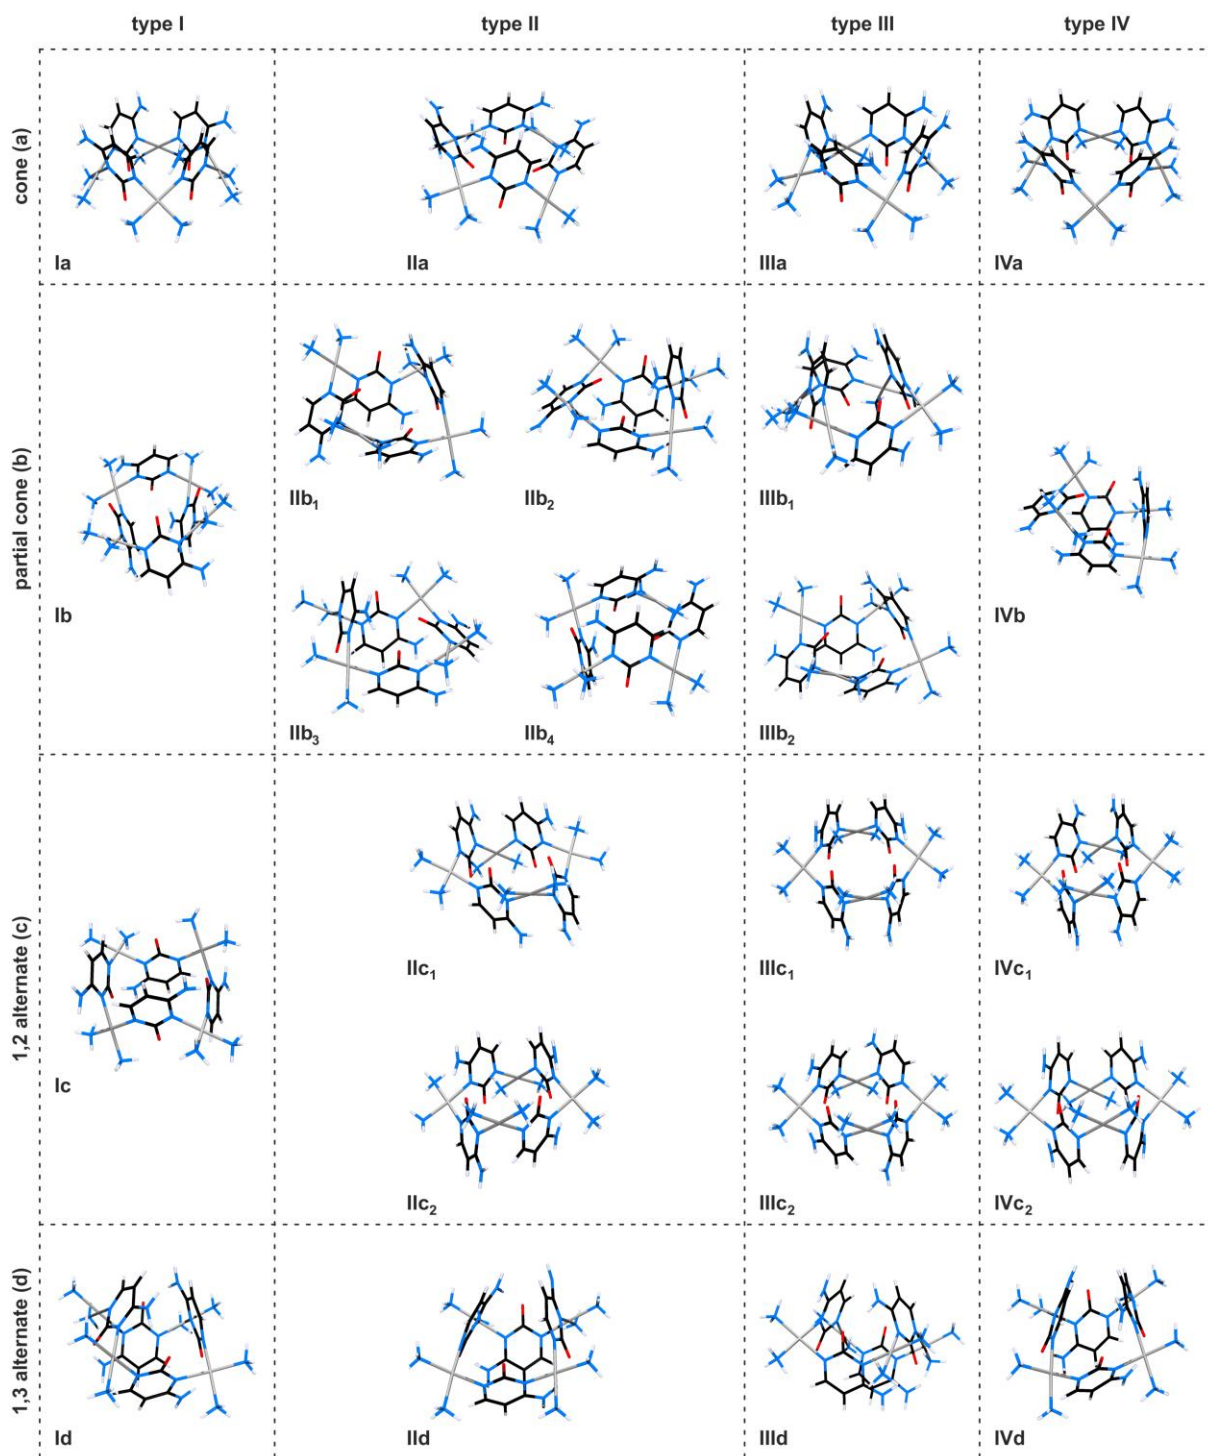

Figure SI2. View of the optimized *cis*-[Pt(NH<sub>3</sub>)<sub>2</sub>(cytosinate)]<sub>4</sub><sup>4+</sup> isomers.

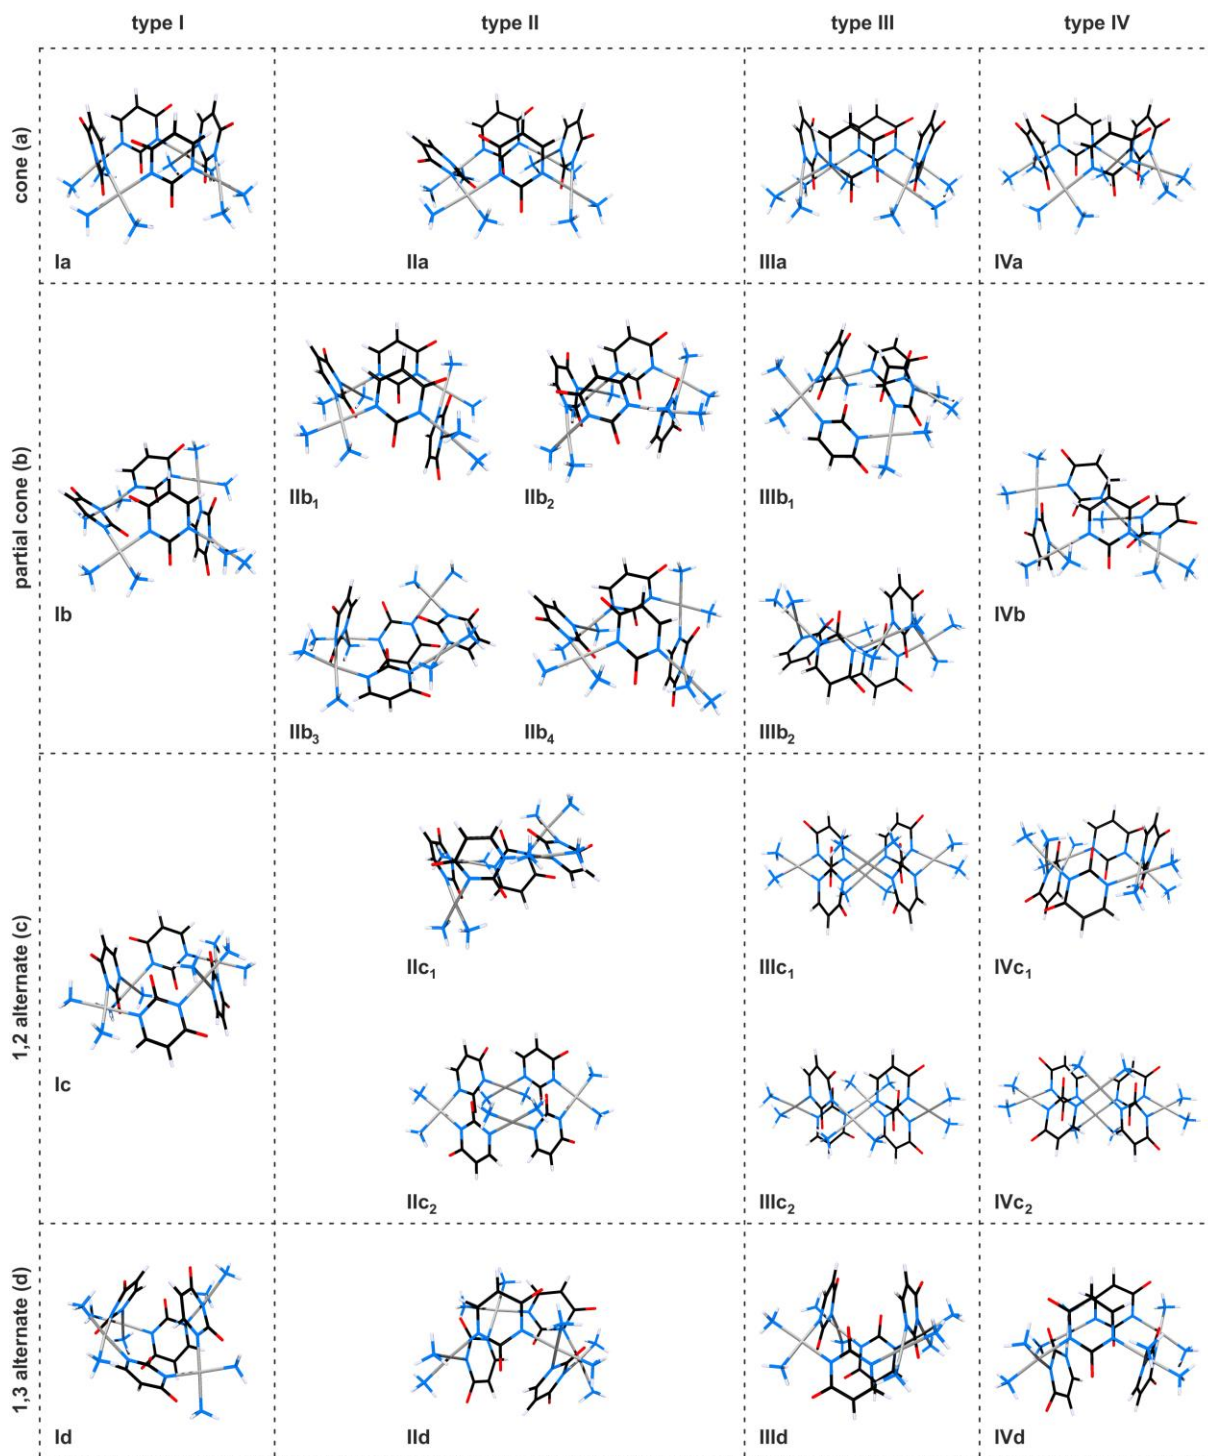

Figure SI3. View of the optimized *cis*-[Pt(NH<sub>3</sub>)<sub>2</sub>(uracilate)]<sub>4</sub> isomers.

## Abbreviations

C = cytosine; U = uracil; N1N1, N1N3, N3N3 = binding sites; hh = head-head conformation; ht = head-tail conformation.

## COORDINATES

| <b>Pt–C–N1N1–hh (M11L, SMD water)</b> |           |           |           |
|---------------------------------------|-----------|-----------|-----------|
| Pt                                    | –0.001986 | –1.119458 | –0.256266 |
| C                                     | –2.663008 | 2.154020  | –1.027428 |
| C                                     | –1.673822 | 1.214625  | –1.106945 |
| H                                     | –2.795683 | 2.903158  | –1.801381 |
| H                                     | –0.999464 | 1.188393  | –1.960905 |
| N                                     | –1.486002 | 0.272183  | –0.164068 |
| N                                     | –3.348169 | 1.145375  | 1.045381  |
| C                                     | 2.735527  | 2.077662  | –1.058510 |
| H                                     | 2.917848  | 2.783333  | –1.861994 |
| N                                     | 3.311975  | 1.161892  | 1.090342  |
| N                                     | 1.492638  | 0.257582  | –0.158709 |
| C                                     | 1.736117  | 1.149258  | –1.137335 |
| H                                     | 1.101228  | 1.085798  | –2.019542 |
| C                                     | –3.498864 | 2.091120  | 0.105547  |
| C                                     | 3.516721  | 2.060197  | 0.114552  |
| C                                     | –2.355081 | 0.237597  | 0.909341  |
| O                                     | –2.203236 | –0.682061 | 1.778068  |
| C                                     | 2.316576  | 0.257185  | 0.949878  |
| O                                     | 2.122090  | –0.630360 | 1.842447  |
| H                                     | 1.177856  | –3.492404 | –0.185173 |
| H                                     | 2.041783  | –2.483893 | –1.155315 |
| H                                     | 2.112190  | –2.305272 | 0.492014  |
| H                                     | –1.191067 | –3.489991 | –0.230980 |
| H                                     | –2.117891 | –2.305748 | 0.469242  |
| H                                     | –2.048628 | –2.459029 | –1.182178 |
| N                                     | –1.510615 | –2.528191 | –0.321726 |
| N                                     | 1.502034  | –2.533954 | –0.294421 |
| N                                     | –4.484549 | 2.971029  | 0.286810  |
| N                                     | 4.505245  | 2.936532  | 0.298871  |
| H                                     | –4.649921 | 3.710661  | –0.372036 |
| H                                     | –5.066955 | 2.907820  | 1.103236  |
| H                                     | 4.710939  | 3.641720  | –0.385823 |
| H                                     | 5.048939  | 2.905402  | 1.143525  |

| <b>Pt–C–N1N1–ht (M11L, SMD water)</b> |           |           |           |
|---------------------------------------|-----------|-----------|-----------|
| Pt                                    | 0.000015  | 1.217698  | –0.000032 |
| C                                     | –2.153199 | –2.217488 | –1.257419 |
| C                                     | –1.258115 | –1.196339 | –1.113950 |
| H                                     | –2.023354 | –2.984345 | –2.014380 |
| H                                     | –0.378230 | –1.117089 | –1.752903 |
| N                                     | –1.403393 | –0.231382 | –0.184674 |
| N                                     | –3.400101 | –1.281007 | 0.577347  |
| C                                     | 2.152146  | –2.218661 | 1.256273  |
| H                                     | 2.021459  | –2.986187 | 2.012406  |
| N                                     | 3.400686  | –1.280751 | –0.576598 |
| N                                     | 1.403054  | –0.231909 | 0.184124  |
| C                                     | 1.257028  | –1.197555 | 1.112572  |
| H                                     | 0.376438  | –1.119002 | 1.750657  |
| C                                     | –3.244615 | –2.225256 | –0.363580 |
| C                                     | 3.244546  | –2.225577 | 0.363674  |
| C                                     | –2.485476 | –0.288100 | 0.667137  |

|   |           |           |           |
|---|-----------|-----------|-----------|
| O | –2.611284 | 0.625785  | 1.546890  |
| C | 2.485991  | –0.288041 | –0.666741 |
| O | 2.612165  | 0.626011  | –1.546281 |
| H | 1.202130  | 3.573264  | –0.163008 |
| H | 1.848573  | 2.721248  | 1.086584  |
| H | 2.232446  | 2.306847  | –0.476076 |
| H | –1.201200 | 3.572885  | 0.164680  |
| H | –1.848242 | 2.722531  | –1.085805 |
| H | –2.232568 | 2.306874  | 0.476251  |
| N | –1.487492 | 2.644122  | –0.137793 |
| N | 1.487675  | 2.643960  | 0.138510  |
| N | –4.174316 | –3.180207 | –0.416671 |
| N | 4.174525  | –3.180209 | 0.417266  |
| H | –4.126266 | –3.918382 | –1.095679 |
| H | –4.939895 | –3.165445 | 0.233896  |
| H | 4.125653  | –3.919117 | 1.095419  |
| H | 4.940509  | –3.165150 | –0.232816 |

| <b>Pt–C–N1N3–hh (M11L, SMD water)</b> |           |           |           |
|---------------------------------------|-----------|-----------|-----------|
| Pt                                    | –0.483509 | –1.007741 | –0.091526 |
| C                                     | –2.481387 | 3.209998  | 0.615759  |
| C                                     | –2.627471 | 2.676990  | –0.642779 |
| H                                     | –2.903448 | 4.190068  | 0.840092  |
| C                                     | 1.485670  | 0.959038  | –1.087215 |
| H                                     | 0.638745  | 1.205059  | –1.728276 |
| C                                     | 2.664266  | 1.644016  | –1.176547 |
| H                                     | 2.795443  | 2.458213  | –1.881173 |
| H                                     | –3.151221 | 3.195081  | –1.439496 |
| N                                     | 3.526956  | 0.233606  | 0.573411  |
| N                                     | 1.302124  | –0.057807 | –0.223285 |
| N                                     | –1.842875 | 2.611973  | 1.630271  |
| N                                     | –1.400863 | 0.794174  | 0.140618  |
| C                                     | 3.694389  | 1.235879  | –0.303529 |
| C                                     | –2.047455 | 1.421802  | –0.865410 |
| C                                     | 2.336350  | –0.406328 | 0.618819  |
| O                                     | 2.149736  | –1.357010 | 1.446953  |
| C                                     | –1.305793 | 1.386607  | 1.383172  |
| O                                     | –0.699089 | 0.752072  | 2.301860  |
| N                                     | –2.313309 | –1.960877 | 0.030121  |
| H                                     | –2.324678 | –2.636138 | 0.792616  |
| H                                     | –3.062807 | –1.292372 | 0.200489  |
| N                                     | 0.486471  | –2.821279 | –0.286920 |
| H                                     | –0.085605 | –3.625044 | –0.036359 |
| H                                     | 0.831686  | –2.965376 | –1.232512 |
| H                                     | –2.532904 | –2.461063 | –0.829297 |
| H                                     | 1.279813  | –2.758131 | 0.356249  |
| N                                     | 4.887825  | 1.831491  | –0.313657 |
| N                                     | –2.101054 | 0.809192  | –2.051299 |
| H                                     | 5.605550  | 1.518310  | 0.316201  |
| H                                     | 5.087197  | 2.592054  | –0.938304 |
| H                                     | –1.633905 | –0.074060 | –2.190138 |
| H                                     | –2.563684 | 1.245385  | –2.830031 |

| <b>Pt-C-N1N3-ht (M11L, SMD water)</b> |           |           |           |
|---------------------------------------|-----------|-----------|-----------|
| Pt                                    | 0.566528  | -0.996825 | -0.045818 |
| C                                     | 2.244991  | 3.406197  | 0.215039  |
| C                                     | 1.361998  | 3.027337  | 1.196050  |
| H                                     | 2.627681  | 4.426664  | 0.195712  |
| C                                     | -1.483891 | 0.769021  | -1.219986 |
| H                                     | -0.635816 | 1.011330  | -1.861373 |
| C                                     | -2.692560 | 1.388200  | -1.367991 |
| H                                     | -2.853822 | 2.143233  | -2.130552 |
| H                                     | 1.027572  | 3.706059  | 1.973368  |
| N                                     | -3.513542 | 0.066785  | 0.472030  |
| N                                     | -1.269095 | -0.175093 | -0.284056 |
| N                                     | 2.701549  | 2.600335  | -0.756029 |
| N                                     | 1.328513  | 0.876906  | 0.176416  |
| C                                     | -3.714379 | 0.995100  | -0.477679 |
| C                                     | 0.904246  | 1.701984  | 1.160151  |
| C                                     | -2.294620 | -0.507331 | 0.572700  |
| O                                     | -2.056697 | -1.372383 | 1.479468  |
| C                                     | 2.232405  | 1.325531  | -0.763689 |
| O                                     | 2.625852  | 0.497383  | -1.648750 |
| N                                     | 2.472559  | -1.765872 | 0.141220  |
| H                                     | 2.558413  | -2.736216 | -0.153054 |
| H                                     | 3.050486  | -1.183485 | -0.468668 |
| N                                     | -0.284819 | -2.868725 | -0.232693 |
| H                                     | 0.328933  | -3.635083 | 0.035122  |
| H                                     | -1.091689 | -2.852691 | 0.395315  |
| H                                     | 2.822307  | -1.696671 | 1.094026  |
| H                                     | -0.607601 | -3.043611 | -1.181575 |
| N                                     | -4.930859 | 1.537135  | -0.539239 |
| N                                     | 0.069796  | 1.216574  | 2.080818  |
| H                                     | -5.642543 | 1.237883  | 0.104206  |
| H                                     | -5.154289 | 2.243078  | -1.217580 |
| H                                     | -0.268434 | 0.266332  | 2.031523  |
| H                                     | -0.271454 | 1.812972  | 2.814740  |

| <b>Pt-C-N3N3-hh (M11L, SMD water)</b> |           |           |           |
|---------------------------------------|-----------|-----------|-----------|
| Pt                                    | -0.024214 | -1.009557 | 0.034043  |
| C                                     | 3.382376  | 1.577477  | 0.431345  |
| C                                     | 3.247833  | 2.315448  | -0.721314 |
| H                                     | 4.174808  | 1.756941  | 1.150026  |
| H                                     | 3.951212  | 3.120916  | -0.934141 |
| N                                     | 2.295526  | 2.123489  | -1.641303 |
| N                                     | 1.450440  | 0.366448  | -0.254608 |
| C                                     | -2.331279 | 2.450930  | 1.195997  |
| H                                     | -2.301454 | 3.231556  | 1.948413  |
| N                                     | -1.423451 | 0.462161  | 0.250866  |
| N                                     | -3.367827 | 1.459212  | -0.730693 |
| C                                     | -3.283661 | 2.411876  | 0.208414  |
| H                                     | -4.045271 | 3.190330  | 0.158049  |
| C                                     | -1.376365 | 1.422075  | 1.199799  |
| C                                     | 2.432112  | 0.574202  | 0.648828  |
| C                                     | -2.430027 | 0.478320  | -0.696744 |
| O                                     | -2.459876 | -0.468950 | -1.547492 |
| C                                     | 1.399556  | 1.124708  | -1.408652 |
| O                                     | 0.492699  | 0.864015  | -2.255526 |
| H                                     | -2.242001 | -2.141092 | -0.380885 |
| H                                     | -1.256743 | -3.351940 | 0.193146  |
| H                                     | -1.949132 | -2.293831 | 1.244805  |
| H                                     | 2.282218  | -2.175659 | -0.437749 |

|   |           |           |           |
|---|-----------|-----------|-----------|
| H | 1.392385  | -3.166112 | 0.529246  |
| H | 1.074248  | -3.081568 | -1.081861 |
| N | -1.537218 | -2.382046 | 0.318596  |
| N | 1.343023  | -2.531683 | -0.266461 |
| N | 2.446032  | -0.184978 | 1.751401  |
| N | -0.426949 | 1.359146  | 2.133887  |
| H | -0.373930 | 2.068901  | 2.843519  |
| H | 0.244776  | 0.609659  | 2.154810  |
| H | 3.173930  | -0.064369 | 2.435038  |
| H | 1.800775  | -0.951279 | 1.868547  |

| <b>Pt-C-N3N3-ht (M11L, SMD water)</b> |           |           |           |
|---------------------------------------|-----------|-----------|-----------|
| Pt                                    | 0.002109  | 0.966766  | -0.012906 |
| C                                     | -2.723494 | -2.011120 | 1.395783  |
| C                                     | -3.580211 | -2.064217 | 0.324431  |
| H                                     | -2.883360 | -2.591483 | 2.298039  |
| H                                     | -4.467132 | -2.696621 | 0.372619  |
| N                                     | -3.414276 | -1.390955 | -0.826374 |
| N                                     | -1.453193 | -0.438956 | 0.148938  |
| C                                     | 2.708214  | -2.072564 | -1.338711 |
| H                                     | 2.863042  | -2.686266 | -2.219455 |
| N                                     | 1.447999  | -0.450860 | -0.147052 |
| N                                     | 3.410015  | -1.371836 | 0.856209  |
| C                                     | 3.568762  | -2.088666 | -0.269193 |
| H                                     | 4.453364  | -2.725581 | -0.297299 |
| C                                     | 1.601546  | -1.213031 | -1.253323 |
| C                                     | -1.612547 | -1.160780 | 1.281263  |
| C                                     | 2.319991  | -0.568391 | 0.910444  |
| O                                     | 2.059955  | 0.117197  | 1.956734  |
| C                                     | -2.321341 | -0.593438 | -0.907143 |
| O                                     | -2.054498 | 0.048473  | -1.978799 |
| H                                     | 1.884994  | 2.453650  | -1.056450 |
| H                                     | 1.214194  | 3.311627  | 0.174804  |
| H                                     | 2.259508  | 2.085974  | 0.507527  |
| H                                     | -1.971267 | 2.357600  | 0.976889  |
| H                                     | -1.143320 | 3.354131  | -0.033831 |
| H                                     | -2.163389 | 2.221097  | -0.653211 |
| N                                     | 1.506618  | 2.379688  | -0.114156 |
| N                                     | -1.483253 | 2.401350  | 0.084309  |
| N                                     | -0.707992 | -1.023680 | 2.250078  |
| N                                     | 0.695297  | -1.104125 | -2.223675 |
| H                                     | 0.792860  | -1.660932 | -3.055546 |
| H                                     | -0.133493 | -0.524445 | -2.124385 |
| H                                     | -0.813293 | -1.548722 | 3.101607  |
| H                                     | 0.125136  | -0.454288 | 2.132673  |

| <b>Pt-U-N1N1-hh (M11L, SMD water)</b> |           |           |           |
|---------------------------------------|-----------|-----------|-----------|
| Pt                                    | 0.065681  | -1.235520 | -0.139804 |
| C                                     | -3.303515 | 1.188313  | -1.073293 |
| C                                     | -2.321478 | 0.243320  | -1.088178 |
| H                                     | -3.942330 | 1.348220  | -1.936391 |
| H                                     | -2.132719 | -0.379067 | -1.964903 |
| N                                     | -1.519032 | 0.016396  | -0.025984 |
| N                                     | -2.657964 | 1.730624  | 1.177297  |
| C                                     | 1.817409  | 2.506946  | -1.151435 |
| H                                     | 1.590744  | 3.305618  | -1.851308 |
| N                                     | 3.173421  | 1.586137  | 0.603083  |
| N                                     | 1.296491  | 0.374364  | -0.231073 |
| C                                     | 1.039033  | 1.390139  | -1.085098 |

|   |           |           |           |
|---|-----------|-----------|-----------|
| H | 0.168823  | 1.260967  | -1.730101 |
| C | -3.469994 | 1.974332  | 0.109077  |
| O | -4.360526 | 2.889444  | 0.188528  |
| C | 2.941019  | 2.605130  | -0.276002 |
| O | 3.728596  | 3.612408  | -0.294078 |
| C | -1.714204 | 0.769354  | 1.113660  |
| O | -0.974396 | 0.514519  | 2.128326  |
| C | 2.367864  | 0.508775  | 0.627495  |
| O | 2.585519  | -0.445859 | 1.460874  |
| H | 1.537331  | -3.432061 | 0.070158  |
| H | 2.114421  | -2.525433 | -1.175306 |
| H | 2.386060  | -2.034612 | 0.396545  |
| H | -0.815860 | -3.691303 | -0.513241 |
| H | -1.461336 | -3.093172 | 0.876098  |
| H | -2.083796 | -2.646137 | -0.578197 |
| N | -1.218391 | -2.859405 | -0.085206 |
| N | 1.717646  | -2.480171 | -0.240291 |

**Pt-U-N1N1-ht (M11L, SMD water)**

|    |           |           |           |
|----|-----------|-----------|-----------|
| Pt | 0.000045  | 1.174571  | -0.000022 |
| C  | -2.156671 | -2.267845 | -1.229923 |
| C  | -1.253772 | -1.257179 | -1.090224 |
| H  | -2.013966 | -3.048845 | -1.971406 |
| H  | -0.357106 | -1.195176 | -1.709820 |
| N  | -1.407012 | -0.268341 | -0.180998 |
| N  | -3.429528 | -1.289678 | 0.557134  |
| C  | 2.156164  | -2.268332 | 1.229519  |
| H  | 2.013238  | -3.049440 | 1.970844  |
| N  | 3.429600  | -1.289818 | -0.556936 |
| N  | 1.406997  | -0.268454 | 0.180940  |
| C  | 1.253422  | -1.257520 | 1.089871  |
| H  | 0.356668  | -1.195519 | 1.709337  |
| C  | -3.299333 | -2.280961 | -0.373344 |
| O  | -4.195061 | -3.190084 | -0.452831 |
| C  | 3.299007  | -2.281386 | 0.373185  |
| O  | 4.194858  | -3.190363 | 0.452969  |
| C  | -2.506423 | -0.315656 | 0.650630  |
| O  | -2.626854 | 0.616861  | 1.527709  |
| C  | 2.506610  | -0.315686 | -0.650423 |
| O  | 2.627343  | 0.617015  | -1.527269 |
| H  | 1.214879  | 3.529121  | -0.172013 |
| H  | 1.854127  | 2.683524  | 1.086336  |
| H  | 2.230414  | 2.241791  | -0.474263 |
| H  | -1.214769 | 3.529163  | 0.172103  |
| H  | -1.854141 | 2.683530  | -1.086157 |
| H  | -2.230253 | 2.241812  | 0.474468  |
| N  | -1.493133 | 2.601262  | -0.138921 |
| N  | 1.493236  | 2.601236  | 0.139059  |

**Pt-U-N1N3-hh (M11L, SMD water)**

|    |           |           |           |
|----|-----------|-----------|-----------|
| Pt | -0.506858 | -1.000290 | -0.036886 |
| C  | -2.172852 | 3.377062  | 0.374723  |
| C  | -2.668099 | 2.615220  | -0.654169 |
| H  | -2.464843 | 4.425205  | 0.465270  |
| C  | 1.446828  | 0.921286  | -1.119791 |
| H  | 0.561692  | 1.179324  | -1.704279 |
| C  | 2.618543  | 1.605752  | -1.249537 |
| H  | 2.709466  | 2.436521  | -1.942950 |
| H  | -3.357465 | 3.014505  | -1.392329 |

|   |           |           |           |
|---|-----------|-----------|-----------|
| N | 3.571314  | 0.163454  | 0.418585  |
| N | 1.305249  | -0.120818 | -0.271592 |
| N | -1.335455 | 2.933200  | 1.326719  |
| N | -1.355967 | 0.828950  | 0.196221  |
| C | 3.731653  | 1.204714  | -0.450184 |
| O | 4.865991  | 1.790412  | -0.529795 |
| C | -2.240023 | 1.271203  | -0.752288 |
| O | -2.629709 | 0.459818  | -1.669521 |
| C | 2.388295  | -0.473677 | 0.505142  |
| O | 2.238166  | -1.453451 | 1.324476  |
| C | -0.948506 | 1.629411  | 1.235413  |
| O | -0.197707 | 1.128529  | 2.138048  |
| N | -2.396270 | -1.828602 | 0.102955  |
| H | -2.446397 | -2.802298 | -0.187974 |
| H | -2.780761 | -1.760333 | 1.042021  |
| N | 0.406072  | -2.847014 | -0.265660 |
| H | -0.147085 | -3.625455 | 0.084214  |
| H | 0.643480  | -3.040058 | -1.235558 |
| H | -2.960469 | -1.259052 | -0.531825 |
| H | 1.263758  | -2.758222 | 0.288389  |

**Pd-U-N1N3-ht (M11L, SMD water)**

|    |           |           |           |
|----|-----------|-----------|-----------|
| Pt | 0.485619  | -1.001625 | -0.030821 |
| C  | 2.362520  | 3.303493  | 0.236064  |
| C  | 1.504092  | 2.941395  | 1.240735  |
| H  | 2.774991  | 4.313831  | 0.208941  |
| C  | -1.445106 | 0.943622  | -1.112727 |
| H  | -0.556245 | 1.194138  | -1.695047 |
| C  | -2.611639 | 1.636228  | -1.246493 |
| H  | -2.695196 | 2.465952  | -1.942107 |
| H  | 1.219503  | 3.626710  | 2.033170  |
| N  | -3.578944 | 0.204512  | 0.422554  |
| N  | -1.313496 | -0.097315 | -0.261650 |
| N  | 2.770185  | 2.492804  | -0.758486 |
| N  | 1.366466  | 0.813160  | 0.199218  |
| C  | -3.729818 | 1.244524  | -0.449366 |
| O  | -4.860187 | 1.837158  | -0.533868 |
| C  | 0.984041  | 1.622396  | 1.239419  |
| O  | 0.207718  | 1.165006  | 2.145988  |
| C  | -2.400568 | -0.440585 | 0.513518  |
| O  | -2.258856 | -1.419391 | 1.335549  |
| C  | 2.257642  | 1.234737  | -0.754844 |
| O  | 2.613841  | 0.400050  | -1.662992 |
| N  | 2.362683  | -1.858721 | 0.107918  |
| H  | 2.399510  | -2.830320 | -0.191979 |
| H  | 2.931870  | -1.289556 | -0.523479 |
| N  | -0.454141 | -2.833324 | -0.270203 |
| H  | 0.089165  | -3.623123 | 0.069743  |
| H  | -1.308493 | -2.738192 | 0.287623  |
| H  | 2.748119  | -1.804187 | 1.047358  |
| H  | -0.697874 | -3.013784 | -1.240895 |

**Pt-U-N3N3-hh (M11L, SMD water)**

|    |          |           |           |
|----|----------|-----------|-----------|
| Pt | 0.002090 | -1.000047 | 0.001768  |
| C  | 3.380362 | 1.547304  | 0.546366  |
| C  | 3.199241 | 2.430340  | -0.488267 |
| H  | 4.188369 | 1.652590  | 1.263795  |
| H  | 3.872319 | 3.282341  | -0.603082 |
| N  | 2.235968 | 2.333542  | -1.419594 |

|   |           |           |           |
|---|-----------|-----------|-----------|
| N | 1.459846  | 0.399846  | -0.251542 |
| C | -2.325659 | 2.319012  | 1.352787  |
| H | -2.288785 | 3.044804  | 2.159225  |
| N | -1.453119 | 0.401871  | 0.257978  |
| N | -3.386444 | 1.483751  | -0.639117 |
| C | -3.275432 | 2.371037  | 0.366525  |
| H | -4.021593 | 3.167904  | 0.366726  |
| C | -1.369734 | 1.272825  | 1.312821  |
| O | -0.469603 | 1.105947  | 2.206245  |
| C | 2.466255  | 0.476063  | 0.674066  |
| O | 2.538264  | -0.417095 | 1.595078  |
| C | -2.460658 | 0.489229  | -0.669135 |
| O | -2.527639 | -0.411658 | -1.580375 |
| C | 1.378095  | 1.280966  | -1.300565 |
| O | 0.479971  | 1.097683  | -2.190014 |
| H | -2.225338 | -2.066333 | -0.450998 |
| H | -1.228597 | -3.350845 | -0.092999 |
| H | -1.879786 | -2.460003 | 1.128693  |
| H | 2.226102  | -2.085132 | 0.455397  |
| H | 1.218235  | -3.357100 | 0.091571  |
| H | 1.878205  | -2.466341 | -1.125474 |
| N | -1.502445 | -2.411465 | 0.185788  |
| N | 1.499776  | -2.418669 | -0.182917 |

**Pt-U-N3N3-ht (M11L, SMD water)**

|    |           |           |           |
|----|-----------|-----------|-----------|
| Pt | -0.000036 | -0.998733 | 0.000021  |
| C  | 2.325666  | 2.320758  | 1.350612  |
| C  | 3.277105  | 2.372087  | 0.365867  |
| H  | 2.286878  | 3.047752  | 2.155918  |
| H  | 4.022470  | 3.169725  | 0.366049  |
| N  | 3.390356  | 1.483583  | -0.638522 |
| N  | 1.456534  | 0.401481  | 0.256973  |
| C  | -2.325478 | 2.320790  | -1.350761 |
| H  | -2.286603 | 3.047728  | -2.156120 |
| N  | -1.456415 | 0.401607  | -0.256901 |
| N  | -3.390127 | 1.483896  | 0.638534  |
| C  | -3.276816 | 2.372325  | -0.365905 |
| H  | -4.022101 | 3.170038  | -0.366078 |
| C  | -1.369984 | 1.274224  | -1.310164 |
| O  | -0.466789 | 1.108913  | -2.200817 |
| C  | 1.370043  | 1.274325  | 1.310037  |
| O  | 0.466782  | 1.109246  | 2.200644  |
| C  | -2.465377 | 0.488365  | 0.668575  |
| O  | -2.534201 | -0.413536 | 1.578755  |
| C  | 2.465485  | 0.488165  | -0.668515 |
| O  | 2.534161  | -0.413702 | -1.578759 |
| H  | -1.878533 | -2.461222 | -1.131789 |
| H  | -1.228469 | -3.350470 | 0.091720  |
| H  | -2.227042 | -2.066566 | 0.446979  |
| H  | 1.878342  | -2.461429 | 1.131830  |
| H  | 1.227860  | -3.350771 | -0.091395 |
| H  | 2.226616  | -2.067143 | -0.447094 |
| N  | -1.502681 | -2.411564 | -0.188344 |
| N  | 1.502320  | -2.411870 | 0.188439  |

**Pt-C-Ia (M11L, SMD water)**

|    |           |           |           |
|----|-----------|-----------|-----------|
| Pt | -2.879870 | -2.903784 | -0.414911 |
|----|-----------|-----------|-----------|

|    |           |           |           |
|----|-----------|-----------|-----------|
| Pt | 2.903784  | -2.879870 | -0.414911 |
| Pt | 2.879870  | 2.903784  | -0.414911 |
| Pt | -2.903784 | 2.879870  | -0.414911 |
| C  | 0.048037  | -4.224352 | 2.469841  |
| C  | -1.168015 | -3.999942 | 1.800158  |
| C  | 1.193696  | -3.833006 | 1.842248  |
| H  | 0.066039  | -4.711326 | 3.437365  |
| H  | 2.167932  | -3.997184 | 2.298617  |
| C  | -3.833006 | -1.193696 | 1.842248  |
| C  | -4.224352 | -0.048037 | 2.469841  |
| H  | -3.997184 | -2.167932 | 2.298617  |
| C  | -3.999942 | 1.168015  | 1.800158  |
| H  | -4.711326 | -0.066039 | 3.437365  |
| C  | 3.999942  | -1.168015 | 1.800158  |
| C  | 4.224352  | 0.048037  | 2.469841  |
| C  | 3.833006  | 1.193696  | 1.842248  |
| H  | 4.711326  | 0.066039  | 3.437365  |
| H  | 3.997184  | 2.167932  | 2.298617  |
| N  | 3.247515  | 1.193696  | 0.629553  |
| N  | 1.193696  | -3.247515 | 0.629553  |
| N  | -1.171269 | -3.356129 | 0.612161  |
| N  | -3.247515 | -1.193696 | 0.629553  |
| N  | -3.356129 | 1.171269  | 0.612161  |
| C  | 1.168015  | 3.999942  | 1.800158  |
| C  | -0.048037 | 4.224352  | 2.469841  |
| C  | -1.193696 | 3.833006  | 1.842248  |
| H  | -0.066039 | 4.711326  | 3.437365  |
| H  | -2.167932 | 3.997184  | 2.298617  |
| N  | -1.193696 | 3.247515  | 0.629553  |
| N  | 1.171269  | 3.356129  | 0.612161  |
| H  | -4.585230 | 1.627031  | -1.932580 |
| H  | -5.438622 | 2.536550  | -0.857864 |
| H  | -4.812143 | 3.233289  | -2.208472 |
| H  | -1.475546 | 4.489926  | -1.842265 |
| H  | -3.040090 | 4.761450  | -2.266680 |
| H  | -2.449929 | 5.394736  | -0.869848 |
| H  | 3.233289  | 4.812143  | -2.208472 |
| H  | 1.627031  | 4.585230  | -1.932580 |
| H  | 2.536550  | 5.438622  | -0.857864 |
| H  | 5.394736  | 2.449929  | -0.869848 |
| H  | 4.489926  | 1.475546  | -1.842265 |
| H  | 4.761450  | 3.040090  | -2.266680 |
| H  | -5.394736 | -2.449929 | -0.869848 |
| H  | -4.489926 | -1.475546 | -1.842265 |
| H  | -4.761450 | -3.040090 | -2.266680 |
| H  | -1.627031 | -4.585230 | -1.932580 |
| H  | -2.536550 | -5.438622 | -0.857864 |
| H  | -3.233289 | -4.812143 | -2.208472 |
| H  | 2.449929  | -5.394736 | -0.869848 |
| H  | 1.475546  | -4.489926 | -1.842265 |
| H  | 3.040090  | -4.761450 | -2.266680 |
| H  | 4.585230  | -1.627031 | -1.932580 |
| H  | 5.438622  | -2.536550 | -0.857864 |
| H  | 4.812143  | -3.233289 | -2.208472 |
| N  | 4.634329  | -2.540373 | -1.482575 |
| N  | 2.423754  | -4.577253 | -1.477030 |
| N  | -2.540373 | -4.634329 | -1.482575 |
| N  | -4.577253 | -2.423754 | -1.477030 |
| N  | -4.634329 | 2.540373  | -1.482575 |
| N  | -2.423754 | 4.577253  | -1.477030 |



|   |           |           |           |
|---|-----------|-----------|-----------|
| N | 2.540373  | 4.634329  | -1.482575 |
| N | 4.577253  | 2.423754  | -1.477030 |
| N | 3.356129  | -1.171269 | 0.612161  |
| C | -0.003296 | 3.001617  | 0.003851  |
| O | 0.014457  | 2.462141  | -1.136046 |
| C | -3.001617 | -0.003296 | 0.003851  |
| O | -2.462141 | 0.014457  | -1.136046 |
| C | 0.003296  | -3.001617 | 0.003851  |
| O | -0.014457 | -2.462141 | -1.136046 |
| C | 3.001617  | 0.003296  | 0.003851  |
| O | 2.462141  | -0.014457 | -1.136046 |
| H | -4.277017 | 3.183899  | 1.781756  |
| H | -4.894375 | 2.360620  | 3.179236  |
| H | 3.183899  | 4.277017  | 1.781756  |
| H | 2.360620  | 4.894375  | 3.179236  |
| H | 4.894375  | -2.360620 | 3.179236  |
| H | 4.277017  | -3.183899 | 1.781756  |
| H | -3.183899 | -4.277017 | 1.781756  |
| H | -2.360620 | -4.894375 | 3.179236  |
| N | -2.326155 | -4.416938 | 2.294399  |
| N | -4.416938 | 2.326155  | 2.294399  |
| N | 2.326155  | 4.416938  | 2.294399  |
| N | 4.416938  | -2.326155 | 2.294399  |

**Pt-C-IIa (M11L, SMD water)**

|    |           |           |           |
|----|-----------|-----------|-----------|
| Pt | 3.920615  | 1.789756  | -0.046325 |
| Pt | 1.613203  | -3.511898 | -0.726495 |
| Pt | -3.849128 | -1.675219 | -0.152791 |
| Pt | -1.554542 | 3.663737  | -0.628028 |
| C  | -0.261252 | 2.886457  | 1.922140  |
| C  | -4.796485 | 2.126073  | 1.658775  |
| C  | 0.731628  | 2.515210  | 2.779746  |
| H  | -1.247147 | 3.167379  | 2.289086  |
| C  | 4.754823  | -0.663558 | 1.396239  |
| C  | -0.724561 | -2.593557 | 2.718491  |
| H  | 5.468834  | 0.048096  | 1.811552  |
| C  | 4.777158  | -1.977768 | 1.758554  |
| C  | 0.272046  | -2.940725 | 1.856677  |
| H  | 1.242274  | -3.271107 | 2.223929  |
| H  | -0.584662 | -2.625103 | 3.792517  |
| H  | 5.497474  | -2.362211 | 2.471581  |
| H  | 0.575480  | 2.482459  | 3.851567  |
| H  | -5.543643 | 2.528756  | 2.332938  |
| N  | 2.943693  | -2.326899 | 0.271856  |
| N  | 3.863399  | -0.163515 | 0.519121  |
| N  | 0.113170  | -2.922919 | 0.518620  |
| N  | -2.113679 | -2.168843 | 0.825945  |
| N  | -3.855112 | 0.270288  | 0.484313  |
| N  | -2.908162 | 2.427659  | 0.247835  |
| N  | -0.082595 | 2.953964  | 0.588650  |
| N  | 2.152976  | 2.232256  | 0.886035  |
| C  | 3.827932  | -2.826235 | 1.163124  |
| C  | -1.966622 | -2.230051 | 2.167097  |
| C  | -3.831357 | 2.910501  | 1.100553  |
| C  | 1.989261  | 2.213428  | 2.226893  |
| C  | 2.938931  | -0.995041 | -0.049386 |
| O  | 2.098236  | -0.551399 | -0.875006 |
| C  | 1.122367  | 2.589351  | 0.060033  |
| O  | 1.304763  | 2.604687  | -1.190876 |
| C  | -1.074649 | -2.498545 | -0.004122 |

|   |           |           |           |
|---|-----------|-----------|-----------|
| O | -1.234250 | -2.428102 | -1.256075 |
| C | -2.900658 | 1.095241  | -0.058274 |
| O | -2.039539 | 0.626769  | -0.847095 |
| N | 3.982353  | 3.762285  | -0.635075 |
| H | 4.783971  | 4.001297  | -1.216571 |
| H | 3.134912  | 3.949817  | -1.171700 |
| N | 5.687452  | 1.364473  | -1.013632 |
| H | 6.238429  | 2.193734  | -1.230367 |
| H | 6.276093  | 0.749555  | -0.452576 |
| N | 0.290504  | -4.724908 | -1.739747 |
| H | 0.666191  | -5.110842 | -2.604222 |
| H | -0.006721 | -5.505604 | -1.158138 |
| N | 3.153392  | -4.064003 | -1.981564 |
| H | 2.937674  | -4.878839 | -2.553905 |
| H | 3.366690  | -3.291415 | -2.610870 |
| N | -5.549242 | -1.252453 | -1.233511 |
| H | -5.745295 | -0.252646 | -1.255389 |
| H | -5.436683 | -1.557828 | -2.199472 |
| N | -3.871830 | -3.618385 | -0.831784 |
| H | -3.838632 | -4.275633 | -0.054897 |
| H | -4.690324 | -3.848007 | -1.393178 |
| N | -0.208923 | 4.955457  | -1.508028 |
| H | -0.554955 | 5.363224  | -2.374747 |
| H | 0.035983  | 5.720789  | -0.883434 |
| N | -3.049993 | 4.404176  | -1.837973 |
| H | -2.929117 | 5.394822  | -2.043444 |
| H | -3.064221 | 3.904349  | -2.725807 |
| H | -6.370438 | -1.723091 | -0.856304 |
| H | -3.967862 | 4.292594  | -1.409573 |
| H | 0.632775  | 4.415095  | -1.716839 |
| H | -3.039424 | -3.760845 | -1.404110 |
| H | 4.002613  | -4.276723 | -1.460556 |
| H | 3.991755  | 4.385167  | 0.170412  |
| H | 5.495459  | 0.885604  | -1.892288 |
| H | -0.525121 | -4.150763 | -1.962123 |
| C | -4.807875 | 0.766078  | 1.305915  |
| H | -3.771714 | 3.976229  | 1.316537  |
| N | -3.010791 | -1.953781 | 2.935897  |
| N | -5.748934 | -0.056692 | 1.758367  |
| N | 3.772090  | -4.122412 | 1.447600  |
| N | 3.036195  | 1.922491  | 2.988278  |
| H | -3.916426 | -1.772221 | 2.537165  |
| H | -2.926251 | -1.985668 | 3.937718  |
| H | -5.765244 | -1.031722 | 1.497190  |
| H | -6.468350 | 0.287196  | 2.371968  |
| H | 3.067814  | -4.715441 | 1.033325  |
| H | 4.421718  | -4.525753 | 2.101662  |
| H | 2.945425  | 1.907917  | 3.989995  |
| H | 3.949540  | 1.785524  | 2.584508  |

**Pt-C-IIIa (M11L, SMD water)**

|    |           |           |           |
|----|-----------|-----------|-----------|
| Pt | 2.820029  | 2.869621  | -0.439801 |
| Pt | -2.973946 | 2.826199  | -0.420204 |
| Pt | -2.989507 | -2.958611 | -0.293673 |
| Pt | 2.827274  | -3.012981 | -0.386712 |
| C  | -0.128441 | 2.571866  | 2.736928  |
| C  | 1.101085  | 2.679130  | 2.061191  |
| C  | -1.266124 | 2.601862  | 1.988798  |
| H  | -0.158475 | 2.495494  | 3.817500  |
| H  | -2.248740 | 2.554812  | 2.455448  |

|   |           |           |           |
|---|-----------|-----------|-----------|
| C | 5.333249  | -0.086010 | 1.413707  |
| C | 4.724795  | -1.233157 | 1.000800  |
| H | 6.238502  | -0.098778 | 2.009633  |
| C | -4.586095 | 1.163345  | 1.485971  |
| C | -5.060862 | -0.041975 | 2.032142  |
| C | -4.577342 | -1.203317 | 1.503884  |
| H | -5.785492 | -0.037878 | 2.837591  |
| H | -4.905536 | -2.174450 | 1.871544  |
| N | -3.672484 | -1.224697 | 0.507218  |
| N | -1.246414 | 2.708603  | 0.645897  |
| N | 1.123501  | 2.748946  | 0.711558  |
| N | 3.613530  | 1.125691  | 0.281857  |
| N | 3.595737  | -1.240663 | 0.266305  |
| C | -0.082530 | -2.630627 | 2.797242  |
| H | -0.090744 | -2.540790 | 3.877154  |
| N | 1.126949  | -2.854675 | 0.749905  |
| N | -1.239692 | -2.780060 | 0.727287  |
| H | 4.479937  | -2.504140 | -2.311969 |
| H | 5.358810  | -3.014392 | -1.019222 |
| H | 4.614336  | -4.108304 | -1.986359 |
| H | 1.148660  | -4.656499 | -1.388040 |
| H | 2.636917  | -5.227404 | -1.815750 |
| H | 2.066314  | -5.505103 | -0.301120 |
| H | -2.874505 | -5.076388 | -1.862307 |
| H | -1.360868 | -4.528332 | -1.487212 |
| H | -2.212000 | -5.449097 | -0.405170 |
| H | -5.564188 | -3.033024 | -0.626051 |
| H | -4.880624 | -2.401685 | -1.981154 |
| H | -4.908146 | -4.029308 | -1.754603 |
| H | 5.044143  | 3.821748  | -1.441748 |
| H | 5.042766  | 2.186513  | -1.644893 |
| H | 4.155524  | 3.136454  | -2.644779 |
| H | 1.170967  | 4.461969  | -1.575028 |
| H | 2.009441  | 5.346029  | -0.454149 |
| H | 2.682677  | 5.040022  | -1.921648 |
| H | -2.209278 | 5.302627  | -0.690737 |
| H | -1.320989 | 4.312927  | -1.679365 |
| H | -2.823485 | 4.828784  | -2.139003 |
| H | -4.899983 | 2.023496  | -1.949352 |
| H | -5.534857 | 3.083463  | -0.863053 |
| H | -4.750955 | 3.639512  | -2.192064 |
| N | -4.740994 | 2.913072  | -1.478532 |
| N | -2.262315 | 4.525349  | -1.345466 |
| N | 2.097210  | 4.645688  | -1.187584 |
| N | 4.458972  | 3.021451  | -1.678348 |
| N | 4.511995  | -3.189187 | -1.558507 |
| N | 2.099318  | -4.819783 | -1.052961 |
| N | -2.290418 | -4.718335 | -1.109306 |
| N | -4.789897 | -3.135413 | -1.280180 |
| N | -3.676411 | 1.138261  | 0.487917  |
| C | -0.053702 | -2.842426 | 0.056931  |
| O | -0.038880 | -2.919466 | -1.205601 |
| C | 3.019176  | -0.053979 | -0.098258 |
| O | 1.969831  | -0.034117 | -0.790966 |
| C | -0.046711 | 2.732321  | -0.002188 |
| O | -0.007435 | 2.762389  | -1.265764 |
| C | -3.204154 | -0.048338 | -0.004774 |
| O | -2.353708 | -0.048487 | -0.933975 |
| H | -5.688300 | 2.401715  | 2.659068  |
| H | -4.630174 | 3.200799  | 1.540445  |

|   |           |           |          |
|---|-----------|-----------|----------|
| H | 3.128241  | 2.845887  | 2.260208 |
| H | 2.245189  | 2.683776  | 3.733435 |
| N | 2.245780  | 2.724238  | 2.728506 |
| N | -5.005851 | 2.344871  | 1.922228 |
| C | -1.233909 | -2.648323 | 2.068023 |
| C | 4.744916  | 1.126847  | 1.020807 |
| C | 1.130430  | -2.773764 | 2.099085 |
| H | -2.209178 | -2.572905 | 2.547230 |
| N | 5.275582  | 2.297034  | 1.371778 |
| N | 2.291484  | -2.847735 | 2.735923 |
| H | 4.903940  | 3.173585  | 1.033923 |
| H | 6.130791  | 2.318742  | 1.902826 |
| H | 3.148601  | -3.017097 | 2.235486 |
| H | 2.322748  | -2.804494 | 3.740095 |
| H | 5.137498  | -2.210008 | 1.253864 |

| <b>Pt-C-IVa (M11L, SMD water)</b> |           |           |           |
|-----------------------------------|-----------|-----------|-----------|
| Pt                                | 4.126374  | -1.231005 | -0.077227 |
| Pt                                | -1.098347 | -3.707199 | -0.743075 |
| Pt                                | -4.126935 | 1.236902  | -0.068755 |
| Pt                                | 1.091538  | 3.722243  | -0.721873 |
| C                                 | 3.358979  | 3.308428  | 1.105185  |
| C                                 | -1.004145 | 2.357056  | 2.727454  |
| C                                 | 4.388092  | 2.681125  | 1.741053  |
| H                                 | 3.131188  | 4.357367  | 1.291710  |
| C                                 | -4.373643 | -2.666315 | 1.756842  |
| C                                 | 1.030417  | -2.435522 | 2.721484  |
| C                                 | -3.349668 | -3.295307 | 1.112259  |
| H                                 | -3.113706 | -4.340887 | 1.307427  |
| H                                 | -4.992329 | -3.177873 | 2.484225  |
| H                                 | 0.853020  | -2.443356 | 3.790449  |
| H                                 | 5.019203  | 3.196463  | 2.455011  |
| H                                 | -0.817708 | 2.334637  | 3.794795  |
| N                                 | 0.309573  | -2.917324 | 0.506705  |
| N                                 | 2.452904  | -1.962898 | 0.865183  |
| N                                 | -2.576043 | -2.676339 | 0.200445  |
| N                                 | -3.829349 | -0.696403 | 0.522928  |
| N                                 | -2.427669 | 1.905420  | 0.867636  |
| N                                 | -0.309384 | 2.916518  | 0.523068  |
| N                                 | 2.568984  | 2.683001  | 0.211647  |
| N                                 | 3.816171  | 0.698221  | 0.537985  |
| C                                 | 0.100844  | -2.895217 | 1.838097  |
| C                                 | -4.615483 | -1.322438 | 1.425431  |
| C                                 | -0.095598 | 2.872456  | 1.852989  |
| C                                 | 4.620502  | 1.332025  | 1.419518  |
| C                                 | 1.482865  | -2.422843 | 0.012613  |
| O                                 | 1.696753  | -2.401762 | -1.233639 |
| C                                 | 2.783282  | 1.365326  | -0.075669 |
| O                                 | 2.053186  | 0.763894  | -0.905396 |
| C                                 | -2.805275 | -1.365004 | -0.102964 |
| O                                 | -2.095975 | -0.770115 | -0.954298 |
| C                                 | -1.473372 | 2.408950  | 0.022503  |
| O                                 | -1.696145 | 2.418658  | -1.222417 |
| N                                 | 5.737534  | -0.503410 | -1.140424 |
| H                                 | 6.243590  | -1.229269 | -1.645560 |
| H                                 | 5.392525  | 0.165258  | -1.828409 |
| N                                 | 4.455889  | -3.157491 | -0.722324 |
| H                                 | 5.184183  | -3.243458 | -1.429277 |
| H                                 | 4.711460  | -3.761489 | 0.056256  |
| N                                 | -2.560180 | -4.488425 | -1.965346 |

|   |           |           |           |
|---|-----------|-----------|-----------|
| H | -2.207483 | -5.125392 | -2.677438 |
| H | -3.251404 | -4.995926 | -1.415045 |
| N | 0.359703  | -4.832318 | -1.666318 |
| H | 0.058295  | -5.253487 | -2.542652 |
| H | 1.144152  | -4.206236 | -1.854446 |
| N | -4.440368 | 3.176880  | -0.683479 |
| H | -3.570595 | 3.518509  | -1.094681 |
| H | -5.175294 | 3.273063  | -1.382327 |
| N | -5.802037 | 0.599142  | -1.083348 |
| H | -6.662253 | 0.815345  | -0.581708 |
| H | -5.865980 | 1.038735  | -2.000988 |
| N | 2.550743  | 4.513870  | -1.940798 |
| H | 2.196643  | 5.160118  | -2.643905 |
| H | 3.245488  | 5.013381  | -1.387616 |
| N | -0.368526 | 4.856771  | -1.630376 |
| H | -0.069725 | 5.290805  | -2.501233 |
| H | -1.150691 | 4.229923  | -1.825446 |
| H | -4.684228 | 3.773526  | 0.104447  |
| H | -0.688498 | 5.599185  | -1.012174 |
| H | 3.031225  | 3.760876  | -2.431533 |
| H | -5.773255 | -0.408642 | -1.232963 |
| H | 0.677076  | -5.584127 | -1.058255 |
| H | 6.414242  | -0.018064 | -0.553830 |
| H | 3.584498  | -3.501110 | -1.128804 |
| H | -3.044431 | -3.731037 | -2.445557 |
| C | -2.215834 | 1.874247  | 2.201771  |
| H | 0.848444  | 3.286449  | 2.203130  |
| C | 2.259503  | -1.992441 | 2.202102  |
| H | -0.853778 | -3.288206 | 2.183463  |
| N | -3.165765 | 1.397836  | 2.995140  |
| N | -5.606952 | -0.637335 | 1.991573  |
| N | 3.247336  | -1.610514 | 2.999500  |
| N | 5.633819  | 0.663893  | 1.962475  |
| H | -3.023920 | 1.373219  | 3.990930  |
| H | -4.044328 | 1.065336  | 2.632239  |
| H | -5.848318 | 0.295663  | 1.690331  |
| H | -6.208343 | -1.088010 | 2.661119  |
| H | 4.160673  | -1.403394 | 2.632826  |
| H | 3.124192  | -1.620032 | 3.997880  |
| H | 6.241176  | 1.120962  | 2.621770  |
| H | 5.823814  | -0.298466 | 1.727271  |

**Pt-C-Ib (M11L, SMD water)**

|    |           |           |           |
|----|-----------|-----------|-----------|
| Pt | 1.973035  | 3.576817  | 0.254531  |
| Pt | 3.800803  | -1.853449 | -0.072376 |
| Pt | -1.736164 | -3.602402 | -0.161831 |
| Pt | -3.563549 | 2.010510  | -0.611499 |
| C  | 2.500173  | 0.960813  | -3.073078 |
| C  | -0.908318 | 1.476818  | 2.675986  |
| C  | -2.008928 | 1.580675  | 1.876582  |
| H  | -2.982546 | 1.228896  | 2.214165  |
| C  | 1.864538  | -1.491192 | 2.136337  |
| C  | -5.229185 | -1.556229 | 1.086828  |
| H  | 2.759204  | -1.080421 | 2.599339  |
| C  | 0.687008  | -1.582340 | 2.815593  |
| C  | -4.281715 | -2.475479 | 0.753939  |
| H  | -4.398508 | -3.525337 | 1.023483  |
| H  | -6.128498 | -1.829905 | 1.626141  |
| H  | 0.590020  | -1.239799 | 3.839570  |
| H  | -0.962368 | 1.029586  | 3.662163  |

|   |           |           |           |
|---|-----------|-----------|-----------|
| N | -0.273673 | -2.598772 | 0.877878  |
| N | 1.995051  | -1.910290 | 0.862785  |
| N | -3.141189 | -2.153050 | 0.107988  |
| N | -3.873423 | 0.093430  | 0.017439  |
| N | -1.961508 | 2.114958  | 0.639900  |
| N | 0.347820  | 2.540950  | 0.950546  |
| N | 3.219769  | -0.203075 | -1.117290 |
| N | 2.491542  | 2.037372  | -0.956597 |
| C | 2.250879  | 2.043256  | -2.280360 |
| H | 1.842099  | 2.965542  | -2.690024 |
| H | 2.304601  | 0.976215  | -4.138839 |
| C | -4.976123 | -0.219772 | 0.734260  |
| C | 0.313254  | 1.952818  | 2.167828  |
| C | 2.972850  | -0.206456 | -2.445416 |
| C | -0.404730 | -2.173803 | 2.154041  |
| C | 3.021656  | 0.925448  | -0.371211 |
| O | 3.335655  | 0.938567  | 0.850150  |
| C | 0.914705  | -2.429224 | 0.211688  |
| O | 1.009631  | -2.780520 | -0.997233 |
| C | -2.938324 | -0.861358 | -0.298043 |
| O | -1.922780 | -0.551800 | -0.972802 |
| C | -0.770296 | 2.589543  | 0.165331  |
| O | -0.695243 | 3.091814  | -0.991602 |
| N | 1.434814  | 5.139650  | 1.484912  |
| H | 1.385884  | 6.022538  | 0.978714  |
| H | 0.519834  | 4.977256  | 1.903503  |
| N | 3.579205  | 4.655500  | -0.450051 |
| H | 3.429022  | 5.662049  | -0.406844 |
| H | 4.414839  | 4.442738  | 0.092106  |
| N | 4.382410  | -3.501189 | 1.016404  |
| H | 4.633482  | -4.280665 | 0.410615  |
| H | 5.190290  | -3.288639 | 1.599947  |
| N | 5.655378  | -1.813604 | -0.975645 |
| H | 5.810876  | -0.939097 | -1.474329 |
| H | 6.400373  | -1.908834 | -0.287132 |
| N | -0.384915 | -5.140833 | -0.389097 |
| H | -0.047921 | -5.467678 | 0.514590  |
| H | -0.761302 | -5.946298 | -0.884813 |
| N | -3.144729 | -4.672402 | -1.216192 |
| H | -3.515298 | -5.438191 | -0.655496 |
| H | -3.929810 | -4.088413 | -1.500922 |
| N | -3.317028 | 3.966906  | -1.206151 |
| H | -3.794470 | 4.186573  | -2.077634 |
| H | -3.659955 | 4.608477  | -0.494633 |
| N | -5.171287 | 1.864587  | -1.897127 |
| H | -5.525909 | 0.911246  | -1.957611 |
| H | -5.943600 | 2.462687  | -1.607037 |
| H | 0.407811  | -4.771338 | -0.914169 |
| H | 3.632539  | -3.815666 | 1.630235  |
| H | 5.755827  | -2.574322 | -1.645915 |
| H | 3.774975  | 4.417431  | -1.421751 |
| H | 2.105117  | 5.254599  | 2.243076  |
| H | -2.312935 | 4.108042  | -1.331181 |
| H | -2.743899 | -5.074597 | -2.062837 |
| H | -4.900044 | 2.145236  | -2.838890 |
| N | -5.802654 | 0.758359  | 1.085019  |
| N | 1.451722  | 1.872515  | 2.846588  |
| N | -1.563700 | -2.350773 | 2.775903  |
| N | 3.192173  | -1.325372 | -3.125934 |
| H | -6.634808 | 0.551398  | 1.612018  |

|   |           |           |           |
|---|-----------|-----------|-----------|
| H | -5.578323 | 1.724048  | 0.894606  |
| H | -2.335632 | -2.814527 | 2.327082  |
| H | -1.668595 | -2.065097 | 3.734692  |
| H | 3.420761  | -2.185344 | -2.651492 |
| H | 3.002973  | -1.360319 | -4.113346 |
| H | 1.464280  | 1.396374  | 3.734145  |
| H | 2.324577  | 1.958767  | 2.337469  |

**Pt-C-IIb1 (M11L, SMD water)**

|    |           |           |           |
|----|-----------|-----------|-----------|
| Pt | -0.702306 | 3.693670  | 0.091652  |
| Pt | -4.431562 | -0.701759 | -0.081678 |
| Pt | 0.623063  | -3.620573 | -0.465581 |
| Pt | 4.391855  | 0.901086  | -0.253575 |
| C  | 1.347775  | 0.953217  | 2.693601  |
| C  | -2.479345 | -1.092401 | 2.177036  |
| C  | -1.302096 | -1.588516 | 2.764856  |
| C  | -0.433778 | -2.270492 | 1.963283  |
| H  | -1.096766 | -1.426010 | 3.817079  |
| H  | 0.492018  | -2.680281 | 2.364387  |
| N  | -0.662432 | -2.482038 | 0.651445  |
| N  | 0.596111  | 2.355726  | 0.917800  |
| N  | 2.774468  | 1.444421  | 0.853072  |
| C  | 3.049196  | -3.406437 | 1.236345  |
| C  | 4.303824  | -2.898829 | 1.614869  |
| C  | 4.686024  | -1.709651 | 1.069943  |
| H  | 4.933787  | -3.436451 | 2.313257  |
| H  | 5.642181  | -1.251968 | 1.320205  |
| N  | 3.909910  | -1.017975 | 0.212717  |
| N  | 2.286597  | -2.734729 | 0.342701  |
| H  | 3.956518  | 3.333163  | -0.826422 |
| H  | 5.299678  | 3.313348  | 0.149868  |
| H  | 5.454009  | 2.997887  | -1.457034 |
| H  | 6.849500  | 0.821427  | -1.140935 |
| H  | 6.217445  | -0.694429 | -1.224171 |
| H  | 5.825162  | 0.421254  | -2.364987 |
| H  | 1.952271  | -5.734354 | -1.230664 |
| H  | 1.617849  | -4.816271 | -2.555008 |
| H  | 2.855991  | -4.398189 | -1.561845 |
| H  | -0.696726 | -5.202923 | -2.103349 |
| H  | -1.368098 | -5.281961 | -0.604929 |
| H  | -1.658776 | -3.958159 | -1.563942 |
| H  | -2.504472 | 5.571164  | 0.027436  |
| H  | -1.466872 | 5.804510  | -1.227611 |
| H  | -2.651708 | 4.669341  | -1.340879 |
| H  | 0.939010  | 4.801827  | 1.786101  |
| H  | 0.536706  | 5.920946  | 0.648489  |
| H  | -0.508260 | 5.578733  | 1.872935  |
| H  | -5.445749 | -3.022546 | 0.492349  |
| H  | -5.189639 | -2.229273 | 1.908370  |
| H  | -6.514119 | -1.882421 | 1.002969  |
| H  | -6.613540 | -0.904099 | -1.497198 |
| H  | -6.804245 | 0.319975  | -0.414451 |
| H  | -5.938165 | 0.565191  | -1.790232 |
| N  | -6.144261 | -0.112948 | -1.058457 |
| N  | -5.523728 | -2.116900 | 0.952407  |
| N  | 0.168884  | 5.170434  | 1.230327  |
| N  | -1.979439 | 5.095847  | -0.705225 |
| N  | 4.849807  | 2.869508  | -0.647971 |
| N  | 6.010070  | 0.292157  | -1.371517 |
| N  | 1.910573  | -4.777971 | -1.579276 |

|   |           |           |           |
|---|-----------|-----------|-----------|
| N | -0.959115 | -4.649504 | -1.289512 |
| N | -2.714801 | -1.306415 | 0.863762  |
| C | 2.696331  | -1.528023 | -0.163953 |
| O | 1.963910  | -0.908195 | -0.979738 |
| C | 1.799647  | 2.214609  | 0.290471  |
| O | 2.008809  | 2.814772  | -0.805240 |
| C | -1.805536 | -1.976094 | 0.088802  |
| O | -2.038575 | -2.136193 | -1.140300 |
| C | -2.003970 | 1.070128  | -3.061143 |
| H | -1.750579 | 0.860915  | -4.094090 |
| N | -3.320624 | 0.636453  | -1.128786 |
| N | -1.611451 | 2.259012  | -1.033065 |
| C | -2.659703 | 1.611885  | -0.445452 |
| O | -3.011213 | 1.921020  | 0.728861  |
| H | 3.126082  | -5.074686 | 2.391623  |
| H | -3.237973 | -0.245062 | 3.857458  |
| N | -3.391805 | -0.430283 | 2.880119  |
| N | 2.585126  | -4.550141 | 1.724628  |
| H | 1.668592  | -4.887041 | 1.467151  |
| H | -4.144605 | 0.053872  | 2.413321  |
| C | 2.541949  | 0.854819  | 2.043842  |
| H | 1.170679  | 0.456237  | 3.640997  |
| C | -3.010906 | 0.410411  | -2.419996 |
| C | -1.236308 | 1.971090  | -2.299954 |
| C | 0.331198  | 1.704260  | 2.074720  |
| H | -3.597926 | -0.355811 | -2.922772 |
| H | 3.364924  | 0.279986  | 2.465236  |
| N | -0.883939 | 1.816570  | 2.593199  |
| H | -1.099792 | 1.312960  | 3.438833  |
| H | -1.659024 | 2.140820  | 2.017778  |
| N | -0.142021 | 2.557359  | -2.768945 |
| H | 0.521086  | 2.977567  | -2.122754 |
| H | 0.166916  | 2.350548  | -3.704623 |

**Pt-C-IIb2 (M11L, SMD water)**

|    |           |           |           |
|----|-----------|-----------|-----------|
| Pt | 4.333339  | -1.017377 | -0.098405 |
| Pt | 1.093123  | 3.740439  | 0.229193  |
| Pt | -4.068162 | 1.180683  | -0.432578 |
| Pt | -0.791857 | -3.781800 | -0.335372 |
| C  | 2.390998  | -1.222945 | 2.131246  |
| C  | 1.275912  | -1.618453 | 2.808146  |
| H  | 3.192360  | -0.675795 | 2.625536  |
| C  | -0.128677 | 1.790896  | 2.149535  |
| C  | -1.208495 | 1.075694  | 2.701006  |
| C  | -2.370335 | 1.040414  | 1.986207  |
| H  | -1.105435 | 0.554822  | 3.646690  |
| H  | -3.237583 | 0.492124  | 2.349884  |
| N  | -2.517578 | 1.660828  | 0.798148  |
| N  | 2.580007  | -1.496783 | 0.826268  |
| N  | 0.486009  | -2.614594 | 0.784012  |
| C  | -4.778207 | -1.409500 | 0.830760  |
| C  | -4.625217 | -2.767755 | 1.158243  |
| C  | -3.469643 | -3.372986 | 0.769563  |
| H  | -5.394806 | -3.299833 | 1.705331  |
| H  | -3.283787 | -4.424302 | 0.993335  |
| N  | -2.484436 | -2.726145 | 0.111172  |
| N  | -3.819998 | -0.772653 | 0.120378  |
| H  | 1.230778  | -5.365308 | 0.092870  |
| H  | 0.600846  | -5.759178 | -1.372506 |
| H  | 1.528578  | -4.393248 | -1.212768 |

|   |           |           |           |
|---|-----------|-----------|-----------|
| H | -1.553042 | -5.161352 | -2.405730 |
| H | -2.112572 | -5.910639 | -1.050293 |
| H | -2.898087 | -4.595413 | -1.653135 |
| H | -5.380828 | 0.927480  | -2.658262 |
| H | -5.751633 | -0.364358 | -1.717921 |
| H | -6.477832 | 1.086177  | -1.442895 |
| H | -4.857554 | 3.262871  | -1.842855 |
| H | -4.894619 | 3.644487  | -0.242933 |
| H | -3.435503 | 3.561748  | -1.038753 |
| H | 5.972041  | 0.159300  | -1.751206 |
| H | 6.772460  | -0.140413 | -0.347448 |
| H | 6.550472  | -1.348489 | -1.443020 |
| H | 4.625619  | -3.103540 | 1.446431  |
| H | 5.772379  | -3.167074 | 0.270955  |
| H | 5.974613  | -2.171375 | 1.564936  |
| H | 0.043591  | 6.039840  | 0.862645  |
| H | -0.493616 | 4.910719  | 1.931656  |
| H | 1.011304  | 5.555288  | 2.101375  |
| H | 2.023623  | 5.856409  | -0.975616 |
| H | 3.082867  | 5.422839  | 0.207452  |
| H | 3.070544  | 4.612278  | -1.222906 |
| N | 2.477111  | 5.061720  | -0.527421 |
| N | 0.325675  | 5.234588  | 1.419584  |
| N | 5.286236  | -2.541756 | 0.911523  |
| N | 6.112504  | -0.533388 | -1.016720 |
| N | 0.827541  | -4.978964 | -0.758739 |
| N | -1.977901 | -5.002436 | -1.492734 |
| N | -5.598631 | 0.642613  | -1.704077 |
| N | -4.367276 | 3.148747  | -0.958249 |
| N | -0.307340 | 2.472586  | 0.993756  |
| C | -2.652604 | -1.411037 | -0.227713 |
| O | -1.763742 | -0.794935 | -0.870278 |
| C | 1.605305  | -2.155001 | 0.131750  |
| O | 1.739323  | -2.369318 | -1.105046 |
| C | -1.481157 | 2.399461  | 0.305260  |
| O | -1.601972 | 3.030679  | -0.785469 |
| C | 2.195200  | 1.165607  | -3.038241 |
| C | 3.083167  | 0.345695  | -2.406987 |
| H | 1.955647  | 1.048608  | -4.088586 |
| N | 1.877700  | 2.278990  | -0.953316 |
| N | 3.371133  | 0.460122  | -1.095864 |
| C | 2.818999  | 1.476314  | -0.374880 |
| O | 3.174992  | 1.683778  | 0.820252  |
| H | -6.594063 | -1.186469 | 1.707052  |
| H | 1.224336  | 1.306349  | 3.561958  |
| N | 1.065832  | 1.843484  | 2.724550  |
| N | -5.855793 | -0.727791 | 1.199241  |
| H | -5.942238 | 0.259520  | 1.010124  |
| H | 1.877696  | 2.106253  | 2.168990  |
| H | 1.139963  | -1.399064 | 3.861178  |
| C | 1.519878  | 2.113789  | -2.247282 |
| C | 0.316712  | -2.367745 | 2.102574  |
| N | -0.749705 | -2.866369 | 2.715157  |
| N | 0.529147  | 2.862221  | -2.717330 |
| H | 3.585855  | -0.462598 | -2.936368 |
| H | -0.889161 | -2.706641 | 3.698577  |
| H | -1.399164 | -3.459985 | 2.228000  |
| H | -0.116790 | 3.296826  | -2.064849 |
| H | 0.238690  | 2.747922  | -3.674468 |

| <b>Pt-C-Iib3 (M11L, SMD water)</b> |           |           |           |
|------------------------------------|-----------|-----------|-----------|
| Pt                                 | -2.380598 | 3.380236  | 0.160595  |
| Pt                                 | -3.699057 | -2.286689 | 0.089519  |
| Pt                                 | 1.982214  | -3.345481 | -0.524964 |
| Pt                                 | 3.312514  | 2.417947  | -0.391107 |
| C                                  | -0.569185 | 2.547867  | 2.353915  |
| C                                  | 0.609785  | 2.275780  | 2.981850  |
| H                                  | -1.512028 | 2.572470  | 2.897518  |
| C                                  | -1.708791 | -2.206033 | 2.269702  |
| C                                  | -0.513311 | -2.373544 | 2.900724  |
| H                                  | -0.411336 | -2.251964 | 3.972901  |
| N                                  | 0.459979  | -2.867706 | 0.776307  |
| N                                  | -0.638518 | 2.823852  | 1.038055  |
| N                                  | 1.700188  | 2.508085  | 0.869609  |
| C                                  | 4.369143  | -2.099352 | 0.737654  |
| C                                  | 5.251566  | -1.061318 | 1.077657  |
| C                                  | 4.884702  | 0.203725  | 0.730721  |
| H                                  | 6.185655  | -1.269179 | 1.586012  |
| H                                  | 5.526633  | 1.056834  | 0.951695  |
| N                                  | 3.726949  | 0.483134  | 0.100414  |
| N                                  | 3.206979  | -1.826192 | 0.103435  |
| H                                  | 3.048120  | 4.990958  | -0.072868 |
| H                                  | 3.570231  | 4.741617  | -1.611580 |
| H                                  | 1.991316  | 4.429671  | -1.215908 |
| H                                  | 4.588985  | 2.490883  | -2.650679 |
| H                                  | 5.560949  | 3.144638  | -1.495891 |
| H                                  | 5.433229  | 1.512332  | -1.638394 |
| H                                  | 3.841882  | -4.748226 | -1.726769 |
| H                                  | 3.017669  | -3.864683 | -2.841594 |
| H                                  | 4.182223  | -3.150627 | -1.934494 |
| H                                  | 1.248405  | -5.398003 | -1.996706 |
| H                                  | 0.741803  | -5.637245 | -0.451934 |
| H                                  | -0.069100 | -4.569471 | -1.428973 |
| H                                  | -4.877405 | 4.107828  | 0.015370  |
| H                                  | -4.049269 | 4.868061  | -1.186376 |
| H                                  | -4.506476 | 3.298465  | -1.364581 |
| H                                  | -1.558983 | 5.144773  | 1.904451  |
| H                                  | -2.181067 | 5.936684  | 0.606668  |
| H                                  | -3.187071 | 5.298836  | 1.741377  |
| H                                  | -4.484015 | -4.750185 | 0.458015  |
| H                                  | -3.478289 | -4.351245 | 1.692660  |
| H                                  | -5.036165 | -3.832630 | 1.706207  |
| H                                  | -5.791971 | -3.096534 | -1.241120 |
| H                                  | -6.297621 | -2.104035 | -0.029788 |
| H                                  | -5.673634 | -1.466978 | -1.410768 |
| N                                  | -5.582714 | -2.232210 | -0.744285 |
| N                                  | -4.232787 | -4.003176 | 1.103405  |
| N                                  | -2.321138 | 5.141960  | 1.228177  |
| N                                  | -4.157251 | 3.982505  | -0.694684 |
| N                                  | 2.955091  | 4.383157  | -0.883742 |
| N                                  | 4.909668  | 2.385161  | -1.689139 |
| N                                  | 3.427479  | -3.834840 | -1.908543 |
| N                                  | 0.850743  | -4.935814 | -1.181266 |
| N                                  | -1.853511 | -2.369451 | 0.940853  |
| C                                  | 2.868689  | -0.533406 | -0.221863 |
| O                                  | 1.790224  | -0.299104 | -0.824606 |
| C                                  | 0.495221  | 2.787534  | 0.281360  |
| O                                  | 0.439549  | 3.033190  | -0.955270 |
| C                                  | -0.758988 | -2.651809 | 0.177827  |
| O                                  | -0.862141 | -2.751363 | -1.076090 |

|   |           |           |           |
|---|-----------|-----------|-----------|
| C | -2.582527 | 0.444693  | -2.968118 |
| H | -2.432241 | 0.404995  | -4.040548 |
| N | -3.196339 | -0.608186 | -0.927369 |
| N | -2.499025 | 1.646747  | -0.907877 |
| C | -2.942927 | 0.540490  | -0.234677 |
| O | -3.130773 | 0.593730  | 1.011655  |
| H | 5.515563  | -3.585427 | 1.505318  |
| N | 4.651413  | -3.365520 | 1.038059  |
| H | 4.062947  | -4.130392 | 0.740508  |
| H | 0.658370  | 2.076425  | 4.045930  |
| C | -3.029479 | -0.633831 | -2.262658 |
| C | 1.780294  | 2.295393  | 2.201853  |
| N | 2.978237  | 2.124776  | 2.745372  |
| H | 3.068206  | 1.965176  | 3.734449  |
| H | 3.815964  | 2.222439  | 2.194979  |
| C | 0.590479  | -2.756290 | 2.116455  |
| C | -2.280209 | 1.609130  | -2.241427 |
| H | -2.610840 | -1.946301 | 2.821699  |
| H | -3.259706 | -1.577649 | -2.754260 |
| N | -1.798323 | 2.704060  | -2.819449 |
| N | 1.761984  | -3.027801 | 2.676397  |
| H | -1.355053 | 3.403197  | -2.238781 |
| H | -1.602380 | 2.702697  | -3.806785 |
| H | 1.870015  | -2.967316 | 3.674722  |
| H | 2.545450  | -3.353510 | 2.135427  |

**Pt-C-IIb4 (M11L, SMD water)**

|    |           |           |           |
|----|-----------|-----------|-----------|
| Pt | -3.188003 | 2.683214  | -0.194082 |
| Pt | -2.806260 | -3.014929 | 0.391561  |
| Pt | 2.917554  | -2.919533 | -0.634778 |
| Pt | 2.599801  | 2.937398  | -0.187257 |
| C  | -0.330053 | 1.984407  | 2.875725  |
| C  | -0.756872 | -1.720970 | 2.181220  |
| C  | 0.560995  | -1.522832 | 2.633282  |
| C  | 1.575818  | -1.949698 | 1.826581  |
| H  | 0.755036  | -1.043584 | 3.586691  |
| H  | 2.615572  | -1.838403 | 2.128867  |
| N  | 1.362453  | -2.523166 | 0.625885  |
| N  | -1.448262 | 2.366381  | 0.814851  |
| N  | 0.920406  | 2.455054  | 0.895977  |
| C  | 4.897397  | -1.144664 | 0.598565  |
| C  | 5.442164  | -0.014162 | 1.128244  |
| H  | 6.374927  | -0.031084 | 1.679291  |
| N  | 3.580818  | 1.194110  | 0.241112  |
| N  | 3.738522  | -1.143471 | -0.088658 |
| H  | 2.276473  | 5.371642  | -1.151405 |
| H  | 0.863471  | 4.505170  | -1.210380 |
| H  | 1.363683  | 5.199330  | 0.202974  |
| H  | 4.694189  | 4.299007  | -0.965257 |
| H  | 4.897087  | 2.737847  | -1.445531 |
| H  | 3.898082  | 3.730267  | -2.286370 |
| H  | 4.946420  | -4.177497 | -1.701293 |
| H  | 4.183390  | -3.307457 | -2.870955 |
| H  | 5.212840  | -2.560567 | -1.831963 |
| H  | 1.135014  | -4.615093 | -1.259683 |
| H  | 2.531916  | -5.156458 | -1.981177 |
| H  | 2.279808  | -5.439097 | -0.380742 |
| H  | -5.723390 | 3.215701  | -0.498814 |
| H  | -4.908258 | 3.825840  | -1.791284 |
| H  | -5.257898 | 2.220105  | -1.719761 |

|   |           |           |           |
|---|-----------|-----------|-----------|
| H | -2.572700 | 4.702118  | 1.347075  |
| H | -3.559025 | 5.247268  | 0.150586  |
| H | -4.193868 | 4.443353  | 1.437613  |
| H | -1.707549 | -4.643929 | 2.106891  |
| H | -3.313161 | -4.535764 | 2.449360  |
| H | -2.794903 | -5.494730 | 1.216895  |
| H | -4.584867 | -4.722080 | -0.476076 |
| H | -5.340490 | -3.608640 | 0.471643  |
| H | -4.942106 | -3.234793 | -1.078933 |
| N | -4.627744 | -3.730545 | -0.246061 |
| N | -2.637026 | -4.607057 | 1.691064  |
| N | -3.401328 | 4.477010  | 0.798191  |
| N | -4.974986 | 3.025979  | -1.163767 |
| N | 1.680382  | 4.723832  | -0.639668 |
| N | 4.212169  | 3.486437  | -1.347521 |
| N | 4.499106  | -3.284535 | -1.902271 |
| N | 2.137710  | -4.763462 | -1.128432 |
| N | -0.968848 | -2.357070 | 1.007258  |
| C | 3.069874  | 0.033779  | -0.289248 |
| O | 2.006437  | 0.065054  | -0.958857 |
| C | -0.250340 | 2.496959  | 0.176473  |
| O | -0.208189 | 2.687794  | -1.069184 |
| C | 0.077220  | -2.710668 | 0.200748  |
| O | -0.156691 | -3.228533 | -0.927307 |
| C | -2.660275 | -0.508770 | -3.048892 |
| H | -2.485777 | -0.624634 | -4.112073 |
| N | -2.946340 | -1.453918 | -0.890169 |
| N | -3.010760 | 0.892886  | -1.150255 |
| C | -3.143415 | -0.213959 | -0.357681 |
| O | -3.453699 | -0.086479 | 0.857844  |
| H | -1.691188 | -0.833012 | 3.739064  |
| N | -1.820294 | -1.334916 | 2.875646  |
| H | -2.707260 | -1.242476 | 2.393645  |
| H | -0.359251 | 1.768009  | 3.937597  |
| C | -2.729570 | -1.583143 | -2.211765 |
| C | -2.771115 | 0.770016  | -2.474432 |
| C | -1.468461 | 2.100098  | 2.135037  |
| H | -2.607973 | -2.599448 | -2.581672 |
| N | -2.658942 | 1.872702  | -3.206052 |
| H | -2.622621 | 2.783433  | -2.775035 |
| H | -2.466104 | 1.804187  | -4.191117 |
| C | 0.897963  | 2.199542  | 2.222371  |
| C | 4.736359  | 1.185913  | 0.943179  |
| N | 2.040585  | 2.176718  | 2.896594  |
| N | 5.178622  | 2.330197  | 1.458163  |
| H | 4.698144  | 3.204689  | 1.306612  |
| H | 6.041454  | 2.345316  | 1.976620  |
| H | 2.037879  | 2.002781  | 3.887431  |
| H | 2.921656  | 2.368955  | 2.451443  |
| H | -2.453296 | 1.991885  | 2.586866  |
| H | 5.380852  | -2.113859 | 0.718094  |

**Pt-C-IIIb1 (M11L, SMD water)**

|    |           |           |           |
|----|-----------|-----------|-----------|
| Pt | 3.694535  | -1.626251 | -0.349056 |
| Pt | 1.225316  | 3.756986  | -0.578771 |
| Pt | -4.086152 | 1.506512  | 0.202369  |
| Pt | -1.667265 | -3.767943 | 0.062636  |
| C  | -0.129068 | -2.598251 | 2.304501  |
| C  | -2.436573 | -0.802887 | -2.963667 |
| H  | -1.060116 | -2.829611 | 2.819382  |

|   |           |           |           |
|---|-----------|-----------|-----------|
| C | 0.944999  | -2.087438 | 2.970176  |
| C | -2.045766 | 1.885061  | 2.324250  |
| C | 4.839839  | 2.271030  | 1.066192  |
| H | -2.834015 | 1.412971  | 2.908746  |
| C | -0.898143 | 2.332694  | 2.908908  |
| C | 3.776934  | 3.017573  | 0.659960  |
| H | 3.755826  | 4.096544  | 0.815575  |
| H | 5.696287  | 2.712720  | 1.561523  |
| H | -0.727386 | 2.244852  | 3.975383  |
| H | 0.918013  | -1.895218 | 4.036336  |
| N | -0.156102 | 3.019799  | 0.745156  |
| N | -2.287410 | 2.018147  | 1.005804  |
| N | 2.701628  | 2.489242  | 0.042503  |
| N | 3.721395  | 0.354965  | 0.176487  |
| N | 2.126503  | -2.064191 | 0.895271  |
| N | -0.099040 | -2.864731 | 0.984651  |
| N | -3.235305 | 0.023431  | -0.883943 |
| N | -2.162164 | -2.077544 | -0.965675 |
| C | -3.061443 | 0.148398  | -2.212109 |
| H | -2.290237 | -0.683756 | -4.030822 |
| H | -3.443779 | 1.063613  | -2.660542 |
| C | 4.794157  | 0.892757  | 0.799626  |
| C | 2.117307  | -1.849387 | 2.228456  |
| C | -1.955546 | -1.941850 | -2.293677 |
| C | 0.044187  | 2.969700  | 2.080472  |
| C | 2.657587  | 1.143521  | -0.201568 |
| O | 1.671181  | 0.628599  | -0.787169 |
| C | 1.022090  | -2.578551 | 0.265499  |
| O | 1.057146  | -2.804388 | -0.975394 |
| C | -1.322470 | 2.547052  | 0.198043  |
| O | -1.507869 | 2.630640  | -1.047090 |
| C | -2.796735 | -1.100252 | -0.246998 |
| O | -2.977270 | -1.248599 | 0.993179  |
| N | -0.204275 | 5.103901  | -1.196509 |
| H | -0.478988 | 5.719174  | -0.433779 |
| H | 0.084095  | 5.689002  | -1.978227 |
| N | 2.565924  | 4.502324  | -1.953267 |
| H | 2.456375  | 4.016179  | -2.842218 |
| H | 2.429674  | 5.497134  | -2.127213 |
| N | 5.221147  | -1.243931 | -1.681804 |
| H | 5.462110  | -0.254677 | -1.728487 |
| H | 6.069425  | -1.757634 | -1.445232 |
| N | 3.741420  | -3.611197 | -0.888351 |
| H | 2.793741  | -3.860383 | -1.175326 |
| H | 4.379299  | -3.803616 | -1.658635 |
| N | -3.281402 | -4.674824 | -0.843350 |
| H | -3.435735 | -5.634058 | -0.537585 |
| H | -4.128873 | -4.147540 | -0.638796 |
| N | -1.183639 | -5.475389 | 1.112076  |
| H | -1.754348 | -6.282296 | 0.864696  |
| H | -0.210686 | -5.723611 | 0.940121  |
| N | -5.896952 | 0.963676  | -0.615993 |
| H | -6.047951 | -0.036507 | -0.495845 |
| H | -6.694824 | 1.444473  | -0.204172 |
| N | -4.962900 | 3.034280  | 1.279666  |
| H | -4.904574 | 3.911027  | 0.764027  |
| H | -5.946871 | 2.860118  | 1.479834  |
| H | 3.532099  | 4.376414  | -1.655324 |
| H | -1.014869 | 4.549194  | -1.477788 |
| H | 4.014808  | -4.200459 | -0.105004 |

|   |           |           |           |
|---|-----------|-----------|-----------|
| H | 4.941347  | -1.529625 | -2.619842 |
| H | -3.165499 | -4.693625 | -1.855704 |
| H | -1.289979 | -5.322159 | 2.114207  |
| H | -4.494206 | 3.174265  | 2.173797  |
| H | -5.904680 | 1.158954  | -1.616050 |
| N | 3.230455  | -1.432794 | 2.816969  |
| N | -1.314001 | -2.915708 | -2.929450 |
| N | 5.801836  | 0.099302  | 1.153553  |
| N | 1.128895  | 3.548921  | 2.579054  |
| H | 5.809965  | -0.886750 | 0.938956  |
| H | 6.608228  | 0.492922  | 1.609787  |
| H | 1.305429  | 3.531652  | 3.569267  |
| H | 1.740434  | 4.092538  | 1.990978  |
| H | -1.125434 | -2.833078 | -3.914463 |
| H | -0.807404 | -3.609411 | -2.398766 |
| H | 4.089672  | -1.331805 | 2.302495  |
| H | 3.246082  | -1.262456 | 3.808222  |

**Pt-C-IIIb2 (M11L, SMD water)**

|    |           |           |           |
|----|-----------|-----------|-----------|
| Pt | -0.531490 | 3.724141  | -0.418905 |
| Pt | -4.321987 | -0.789925 | -0.300875 |
| Pt | 0.705389  | -3.689252 | 0.036513  |
| Pt | 4.457086  | 0.692107  | -0.023007 |
| C  | 2.043905  | -1.012135 | -3.055290 |
| C  | 1.286118  | 1.567006  | 2.779243  |
| C  | -4.175617 | 3.055121  | 1.628176  |
| C  | -1.369296 | -1.047527 | 2.716305  |
| H  | -4.782945 | 3.623794  | 2.322487  |
| H  | -1.208527 | -0.598961 | 3.690730  |
| H  | 1.060150  | 1.386449  | 3.824367  |
| N  | -2.771168 | -1.456366 | 0.836003  |
| N  | -0.592805 | -2.368526 | 0.890998  |
| N  | -3.816854 | 1.090083  | 0.319026  |
| N  | -2.208927 | 2.825269  | 0.305981  |
| N  | 0.697355  | 2.506082  | 0.671958  |
| N  | 2.736280  | 1.312617  | 0.900746  |
| N  | 1.635386  | -2.239816 | -1.054166 |
| N  | 3.345839  | -0.617850 | -1.105023 |
| H  | 1.798033  | -0.781227 | -4.085528 |
| C  | -2.983409 | 3.522039  | 1.162004  |
| C  | 0.438006  | 2.269307  | 1.973325  |
| C  | 3.046688  | -0.366175 | -2.393810 |
| C  | -2.557387 | -0.927590 | 2.058775  |
| C  | -2.611861 | 1.588051  | -0.113557 |
| O  | -1.899251 | 0.914972  | -0.904121 |
| C  | 1.846792  | 2.004552  | 0.121787  |
| O  | 2.106135  | 2.195340  | -1.098254 |
| C  | -1.788933 | -2.204094 | 0.256276  |
| O  | -1.983097 | -2.763231 | -0.863540 |
| C  | 2.678790  | -1.605058 | -0.445423 |
| O  | 3.020449  | -1.937038 | 0.725757  |
| N  | -4.808039 | -2.696409 | -0.906172 |
| H  | -5.347965 | -3.187720 | -0.197361 |
| H  | -5.338226 | -2.720549 | -1.775386 |
| N  | -5.862764 | -0.055392 | -1.458071 |
| H  | -5.732049 | -0.318917 | -2.433711 |
| H  | -6.764027 | -0.423550 | -1.156366 |
| N  | -1.750247 | 4.997358  | -1.484237 |
| H  | -2.735398 | 4.846451  | -1.272014 |
| H  | -1.540171 | 5.973928  | -1.281821 |

|   |           |           |           |
|---|-----------|-----------|-----------|
| N | 1.099072  | 4.763919  | -1.131330 |
| H | 1.804119  | 4.074051  | -1.396151 |
| H | 0.876224  | 5.338077  | -1.942399 |
| N | 6.165465  | 0.069508  | -0.988505 |
| H | 6.980704  | 0.641731  | -0.773087 |
| H | 6.388344  | -0.891428 | -0.734278 |
| N | 5.556315  | 2.072854  | 1.043012  |
| H | 6.239307  | 1.621368  | 1.649408  |
| H | 6.064005  | 2.693091  | 0.413672  |
| N | 1.999636  | -5.047710 | -0.811089 |
| H | 2.959956  | -4.721057 | -0.718165 |
| H | 1.948168  | -5.974423 | -0.391502 |
| N | -0.219108 | -5.170477 | 1.127962  |
| H | -0.893618 | -5.671659 | 0.552599  |
| H | 0.441261  | -5.852366 | 1.498605  |
| H | -5.918138 | 0.961221  | -1.424097 |
| H | -3.919672 | -3.181533 | -1.047525 |
| H | 1.484302  | 5.375968  | -0.415541 |
| H | -1.628553 | 4.855002  | -2.485910 |
| H | 6.028189  | 0.096315  | -1.997945 |
| H | 4.962456  | 2.656754  | 1.630487  |
| H | -0.724081 | -4.773052 | 1.918469  |
| H | 1.803907  | -5.149467 | -1.805570 |
| H | 3.638426  | 0.409006  | -2.877004 |
| C | 1.268986  | -1.925662 | -2.317177 |
| C | -0.339726 | -1.759460 | 2.073130  |
| H | -3.391723 | -0.386054 | 2.500914  |
| H | -0.494248 | 2.680126  | 2.359218  |
| C | 2.476388  | 1.082410  | 2.207441  |
| C | -4.589481 | 1.788678  | 1.180147  |
| H | -2.599921 | 4.495726  | 1.464737  |
| N | -5.730798 | 1.247405  | 1.589491  |
| N | 0.875523  | -1.877834 | 2.589273  |
| N | 3.375577  | 0.413507  | 2.919700  |
| N | 0.175393  | -2.497740 | -2.805022 |
| H | -5.993447 | 0.310970  | 1.321091  |
| H | -6.328041 | 1.749365  | 2.224831  |
| H | -0.495148 | -2.924172 | -2.170902 |
| H | -0.126623 | -2.270111 | -3.738123 |
| H | 1.653563  | -2.179760 | 2.005201  |
| H | 1.086608  | -1.403708 | 3.452826  |
| H | 4.155015  | -0.040181 | 2.467073  |
| H | 3.206367  | 0.218464  | 3.892427  |

**Pt-C-IVb (M11L, SMD water)**

|    |           |           |           |
|----|-----------|-----------|-----------|
| Pt | -4.096949 | -1.404856 | -0.416702 |
| Pt | 1.195791  | -3.708885 | 0.302576  |
| Pt | 4.285044  | 1.134768  | -0.172281 |
| Pt | -0.958707 | 3.626184  | -0.366986 |
| C  | 2.421995  | 1.363149  | 2.122400  |
| C  | 2.140481  | -1.147492 | -3.025984 |
| H  | 3.267972  | 0.882338  | 2.611405  |
| C  | 1.313845  | 1.736519  | 2.822760  |
| C  | -4.784683 | 2.442554  | 1.189895  |
| C  | -1.187020 | -1.005051 | 2.649371  |
| C  | -4.888190 | 1.171331  | 0.711406  |
| C  | -2.355398 | -1.048972 | 1.945937  |
| H  | -3.235422 | -0.506715 | 2.287246  |
| H  | -5.782113 | 0.573322  | 0.883677  |
| H  | -5.582116 | 2.912481  | 1.753469  |

|   |           |           |           |
|---|-----------|-----------|-----------|
| H | -1.091682 | -0.428749 | 3.563194  |
| H | 1.228085  | 1.563584  | 3.889593  |
| N | -2.495596 | -1.745899 | 0.799404  |
| N | -0.257737 | -2.472838 | 1.019095  |
| N | -3.904076 | 0.573300  | 0.012398  |
| N | -2.606173 | 2.543563  | 0.206265  |
| N | 0.395393  | 2.584968  | 0.787118  |
| N | 2.545809  | 1.575824  | 0.798491  |
| N | 1.917783  | -2.250800 | -0.923648 |
| N | 3.345732  | -0.385473 | -1.124346 |
| C | 3.017556  | -0.292090 | -2.427280 |
| H | 3.477871  | 0.527367  | -2.976968 |
| H | 1.868094  | -1.048225 | -4.070045 |
| C | -3.594017 | 3.133865  | 0.917521  |
| C | 0.290571  | 2.401260  | 2.122334  |
| C | 1.520837  | -2.110795 | -2.209280 |
| C | -0.090450 | -1.719144 | 2.130272  |
| C | -2.745931 | 1.256140  | -0.252903 |
| O | -1.822948 | 0.724708  | -0.921647 |
| C | 1.504826  | 2.131572  | 0.111177  |
| O | 1.567123  | 2.263680  | -1.142304 |
| C | 2.845638  | -1.409701 | -0.378412 |
| O | 3.236111  | -1.589607 | 0.810705  |
| C | -1.443870 | -2.486997 | 0.345350  |
| O | -1.560057 | -3.206743 | -0.689954 |
| H | -4.867047 | -3.605621 | -1.640428 |
| H | -3.404437 | -3.799637 | -0.874982 |
| H | -4.827370 | -3.876280 | -0.017790 |
| H | -5.574582 | -1.418541 | -2.561777 |
| H | -6.565270 | -1.376256 | -1.248610 |
| H | -5.829808 | -0.000663 | -1.773183 |
| H | 0.325063  | 5.494385  | -1.692883 |
| H | 0.919106  | 5.418408  | -0.163347 |
| H | 1.352610  | 4.266726  | -1.277131 |
| H | -2.299408 | 5.659737  | -1.325057 |
| H | -1.851928 | 4.671354  | -2.561131 |
| H | -3.152552 | 4.286765  | -1.639442 |
| H | 4.840255  | 2.829496  | 1.732441  |
| H | 6.213749  | 2.583973  | 0.866073  |
| H | 5.042895  | 3.582074  | 0.285694  |
| H | 5.906694  | -0.024376 | -1.854001 |
| H | 6.458795  | 1.501048  | -1.584662 |
| H | 6.735212  | 0.316877  | -0.476469 |
| H | 3.352486  | -4.467483 | -0.935684 |
| H | 3.129621  | -5.465191 | 0.352520  |
| H | 2.252128  | -5.687309 | -1.022669 |
| H | 0.127935  | -5.977223 | 0.997426  |
| H | 1.222070  | -5.553641 | 2.152096  |
| H | -0.265041 | -4.854759 | 2.132687  |
| N | -4.346840 | -3.413779 | -0.786693 |
| N | -5.701556 | -1.002560 | -1.640161 |
| N | 2.650213  | -4.981594 | -0.405594 |
| N | 0.490511  | -5.195707 | 1.540495  |
| N | 6.049361  | 0.683812  | -1.134835 |
| N | 5.205901  | 2.711514  | 0.788463  |
| N | 0.589266  | 4.856023  | -0.944785 |
| N | -2.214741 | 4.684421  | -1.608444 |
| N | 0.547197  | -2.897750 | -2.649863 |
| N | -3.402664 | 4.374157  | 1.365389  |
| N | -0.771648 | 2.876906  | 2.759686  |



|   |           |           |           |
|---|-----------|-----------|-----------|
| N | 1.106860  | -1.708552 | 2.702403  |
| H | 1.925789  | -1.982147 | 2.162849  |
| H | 1.252285  | -1.124819 | 3.510358  |
| H | -1.482049 | 3.409034  | 2.285809  |
| H | -0.858726 | 2.750569  | 3.753852  |
| H | -2.586972 | 4.914387  | 1.112574  |
| H | -4.133486 | 4.834787  | 1.882898  |
| H | 0.227412  | -2.798782 | -3.599413 |
| H | -0.059939 | -3.364714 | -1.983162 |

**Pt-C-Ic (M11L, SMD water)**

|    |           |           |           |
|----|-----------|-----------|-----------|
| Pt | -0.664394 | -3.709687 | 0.598149  |
| Pt | 4.438714  | -0.784747 | 0.039319  |
| Pt | 0.670720  | 3.710307  | -0.590698 |
| Pt | -4.439156 | 0.784240  | -0.048546 |
| C  | 3.444961  | 2.536211  | 2.481923  |
| C  | 1.589034  | -2.331380 | -2.748941 |
| C  | 0.682408  | -2.906948 | -1.911174 |
| H  | -0.155079 | -3.474090 | -2.308774 |
| C  | -0.682809 | 2.899700  | 1.911077  |
| C  | -3.452242 | -2.552244 | -2.468771 |
| H  | 0.157212  | 3.460650  | 2.311836  |
| C  | -1.596238 | 2.331041  | 2.745370  |
| C  | -3.852202 | -1.344711 | -1.980642 |
| H  | -4.474416 | -0.682419 | -2.581032 |
| H  | -3.764343 | -2.906232 | -3.444337 |
| H  | -1.503769 | 2.397089  | 3.823128  |
| H  | 1.492201  | -2.396420 | -3.826348 |
| N  | -2.775309 | 1.597677  | 0.809653  |
| N  | -0.763024 | 2.819883  | 0.567434  |
| N  | -3.527405 | -0.904286 | -0.746852 |
| N  | -2.160850 | -2.823047 | -0.485953 |
| N  | 0.764735  | -2.823050 | -0.568152 |
| N  | 2.770372  | -1.592698 | -0.817596 |
| N  | 2.163129  | 2.818645  | 0.494534  |
| N  | 3.527646  | 0.898115  | 0.751292  |
| C  | 3.845744  | 1.330601  | 1.989487  |
| H  | 4.463349  | 0.664029  | 2.589854  |
| H  | 3.752317  | 2.884549  | 3.460994  |
| C  | -2.618231 | -3.330972 | -1.649654 |
| C  | 2.658519  | -1.637397 | -2.162480 |
| C  | 2.616237  | 3.320323  | 1.662649  |
| C  | -2.671373 | 1.647663  | 2.155870  |
| C  | -2.669024 | -1.649129 | 0.018884  |
| O  | -2.346425 | -1.286544 | 1.177153  |
| C  | 1.818044  | -2.147404 | -0.011286 |
| O  | 1.925492  | -2.047764 | 1.245086  |
| C  | 2.673278  | 1.647669  | -0.014555 |
| O  | 2.356642  | 1.291645  | -1.176568 |
| C  | -1.818517 | 2.150697  | 0.006982  |
| O  | -1.923493 | 2.055437  | -1.249976 |
| N  | -2.131676 | -4.584239 | 1.746864  |
| H  | -1.775948 | -5.239893 | 2.440221  |
| H  | -2.647310 | -3.856857 | 2.240689  |
| N  | 0.835457  | -4.608837 | 1.685043  |
| H  | 0.527338  | -4.955278 | 2.591850  |
| H  | 1.242582  | -5.390394 | 1.176219  |
| N  | -6.220691 | 0.064426  | -0.804458 |
| H  | -7.002393 | 0.334156  | -0.208220 |
| H  | -6.404565 | 0.439847  | -1.734385 |

|   |           |           |           |
|---|-----------|-----------|-----------|
| N | -5.429551 | 2.479375  | 0.577358  |
| H | -4.769718 | 3.214411  | 0.828881  |
| H | -6.033979 | 2.848797  | -0.154969 |
| N | -0.824281 | 4.615164  | -1.679536 |
| H | -1.232818 | 5.394789  | -1.168846 |
| H | -0.511894 | 4.965565  | -2.583406 |
| N | 2.143200  | 4.590218  | -1.728696 |
| H | 2.661226  | 3.865412  | -2.223763 |
| H | 1.790532  | 5.249303  | -2.420356 |
| N | 6.214835  | -0.066345 | 0.806661  |
| H | 6.390260  | -0.440289 | 1.738883  |
| N | 7.004840  | -0.332048 | 0.219529  |
| H | 5.408430  | -2.483577 | -0.613936 |
| H | 6.400084  | -2.493420 | -0.379573 |
| H | 4.985525  | -3.308480 | -0.190795 |
| H | 5.334554  | -2.584150 | -1.625676 |
| H | 6.224944  | 0.950581  | 0.874011  |
| H | -1.542006 | 3.903720  | -1.836412 |
| H | 2.801402  | 5.090227  | -1.133672 |
| H | -6.234225 | -0.952401 | -0.872178 |
| H | -6.011603 | 2.291001  | 1.392250  |
| H | -2.792714 | -5.087237 | 1.157508  |
| H | 1.553062  | -3.895924 | 1.835944  |
| N | 3.595586  | -1.050189 | -2.898802 |
| N | -2.239323 | -4.556159 | -1.996110 |
| N | -3.616943 | 1.075761  | 2.890398  |
| N | 2.237159  | 4.544272  | 2.013257  |
| H | 4.261702  | -0.422053 | -2.474363 |
| H | 3.525402  | -1.066802 | -3.902497 |
| H | -1.667724 | -5.112763 | -1.376740 |
| H | -2.550370 | -4.959128 | -2.864061 |
| H | -3.555362 | 1.098797  | 3.894385  |
| H | -4.314314 | 0.485143  | 2.463374  |
| H | 2.544188  | 4.942670  | 2.884728  |
| H | 1.669119  | 5.104497  | 1.393812  |

**Pt-C-IIc1 (M11L, SMD water)**

|    |           |           |           |
|----|-----------|-----------|-----------|
| Pt | -2.315767 | 3.252148  | 0.471950  |
| Pt | -3.400654 | -2.566770 | 0.167073  |
| Pt | 2.422013  | -3.186810 | -0.772168 |
| Pt | 3.519691  | 2.500538  | 0.099856  |
| C  | 0.006718  | -2.838587 | 2.710331  |
| C  | 1.005383  | -3.039566 | 1.807750  |
| H  | 0.183532  | -2.881869 | 3.778512  |
| H  | 2.012026  | -3.280795 | 2.139629  |
| N  | 0.817997  | -2.966147 | 0.474767  |
| C  | 4.433058  | -0.999793 | 2.333467  |
| C  | 4.143360  | 0.269273  | 1.928085  |
| H  | 4.901418  | -1.201265 | 3.289834  |
| H  | 4.341148  | 1.118874  | 2.579469  |
| N  | 3.618144  | 0.555004  | 0.718232  |
| N  | 3.427308  | -1.772373 | 0.317791  |
| H  | 2.580639  | 4.890984  | -0.329120 |
| H  | 4.192387  | 5.048360  | -0.046712 |
| H  | 3.662492  | 4.524451  | -1.511570 |
| H  | 5.953948  | 3.423923  | 0.275896  |
| H  | 5.428533  | 3.065941  | 1.789275  |
| H  | 5.972748  | 1.870526  | 0.797745  |
| H  | 3.903590  | -3.900784 | -2.834793 |
| H  | 4.401541  | -2.445221 | -2.253352 |

|   |           |           |           |
|---|-----------|-----------|-----------|
| H | 4.836138  | -3.833505 | -1.482426 |
| H | 1.316271  | -5.474142 | -1.351488 |
| H | 0.419046  | -4.216679 | -1.960973 |
| H | 1.755447  | -4.768220 | -2.771201 |
| H | -0.441875 | 4.491605  | 1.666713  |
| H | -1.229777 | 5.607166  | 0.724605  |
| H | -1.853030 | 5.191388  | 2.186699  |
| H | -3.651736 | 3.499149  | 2.681006  |
| H | -4.401261 | 4.416076  | 1.538873  |
| H | -4.632347 | 2.785406  | 1.572157  |
| H | -5.875904 | -1.840569 | -0.369623 |
| H | -5.500209 | -3.157927 | -1.285490 |
| H | -5.881280 | -3.333503 | 0.301956  |
| H | -3.977677 | -5.109025 | 0.261100  |
| H | -2.577537 | -4.866580 | 1.084205  |
| H | -4.020145 | -4.510136 | 1.793137  |
| N | -3.506507 | -4.483048 | 0.913198  |
| N | -5.390640 | -2.736644 | -0.363353 |
| N | -3.940388 | 3.522213  | 1.703481  |
| N | -1.358321 | 4.832998  | 1.371910  |
| N | 3.491726  | 4.470405  | -0.508188 |
| N | 5.437360  | 2.737265  | 0.824183  |
| N | 4.076917  | -3.372256 | -1.981717 |
| N | 1.364912  | -4.587319 | -1.848389 |
| N | -1.481549 | -2.581012 | 0.866028  |
| C | 3.282145  | -0.477176 | -0.116984 |
| O | 2.841858  | -0.259816 | -1.273115 |
| C | 0.467529  | 2.603784  | -2.787170 |
| C | -0.440602 | -2.724666 | -0.007165 |
| O | -0.649501 | -2.656743 | -1.251572 |
| C | -4.148635 | -0.488802 | -1.755351 |
| C | -4.564857 | 0.736197  | -2.183009 |
| H | -4.408416 | -1.387135 | -2.313008 |
| H | -5.190110 | 0.852806  | -3.059782 |
| N | -3.428875 | -0.675174 | -0.627499 |
| N | -3.285782 | 1.681084  | -0.414641 |
| C | -2.948635 | 0.425341  | 0.034712  |
| O | -2.213613 | 0.315539  | 1.046985  |
| C | 0.533055  | 2.710982  | -0.037731 |
| O | 0.563313  | 2.752976  | 1.225085  |
| N | -0.645258 | 2.965096  | -0.701195 |
| N | 1.664018  | 2.433628  | -0.744885 |
| H | 0.439224  | 2.566837  | -3.869880 |
| C | 4.086804  | -2.047441 | 1.462865  |
| C | -1.276616 | -2.584155 | 2.202274  |
| C | -4.176239 | 1.844595  | -1.414733 |
| C | 1.606192  | 2.349156  | -2.087997 |
| N | 4.361914  | -3.315127 | 1.749013  |
| N | -2.313639 | -2.385221 | 3.006758  |
| N | -4.638636 | 3.067574  | -1.663795 |
| H | -3.214020 | -2.118410 | 2.638188  |
| H | -2.183703 | -2.394029 | 4.004596  |
| H | -5.305693 | 3.211394  | -2.403952 |
| H | -4.444772 | 3.839331  | -1.042381 |
| H | 4.119088  | -4.057545 | 1.110576  |
| H | 4.837314  | -3.549750 | 2.604037  |
| C | -0.671770 | 2.980233  | -2.053910 |
| H | 2.535006  | 2.088601  | -2.589699 |
| N | -1.776205 | 3.366468  | -2.675071 |
| H | -1.814061 | 3.360777  | -3.680257 |

|                                   |           |           |           |
|-----------------------------------|-----------|-----------|-----------|
| H                                 | -2.579310 | 3.709433  | -2.174071 |
| <b>Pt-C-Hc2 (M11L, SMD water)</b> |           |           |           |
| Pt                                | 0.289000  | 3.658901  | 0.628936  |
| Pt                                | -4.508493 | 0.267702  | -0.125983 |
| Pt                                | -0.299400 | -3.783276 | -0.420780 |
| Pt                                | 4.528947  | -0.418483 | -0.163675 |
| C                                 | -2.652282 | -2.242177 | 2.809800  |
| C                                 | -1.727356 | 2.115416  | -2.798922 |
| C                                 | -0.928183 | 2.788439  | -1.926211 |
| H                                 | -0.142653 | 3.442810  | -2.293968 |
| C                                 | 3.126785  | 2.820454  | -2.489763 |
| C                                 | 2.287147  | -2.567299 | 2.755439  |
| C                                 | 3.625235  | 1.634072  | -2.043088 |
| H                                 | 4.275070  | 1.033867  | -2.678445 |
| H                                 | 3.388291  | 3.222644  | -3.461277 |
| H                                 | 2.375093  | -2.765968 | 3.816892  |
| H                                 | -1.586938 | 2.187017  | -3.870999 |
| N                                 | 3.058475  | -1.472924 | 0.782955  |
| N                                 | 1.223679  | -2.960795 | 0.663237  |
| N                                 | 3.372477  | 1.141289  | -0.811460 |
| N                                 | 1.854631  | 2.931349  | -0.479963 |
| N                                 | -1.058407 | 2.702442  | -0.586586 |
| N                                 | -2.915995 | 1.268540  | -0.917023 |
| N                                 | -1.716604 | -2.820423 | 0.698749  |
| N                                 | -3.317411 | -1.079447 | 0.839030  |
| H                                 | -2.731713 | -2.404661 | 3.878232  |
| C                                 | 2.264614  | 3.516520  | -1.625860 |
| C                                 | -2.736996 | 1.304980  | -2.256527 |
| C                                 | -1.849868 | -3.014633 | 2.024293  |
| C                                 | 1.374726  | -3.213475 | 1.977275  |
| C                                 | -2.074945 | 1.941451  | -0.071990 |
| O                                 | -2.254803 | 1.868564  | 1.175383  |
| C                                 | 2.459553  | 1.784655  | -0.017703 |
| O                                 | 2.169772  | 1.355772  | 1.127137  |
| C                                 | 2.099332  | -2.107647 | 0.045372  |
| O                                 | 2.035589  | -1.924571 | -1.202979 |
| C                                 | -2.510659 | -1.888932 | 0.084434  |
| O                                 | -2.514901 | -1.786695 | -1.171776 |
| N                                 | 1.681538  | 4.605127  | 1.812080  |
| H                                 | 1.293640  | 4.989198  | 2.672554  |
| H                                 | 2.415929  | 3.948405  | 2.071907  |
| N                                 | -1.264660 | 4.414111  | 1.748151  |
| H                                 | -0.983206 | 4.711669  | 2.680427  |
| H                                 | -1.699716 | 5.210009  | 1.286666  |
| N                                 | -5.770439 | 1.613698  | -1.049705 |
| H                                 | -6.315777 | 1.163231  | -1.783502 |
| H                                 | -6.425674 | 2.007458  | -0.375388 |
| N                                 | -6.173627 | -0.721099 | 0.583381  |
| H                                 | -6.728210 | -0.126756 | 1.198654  |
| H                                 | -6.769431 | -1.000914 | -0.194806 |
| N                                 | -1.834558 | -4.577965 | -1.538235 |
| H                                 | -2.459565 | -3.799278 | -1.753386 |
| H                                 | -1.526070 | -4.993602 | -2.414893 |
| N                                 | 1.143811  | -4.713608 | -1.556164 |
| H                                 | 1.618330  | -5.443598 | -1.028685 |
| H                                 | 0.784010  | -5.135055 | -2.410657 |
| N                                 | 6.161861  | 0.541304  | -0.990346 |
| H                                 | 6.067204  | 1.555654  | -0.961710 |

|   |           |           |           |
|---|-----------|-----------|-----------|
| H | 7.012208  | 0.307981  | -0.478426 |
| N | 5.784472  | -1.957043 | 0.387769  |
| H | 5.255967  | -2.787843 | 0.651360  |
| H | 6.398535  | -2.220740 | -0.381759 |
| H | -5.266437 | 2.391002  | -1.474822 |
| H | 2.118347  | 5.372544  | 1.303601  |
| H | -1.950217 | 3.660908  | 1.838458  |
| H | 6.309699  | 0.269106  | -1.961630 |
| H | 6.371524  | -1.696386 | 1.179005  |
| H | -2.352858 | -5.286669 | -1.023774 |
| H | 1.826909  | -3.999859 | -1.814224 |
| H | -5.937187 | -1.565214 | 1.102932  |
| C | 3.118884  | -1.628283 | 2.124973  |
| H | 0.733535  | -3.982140 | 2.399367  |
| C | -3.356717 | -1.200393 | 2.185019  |
| H | -1.287941 | -3.839760 | 2.452435  |
| N | -3.547791 | 0.591705  | -3.028168 |
| N | 1.812208  | 4.731113  | -1.916960 |
| N | 4.004452  | -0.911329 | 2.807400  |
| N | -4.091660 | -0.341254 | 2.882253  |
| H | 1.216819  | 5.230013  | -1.272401 |
| H | 2.084181  | 5.182600  | -2.774058 |
| H | -4.167361 | -0.096525 | -2.628208 |
| H | -3.431220 | 0.607874  | -4.027608 |
| H | -4.137041 | -0.419616 | 3.884369  |
| H | -4.492457 | 0.476512  | 2.448370  |
| H | 4.532643  | -0.177695 | 2.358175  |
| H | 4.083453  | -1.023047 | 3.804198  |

**Pt-C-IIIc1 (M11L, SMD water)**

|    |           |           |           |
|----|-----------|-----------|-----------|
| Pt | -0.451246 | -3.843208 | -0.765653 |
| Pt | -4.472826 | 0.327281  | 0.055451  |
| Pt | 0.320096  | 3.729279  | 0.488355  |
| Pt | 4.419207  | -0.586030 | 0.104143  |
| C  | -2.097819 | 2.256355  | -2.829500 |
| H  | -2.134744 | 2.357311  | -3.907923 |
| N  | -1.073379 | 2.811397  | -0.735924 |
| C  | 3.493821  | 2.762347  | -2.259522 |
| H  | 3.932990  | 3.186658  | -3.154776 |
| N  | 3.362794  | 0.999945  | -0.658413 |
| N  | 1.954107  | 2.897708  | -0.449165 |
| H  | 6.169345  | -1.861500 | 1.571963  |
| H  | 5.086934  | -2.957221 | 0.990254  |
| H  | 6.281892  | -2.394322 | 0.018641  |
| H  | 6.895574  | 0.204142  | 0.213253  |
| H  | 6.453620  | 0.171268  | -1.368269 |
| H  | 6.016672  | 1.439056  | -0.410268 |
| H  | 1.213110  | 5.018736  | 2.602008  |
| H  | 2.300518  | 3.877410  | 2.139244  |
| H  | 2.217793  | 5.310787  | 1.336414  |
| H  | -1.825711 | 5.169231  | 0.794434  |
| H  | -1.878889 | 3.829949  | 1.766406  |
| H  | -1.034258 | 5.176519  | 2.234545  |
| H  | 1.675681  | -3.903282 | -2.150464 |
| H  | 1.452814  | -5.435538 | -1.558846 |
| H  | 0.636032  | -4.954419 | -2.902437 |
| H  | -1.696562 | -4.771311 | -2.898547 |
| H  | -2.543137 | -5.190553 | -1.551340 |
| H  | -2.593350 | -3.628282 | -2.104379 |
| H  | -6.519474 | -0.194205 | 1.599394  |

|   |           |           |           |
|---|-----------|-----------|-----------|
| H | -6.826193 | -0.784752 | 0.095889  |
| H | -5.864404 | -1.625931 | 1.124183  |
| H | -6.535430 | 1.940312  | -0.112461 |
| H | -5.266020 | 2.627278  | -0.894254 |
| H | -6.127074 | 1.426536  | -1.620211 |
| N | -5.747935 | 1.745138  | -0.729104 |
| N | -6.104762 | -0.686944 | 0.809645  |
| N | -1.996451 | -4.447656 | -1.980964 |
| N | 0.987837  | -4.643865 | -1.998568 |
| N | 5.625653  | -2.125831 | 0.750987  |
| N | 6.139030  | 0.427368  | -0.432996 |
| N | 1.660202  | 4.590643  | 1.792928  |
| N | -1.286436 | 4.593832  | 1.438229  |
| N | -2.948776 | 1.360014  | -0.805181 |
| C | 1.979971  | -2.989574 | 2.627336  |
| C | -2.658946 | -2.544388 | 2.654177  |
| H | -2.726440 | -2.813590 | 3.701565  |
| N | -3.275494 | -1.128322 | 0.838277  |
| N | -1.844931 | -2.975968 | 0.458826  |
| N | 1.069466  | -3.199801 | 0.439501  |
| N | 2.866448  | -1.710028 | 0.818800  |
| H | 2.003076  | -3.284144 | 3.670116  |
| C | 3.824792  | 1.517590  | -1.817197 |
| C | -1.968404 | -3.305218 | 1.758970  |
| C | 1.144828  | -3.580550 | 1.728690  |
| C | -2.969516 | 1.467532  | -2.148509 |
| H | 0.505184  | -4.406776 | 2.025412  |
| H | -1.490700 | -4.229558 | 2.070773  |
| H | -3.741689 | 0.896619  | -2.662420 |
| H | 4.513861  | 0.893574  | -2.383574 |
| C | -2.577813 | -1.926034 | -0.028520 |
| O | -2.628015 | -1.708524 | -1.269748 |
| C | -1.977916 | 1.997065  | -0.090820 |
| O | -1.912458 | 1.860740  | 1.163115  |
| C | 2.376152  | 1.670310  | 0.015999  |
| O | 1.853730  | 1.195682  | 1.055826  |
| C | 1.975890  | -2.291125 | -0.039703 |
| O | 2.002553  | -2.007572 | -1.269308 |
| C | 2.599341  | 3.502048  | -1.469725 |
| C | -1.157992 | 2.984205  | -2.075691 |
| N | 2.350749  | 4.785570  | -1.728342 |
| N | -0.352367 | 3.848314  | -2.671248 |
| H | 2.829750  | 5.238173  | -2.490302 |
| H | 1.860156  | 5.372598  | -1.069711 |
| H | -0.401869 | 3.972488  | -3.668516 |
| H | 0.310411  | 4.407694  | -2.160481 |
| C | 2.817242  | -1.969113 | 2.146847  |
| C | -3.265490 | -1.374325 | 2.168323  |
| N | 3.606547  | -1.275871 | 2.958663  |
| N | -3.869102 | -0.511382 | 2.976822  |
| H | -4.229565 | 0.363998  | 2.627087  |
| H | -3.883685 | -0.675506 | 3.969451  |
| H | 4.155129  | -0.501122 | 2.616502  |
| H | 3.602899  | -1.464551 | 3.947227  |

**Pt-C-IIIc2 (M11L, SMD water)**

|    |           |           |           |
|----|-----------|-----------|-----------|
| Pt | 0.016757  | -3.740766 | -0.446566 |
| Pt | 4.525452  | 0.024335  | -0.171945 |
| Pt | -0.022127 | 3.648735  | 0.752499  |
| Pt | -4.626773 | -0.032213 | -0.174370 |

|   |           |           |           |
|---|-----------|-----------|-----------|
| C | -3.601762 | -1.769054 | 1.898985  |
| C | -2.944675 | 3.166668  | -2.348734 |
| H | -4.385380 | -1.212799 | 2.412263  |
| C | -2.971880 | -2.811789 | 2.508254  |
| C | 1.130956  | 2.863625  | -1.868704 |
| C | 2.161826  | -1.964632 | 2.798628  |
| H | 0.366469  | 3.560508  | -2.200447 |
| C | 1.884693  | 2.186105  | -2.777981 |
| H | 2.111752  | -2.006882 | 3.880165  |
| H | 1.729272  | 2.301863  | -3.844217 |
| H | -3.238793 | -3.139601 | 3.505946  |
| N | 3.059439  | 1.212576  | -0.950615 |
| N | 1.283415  | 2.728139  | -0.535881 |
| N | 3.147275  | -1.119769 | 0.801861  |
| N | 1.339977  | -2.644631 | 0.667616  |
| N | -1.598268 | -2.989445 | 0.567696  |
| N | -3.330478 | -1.381035 | 0.636449  |
| N | -1.628255 | 3.038055  | -0.367727 |
| N | -3.296181 | 1.406484  | -0.775230 |
| H | -3.193034 | 3.652181  | -3.284814 |
| C | 1.314244  | -2.687711 | 2.014935  |
| C | -1.983029 | -3.479812 | 1.766731  |
| C | -3.536524 | 2.002170  | -1.963195 |
| C | 2.856551  | 1.301913  | -2.283374 |
| C | -2.294430 | -1.966985 | -0.032765 |
| O | -1.978737 | -1.598586 | -1.195209 |
| C | 2.274112  | -1.857334 | 0.049128  |
| O | 2.348238  | -1.819430 | -1.209886 |
| C | 2.281008  | 1.913754  | -0.067886 |
| O | 2.499891  | 1.812752  | 1.169349  |
| C | -2.302368 | 1.904370  | 0.025050  |
| O | -2.003978 | 1.353018  | 1.115093  |
| N | -1.326917 | -4.843753 | -1.550679 |
| H | -2.119915 | -4.260096 | -1.814027 |
| H | -0.930021 | -5.226062 | -2.407903 |
| N | 1.624374  | -4.526622 | -1.462749 |
| H | 2.188098  | -5.114308 | -0.851609 |
| H | 1.368053  | -5.082774 | -2.276295 |
| N | -6.105100 | -1.380670 | 0.332574  |
| H | -6.583220 | -1.099972 | 1.188003  |
| H | -6.807966 | -1.446292 | -0.403174 |
| N | -6.113063 | 1.240818  | -0.835102 |
| H | -6.344054 | 1.069956  | -1.813392 |
| H | -6.968255 | 1.108935  | -0.296287 |
| N | 1.561989  | 4.338163  | 1.869772  |
| H | 2.001505  | 5.137896  | 1.419121  |
| H | 1.303476  | 4.618030  | 2.813941  |
| N | -1.373934 | 4.549689  | 2.015369  |
| H | -2.070556 | 3.868409  | 2.313094  |
| H | -0.952616 | 4.945385  | 2.854194  |
| N | 6.030942  | -1.166435 | 0.583991  |
| H | 6.599708  | -0.663254 | 1.263230  |
| H | 5.662105  | -1.995877 | 1.045863  |
| N | 5.957562  | 1.187784  | -1.096483 |
| H | 6.404770  | 0.695789  | -1.869350 |
| H | 5.559622  | 2.048877  | -1.469362 |
| H | 6.648011  | -1.482816 | -0.162438 |
| H | -1.861872 | 5.303230  | 1.532986  |
| H | -5.851568 | 2.221433  | -0.743204 |
| H | -5.735784 | -2.319562 | 0.477262  |

|   |           |           |           |
|---|-----------|-----------|-----------|
| H | -1.684103 | -5.624001 | -1.002148 |
| H | 2.191505  | -3.732784 | -1.766519 |
| H | 6.689009  | 1.454061  | -0.438827 |
| H | 2.235979  | 3.572114  | 1.925862  |
| C | 3.096037  | -1.139715 | 2.152037  |
| H | 0.573305  | -3.345164 | 2.462486  |
| H | -4.257681 | 1.507097  | -2.610861 |
| C | -2.012114 | 3.729174  | -1.463350 |
| N | -1.404328 | -4.588985 | 2.214472  |
| N | 3.954026  | -0.392351 | 2.835742  |
| N | -1.465210 | 4.919251  | -1.684114 |
| N | 3.603983  | 0.564543  | -3.095622 |
| H | 4.503914  | 0.315534  | 2.373809  |
| H | 3.935460  | -0.400762 | 3.841439  |
| H | -0.730203 | -5.084676 | 1.649591  |
| H | -1.656940 | -4.966043 | 3.112401  |
| H | -1.715061 | 5.451403  | -2.501124 |
| H | -0.817960 | 5.319845  | -1.019826 |
| H | 3.464647  | 0.617786  | -4.090705 |
| H | 4.202199  | -0.162840 | -2.736042 |

**Pt-C-IVc1 (M11L, SMD water)**

|    |           |           |           |
|----|-----------|-----------|-----------|
| Pt | 3.987555  | -1.382922 | 0.631715  |
| Pt | 1.335468  | 3.864972  | 0.120043  |
| Pt | -3.982953 | 1.404093  | -0.631365 |
| Pt | -1.327924 | -3.867704 | -0.103598 |
| C  | 3.225189  | 2.619202  | -1.742372 |
| C  | -1.434377 | 2.183651  | 2.767753  |
| H  | 2.875686  | 3.458996  | -2.341195 |
| C  | 4.321217  | 1.903701  | -2.120914 |
| C  | 1.458233  | -2.251213 | -2.758600 |
| C  | -4.425508 | -1.944425 | 2.011875  |
| C  | 0.311714  | -2.604226 | -2.118314 |
| C  | -3.310654 | -2.649687 | 1.671069  |
| H  | -2.991906 | -3.500353 | 2.271148  |
| H  | -0.605053 | -2.810714 | -2.667385 |
| H  | 1.511832  | -2.169852 | -3.837925 |
| H  | -5.041764 | -2.223829 | 2.858876  |
| H  | 4.894648  | 2.161363  | -3.004183 |
| N  | -2.558020 | -2.372332 | 0.583725  |
| N  | -3.899755 | -0.446325 | 0.242089  |
| N  | 0.245311  | -2.760391 | -0.780968 |
| N  | 2.505332  | -2.076942 | -0.614899 |
| N  | 3.888087  | 0.447030  | -0.290212 |
| N  | 2.530995  | 2.365916  | -0.610502 |
| N  | -2.486534 | 2.042972  | 0.625163  |
| N  | -0.236661 | 2.757909  | 0.798422  |
| C  | -0.297815 | 2.577225  | 2.132812  |
| H  | 0.615039  | 2.793923  | 2.684393  |
| H  | -1.482049 | 2.076882  | 3.845151  |
| C  | 2.601778  | -2.049039 | -1.964252 |
| C  | 4.697463  | 0.826235  | -1.301337 |
| C  | -2.576209 | 1.971954  | 1.973182  |
| C  | -4.757340 | -0.845556 | 1.203755  |
| C  | 2.843568  | 1.245483  | 0.114083  |
| O  | 2.199210  | 0.931285  | 1.146520  |
| C  | -1.320328 | 2.462152  | 0.028439  |
| O  | -1.267310 | 2.585412  | -1.227746 |
| C  | -2.831501 | -1.231550 | -0.126406 |
| O  | -2.130751 | -0.885022 | -1.109778 |

|   |           |           |           |
|---|-----------|-----------|-----------|
| C | 1.331230  | -2.466093 | -0.013260 |
| O | 1.271953  | -2.566527 | 1.244812  |
| H | 4.872848  | -0.198858 | 2.740112  |
| H | 5.983028  | -1.350961 | 2.348477  |
| H | 5.960883  | 0.079200  | 1.542464  |
| H | 4.413041  | -3.939118 | 0.910768  |
| H | 4.564064  | -3.258392 | 2.400810  |
| H | 3.056582  | -3.465317 | 1.741850  |
| H | 2.912499  | 5.926275  | 0.309809  |
| H | 3.773132  | 4.723185  | -0.393260 |
| H | 2.702609  | 5.597569  | -1.286390 |
| H | -0.763376 | 5.277386  | 0.754490  |
| H | 0.439350  | 5.604326  | 1.826611  |
| H | 0.434070  | 6.326604  | 0.348400  |
| H | -4.564277 | 3.317044  | -2.352299 |
| H | -4.400010 | 3.969902  | -0.851190 |
| H | -3.051138 | 3.508702  | -1.702249 |
| H | -5.138744 | 0.890871  | -2.900674 |
| H | -5.594562 | -0.260386 | -1.820846 |
| H | -6.316098 | 1.219421  | -1.800289 |
| H | 0.795007  | -5.270653 | -0.688854 |
| H | -0.398172 | -6.322610 | -0.278713 |
| H | -0.392823 | -5.624542 | -1.768573 |
| N | 5.369106  | -0.634888 | 1.963797  |
| N | 4.029838  | -3.232073 | 1.533954  |
| N | 2.857902  | 5.171220  | -0.373098 |
| N | 0.236709  | 5.455384  | 0.838681  |
| N | -4.023014 | 3.273927  | -1.490581 |
| N | -5.428259 | 0.738292  | -1.935376 |
| N | -0.202746 | -5.457664 | -0.780911 |
| N | -2.839408 | -5.194768 | 0.372511  |
| H | -2.699290 | -5.608384 | 1.294211  |
| H | -3.764963 | -4.767782 | 0.362121  |
| H | -2.860210 | -5.958702 | -0.302332 |
| N | 5.822586  | 0.151606  | -1.512214 |
| N | 3.785071  | -1.841139 | -2.519405 |
| N | -5.881746 | -0.157726 | 1.380979  |
| N | -3.750307 | 1.717343  | 2.531203  |
| H | -6.528216 | -0.428049 | 2.103278  |
| H | -6.151025 | 0.585333  | 0.753958  |
| H | -3.825224 | 1.648353  | 3.532226  |
| H | -4.592671 | 1.625788  | 1.987292  |
| H | 6.133749  | -0.569359 | -0.879015 |
| H | 6.427041  | 0.406204  | -2.275319 |
| H | 4.622214  | -1.754541 | -1.967208 |
| H | 3.870735  | -1.792737 | -3.520695 |

**Pt-C-IVc2 (M11L, SMD water)**

|    |           |           |           |
|----|-----------|-----------|-----------|
| Pt | -3.749768 | 0.466755  | -0.003601 |
| Pt | 0.002935  | -0.005786 | 4.521788  |
| Pt | 3.749768  | -0.466755 | 0.003601  |
| Pt | -0.002935 | 0.005786  | -4.521788 |
| C  | 2.373443  | 2.821295  | 2.372254  |
| C  | -2.452029 | -2.794687 | 2.421530  |
| C  | -2.373443 | -2.821295 | -2.372254 |
| C  | 2.452029  | 2.794687  | -2.421530 |
| H  | -2.556846 | -3.888000 | -2.422315 |
| H  | 2.663846  | 3.854877  | -2.494448 |
| H  | -2.663846 | -3.854877 | 2.494448  |
| N  | 1.234471  | 0.874628  | -3.145841 |

|   |           |           |           |
|---|-----------|-----------|-----------|
| N | 2.903401  | 0.656795  | -1.480209 |
| N | -1.219516 | -0.881452 | -3.140552 |
| N | -2.873424 | -0.681614 | -1.455597 |
| N | -2.903401 | -0.656795 | 1.480209  |
| N | -1.234471 | -0.874628 | 3.145841  |
| N | 2.873424  | 0.681614  | 1.455597  |
| N | 1.219516  | 0.881452  | 3.140552  |
| H | 2.556846  | 3.888000  | 2.422315  |
| C | -3.103624 | -2.004297 | -1.562741 |
| C | -3.176092 | -1.968750 | 1.615725  |
| C | 3.103624  | 2.004297  | 1.562741  |
| C | 3.176092  | 1.968750  | -1.615725 |
| C | -1.971891 | -0.083454 | 2.304716  |
| O | -1.808274 | 1.166777  | 2.304024  |
| C | 1.960365  | 0.098652  | 2.295006  |
| O | 1.813872  | -1.154098 | 2.304745  |
| C | 1.971891  | 0.083454  | -2.304716 |
| O | 1.808274  | -1.166777 | -2.304024 |
| C | -1.960365 | -0.098652 | -2.295006 |
| O | -1.813872 | 1.154098  | -2.304745 |
| H | -3.803363 | 1.834259  | 2.132908  |
| H | -4.935272 | 2.527865  | 1.143208  |
| H | -5.309980 | 1.156552  | 1.973385  |
| H | -5.269569 | 1.079969  | -2.033820 |
| H | -4.995175 | 2.465941  | -1.194385 |
| H | -3.794685 | 1.830884  | -2.144348 |
| H | -1.441476 | -0.098407 | 6.682390  |
| H | -2.043419 | -1.210803 | 5.638223  |
| H | -0.692755 | -1.554647 | 6.511092  |
| H | 2.055730  | 1.202477  | 5.619050  |
| H | 0.719150  | 1.514752  | 6.524810  |
| H | 1.487932  | 0.064866  | 6.655072  |
| H | 4.995175  | -2.465941 | 1.194385  |
| H | 5.269569  | -1.079969 | 2.033820  |
| H | 3.794685  | -1.830884 | 2.144348  |
| H | 4.935272  | -2.527865 | -1.143208 |
| H | 3.803363  | -1.834259 | -2.132908 |
| H | 5.309980  | -1.156552 | -1.973385 |
| H | -2.055730 | -1.202477 | -5.619050 |
| H | -1.487932 | -0.064866 | -6.655072 |
| H | -0.719150 | -1.514752 | -6.524810 |
| N | -4.563688 | 1.640621  | 1.478172  |
| N | -4.565659 | 1.600519  | -1.514835 |
| N | -1.179553 | -0.814750 | 6.006417  |
| N | 1.204361  | 0.789983  | 5.997524  |
| N | 4.565659  | -1.600519 | 1.514835  |
| N | 4.563688  | -1.640621 | -1.478172 |
| N | -1.204361 | -0.789983 | -5.997524 |
| N | 1.179553  | 0.814750  | -6.006417 |
| H | 0.692755  | 1.554647  | -6.511092 |
| H | 2.043419  | 1.210803  | -5.638223 |
| H | 1.441476  | 0.098407  | -6.682390 |
| C | -1.354595 | -2.227965 | -3.134091 |
| C | -1.397795 | -2.218583 | 3.148874  |
| H | -4.023476 | -2.345035 | 1.049358  |
| H | -3.920838 | -2.404351 | -0.970222 |
| H | 4.023476  | 2.345035  | -1.049358 |
| H | 1.397795  | 2.218583  | -3.148874 |
| C | 3.920838  | 2.404351  | 0.970222  |
| C | 1.354595  | 2.227965  | 3.134091  |

|   |           |           |           |
|---|-----------|-----------|-----------|
| N | -0.537389 | -2.953321 | -3.887629 |
| N | -0.574140 | -2.957607 | 3.881603  |
| N | 0.537389  | 2.953321  | 3.887629  |
| N | 0.574140  | 2.957607  | -3.881603 |
| H | 0.258737  | -2.534483 | -4.344288 |
| H | -0.630731 | -3.955000 | -3.909302 |
| H | 0.689733  | 3.956738  | -3.912635 |
| H | -0.240532 | 2.553637  | -4.318778 |
| H | 0.240532  | -2.553637 | 4.318778  |
| H | -0.689733 | -3.956738 | 3.912635  |
| H | -0.258737 | 2.534483  | 4.344288  |
| H | 0.630731  | 3.955000  | 3.909302  |

**Pt-C-Id (M11L, SMD water)**

|    |           |           |           |
|----|-----------|-----------|-----------|
| Pt | -1.797384 | 3.645362  | -0.356066 |
| Pt | 3.645362  | 1.797384  | 0.356066  |
| Pt | -3.645362 | -1.797384 | 0.356066  |
| Pt | 1.797384  | -3.645362 | -0.356066 |
| C  | -0.153539 | -1.681699 | 2.879837  |
| C  | 0.736174  | -2.353100 | 2.093333  |
| H  | 0.130808  | -1.275478 | 3.843669  |
| H  | 1.768621  | -2.502329 | 2.401748  |
| N  | 0.398601  | -2.868473 | 0.896509  |
| N  | -1.797384 | -2.044740 | 1.187986  |
| C  | 0.153539  | 1.681699  | 2.879837  |
| C  | -0.736174 | 2.353100  | 2.093333  |
| H  | -0.130808 | 1.275478  | 3.843669  |
| H  | -1.768621 | 2.502329  | 2.401748  |
| N  | -0.398601 | 2.868473  | 0.896509  |
| N  | 1.797384  | 2.044740  | 1.187986  |
| C  | -1.681699 | 0.153539  | -2.879837 |
| C  | 1.681699  | -0.153539 | -2.879837 |
| N  | 2.868473  | 0.398601  | -0.896509 |
| N  | 2.044740  | -1.797384 | -1.187986 |
| C  | 2.353100  | 0.736174  | -2.093333 |
| H  | 1.275478  | 0.130808  | -3.843669 |
| H  | 2.502329  | 1.768621  | -2.401748 |
| H  | -1.275478 | -0.130808 | -3.843669 |
| C  | -2.353100 | -0.736174 | -2.093333 |
| N  | -2.868473 | -0.398601 | -0.896509 |
| N  | -2.044740 | 1.797384  | -1.187986 |
| H  | -2.502329 | -1.768621 | -2.401748 |
| C  | 1.451284  | 1.491403  | 2.371341  |
| C  | 1.491403  | -1.451284 | -2.371341 |
| C  | -1.451284 | -1.491403 | 2.371341  |
| C  | -1.491403 | 1.451284  | -2.371341 |
| C  | 0.890641  | 2.763585  | 0.455039  |
| O  | 1.249893  | 3.323248  | -0.615820 |
| C  | 2.763585  | -0.890641 | -0.455039 |
| O  | 3.323248  | -1.249893 | 0.615820  |
| C  | -0.890641 | -2.763585 | 0.455039  |
| O  | -1.249893 | -3.323248 | -0.615820 |
| C  | -2.763585 | 0.890641  | -0.455039 |
| O  | -3.323248 | 1.249893  | 0.615820  |
| N  | -5.490446 | -1.518853 | -0.515492 |
| H  | -5.437013 | -1.701882 | -1.516191 |
| H  | -6.218098 | -2.119213 | -0.131762 |
| N  | -4.398498 | -3.225305 | 1.637237  |
| H  | -4.876948 | -2.792106 | 2.425634  |
| H  | -5.063780 | -3.843635 | 1.175774  |

|   |           |           |           |
|---|-----------|-----------|-----------|
| N | -3.225305 | 4.398498  | -1.637237 |
| H | -3.843635 | 5.063780  | -1.175774 |
| H | -2.792106 | 4.876948  | -2.425634 |
| N | -1.518853 | 5.490446  | 0.515492  |
| H | -2.119213 | 6.218098  | 0.131762  |
| H | -1.701882 | 5.437013  | 1.516191  |
| N | 4.398498  | 3.225305  | 1.637237  |
| H | 4.876948  | 2.792106  | 2.425634  |
| H | 5.063780  | 3.843635  | 1.175774  |
| N | 5.490446  | 1.518853  | -0.515492 |
| H | 5.437013  | 1.701882  | -1.516191 |
| H | 6.218098  | 2.119213  | -0.131762 |
| N | 1.518853  | -5.490446 | 0.515492  |
| H | 0.553057  | -5.789145 | 0.393591  |
| H | 2.119213  | -6.218098 | 0.131762  |
| N | 3.225305  | -4.398498 | -1.637237 |
| H | 3.805285  | -3.649078 | -2.010532 |
| H | 3.843635  | -5.063780 | -1.175774 |
| H | 3.649078  | 3.805285  | 2.010532  |
| H | 5.789145  | 0.553057  | -0.393591 |
| H | 1.701882  | -5.437013 | 1.516191  |
| H | 2.792106  | -4.876948 | -2.425634 |
| H | -3.649078 | -3.805285 | 2.010532  |
| H | -5.789145 | -0.553057 | -0.393591 |
| H | -3.805285 | 3.649078  | -2.010532 |
| H | -0.553057 | 5.789145  | 0.393591  |
| N | -2.367614 | -0.788186 | 3.026015  |
| N | -0.788186 | 2.367614  | -3.026015 |
| N | 2.367614  | 0.788186  | 3.026015  |
| N | 0.788186  | -2.367614 | -3.026015 |
| H | 3.251385  | 0.571527  | 2.588859  |
| H | 2.127787  | 0.322393  | 3.884894  |
| H | -0.322393 | 2.127787  | -3.884894 |
| H | -0.571527 | 3.251385  | -2.588859 |
| H | -2.127787 | -0.322393 | 3.884894  |
| H | -3.251385 | -0.571527 | 2.588859  |
| H | 0.571527  | -3.251385 | -2.588859 |
| H | 0.322393  | -2.127787 | -3.884894 |

**Pt-C-IId (M11L, SMD water)**

|    |           |           |           |
|----|-----------|-----------|-----------|
| Pt | 4.555185  | 0.036854  | 0.060639  |
| Pt | 0.043530  | 3.690143  | 0.093946  |
| Pt | -4.428532 | 0.022654  | -0.140103 |
| Pt | 0.066385  | -3.628655 | -0.020379 |
| C  | -1.422093 | -0.912941 | -2.997390 |
| C  | -2.569241 | -0.489709 | -2.391660 |
| H  | -1.131150 | -0.553508 | -3.977938 |
| H  | -3.234412 | 0.225144  | -2.872790 |
| N  | -2.940822 | -0.907428 | -1.165597 |
| N  | -0.995892 | -2.240520 | -1.065901 |
| C  | 1.689681  | 1.090959  | -2.911787 |
| C  | 2.801262  | 0.639675  | -2.260000 |
| H  | 1.472182  | 0.801140  | -3.933884 |
| H  | 3.513160  | -0.024884 | -2.747279 |
| N  | 3.077712  | 0.965615  | -0.983548 |
| N  | 1.110232  | 2.276988  | -0.925466 |
| C  | 1.541699  | -0.865104 | 2.916721  |
| C  | -1.633368 | 1.059893  | 2.989620  |
| N  | -1.094326 | 2.306120  | 1.042274  |
| N  | -2.971680 | 0.866892  | 1.020916  |

|   |           |           |           |
|---|-----------|-----------|-----------|
| C | -0.835841 | 1.932148  | 2.309682  |
| H | -1.423043 | 0.772281  | 4.013896  |
| H | 0.044934  | 2.376456  | 2.771018  |
| H | 1.251382  | -0.503582 | 3.896571  |
| N | 1.113396  | -2.201943 | 0.989330  |
| N | 3.075130  | -0.892770 | 1.098105  |
| C | 2.706022  | -0.471312 | 2.323051  |
| H | 3.387042  | 0.221281  | 2.812930  |
| C | 0.794675  | 1.897505  | -2.184847 |
| C | -2.726195 | 0.501970  | 2.298829  |
| C | -0.583021 | -1.772650 | -2.266364 |
| C | 0.698247  | -1.720315 | 2.184364  |
| C | 2.293761  | -1.794143 | 0.436640  |
| O | 2.659971  | -2.263687 | -0.679347 |
| C | 2.244965  | 1.818955  | -0.313212 |
| O | 2.523442  | 2.196576  | 0.857054  |
| C | -2.187827 | 1.802980  | 0.400410  |
| O | -2.487354 | 2.204631  | -0.758679 |
| C | -2.175698 | -1.830311 | -0.514736 |
| O | -2.554998 | -2.312971 | 0.589603  |
| N | 5.993423  | -0.965507 | 1.143816  |
| H | 6.926577  | -0.901048 | 0.740239  |
| H | 6.042770  | -0.596770 | 2.092077  |
| N | 5.989873  | 1.036547  | -1.029254 |
| H | 6.923319  | 0.976065  | -0.625628 |
| H | 6.039981  | 0.660606  | -1.974742 |
| N | -1.009783 | -5.069956 | -1.024433 |
| H | -0.783778 | -6.024875 | -0.750792 |
| H | -2.004431 | -4.928130 | -0.854332 |
| N | 1.149829  | -5.031845 | 1.028884  |
| H | 1.113082  | -5.964112 | 0.619918  |
| H | 2.129673  | -4.754386 | 1.067990  |
| N | -5.840621 | -0.851320 | -1.358166 |
| H | -6.757935 | -0.413099 | -1.290861 |
| H | -5.549934 | -0.801866 | -2.333958 |
| N | -5.910268 | 1.025521  | 0.886871  |
| H | -6.526936 | 1.524316  | 0.247240  |
| H | -6.484344 | 0.382402  | 1.430064  |
| N | -1.018631 | 5.121822  | 1.126391  |
| H | -0.875606 | 5.006602  | 2.128848  |
| H | -0.765533 | 6.079553  | 0.888324  |
| N | 1.218044  | 5.099529  | -0.845990 |
| H | 0.964422  | 5.173643  | -1.829887 |
| H | 1.142883  | 6.030254  | -0.438412 |
| H | 5.755181  | 2.024562  | -1.102944 |
| H | 5.758893  | -1.954192 | 1.209305  |
| H | -0.853638 | -4.993535 | -2.028210 |
| H | 0.810473  | -5.101662 | 1.986800  |
| H | -5.952529 | -1.835247 | -1.121303 |
| H | -5.520702 | 1.711437  | 1.531653  |
| H | -2.014298 | 5.012712  | 0.940679  |
| H | 2.198907  | 4.826594  | -0.800459 |
| N | -0.356735 | 2.325671  | -2.690589 |
| N | -0.495974 | -2.096722 | 2.626293  |
| N | -3.540524 | -0.373571 | 2.874196  |
| N | 0.605080  | -2.164678 | -2.712055 |
| H | -1.088492 | 2.643306  | -2.060084 |
| H | -0.632382 | 2.011845  | -3.607248 |
| H | 0.952709  | -1.776367 | -3.574598 |
| H | 1.287438  | -2.543842 | -2.059654 |

|   |           |           |          |
|---|-----------|-----------|----------|
| H | -0.837097 | -1.720687 | 3.497025 |
| H | -1.177502 | -2.489542 | 1.981061 |
| H | -4.231289 | -0.867498 | 2.330351 |
| H | -3.375225 | -0.670157 | 3.821432 |

**Pt-C-IIIId (M11L, SMD water)**

|    |           |           |           |
|----|-----------|-----------|-----------|
| Pt | 0.000000  | 3.672487  | 0.113006  |
| Pt | 0.000000  | 0.000000  | -4.347394 |
| Pt | 0.000000  | -3.672487 | 0.113006  |
| Pt | 0.000000  | 0.000000  | 4.590346  |
| C  | 2.908688  | -0.872490 | 1.611480  |
| H  | 3.895358  | -0.513917 | 1.341861  |
| N  | 0.986346  | -2.204594 | 1.137329  |
| N  | 1.057218  | -0.892843 | 3.103103  |
| C  | 3.001842  | 1.078555  | -1.437900 |
| C  | 2.283098  | 1.948443  | -0.672429 |
| H  | 4.011629  | 0.784693  | -1.173128 |
| H  | 2.694139  | 2.381419  | 0.238401  |
| N  | 1.036043  | 2.333242  | -1.001933 |
| N  | 1.101850  | 0.887792  | -2.872426 |
| C  | -2.908688 | 0.872490  | 1.611480  |
| C  | -3.001842 | -1.078555 | -1.437900 |
| N  | -1.101850 | -0.887792 | -2.872426 |
| N  | -1.036043 | -2.333242 | -1.001933 |
| H  | -4.011629 | -0.784693 | -1.173128 |
| H  | -3.895358 | 0.513917  | 1.341861  |
| C  | -2.290182 | 0.474531  | 2.761306  |
| N  | -1.057218 | 0.892843  | 3.103103  |
| N  | -0.986346 | 2.204594  | 1.137329  |
| H  | -2.767537 | -0.217956 | 3.452039  |
| C  | 2.290182  | -0.474531 | 2.761306  |
| C  | -2.283098 | -1.948443 | -0.672429 |
| H  | 2.767537  | 0.217956  | 3.452039  |
| H  | -2.694139 | -2.381419 | 0.238401  |
| C  | 2.366071  | 0.521850  | -2.564247 |
| C  | -2.366071 | -0.521850 | -2.564247 |
| C  | 2.196724  | -1.735168 | 0.756953  |
| C  | -2.196724 | 1.735168  | 0.756953  |
| C  | 0.452258  | 1.836527  | -2.129946 |
| O  | -0.680331 | 2.254072  | -2.497663 |
| C  | -0.402774 | 1.785304  | 2.301186  |
| O  | 0.727680  | 2.234209  | 2.635356  |
| C  | 0.402774  | -1.785304 | 2.301186  |
| O  | -0.727680 | -2.234209 | 2.635356  |
| C  | -0.452258 | -1.836527 | -2.129946 |
| O  | 0.680331  | -2.254072 | -2.497663 |
| N  | 1.004686  | 5.162253  | -0.896472 |
| H  | 0.910873  | 6.082163  | -0.468438 |
| H  | 1.999532  | 4.945380  | -0.938849 |
| N  | -1.058936 | 5.014583  | 1.263681  |
| H  | -0.862736 | 5.991512  | 1.052889  |
| H  | -2.058449 | 4.868124  | 1.130333  |
| N  | 1.103861  | 0.930343  | -5.818558 |
| H  | 1.632463  | 0.257257  | -6.371664 |
| H  | 0.493956  | 1.441932  | -6.454504 |
| N  | -1.103861 | -0.930343 | -5.818558 |
| H  | -1.632463 | -0.257257 | -6.371664 |
| H  | -0.493956 | -1.441932 | -6.454504 |
| N  | 1.108972  | -0.975706 | 6.028904  |
| H  | 2.094275  | -0.985582 | 5.767354  |

|   |           |           |           |
|---|-----------|-----------|-----------|
| H | 1.042138  | -0.548597 | 6.951242  |
| N | -1.108972 | 0.975706  | 6.028904  |
| H | -2.094275 | 0.985582  | 5.767354  |
| H | -1.042138 | 0.548597  | 6.951242  |
| N | 1.058936  | -5.014583 | 1.263681  |
| H | 0.862736  | -5.991512 | 1.052889  |
| H | 2.058449  | -4.868124 | 1.130333  |
| N | -1.004686 | -5.162253 | -0.896472 |
| H | -0.910873 | -6.082163 | -0.468438 |
| H | -1.999532 | -4.945380 | -0.938849 |
| H | -0.803776 | 1.943406  | 6.115329  |
| H | 0.803776  | -1.943406 | 6.115329  |
| H | 0.662271  | 5.228921  | -1.853431 |
| H | -0.854178 | 4.866108  | 2.250738  |
| H | -1.767287 | -1.597791 | -5.427777 |
| H | 1.767287  | 1.597791  | -5.427777 |
| H | -0.662271 | -5.228921 | -1.853431 |
| H | 0.854178  | -4.866108 | 2.250738  |
| N | -2.676108 | 2.131572  | -0.416664 |
| N | -2.986575 | 0.352733  | -3.347326 |
| N | 2.986575  | -0.352733 | -3.347326 |
| N | 2.676108  | -2.131572 | -0.416664 |
| H | 3.557641  | -1.761391 | -0.735675 |
| H | 2.043790  | -2.515275 | -1.114536 |
| H | -2.043790 | 2.515275  | -1.114536 |
| H | -3.557641 | 1.761391  | -0.735675 |
| H | 3.919772  | -0.653137 | -3.119153 |
| H | 2.480662  | -0.868817 | -4.050019 |
| H | -2.480662 | 0.868817  | -4.050019 |
| H | -3.919772 | 0.653137  | -3.119153 |

**Pt-C-IVd (M11L, SMD water)**

|    |           |           |           |
|----|-----------|-----------|-----------|
| Pt | 0.000000  | 3.668006  | 0.000000  |
| Pt | -4.509069 | 0.000000  | 0.000000  |
| Pt | 0.000000  | -3.668006 | 0.000000  |
| Pt | 4.509069  | 0.000000  | 0.000000  |
| C  | -1.589966 | 0.981082  | 2.941425  |
| C  | -2.713272 | 0.545683  | 2.299695  |
| H  | -1.340811 | 0.646692  | 3.942089  |
| H  | -3.401267 | -0.152217 | 2.773679  |
| N  | -3.032777 | 0.928571  | 1.047987  |
| N  | -1.082951 | 2.259702  | 0.995700  |
| C  | 1.589966  | -0.981082 | 2.941425  |
| C  | 2.713272  | -0.545683 | 2.299695  |
| H  | 1.340811  | -0.646692 | 3.942089  |
| H  | 3.401267  | 0.152217  | 2.773679  |
| N  | 3.032777  | -0.928571 | 1.047987  |
| N  | 1.082951  | -2.259702 | 0.995700  |
| C  | 2.239823  | -1.835513 | 0.405254  |
| O  | 2.571826  | -2.292297 | -0.725825 |
| C  | 1.589966  | 0.981082  | -2.941425 |
| C  | -2.239823 | 1.835513  | 0.405254  |
| O  | -2.571826 | 2.292297  | -0.725825 |
| C  | -1.589966 | -0.981082 | -2.941425 |
| C  | -2.239823 | -1.835513 | -0.405254 |
| O  | -2.571826 | -2.292297 | 0.725825  |
| H  | 1.744681  | -4.728708 | 1.623129  |
| H  | 0.458697  | -5.748355 | 1.502831  |
| H  | 1.589346  | -5.702673 | 0.307075  |
| H  | -0.458697 | -5.748355 | -1.502831 |

|   |           |           |           |
|---|-----------|-----------|-----------|
| H | -1.589346 | -5.702673 | -0.307075 |
| H | -1.744681 | -4.728708 | -1.623129 |
| H | -5.594017 | -1.390500 | -1.919282 |
| H | -6.364583 | -1.746327 | -0.511274 |
| H | -6.736291 | -0.367360 | -1.327382 |
| H | -6.736291 | 0.367360  | 1.327382  |
| H | -5.594017 | 1.390500  | 1.919282  |
| H | -6.364583 | 1.746327  | 0.511274  |
| N | 1.071383  | -5.131041 | 0.972315  |
| N | -1.071383 | -5.131041 | -0.972315 |
| N | -5.971432 | -0.986041 | -1.063290 |
| N | -5.971432 | 0.986041  | 1.063290  |
| N | -1.082951 | -2.259702 | -0.995700 |
| N | -3.032777 | -0.928571 | -1.047987 |
| C | -2.713272 | -0.545683 | -2.299695 |
| H | -3.401267 | 0.152217  | -2.773679 |
| H | -1.340811 | -0.646692 | -3.942089 |
| H | 1.340811  | 0.646692  | -3.942089 |
| C | 2.713272  | 0.545683  | -2.299695 |
| N | 1.082951  | 2.259702  | -0.995700 |
| N | 3.032777  | 0.928571  | -1.047987 |
| C | 2.239823  | 1.835513  | -0.405254 |
| O | 2.571826  | 2.292297  | 0.725825  |
| H | 3.401267  | -0.152217 | -2.773679 |
| H | -1.589346 | 5.702673  | 0.307075  |
| H | -1.744681 | 4.728708  | 1.623129  |
| H | -0.458697 | 5.748355  | 1.502831  |
| H | 0.458697  | 5.748355  | -1.502831 |
| H | 1.589346  | 5.702673  | -0.307075 |
| H | 1.744681  | 4.728708  | -1.623129 |
| H | 5.594017  | 1.390500  | -1.919282 |
| H | 6.364583  | 1.746327  | -0.511274 |
| H | 6.736291  | 0.367360  | -1.327382 |
| H | 6.364583  | -1.746327 | 0.511274  |
| H | 6.736291  | -0.367360 | 1.327382  |
| H | 5.594017  | -1.390500 | 1.919282  |
| N | 5.971432  | 0.986041  | -1.063290 |
| N | 5.971432  | -0.986041 | 1.063290  |
| N | 1.071383  | 5.131041  | -0.972315 |
| N | -1.071383 | 5.131041  | 0.972315  |
| C | 0.720430  | -1.821353 | 2.223845  |
| C | -0.720430 | -1.821353 | -2.223845 |
| C | 0.720430  | 1.821353  | -2.223845 |
| C | -0.720430 | 1.821353  | 2.223845  |
| N | 0.449042  | 2.226674  | 2.705662  |
| N | -0.449042 | 2.226674  | -2.705662 |
| N | -0.449042 | -2.226674 | 2.705662  |
| N | 0.449042  | -2.226674 | -2.705662 |
| H | -1.156644 | -2.585521 | 2.069029  |
| H | -0.760263 | -1.868099 | 3.594459  |
| H | 0.760263  | -1.868099 | -3.594459 |
| H | 1.156644  | -2.585521 | -2.069029 |
| H | 0.760263  | 1.868099  | 3.594459  |
| H | 1.156644  | 2.585521  | 2.069029  |
| H | -1.156644 | 2.585521  | -2.069029 |
| H | -0.760263 | 1.868099  | -3.594459 |

**Pt-U-Ia (M11L, SMD water)**



|    |           |           |           |
|----|-----------|-----------|-----------|
| Pt | -2.920478 | 2.900943  | -0.395214 |
| Pt | 2.900943  | 2.920478  | -0.395214 |
| Pt | 2.920478  | -2.900943 | -0.395214 |
| Pt | -2.900943 | -2.920478 | -0.395214 |
| C  | -3.773774 | -1.172211 | 1.853505  |
| C  | 0.019890  | -4.118908 | 2.491973  |
| C  | -4.118908 | -0.019890 | 2.491973  |
| H  | -3.922712 | -2.148430 | 2.313337  |
| C  | 1.172211  | -3.773774 | 1.853505  |
| H  | 2.148430  | -3.922712 | 2.313337  |
| C  | -1.172211 | 3.773774  | 1.853505  |
| C  | 4.118908  | 0.019890  | 2.491973  |
| H  | -2.148430 | 3.922712  | 2.313337  |
| C  | -0.019890 | 4.118908  | 2.491973  |
| C  | 3.773774  | 1.172211  | 1.853505  |
| H  | 3.922712  | 2.148430  | 2.313337  |
| H  | 4.558843  | 0.032243  | 3.482739  |
| H  | -0.032243 | 4.558843  | 3.482739  |
| H  | -4.558843 | -0.032243 | 3.482739  |
| H  | 0.032243  | -4.558843 | 3.482739  |
| N  | 1.172211  | 3.316087  | 0.596681  |
| N  | -1.187233 | 3.233171  | 0.615592  |
| N  | 3.233171  | 1.187233  | 0.615592  |
| N  | 3.316087  | -1.172211 | 0.596681  |
| N  | 1.187233  | -3.233171 | 0.615592  |
| N  | -1.172211 | -3.316087 | 0.596681  |
| N  | -3.233171 | -1.187233 | 0.615592  |
| N  | -3.316087 | 1.172211  | 0.596681  |
| C  | 1.220486  | 3.906667  | 1.832826  |
| O  | 2.346382  | 4.237880  | 2.322401  |
| C  | 3.906667  | -1.220486 | 1.832826  |
| O  | 4.237880  | -2.346382 | 2.322401  |
| C  | -1.220486 | -3.906667 | 1.832826  |
| O  | -2.346382 | -4.237880 | 2.322401  |
| C  | -3.906667 | 1.220486  | 1.832826  |
| O  | -4.237880 | 2.346382  | 2.322401  |
| C  | 0.000151  | 2.999969  | -0.020838 |
| O  | 0.003072  | 2.499064  | -1.188249 |
| C  | -2.999969 | 0.000151  | -0.020838 |
| O  | -2.499064 | 0.003072  | -1.188249 |
| C  | 2.999969  | -0.000151 | -0.020838 |
| O  | 2.499064  | -0.003072 | -1.188249 |
| C  | -0.000151 | -2.999969 | -0.020838 |
| O  | -0.003072 | -2.499064 | -1.188249 |
| N  | -4.686316 | 2.583010  | -1.419431 |
| H  | -4.814873 | 3.203991  | -2.216300 |
| H  | -4.715618 | 1.624874  | -1.764774 |
| N  | -2.491775 | 4.643134  | -1.423406 |
| H  | -2.987369 | 4.726389  | -2.309270 |
| H  | -2.722767 | 5.459721  | -0.860187 |
| N  | 4.643134  | 2.491775  | -1.423406 |
| H  | 4.726389  | 2.987369  | -2.309270 |
| H  | 5.459721  | 2.722767  | -0.860187 |
| N  | 2.583010  | 4.686316  | -1.419431 |
| H  | 3.203991  | 4.814873  | -2.216300 |
| H  | 1.624874  | 4.715618  | -1.764774 |
| N  | 2.491775  | -4.643134 | -1.423406 |
| H  | 1.493613  | -4.676624 | -1.627034 |
| H  | 2.987369  | -4.726389 | -2.309270 |
| N  | 4.686316  | -2.583010 | -1.419431 |

|   |           |           |           |
|---|-----------|-----------|-----------|
| H | 5.480483  | -2.712559 | -0.795895 |
| H | 4.814873  | -3.203991 | -2.216300 |
| N | -4.643134 | -2.491775 | -1.423406 |
| H | -4.726389 | -2.987369 | -2.309270 |
| H | -5.459721 | -2.722767 | -0.860187 |
| N | -2.583010 | -4.686316 | -1.419431 |
| H | -3.203991 | -4.814873 | -2.216300 |
| H | -1.624874 | -4.715618 | -1.764774 |
| H | 2.722767  | -5.459721 | -0.860187 |
| H | -2.712559 | -5.480483 | -0.795895 |
| H | -4.676624 | -1.493613 | -1.627034 |
| H | 4.715618  | -1.624874 | -1.764774 |
| H | 2.712559  | 5.480483  | -0.795895 |
| H | -5.480483 | 2.712559  | -0.795895 |
| H | -1.493613 | 4.676624  | -1.627034 |
| H | 4.676624  | 1.493613  | -1.627034 |

**Pt-U-IIa (M11L, SMD water)**

|    |           |           |           |
|----|-----------|-----------|-----------|
| Pt | 3.839308  | 1.977666  | -0.036667 |
| Pt | 1.802891  | -3.528215 | -0.650021 |
| Pt | -3.812374 | -1.872282 | -0.120943 |
| Pt | -1.742078 | 3.637815  | -0.595100 |
| C  | -0.418831 | 2.710825  | 1.890148  |
| C  | -4.897152 | 1.866674  | 1.619123  |
| C  | 0.582822  | 2.316922  | 2.723123  |
| H  | -1.426936 | 2.896488  | 2.259711  |
| C  | 4.788553  | -0.452172 | 1.339834  |
| C  | -0.566878 | -2.274869 | 2.645033  |
| H  | 5.443239  | 0.301909  | 1.777194  |
| C  | 4.902001  | -1.768048 | 1.671483  |
| C  | 0.437570  | -2.660220 | 1.811732  |
| H  | 1.437279  | -2.880406 | 2.185967  |
| H  | -0.405339 | -2.166919 | 3.711886  |
| H  | 5.649103  | -2.112811 | 2.377702  |
| H  | 0.411555  | 2.175070  | 3.784446  |
| H  | -5.648619 | 2.221548  | 2.315844  |
| N  | 3.087931  | -2.197120 | 0.191488  |
| N  | 3.878148  | 0.007439  | 0.455524  |
| N  | 0.264586  | -2.816577 | 0.479424  |
| N  | -1.992174 | -2.166707 | 0.742582  |
| N  | -3.886709 | 0.098131  | 0.382080  |
| N  | -3.038701 | 2.290611  | 0.192727  |
| N  | -0.232650 | 2.913322  | 0.565448  |
| N  | 2.026973  | 2.277987  | 0.833913  |
| C  | 4.022661  | -2.698060 | 1.061286  |
| O  | 4.060332  | -3.954266 | 1.269521  |
| C  | -1.859055 | -2.037792 | 2.103142  |
| O  | -2.872741 | -1.743002 | 2.809081  |
| C  | -3.977394 | 2.706664  | 1.071295  |
| C  | 1.885041  | 2.116359  | 2.189731  |
| O  | 2.898000  | 1.822468  | 2.896309  |
| C  | 3.006558  | -0.873035 | -0.123531 |
| O  | 2.146232  | -0.462939 | -0.959565 |
| C  | 1.000428  | 2.667376  | 0.032631  |
| O  | 1.197012  | 2.831178  | -1.216337 |
| C  | -0.959933 | -2.541736 | -0.059279 |
| O  | -1.143972 | -2.668916 | -1.314874 |
| C  | -2.985232 | 0.967972  | -0.155267 |
| O  | -2.116598 | 0.571058  | -0.988729 |
| N  | 3.791818  | 3.977527  | -0.542089 |

|   |           |           |           |
|---|-----------|-----------|-----------|
| H | 4.556782  | 4.280807  | -1.140872 |
| H | 2.912673  | 4.123798  | -1.040226 |
| N | 5.679841  | 1.680499  | -0.937244 |
| H | 6.064631  | 2.517608  | -1.372048 |
| H | 6.365746  | 1.347512  | -0.261217 |
| N | 0.527753  | -4.918287 | -1.496559 |
| H | 0.887218  | -5.322063 | -2.359187 |
| H | 0.329671  | -5.682788 | -0.855048 |
| N | 3.421414  | -4.281660 | -1.680740 |
| H | 3.222165  | -5.129081 | -2.208910 |
| H | 3.797844  | -3.592494 | -2.328128 |
| N | -5.678007 | -1.599789 | -0.964725 |
| H | -5.644000 | -0.918265 | -1.719313 |
| H | -6.100807 | -2.448823 | -1.333944 |
| N | -3.734367 | -3.869348 | -0.646944 |
| H | -3.721138 | -4.462993 | 0.179944  |
| H | -4.503281 | -4.177485 | -1.238303 |
| N | -0.473403 | 5.074055  | -1.364590 |
| H | -0.819298 | 5.491954  | -2.226028 |
| H | -0.315013 | 5.824311  | -0.695944 |
| N | -3.277936 | 4.398247  | -1.742050 |
| H | -3.076027 | 4.289740  | -2.734540 |
| H | -4.153340 | 3.913196  | -1.552531 |
| H | -6.272894 | -1.231929 | -0.221710 |
| H | -3.427882 | 5.389491  | -1.561678 |
| H | 0.410657  | 4.599640  | -1.556371 |
| H | -2.859513 | -4.003532 | -1.155152 |
| H | 4.139476  | -4.497621 | -0.988706 |
| H | 3.795126  | 4.565592  | 0.288843  |
| H | 5.593632  | 0.970537  | -1.662818 |
| H | -0.338468 | -4.415954 | -1.699970 |
| C | -4.868398 | 0.495761  | 1.252990  |
| O | -5.705777 | -0.362893 | 1.681113  |
| H | -3.956579 | 3.769729  | 1.313351  |

**Pt-U-IIIa (M11L, SMD water)**

|    |           |           |           |
|----|-----------|-----------|-----------|
| Pt | 3.189215  | -2.800307 | -0.240761 |
| Pt | -2.634085 | -3.156770 | -0.417625 |
| Pt | -3.073732 | 2.742012  | -0.349580 |
| Pt | 2.796408  | 3.036230  | -0.404367 |
| C  | -0.051483 | 2.373620  | 2.671994  |
| C  | 5.114754  | 0.316484  | 1.926466  |
| C  | 1.358497  | -2.596733 | 2.080178  |
| C  | -5.236571 | -0.419467 | 1.517891  |
| H  | 2.316999  | -2.448883 | 2.578747  |
| C  | 0.189703  | -2.666589 | 2.773420  |
| C  | -4.541880 | -1.516444 | 1.107872  |
| H  | -4.818790 | -2.520341 | 1.429639  |
| H  | -6.094747 | -0.502858 | 2.175233  |
| H  | 0.165290  | -2.578945 | 3.854018  |
| H  | 5.867730  | 0.379168  | 2.704092  |
| H  | -0.009242 | 2.230121  | 3.746051  |
| N  | -0.937164 | -2.938748 | 0.690225  |
| N  | 1.413578  | -2.725516 | 0.736215  |
| N  | -3.480954 | -1.443810 | 0.277212  |
| N  | -3.714359 | 0.903062  | 0.249277  |
| N  | -1.303660 | 2.615738  | 0.660155  |
| N  | 1.056464  | 2.694793  | 0.589124  |
| N  | 3.617011  | 1.360507  | 0.397762  |
| N  | 3.734236  | -0.991289 | 0.493360  |

|   |           |           |           |
|---|-----------|-----------|-----------|
| C | -1.022352 | -2.884845 | 2.061330  |
| O | -2.147010 | -3.045452 | 2.625662  |
| C | -4.824791 | 0.856027  | 1.054097  |
| O | -5.436591 | 1.938223  | 1.336628  |
| C | 1.080482  | 2.496201  | 1.926967  |
| C | 4.664929  | -0.883653 | 1.465276  |
| C | 0.252873  | -2.871234 | 0.035756  |
| O | 0.295500  | -2.973419 | -1.234735 |
| C | 3.187500  | 0.144070  | -0.038490 |
| O | 2.302041  | 0.059178  | -0.941627 |
| C | -3.057088 | -0.219273 | -0.159992 |
| O | -2.073698 | -0.139180 | -0.957627 |
| C | -0.148311 | 2.718584  | -0.050454 |
| O | -0.187175 | 2.872535  | -1.316467 |
| N | 5.018669  | -2.875622 | -1.195179 |
| H | 5.182761  | -3.749649 | -1.691294 |
| H | 5.090763  | -2.119740 | -1.874032 |
| N | 2.626688  | -4.645595 | -0.977479 |
| H | 3.240070  | -5.008818 | -1.704104 |
| H | 2.578629  | -5.341547 | -0.236637 |
| N | -4.352724 | -3.385666 | -1.545138 |
| H | -4.380875 | -4.256723 | -2.072383 |
| H | -5.178776 | -3.365230 | -0.948401 |
| N | -1.812215 | -4.904960 | -1.141443 |
| H | -2.315878 | -5.306834 | -1.929353 |
| H | -0.868690 | -4.661043 | -1.448257 |
| N | -2.460553 | 4.614200  | -0.972168 |
| H | -1.510000 | 4.503328  | -1.327105 |
| H | -3.038389 | 5.008105  | -1.711761 |
| N | -4.880690 | 2.909151  | -1.332357 |
| H | -5.593245 | 2.759844  | -0.616042 |
| H | -5.036819 | 3.814373  | -1.770731 |
| N | 4.613345  | 3.399664  | -1.308813 |
| H | 4.690729  | 4.331268  | -1.712454 |
| H | 5.335190  | 3.303719  | -0.594853 |
| N | 1.962621  | 4.740501  | -1.226574 |
| H | 2.477802  | 5.097959  | -2.028404 |
| H | 1.022444  | 4.479643  | -1.530345 |
| H | -2.449380 | 5.278124  | -0.201314 |
| H | 1.894215  | 5.489994  | -0.541963 |
| H | 4.801421  | 2.725422  | -2.047672 |
| H | -4.985895 | 2.195147  | -2.049723 |
| H | -1.748867 | -5.617357 | -0.417821 |
| H | 5.775731  | -2.758480 | -0.523608 |
| H | 1.692719  | -4.521323 | -1.372321 |
| H | -4.435971 | -2.619542 | -2.211186 |
| C | -1.314402 | 2.476266  | 2.027573  |
| O | -2.420677 | 2.467288  | 2.649400  |
| H | 2.071188  | 2.458763  | 2.380165  |
| H | 5.045707  | -1.826443 | 1.859504  |
| C | 4.588847  | 1.504638  | 1.354813  |
| O | 4.967725  | 2.676722  | 1.677375  |

**Pt-U-IVa (M11L, SMD water)**

|    |           |           |           |
|----|-----------|-----------|-----------|
| Pt | -2.913934 | 3.214711  | -0.071038 |
| Pt | 2.913934  | 2.636017  | -0.657453 |
| Pt | 2.913934  | -3.214711 | -0.071038 |
| Pt | -2.913934 | -2.636017 | -0.657453 |
| C  | -4.603771 | -1.033422 | 1.161148  |
| C  | -0.274096 | -2.417448 | 2.666262  |

|   |           |           |           |
|---|-----------|-----------|-----------|
| C | -5.161337 | 0.066981  | 1.736193  |
| H | -4.939864 | -2.041160 | 1.407223  |
| C | 5.161337  | -0.066981 | 1.736193  |
| C | 0.274096  | 2.417448  | 2.666262  |
| C | 4.603771  | 1.033422  | 1.161148  |
| H | 4.939864  | 2.041160  | 1.407223  |
| H | 5.962721  | 0.015048  | 2.462104  |
| H | 0.389050  | 2.263805  | 3.733577  |
| H | -5.962721 | -0.015048 | 2.462104  |
| H | -0.389050 | -2.263805 | 3.733577  |
| N | 1.237002  | 2.599089  | 0.494901  |
| N | -1.098689 | 2.832272  | 0.768114  |
| N | 3.613792  | 0.956664  | 0.245616  |
| N | 3.660298  | -1.392774 | 0.444796  |
| N | 1.098689  | -2.832272 | 0.768114  |
| N | -1.237002 | -2.599089 | 0.494901  |
| N | -3.613792 | -0.956664 | 0.245616  |
| N | -3.660298 | 1.392774  | 0.444796  |
| C | 1.345921  | 2.402523  | 1.829004  |
| C | 4.687150  | -1.349496 | 1.352026  |
| O | 5.174212  | -2.440482 | 1.792402  |
| C | -1.345921 | -2.402523 | 1.829004  |
| C | -4.687150 | 1.349496  | 1.352026  |
| O | -5.174212 | 2.440482  | 1.792402  |
| C | -0.005593 | 2.794602  | -0.038864 |
| O | -0.137296 | 2.967193  | -1.295083 |
| C | -3.126196 | 0.269870  | -0.112960 |
| O | -2.200998 | 0.348354  | -0.976385 |
| C | 3.126196  | -0.269870 | -0.112960 |
| O | 2.200998  | -0.348354 | -0.976385 |
| C | 0.005593  | -2.794602 | -0.038864 |
| O | 0.137296  | -2.967193 | -1.295083 |
| N | -4.777963 | 3.652169  | -0.846885 |
| H | -4.888431 | 4.625604  | -1.122513 |
| H | -5.004444 | 3.072591  | -1.651778 |
| N | -2.140657 | 5.044287  | -0.640194 |
| H | -2.762792 | 5.587087  | -1.235832 |
| H | -1.904142 | 5.618052  | 0.166687  |
| N | 4.648577  | 2.642601  | -1.772406 |
| H | 4.673657  | 3.365046  | -2.489318 |
| H | 5.457670  | 2.780970  | -1.169118 |
| N | 2.258480  | 4.375433  | -1.558331 |
| H | 2.725225  | 4.578676  | -2.439436 |
| H | 1.260408  | 4.239033  | -1.734648 |
| N | 2.140657  | -5.044287 | -0.640194 |
| H | 1.284850  | -4.848580 | -1.160749 |
| H | 2.762792  | -5.587087 | -1.235832 |
| N | 4.777963  | -3.652169 | -0.846885 |
| H | 5.442113  | -3.448208 | -0.098418 |
| H | 4.888431  | -4.625604 | -1.122513 |
| N | -4.648577 | -2.642601 | -1.772406 |
| H | -4.673657 | -3.365046 | -2.489318 |
| H | -5.457670 | -2.780970 | -1.169118 |
| N | -2.258480 | -4.375433 | -1.558331 |
| H | -2.725225 | -4.578676 | -2.439436 |
| H | -1.260408 | -4.239033 | -1.734648 |
| H | 1.904142  | -5.618052 | 0.166687  |
| H | -2.386015 | -5.177437 | -0.945942 |
| H | -4.760677 | -1.743744 | -2.238672 |
| H | 5.004444  | -3.072591 | -1.651778 |

|   |           |           |           |
|---|-----------|-----------|-----------|
| H | 2.386015  | 5.177437  | -0.945942 |
| H | -5.442113 | 3.448208  | -0.098418 |
| H | -1.284850 | 4.848580  | -1.160749 |
| H | 4.760677  | 1.743744  | -2.238672 |
| C | 1.017490  | -2.665081 | 2.128781  |
| O | 2.067696  | -2.754197 | 2.836326  |
| H | -2.356158 | -2.238922 | 2.202257  |
| C | -1.017490 | 2.665081  | 2.128781  |
| O | -2.067696 | 2.754197  | 2.836326  |
| H | 2.356158  | 2.238922  | 2.202257  |

| <b>Pt-U-Ib (M11L, SMD water)</b> |           |           |           |
|----------------------------------|-----------|-----------|-----------|
| Pt                               | -1.925659 | -3.607797 | 0.348108  |
| Pt                               | -3.816223 | 1.827132  | -0.164280 |
| Pt                               | 1.697427  | 3.602914  | -0.080587 |
| Pt                               | 3.615331  | -1.955709 | -0.655020 |
| C                                | -2.557506 | -1.072949 | -3.036186 |
| C                                | 0.919633  | -1.333037 | 2.593108  |
| C                                | 1.991800  | -1.361271 | 1.754489  |
| H                                | 2.936804  | -0.895049 | 2.031862  |
| C                                | -1.951115 | 1.566592  | 2.150963  |
| C                                | 5.162051  | 1.530220  | 1.203660  |
| H                                | -2.856394 | 1.166542  | 2.604930  |
| C                                | -0.803053 | 1.728788  | 2.864156  |
| C                                | 4.162555  | 2.426765  | 0.977825  |
| H                                | 4.186443  | 3.426053  | 1.412700  |
| H                                | 6.020337  | 1.778034  | 1.818542  |
| H                                | -0.743658 | 1.454612  | 3.911867  |
| H                                | 0.970911  | -0.839991 | 3.557939  |
| N                                | 0.206120  | 2.608335  | 0.894613  |
| N                                | -2.050259 | 1.901252  | 0.845331  |
| N                                | 3.090597  | 2.154641  | 0.204186  |
| N                                | 3.930741  | -0.022955 | -0.115508 |
| N                                | 1.966083  | -1.975518 | 0.548379  |
| N                                | -0.284666 | -2.572743 | 0.961325  |
| N                                | -3.259309 | 0.117984  | -1.101302 |
| N                                | -2.489794 | -2.100736 | -0.889749 |
| C                                | -2.266698 | -2.126287 | -2.220247 |
| H                                | -1.842706 | -3.051461 | -2.610362 |
| H                                | -2.386183 | -1.120740 | -4.105696 |
| C                                | 5.052149  | 0.238658  | 0.631205  |
| O                                | 5.924944  | -0.678426 | 0.783603  |
| C                                | -0.276867 | -1.995476 | 2.205548  |
| O                                | -1.300256 | -2.100697 | 2.950834  |
| C                                | -3.075130 | 0.116326  | -2.458149 |
| O                                | -3.381681 | 1.157662  | -3.125532 |
| C                                | 0.331860  | 2.303510  | 2.227158  |
| O                                | 1.413656  | 2.570499  | 2.837514  |
| C                                | -3.030131 | -0.977569 | -0.327348 |
| O                                | -3.326886 | -0.967160 | 0.903239  |
| C                                | -0.950914 | 2.392633  | 0.205151  |
| O                                | -1.018996 | 2.688531  | -1.031245 |
| C                                | 2.974619  | 0.918187  | -0.367333 |
| O                                | 1.996315  | 0.656081  | -1.128204 |
| C                                | 0.797628  | -2.552563 | 0.136597  |
| O                                | 0.726389  | -3.093170 | -1.013217 |
| N                                | -1.309622 | -5.098775 | 1.635758  |
| H                                | -1.953884 | -5.884237 | 1.701240  |
| H                                | -0.403330 | -5.459983 | 1.344628  |
| N                                | -3.568305 | -4.695038 | -0.283949 |

|   |           |           |           |
|---|-----------|-----------|-----------|
| H | -3.419939 | -5.701060 | -0.228810 |
| H | -4.388045 | -4.471531 | 0.277728  |
| N | -4.388681 | 3.564287  | 0.801839  |
| H | -4.618194 | 4.306283  | 0.143352  |
| H | -5.207795 | 3.405155  | 1.385148  |
| N | -5.580823 | 1.763434  | -1.227024 |
| H | -6.197815 | 1.029650  | -0.886911 |
| H | -6.099107 | 2.639603  | -1.215734 |
| N | 0.324926  | 5.115781  | -0.379092 |
| H | -0.008319 | 5.497605  | 0.503693  |
| H | 0.677296  | 5.889488  | -0.938631 |
| N | 3.160045  | 4.685307  | -1.065050 |
| H | 3.494340  | 5.453601  | -0.486021 |
| H | 3.961020  | 4.100052  | -1.297541 |
| N | 3.350550  | -3.947326 | -1.145179 |
| H | 3.821262  | -4.214692 | -2.006989 |
| H | 3.688709  | -4.557630 | -0.404960 |
| N | 5.334566  | -1.878539 | -1.787265 |
| H | 6.041908  | -1.479515 | -1.167638 |
| H | 5.660889  | -2.785592 | -2.114692 |
| H | -0.464181 | 4.689194  | -0.867390 |
| H | -3.641704 | 3.905786  | 1.404109  |
| H | -5.321183 | 1.552626  | -2.192107 |
| H | -3.789096 | -4.469428 | -1.253045 |
| H | -1.203818 | -4.702688 | 2.568993  |
| H | 2.342850  | -4.076824 | -1.259060 |
| H | 2.807978  | 5.082500  | -1.934878 |
| H | 5.227858  | -1.273992 | -2.598171 |

**Pt-U-IIb1 (M11L, SMD water)**

|    |           |           |           |
|----|-----------|-----------|-----------|
| Pt | -1.495937 | -3.784524 | -0.254787 |
| Pt | 3.934222  | -1.552198 | 0.001575  |
| Pt | 1.591547  | 3.808035  | 0.034548  |
| Pt | -3.843723 | 1.573597  | -0.510566 |
| C  | 2.344293  | 0.968240  | -3.060124 |
| C  | -1.247807 | 2.215633  | 2.788368  |
| C  | -2.278463 | 1.884589  | 1.962288  |
| H  | -3.195895 | 1.437522  | 2.344987  |
| C  | -4.720471 | -1.910927 | 1.797381  |
| C  | 0.872952  | -2.217241 | 2.909410  |
| C  | -3.764226 | -2.772400 | 1.351845  |
| C  | -0.134602 | -2.707473 | 2.135794  |
| H  | -1.101097 | -2.980538 | 2.560257  |
| H  | -3.694849 | -3.793673 | 1.727349  |
| H  | -5.447877 | -2.206126 | 2.544795  |
| H  | 0.751313  | -2.079912 | 3.978069  |
| H  | -1.299645 | 2.039771  | 3.856917  |
| N  | -0.004478 | -2.902179 | 0.805644  |
| N  | 2.194644  | -2.055150 | 0.934253  |
| N  | -2.843626 | -2.429046 | 0.425501  |
| N  | -3.811893 | -0.282903 | 0.315424  |
| N  | -2.249228 | 2.105933  | 0.629437  |
| N  | -0.076350 | 2.994222  | 0.868432  |
| N  | 3.078981  | -0.012929 | -1.019115 |
| N  | 2.070333  | 2.121396  | -0.995635 |
| C  | 1.918881  | 2.040054  | -2.333860 |
| H  | 1.439824  | 2.896404  | -2.807863 |
| H  | 2.223031  | 0.928305  | -4.136908 |
| C  | -4.760678 | -0.599700 | 1.252947  |
| O  | -5.619974 | 0.279371  | 1.583539  |

|   |           |           |           |
|---|-----------|-----------|-----------|
| C | -0.091145 | 2.817665  | 2.229323  |
| O | 0.908556  | 3.206321  | 2.914999  |
| C | 2.980772  | -0.104872 | -2.383049 |
| O | 3.473478  | -1.121155 | -2.972653 |
| C | 2.113076  | -1.899329 | 2.295262  |
| O | 3.138498  | -1.502681 | 2.937250  |
| C | -2.850112 | -1.160985 | -0.085905 |
| O | -1.981390 | -0.818774 | -0.943273 |
| C | 1.167774  | -2.552172 | 0.193632  |
| O | 1.295266  | -2.721282 | -1.060098 |
| C | -1.131050 | 2.664081  | 0.075148  |
| O | -1.088628 | 2.886319  | -1.175392 |
| C | 2.652804  | 1.080351  | -0.326674 |
| O | 2.809109  | 1.150134  | 0.930131  |
| N | -3.862236 | 3.454121  | -1.373373 |
| H | -4.391184 | 3.497919  | -2.242180 |
| H | -4.240054 | 4.157345  | -0.742824 |
| N | -5.500418 | 1.010183  | -1.604727 |
| H | -6.088582 | 1.801398  | -1.860924 |
| H | -5.228695 | 0.534748  | -2.462965 |
| N | -0.127753 | -5.173491 | -0.931896 |
| H | 0.157991  | -5.802206 | -0.184829 |
| H | -0.458426 | -5.742188 | -1.708626 |
| N | -3.033322 | -4.699665 | -1.284466 |
| H | -3.275877 | -4.154350 | -2.110032 |
| H | -2.803151 | -5.642499 | -1.593185 |
| N | 4.821741  | -3.069730 | 1.086340  |
| H | 5.837376  | -3.082096 | 1.020840  |
| H | 4.561070  | -2.904030 | 2.059466  |
| N | 5.684007  | -1.080009 | -0.989393 |
| H | 6.429422  | -1.761621 | -0.863031 |
| H | 5.444308  | -1.042567 | -1.981013 |
| N | 1.153799  | 5.512118  | 1.109286  |
| H | 1.854789  | 6.246322  | 1.033018  |
| H | 0.258452  | 5.908092  | 0.832836  |
| N | 3.297756  | 4.634996  | -0.789803 |
| H | 3.473990  | 5.592034  | -0.489549 |
| H | 4.107640  | 4.074240  | -0.529345 |
| H | 4.480594  | -3.986886 | 0.807664  |
| H | 6.041233  | -0.170669 | -0.705635 |
| H | 1.092920  | 5.219036  | 2.085390  |
| H | 3.238426  | 4.638103  | -1.806761 |
| H | -2.883047 | 3.671570  | -1.571720 |
| H | -6.071462 | 0.365812  | -1.059984 |
| H | -3.867991 | -4.762994 | -0.703149 |
| H | 0.684017  | -4.633504 | -1.239340 |

**Pt-U-IIb2 (M11L, SMD water)**

|   |           |           |           |
|---|-----------|-----------|-----------|
| C | -2.579935 | 1.319053  | -3.030907 |
| C | -0.996922 | -1.579075 | 2.753643  |
| C | -0.166480 | -2.209384 | 1.876075  |
| C | 4.454938  | -2.910770 | 1.279750  |
| C | 1.215185  | 1.264182  | 2.680386  |
| C | 4.720365  | -1.633681 | 0.890234  |
| H | 5.146530  | -3.472312 | 1.897725  |
| H | 1.020173  | 0.862768  | 3.669061  |
| H | -0.700889 | -1.401703 | 3.781780  |
| N | 2.660794  | 1.571570  | 0.818073  |
| N | 0.477940  | 2.472402  | 0.766548  |
| N | 3.886945  | -0.915393 | 0.110031  |

|    |           |           |           |
|----|-----------|-----------|-----------|
| N  | 2.400298  | -2.747022 | 0.082070  |
| N  | -0.508142 | -2.461973 | 0.592199  |
| N  | -2.577101 | -1.379587 | 0.986793  |
| N  | -1.881520 | 2.402059  | -1.028730 |
| N  | -3.433783 | 0.632788  | -0.920156 |
| C  | -1.818061 | 2.233535  | -2.366715 |
| C  | 0.255184  | 1.938605  | 1.989054  |
| C  | 2.709091  | -1.474892 | -0.304549 |
| O  | 1.928423  | -0.827805 | -1.065352 |
| C  | 1.687062  | 2.263913  | 0.167705  |
| O  | 1.904105  | 2.736008  | -0.994714 |
| C  | -1.718857 | -2.007817 | 0.137261  |
| O  | -2.046482 | -2.195724 | -1.076741 |
| C  | -2.721950 | 1.609784  | -0.298091 |
| O  | -2.850649 | 1.807435  | 0.947059  |
| Pt | 4.309196  | 1.038930  | -0.243212 |
| Pt | -0.796800 | 3.821400  | -0.070614 |
| Pt | -4.368387 | -0.730962 | 0.258478  |
| Pt | 0.691093  | -3.662567 | -0.551277 |
| N  | -0.971931 | -4.714950 | -1.187058 |
| H  | -0.802786 | -5.255910 | -2.032220 |
| H  | -1.298726 | -5.355566 | -0.467491 |
| N  | 1.932466  | -4.920467 | -1.607760 |
| H  | 1.451281  | -5.672436 | -2.097276 |
| H  | 2.480642  | -4.404281 | -2.292328 |
| N  | 4.722409  | 3.033037  | -0.572192 |
| H  | 5.015585  | 3.505230  | 0.279499  |
| H  | 5.435021  | 3.194756  | -1.281054 |
| N  | 5.957228  | 0.480278  | -1.362349 |
| H  | 5.771742  | 0.615705  | -2.354651 |
| H  | 6.782732  | 1.027333  | -1.123380 |
| N  | 0.317138  | 5.264904  | 0.900620  |
| H  | -0.050795 | 6.207921  | 0.789067  |
| H  | 0.348819  | 5.062784  | 1.898631  |
| N  | -2.050572 | 5.246862  | -0.881451 |
| H  | -2.680990 | 5.623127  | -0.175496 |
| H  | -1.528242 | 6.026280  | -1.277932 |
| N  | -5.275340 | -2.083110 | 1.529110  |
| H  | -6.287641 | -1.989151 | 1.578203  |
| H  | -5.062841 | -3.045238 | 1.274099  |
| N  | -6.155150 | -0.104261 | -0.562260 |
| H  | -6.945053 | -0.712016 | -0.355993 |
| H  | -6.400586 | 0.838494  | -0.268742 |
| H  | 1.274898  | 5.263454  | 0.554084  |
| H  | -2.624470 | 4.851974  | -1.624661 |
| H  | -4.886917 | -1.901068 | 2.455473  |
| H  | -5.994911 | -0.102050 | -1.570952 |
| H  | -1.696989 | -4.017694 | -1.373046 |
| H  | 2.570039  | -5.332707 | -0.925413 |
| H  | 6.188567  | -0.502417 | -1.226319 |
| H  | 3.839804  | 3.438547  | -0.890079 |
| C  | 2.502890  | 1.105777  | 2.099935  |
| O  | 3.486520  | 0.578818  | 2.705417  |
| C  | 3.239758  | -3.506876 | 0.859428  |
| O  | 2.901513  | -4.701023 | 1.152045  |
| C  | -2.280264 | -1.167213 | 2.309280  |
| O  | -3.156786 | -0.637729 | 3.066113  |
| C  | -3.444999 | 0.477959  | -2.280682 |
| O  | -4.218409 | -0.392116 | -2.798062 |
| H  | -0.742059 | 2.094233  | 2.398731  |

|   |           |           |           |
|---|-----------|-----------|-----------|
| H | 5.633948  | -1.123432 | 1.195750  |
| H | 0.819095  | -2.562648 | 2.179821  |
| H | -2.529564 | 1.216483  | -4.109234 |
| H | -1.123051 | 2.889556  | -2.890284 |

**Pt-U-IIB3 (M11L, SMD water)**

|    |           |           |           |
|----|-----------|-----------|-----------|
| Pt | -1.180564 | -3.804780 | -0.409872 |
| Pt | 4.092161  | -1.347611 | 0.188043  |
| Pt | 1.503035  | 3.927574  | 0.086516  |
| Pt | -3.802135 | 1.525841  | -0.477476 |
| C  | 2.607321  | 1.144422  | -2.927889 |
| C  | -1.161552 | 2.113674  | 2.854980  |
| C  | -4.795555 | -2.270869 | 1.181681  |
| C  | 0.948218  | -2.188843 | 2.940276  |
| C  | -3.702432 | -3.016018 | 0.861429  |
| H  | -5.616690 | -2.682234 | 1.757557  |
| H  | 0.788475  | -2.070251 | 4.006299  |
| H  | -1.173833 | 1.931496  | 3.923899  |
| N  | 0.211535  | -2.944724 | 0.806135  |
| N  | 2.312454  | -1.883724 | 1.012971  |
| N  | -2.672615 | -2.532136 | 0.134949  |
| N  | -3.772492 | -0.446310 | 0.039913  |
| N  | -2.222063 | 2.006926  | 0.721969  |
| N  | -0.056546 | 2.928976  | 0.914343  |
| N  | 3.262937  | 0.189294  | -0.848261 |
| N  | 2.179854  | 2.279792  | -0.879212 |
| C  | 2.101125  | 2.195100  | -2.224266 |
| C  | -0.086778 | 2.677576  | 2.241699  |
| C  | 2.078219  | -1.731127 | 2.335235  |
| C  | -2.702811 | -1.230466 | -0.282754 |
| O  | -1.748888 | -0.768719 | -0.980536 |
| C  | 1.355960  | -2.471737 | 0.236516  |
| O  | 1.546592  | -2.602641 | -1.013895 |
| C  | -1.123912 | 2.570323  | 0.144712  |
| O  | -1.097068 | 2.788368  | -1.108832 |
| C  | 2.769968  | 1.266470  | -0.176981 |
| O  | 2.877906  | 1.348091  | 1.084986  |
| N  | -3.852459 | 3.522547  | -1.011160 |
| H  | -4.461503 | 3.728657  | -1.800315 |
| H  | -4.144868 | 4.107610  | -0.231778 |
| N  | -5.435594 | 1.058194  | -1.650867 |
| H  | -5.907823 | 1.866377  | -2.050213 |
| H  | -5.182576 | 0.436793  | -2.415509 |
| N  | 0.284723  | -5.142684 | -0.977190 |
| H  | 0.532294  | -5.763694 | -0.210440 |
| H  | 0.031955  | -5.718490 | -1.777836 |
| N  | -2.589741 | -4.676392 | -1.645479 |
| H  | -3.087697 | -3.949629 | -2.157097 |
| H  | -2.194062 | -5.319603 | -2.328765 |
| N  | 4.966632  | -2.908554 | 1.228517  |
| H  | 5.958908  | -2.753740 | 1.399337  |
| H  | 4.518433  | -3.041960 | 2.134019  |
| N  | 5.880322  | -0.831302 | -0.700800 |
| H  | 6.641507  | -1.484408 | -0.527580 |
| H  | 5.688605  | -0.813924 | -1.703684 |
| N  | 0.803371  | 5.619754  | 1.045621  |
| H  | 1.339205  | 6.459006  | 0.830006  |
| H  | -0.164855 | 5.795491  | 0.782331  |
| N  | 3.099659  | 4.948445  | -0.734383 |
| H  | 3.373846  | 5.764315  | -0.189507 |

|   |           |           |           |
|---|-----------|-----------|-----------|
| H | 3.909860  | 4.334501  | -0.797848 |
| H | 4.874728  | -3.780497 | 0.710270  |
| H | 6.190957  | 0.093997  | -0.412995 |
| H | 0.828648  | 5.490891  | 2.056038  |
| H | 2.876693  | 5.265775  | -1.676328 |
| H | -2.892776 | 3.765023  | -1.265374 |
| H | -6.085553 | 0.571849  | -1.031855 |
| H | -3.275816 | -5.194176 | -1.098529 |
| H | 1.100139  | -4.577385 | -1.222742 |
| C | -2.307687 | 1.791636  | 2.076388  |
| O | -3.384403 | 1.345686  | 2.577945  |
| C | -0.023016 | -2.871326 | 2.156998  |
| O | -1.060236 | -3.416145 | 2.645419  |
| C | -4.850479 | -0.924235 | 0.740103  |
| O | -5.844884 | -0.155694 | 0.956655  |
| C | 3.239559  | 0.092570  | -2.215774 |
| O | 3.793819  | -0.909145 | -2.773442 |
| H | 2.545818  | 1.102511  | -4.009529 |
| H | 1.612668  | 3.032758  | -2.722418 |
| H | 0.805933  | 2.966806  | 2.796193  |
| H | -3.609344 | -4.055721 | 1.175274  |
| H | 2.864575  | -1.226063 | 2.896574  |

**Pt-U-IIb4 (M1 1L, SMD water)**

|    |           |           |           |
|----|-----------|-----------|-----------|
| Pt | 3.649133  | 1.846264  | -0.110158 |
| Pt | -1.909718 | 3.660345  | -0.202083 |
| Pt | -3.848304 | -1.822627 | 0.374005  |
| Pt | 1.632688  | -3.670907 | -0.737793 |
| C  | -2.680179 | 0.528648  | -2.997633 |
| C  | -0.362347 | -2.362732 | 2.786971  |
| C  | 4.894093  | -1.958730 | 1.366898  |
| C  | 0.627544  | 2.226743  | 2.902743  |
| H  | 5.693237  | -2.336834 | 1.994264  |
| H  | 0.550988  | 2.094540  | 3.976350  |
| H  | -0.086829 | -2.230446 | 3.826961  |
| N  | 1.892339  | 2.123772  | 0.886502  |
| N  | -0.352213 | 2.859599  | 0.828911  |
| N  | 3.770395  | -0.143432 | 0.307513  |
| N  | 2.966293  | -2.343072 | 0.023232  |
| N  | 0.220537  | -2.999972 | 0.566049  |
| N  | -1.972277 | -2.259323 | 1.037561  |
| N  | -2.410031 | 1.884201  | -1.058628 |
| N  | -3.174556 | -0.336625 | -0.837286 |
| C  | -3.083513 | -0.479547 | -2.174243 |
| C  | -0.422632 | 2.680177  | 2.165614  |
| C  | 2.854227  | -1.001550 | -0.224771 |
| O  | 1.921094  | -0.573856 | -0.968003 |
| C  | 0.812660  | 2.563547  | 0.180691  |
| O  | 0.893179  | 2.727826  | -1.078288 |
| C  | -1.051900 | -2.720498 | 0.147800  |
| O  | -1.374316 | -2.909632 | -1.065425 |
| C  | -2.851826 | 0.864607  | -0.270620 |
| O  | -2.986461 | 1.026006  | 0.979943  |
| N  | 0.321996  | -5.085096 | -1.476021 |
| H  | 0.592675  | -5.449219 | -2.387028 |
| H  | 0.230254  | -5.872564 | -0.838907 |
| N  | 3.091339  | -4.346631 | -2.032126 |
| H  | 3.014648  | -5.344543 | -2.221841 |
| H  | 3.025302  | -3.856656 | -2.922917 |
| N  | 3.539147  | 3.858030  | -0.571742 |

|   |           |           |           |
|---|-----------|-----------|-----------|
| H | 3.541897  | 4.426143  | 0.272855  |
| H | 4.290152  | 4.189470  | -1.173042 |
| N | 5.457175  | 1.600459  | -1.081484 |
| H | 5.371607  | 0.943334  | -1.853481 |
| H | 5.857619  | 2.461103  | -1.450061 |
| N | -1.424359 | 5.483266  | 0.644377  |
| H | -2.250042 | 6.026373  | 0.892156  |
| H | -0.873464 | 5.357961  | 1.491974  |
| N | -3.468317 | 4.495841  | -1.265422 |
| H | -3.503378 | 5.511972  | -1.219183 |
| H | -3.321714 | 4.216940  | -2.236588 |
| N | -4.537194 | -3.283495 | 1.658909  |
| H | -5.545422 | -3.274773 | 1.798094  |
| H | -4.272834 | -4.218844 | 1.357962  |
| N | -5.744910 | -1.373219 | -0.317312 |
| H | -6.482908 | -1.937164 | 0.099680  |
| H | -5.957706 | -0.394903 | -0.129109 |
| H | -0.869982 | 6.041951  | -0.002131 |
| H | -4.369313 | 4.138838  | -0.954895 |
| H | -4.085193 | -3.084881 | 2.553582  |
| H | -5.787514 | -1.509644 | -1.325931 |
| H | -0.579863 | -4.611042 | -1.559525 |
| H | 4.024141  | -4.177728 | -1.658800 |
| H | 6.100699  | 1.208888  | -0.392203 |
| H | 2.649767  | 3.998305  | -1.052456 |
| C | 0.536292  | -2.809434 | 1.866095  |
| C | 1.857907  | 1.947985  | 2.247919  |
| O | 2.906639  | 1.577969  | 2.862584  |
| C | 3.966607  | -2.787813 | 0.815547  |
| C | -2.329796 | 1.778081  | -2.423641 |
| O | -1.970824 | 2.794560  | -3.103802 |
| H | -2.625428 | 0.395609  | -4.072299 |
| H | -3.361883 | -1.457763 | -2.563729 |
| H | -1.378656 | 2.930253  | 2.624220  |
| C | -1.687720 | -2.080316 | 2.367848  |
| O | -2.614629 | -1.695753 | 3.152503  |
| C | 4.811073  | -0.567894 | 1.093461  |
| O | 5.654165  | 0.283560  | 1.524432  |
| H | 1.561222  | -3.052855 | 2.145692  |
| H | 3.990360  | -3.864857 | 0.983776  |

**Pt-U-IIIb1 (M1 1L, SMD water)**

|    |           |           |           |
|----|-----------|-----------|-----------|
| Pt | 2.739464  | -2.900820 | -0.403865 |
| Pt | 2.737887  | 3.043965  | -0.480039 |
| Pt | -3.076431 | 2.968656  | 0.128154  |
| Pt | -3.079431 | -2.907865 | 0.143931  |
| C  | -1.122431 | -2.377192 | 2.306203  |
| C  | -2.821767 | 0.023917  | -2.932217 |
| H  | -2.055032 | -2.270393 | 2.859762  |
| C  | 0.089221  | -2.311472 | 2.921954  |
| C  | -1.086554 | 2.507556  | 2.268074  |
| C  | 5.340809  | 0.110666  | 1.125921  |
| H  | -2.011856 | 2.368009  | 2.826204  |
| C  | 0.129500  | 2.470957  | 2.876778  |
| C  | 4.697007  | 1.254497  | 0.766768  |
| H  | 5.096660  | 2.236601  | 1.020411  |
| H  | 6.278182  | 0.131497  | 1.670227  |
| H  | 0.224803  | 2.301256  | 3.943627  |
| H  | 0.174495  | -2.148971 | 3.990857  |
| N  | 1.119288  | 2.853585  | 0.744421  |

|   |           |           |           |
|---|-----------|-----------|-----------|
| N | -1.230567 | 2.733311  | 0.942263  |
| N | 3.534270  | 1.258045  | 0.081161  |
| N | 3.565581  | -1.101333 | 0.095176  |
| N | 1.102655  | -2.663322 | 0.794270  |
| N | -1.252728 | -2.591763 | 0.978437  |
| N | -2.973103 | 1.203299  | -0.868194 |
| N | -3.037021 | -1.149793 | -0.872073 |
| C | -2.833394 | 1.179023  | -2.210746 |
| H | -2.724108 | 0.029344  | -4.011996 |
| H | -2.739671 | 2.153136  | -2.691253 |
| C | 4.765415  | -1.132090 | 0.758152  |
| O | 5.314720  | -2.257042 | 1.000673  |
| C | 1.266696  | -2.506183 | 2.147843  |
| O | 2.429769  | -2.561861 | 2.654992  |
| C | -2.949484 | -1.207862 | -2.239472 |
| O | -3.000731 | -2.344356 | -2.812394 |
| C | 1.297421  | 2.695673  | 2.096615  |
| O | 2.462419  | 2.775282  | 2.593922  |
| C | 2.945272  | 0.066234  | -0.244197 |
| O | 1.845294  | 0.054591  | -0.875063 |
| C | -0.128741 | -2.700840 | 0.211363  |
| O | -0.235349 | -2.868344 | -1.044975 |
| C | -0.115664 | 2.878198  | 0.169868  |
| O | -0.234085 | 3.065561  | -1.082437 |
| C | -3.072462 | 0.024334  | -0.184266 |
| O | -3.210859 | 0.032383  | 1.076655  |
| N | 1.970737  | 4.870053  | -1.062079 |
| H | 2.036147  | 5.557937  | -0.315214 |
| H | 2.417870  | 5.265026  | -1.887005 |
| N | 4.374397  | 3.239859  | -1.733265 |
| H | 4.315008  | 2.562109  | -2.491136 |
| H | 4.453333  | 4.164150  | -2.154115 |
| N | 4.415346  | -3.186233 | -1.578132 |
| H | 5.213446  | -3.029612 | -0.960616 |
| H | 4.491377  | -4.119799 | -1.976428 |
| N | 1.930806  | -4.723080 | -0.953093 |
| H | 0.961811  | -4.531175 | -1.214356 |
| H | 2.400368  | -5.159772 | -1.743996 |
| N | -4.910136 | -3.253306 | -0.739677 |
| H | -5.252874 | -4.205951 | -0.635903 |
| H | -5.625976 | -2.623884 | -0.384569 |
| N | -3.129773 | -4.704997 | 1.170765  |
| H | -3.835673 | -5.347308 | 0.814717  |
| H | -2.228228 | -5.174754 | 1.107804  |
| N | -4.964960 | 3.225222  | -0.665889 |
| H | -5.613823 | 2.554860  | -0.256947 |
| H | -5.344543 | 4.157038  | -0.506039 |
| N | -3.218120 | 4.784161  | 1.101857  |
| H | -3.132439 | 5.555104  | 0.441919  |
| H | -4.110218 | 4.886237  | 1.583349  |
| H | 5.242075  | 3.062376  | -1.229399 |
| H | 0.985960  | 4.700396  | -1.275646 |
| H | 1.940557  | -5.385721 | -0.181241 |
| H | 4.456097  | -2.517488 | -2.343471 |
| H | -4.773318 | -3.068617 | -1.734404 |
| H | -3.327995 | -4.546844 | 2.157470  |
| H | -2.481171 | 4.891775  | 1.797352  |
| H | -4.958603 | 3.068321  | -1.672577 |

Pt-U-IIIb2 (M1 1L, SMD water)

|    |           |           |           |
|----|-----------|-----------|-----------|
| Pt | -2.902393 | 2.981840  | -0.449225 |
| Pt | -2.878882 | -2.866453 | -0.338690 |
| Pt | 2.992624  | -2.885855 | 0.004285  |
| Pt | 2.970099  | 2.968635  | 0.038500  |
| C  | 2.576336  | 0.063875  | -3.058006 |
| C  | -0.227868 | 2.633634  | 2.840647  |
| C  | -5.048248 | 0.098150  | 1.839487  |
| C  | -0.136687 | -2.436095 | 2.880288  |
| H  | -5.814378 | 0.118442  | 2.606085  |
| H  | -0.213057 | -2.307520 | 3.954218  |
| H  | -0.328468 | 2.504525  | 3.912463  |
| N  | -1.177669 | -2.666722 | 0.752127  |
| N  | 1.177522  | -2.695910 | 0.911006  |
| N  | -3.591758 | -1.110582 | 0.394618  |
| N  | -3.585169 | 1.247919  | 0.354248  |
| N  | -1.223017 | 2.876211  | 0.690590  |
| N  | 1.126985  | 2.876616  | 0.898591  |
| N  | 2.821721  | -1.129755 | -1.011905 |
| N  | 2.737181  | 1.227587  | -0.986723 |
| H  | 2.470564  | 0.077522  | -4.137071 |
| C  | -4.539690 | 1.244613  | 1.309816  |
| C  | -1.317446 | 2.701944  | 2.026744  |
| C  | 2.593162  | 1.214398  | -2.328110 |
| C  | -1.244390 | -2.495989 | 2.090083  |
| C  | -3.092447 | 0.056302  | -0.101140 |
| O  | -2.186914 | 0.044675  | -0.989118 |
| C  | 0.016121  | 2.967295  | 0.119521  |
| O  | 0.119826  | 3.154995  | -1.133044 |
| C  | 0.048568  | -2.750584 | 0.152505  |
| O  | 0.121486  | -2.904728 | -1.106674 |
| C  | 2.844356  | 0.041043  | -0.315276 |
| O  | 2.981426  | 0.039816  | 0.945647  |
| N  | -2.133603 | -4.640021 | -1.096768 |
| H  | -2.127033 | -5.374557 | -0.393073 |
| H  | -2.644550 | -4.989213 | -1.904830 |
| N  | -4.639943 | -3.095541 | -1.391894 |
| H  | -4.610259 | -2.578783 | -2.268798 |
| H  | -4.839326 | -4.070132 | -1.612677 |
| N  | -4.637325 | 3.077749  | -1.561413 |
| H  | -5.449242 | 2.899605  | -0.972221 |
| H  | -4.776771 | 3.980772  | -2.012146 |
| N  | -2.215928 | 4.744563  | -1.272847 |
| H  | -1.228249 | 4.581879  | -1.482138 |
| H  | -2.695387 | 5.005343  | -2.131716 |
| N  | 4.844410  | 3.059446  | -0.827679 |
| H  | 5.445534  | 3.778902  | -0.430806 |
| H  | 5.317800  | 2.164381  | -0.714460 |
| N  | 3.261050  | 4.701550  | 1.118575  |
| H  | 4.216903  | 5.050251  | 1.092776  |
| H  | 2.647022  | 5.451633  | 0.810682  |
| N  | 4.799742  | -3.118602 | -0.967842 |
| H  | 5.480989  | -2.427939 | -0.661702 |
| H  | 5.217161  | -4.040231 | -0.854730 |
| N  | 3.216017  | -4.635035 | 1.083111  |
| H  | 2.558780  | -5.352428 | 0.786395  |
| H  | 4.152381  | -5.030650 | 1.029196  |
| H  | -5.421584 | -2.738142 | -0.845653 |
| H  | -1.170953 | -4.440394 | -1.376989 |
| H  | -2.296403 | 5.521956  | -0.622007 |
| H  | -4.626952 | 2.367463  | -2.291196 |

|   |           |           |           |
|---|-----------|-----------|-----------|
| H | 4.764638  | 3.242318  | -1.826636 |
| H | 3.028912  | 4.460449  | 2.084154  |
| H | 3.020620  | -4.392619 | 2.055550  |
| H | 4.605080  | -2.970944 | -1.958932 |
| H | 2.498241  | 2.192124  | -2.800941 |
| C | 2.720159  | -1.174199 | -2.378249 |
| O | 2.776956  | -2.303336 | -2.966429 |
| C | 1.141117  | -2.557554 | 2.275467  |
| O | 2.235112  | -2.564102 | 2.927746  |
| H | -2.249955 | -2.425234 | 2.506144  |
| H | -2.329316 | 2.631180  | 2.424912  |
| C | 1.063052  | 2.733470  | 2.261968  |
| O | 2.145563  | 2.713406  | 2.932132  |
| C | -4.563902 | -1.148145 | 1.360611  |
| O | -4.984110 | -2.276135 | 1.772876  |
| H | -4.885117 | 2.227104  | 1.632484  |

**Pt-U-IVb (M11L, SMD water)**

|    |           |           |           |
|----|-----------|-----------|-----------|
| Pt | -0.488030 | -3.680923 | -0.559830 |
| Pt | 4.453225  | -0.599315 | 0.313485  |
| Pt | 0.667999  | 3.785358  | -0.121990 |
| Pt | -4.354440 | 0.812752  | -0.252093 |
| C  | -0.309085 | 1.868174  | 1.944295  |
| C  | 2.622380  | 1.341580  | -3.016954 |
| H  | 0.682548  | 2.063363  | 2.350397  |
| C  | -1.241539 | 1.158635  | 2.637912  |
| C  | -4.224182 | -3.127047 | 1.337371  |
| C  | 1.089861  | -1.556457 | 2.778679  |
| C  | -3.001516 | -3.553348 | 0.920712  |
| C  | 0.291230  | -2.218378 | 1.895578  |
| H  | -0.684319 | -2.604274 | 2.191497  |
| H  | -2.596257 | -4.518151 | 1.227942  |
| H  | -4.844775 | -3.729190 | 1.992076  |
| H  | 0.777110  | -1.386173 | 3.803024  |
| H  | -1.028586 | 0.762078  | 3.624760  |
| N  | 0.653666  | -2.458117 | 0.615097  |
| N  | 2.680829  | -1.306532 | 1.028301  |
| N  | -2.214057 | -2.829877 | 0.093339  |
| N  | -3.845166 | -1.127598 | 0.097307  |
| N  | -2.705204 | 1.411819  | 0.778781  |
| N  | -0.557236 | 2.395023  | 0.723358  |
| N  | 3.472856  | 0.712036  | -0.886840 |
| N  | 1.839875  | 2.405157  | -1.035396 |
| C  | 1.809031  | 2.225354  | -2.373418 |
| H  | 1.093850  | 2.844852  | -2.914033 |
| H  | 2.595592  | 1.227874  | -4.094937 |
| C  | -4.683667 | -1.858807 | 0.897884  |
| O  | -5.823088 | -1.380871 | 1.207034  |
| C  | -2.523182 | 0.949494  | 2.059414  |
| O  | -3.481663 | 0.380540  | 2.666751  |
| C  | 3.509698  | 0.544254  | -2.245189 |
| O  | 4.324347  | -0.298471 | -2.743759 |
| C  | 2.361873  | -1.098987 | 2.345950  |
| O  | 3.209416  | -0.534174 | 3.109769  |
| C  | -2.635840 | -1.595505 | -0.323171 |
| O  | -1.912508 | -0.917327 | -1.113866 |
| C  | -1.763145 | 2.147356  | 0.131073  |
| O  | -2.005221 | 2.628483  | -1.023567 |
| C  | 2.705529  | 1.659514  | -0.284330 |
| O  | 2.805463  | 1.873374  | 0.960470  |

|   |           |           |           |
|---|-----------|-----------|-----------|
| C | 1.853012  | -1.963134 | 0.170841  |
| O | 2.197751  | -2.142538 | -1.038932 |
| H | 1.050894  | -5.210741 | -2.057272 |
| H | 1.910566  | -3.965962 | -1.364722 |
| H | 1.536848  | -5.331734 | -0.490651 |
| H | -1.409516 | -5.936928 | -1.510479 |
| H | -2.628570 | -4.834316 | -1.514860 |
| H | -1.484236 | -4.795558 | -2.693421 |
| H | -5.520527 | 2.929126  | -1.325125 |
| H | -5.141424 | 3.265308  | 0.240614  |
| H | -3.938818 | 3.215549  | -0.905245 |
| H | -6.712228 | 0.874241  | -1.456960 |
| H | -5.797288 | -0.318963 | -2.126564 |
| H | -6.457876 | -0.536942 | -0.621554 |
| H | -0.449681 | 5.103409  | 1.812310  |
| H | -0.307286 | 6.152250  | 0.554091  |
| H | -1.512095 | 5.034753  | 0.559738  |
| H | 2.447057  | 4.876550  | -1.695016 |
| H | 1.321062  | 6.016617  | -1.330794 |
| H | 2.496723  | 5.641216  | -0.242428 |
| H | 6.442181  | 1.031963  | -0.208031 |
| H | 7.032462  | -0.502303 | -0.274891 |
| H | 6.077002  | 0.067820  | -1.505173 |
| H | 5.228557  | -2.878683 | 1.347793  |
| H | 6.405243  | -1.773249 | 1.664190  |
| H | 4.991579  | -1.739844 | 2.523213  |
| N | 1.200604  | -4.684076 | -1.199540 |
| N | -1.634732 | -4.961375 | -1.699548 |
| N | 6.226857  | 0.079879  | -0.494978 |
| N | 5.398374  | -1.908045 | 1.602100  |
| N | 1.869763  | 5.250836  | -0.943694 |
| N | -0.534622 | 5.190280  | 0.800888  |
| N | -4.818723 | 2.793627  | -0.600519 |
| N | -6.032693 | 0.144635  | -1.252543 |

**Pt-U-Ic (M11L, SMD water)**

|    |           |           |           |
|----|-----------|-----------|-----------|
| Pt | 0.762003  | 3.601911  | -0.007060 |
| Pt | 0.223509  | -0.064063 | 4.653211  |
| Pt | -0.762003 | -3.601911 | 0.007060  |
| Pt | -0.223509 | 0.064063  | -4.653211 |
| C  | 2.492410  | -3.084470 | 2.732880  |
| C  | -2.510774 | 2.187021  | 2.330684  |
| C  | -1.700285 | 2.795257  | 1.422633  |
| H  | -2.095568 | 3.489447  | 0.682421  |
| C  | 1.700285  | -2.795257 | -1.422633 |
| C  | -2.492410 | 3.084470  | -2.732880 |
| H  | 2.095568  | -3.489447 | -0.682421 |
| C  | 2.510774  | -2.187021 | -2.330684 |
| C  | -2.050258 | 2.022337  | -3.459803 |
| H  | -2.690659 | 1.539414  | -4.197610 |
| H  | -3.481354 | 3.503487  | -2.884779 |
| H  | 3.582160  | -2.355136 | -2.333488 |
| H  | -3.582160 | 2.355136  | 2.333488  |
| N  | 0.567334  | -1.168449 | -3.245666 |
| N  | 0.360944  | -2.605151 | -1.383054 |
| N  | -0.804928 | 1.507424  | -3.337193 |
| N  | -0.432408 | 3.009053  | -1.551715 |
| N  | -0.360944 | 2.605151  | 1.383054  |
| N  | -0.567334 | 1.168449  | 3.245666  |
| N  | 0.432408  | -3.009053 | 1.551715  |



|                                    |           |           |           |
|------------------------------------|-----------|-----------|-----------|
| N                                  | 0.804928  | -1.507424 | 3.337193  |
| C                                  | 2.050258  | -2.022337 | 3.459803  |
| H                                  | 2.690659  | -1.539414 | 4.197610  |
| H                                  | 3.481354  | -3.503487 | 2.884779  |
| C                                  | -1.623894 | 3.650843  | -1.764709 |
| O                                  | -1.904106 | 4.692619  | -1.088945 |
| C                                  | -1.931429 | 1.322906  | 3.292198  |
| O                                  | -2.595499 | 0.711151  | 4.187533  |
| C                                  | 1.623894  | -3.650843 | 1.764709  |
| O                                  | 1.904106  | -4.692619 | 1.088945  |
| C                                  | 1.931429  | -1.322906 | -3.292198 |
| O                                  | 2.595499  | -0.711151 | -4.187533 |
| C                                  | 0.026248  | 2.019949  | -2.376801 |
| O                                  | 1.215366  | 1.603978  | -2.257697 |
| C                                  | 0.210313  | 1.769030  | 2.306882  |
| O                                  | 1.468043  | 1.573727  | 2.293626  |
| C                                  | -0.026248 | -2.019949 | 2.376801  |
| O                                  | -1.215366 | -1.603978 | 2.257697  |
| C                                  | -0.210313 | -1.769030 | -2.306882 |
| O                                  | -1.468043 | -1.573727 | -2.293626 |
| N                                  | 1.862489  | 4.605434  | -1.430495 |
| H                                  | 2.748174  | 4.970991  | -1.084830 |
| H                                  | 2.064359  | 3.962806  | -2.195569 |
| N                                  | 1.996933  | 4.227302  | 1.527364  |
| H                                  | 2.889182  | 4.595498  | 1.203269  |
| H                                  | 1.551112  | 4.945020  | 2.093772  |
| N                                  | -0.953639 | 1.273364  | -6.170497 |
| H                                  | -0.427883 | 1.150411  | -7.034514 |
| H                                  | -1.929345 | 1.061332  | -6.374993 |
| N                                  | 0.302745  | -1.359431 | -6.051489 |
| H                                  | -0.490737 | -1.635416 | -6.627300 |
| H                                  | 1.030929  | -1.005446 | -6.668824 |
| N                                  | -1.996933 | -4.227302 | -1.527364 |
| H                                  | -1.551112 | -4.945020 | -2.093772 |
| H                                  | -2.889182 | -4.595498 | -1.203269 |
| N                                  | -1.862489 | -4.605434 | 1.430495  |
| H                                  | -2.064359 | -3.962806 | 2.195569  |
| H                                  | -2.748174 | -4.970991 | 1.084830  |
| N                                  | 0.953639  | -1.273364 | 6.170497  |
| H                                  | 1.929345  | -1.061332 | 6.374993  |
| H                                  | 0.427883  | -1.150411 | 7.034514  |
| N                                  | -0.302745 | 1.359431  | 6.051489  |
| H                                  | -1.030929 | 1.005446  | 6.668824  |
| H                                  | 0.490737  | 1.635416  | 6.627300  |
| H                                  | -0.665466 | 2.195745  | 5.597326  |
| H                                  | 0.897608  | -2.259531 | 5.919875  |
| H                                  | -2.167866 | -3.401599 | -2.105348 |
| H                                  | -1.329456 | -5.386257 | 1.807862  |
| H                                  | -0.897608 | 2.259531  | -5.919875 |
| H                                  | 0.665466  | -2.195745 | -5.597326 |
| H                                  | 1.329456  | 5.386257  | -1.807862 |
| H                                  | 2.167866  | 3.401599  | 2.105348  |
| <b>Pt-U-IIc1 (M11L, SMD water)</b> |           |           |           |
| Pt                                 | -0.211285 | -3.811540 | -0.846575 |
| Pt                                 | -4.491483 | 0.141535  | 0.165672  |
| Pt                                 | 0.087573  | 3.848944  | 0.373851  |
| Pt                                 | 4.493414  | -0.244061 | 0.286657  |
| C                                  | -2.194584 | 2.087839  | -2.812128 |
| C                                  | -2.132790 | -2.360010 | 2.673827  |

|   |           |           |           |
|---|-----------|-----------|-----------|
| C | -1.386854 | -3.043421 | 1.762955  |
| H | -0.670096 | -3.800916 | 2.073282  |
| C | 2.587823  | -3.397634 | 2.323315  |
| C | 3.453723  | 3.043198  | -2.096285 |
| C | 3.250106  | -2.269017 | 1.955340  |
| C | 3.859127  | 1.834889  | -1.625652 |
| H | 4.655376  | 1.277716  | -2.120189 |
| H | 3.956980  | -1.790025 | 2.632274  |
| H | 2.766239  | -3.873745 | 3.281292  |
| H | 3.921588  | 3.502239  | -2.960174 |
| H | -2.026639 | -2.538094 | 3.738067  |
| N | 3.337031  | 1.252717  | -0.516672 |
| N | 1.774788  | 3.020114  | -0.417035 |
| N | 3.097409  | -1.673582 | 0.746909  |
| N | 1.388250  | -3.234700 | 0.280587  |
| N | -1.496932 | -2.856581 | 0.428112  |
| N | -3.168195 | -1.241084 | 0.851063  |
| N | -1.207985 | 2.704990  | -0.728075 |
| N | -3.049099 | 1.223500  | -0.767236 |
| C | -3.062566 | 1.307620  | -2.115772 |
| H | -3.827791 | 0.713727  | -2.615723 |
| H | -2.232513 | 2.155923  | -3.893725 |
| C | 1.664334  | -3.962542 | 1.408272  |
| O | 1.070432  | -5.072392 | 1.597429  |
| C | -3.060125 | -1.395936 | 2.209869  |
| O | -3.797888 | -0.692553 | 2.974752  |
| C | -1.246077 | 2.865325  | -2.093373 |
| O | -0.466539 | 3.693713  | -2.654008 |
| C | 2.432185  | 3.730451  | -1.389143 |
| O | 2.109755  | 4.938088  | -1.614841 |
| C | -2.429832 | -1.965384 | -0.033792 |
| O | -2.612612 | -1.832979 | -1.284133 |
| C | 2.125875  | -2.145951 | -0.094861 |
| O | 1.916352  | -1.595522 | -1.215872 |
| C | 2.230026  | 1.822592  | 0.056628  |
| O | 1.642749  | 1.256175  | 1.026720  |
| C | -2.096861 | 1.907419  | -0.067496 |
| O | -2.059382 | 1.826770  | 1.200933  |
| N | 1.131442  | -4.755729 | -2.092872 |
| H | 0.710912  | -5.148324 | -2.933195 |
| H | 1.846592  | -4.092018 | -2.385490 |
| N | -1.824967 | -4.425583 | -1.981041 |
| H | -1.578022 | -4.713926 | -2.925417 |
| H | -2.315379 | -5.198545 | -1.536992 |
| N | -5.974110 | -0.934359 | 1.117153  |
| H | -6.884468 | -0.479467 | 1.112388  |
| H | -6.084875 | -1.860530 | 0.710675  |
| N | -5.875959 | 1.518185  | -0.517393 |
| H | -6.621374 | 1.061215  | -1.040470 |
| H | -6.307297 | 2.021010  | 0.256609  |
| N | -1.595452 | 4.703516  | 1.215227  |
| H | -2.194940 | 3.933842  | 1.515667  |
| H | -1.390544 | 5.286675  | 2.024332  |
| N | 1.376649  | 5.058094  | 1.438216  |
| H | 2.042600  | 5.452112  | 0.774052  |
| H | 0.919394  | 5.828398  | 1.922211  |
| N | 5.889321  | -1.624988 | 0.935049  |
| H | 5.558325  | -2.582815 | 0.831247  |
| H | 6.750568  | -1.544451 | 0.395397  |
| N | 6.067535  | 1.074646  | 0.037693  |

|   |           |           |           |
|---|-----------|-----------|-----------|
| H | 5.758893  | 2.046032  | 0.040431  |
| H | 6.743190  | 0.972332  | 0.794477  |
| H | -5.658911 | -1.035147 | 2.083603  |
| H | 1.596083  | -5.513517 | -1.595412 |
| H | -2.444999 | -3.613769 | -2.029574 |
| H | 6.130175  | -1.484205 | 1.915498  |
| H | 6.562425  | 0.907866  | -0.837805 |
| H | -2.103109 | 5.272765  | 0.542101  |
| H | 1.895320  | 4.517266  | 2.127047  |
| H | -5.446917 | 2.208801  | -1.131554 |

**Pt-U-IIc2 (M1 1L, SMD water)**

|    |           |           |           |
|----|-----------|-----------|-----------|
| Pt | 0.183253  | 3.560462  | 0.630259  |
| Pt | -4.640497 | 0.141687  | -0.080939 |
| Pt | -0.164991 | -3.668119 | -0.460369 |
| Pt | 4.680345  | -0.244221 | -0.143590 |
| C  | -2.661222 | -2.335684 | 2.768264  |
| C  | -2.049661 | 2.210328  | -2.746739 |
| C  | -1.167596 | 2.800022  | -1.893948 |
| H  | -0.373922 | 3.449473  | -2.257379 |
| C  | 2.926167  | 2.763996  | -2.547838 |
| C  | 2.505734  | -2.545768 | 2.680333  |
| C  | 3.565316  | 1.664342  | -2.065436 |
| H  | 4.262234  | 1.102495  | -2.687093 |
| H  | 3.111368  | 3.134618  | -3.549875 |
| H  | 2.610465  | -2.776615 | 3.734278  |
| H  | -1.978632 | 2.351655  | -3.819603 |
| N  | 3.270602  | -1.445529 | 0.712146  |
| N  | 1.369902  | -2.844307 | 0.606528  |
| N  | 3.404301  | 1.206919  | -0.801424 |
| N  | 1.728453  | 2.844323  | -0.497490 |
| N  | -1.224746 | 2.649863  | -0.550811 |
| N  | -3.133846 | 1.284623  | -0.843261 |
| N  | -1.611784 | -2.768868 | 0.673594  |
| N  | -3.382413 | -1.202973 | 0.801876  |
| H  | -2.754976 | -2.537477 | 3.829333  |
| C  | 2.009892  | 3.438663  | -1.700271 |
| O  | 1.434614  | 4.531109  | -2.009936 |
| C  | -3.083096 | 1.406526  | -2.209046 |
| O  | -3.965707 | 0.821450  | -2.920175 |
| C  | -1.756396 | -2.996654 | 1.996084  |
| C  | 1.535301  | -3.117838 | 1.918098  |
| C  | -2.230209 | 1.883515  | -0.019593 |
| O  | -2.327972 | 1.751755  | 1.241678  |
| C  | 2.472399  | 1.809826  | -0.000343 |
| O  | 2.302181  | 1.433587  | 1.196830  |
| C  | 2.272355  | -2.017682 | -0.012681 |
| O  | 2.181047  | -1.819077 | -1.264741 |
| C  | -2.472242 | -1.892369 | 0.060591  |
| O  | -2.419737 | -1.751345 | -1.200280 |
| N  | 1.628435  | 4.457808  | 1.791210  |
| H  | 1.276098  | 4.836747  | 2.668684  |
| H  | 2.337885  | 3.759005  | 2.010215  |
| N  | -1.352093 | 4.312300  | 1.790726  |
| H  | -1.053691 | 4.603257  | 2.719453  |
| H  | -1.799973 | 5.108322  | 1.342566  |
| N  | -5.937481 | 1.484545  | -0.962972 |
| H  | -6.912970 | 1.194141  | -0.946036 |
| H  | -5.877727 | 2.400558  | -0.524376 |
| N  | -6.201804 | -0.982574 | 0.670653  |

|   |           |           |           |
|---|-----------|-----------|-----------|
| H | -7.116497 | -0.551492 | 0.553556  |
| H | -6.237215 | -1.906707 | 0.246949  |
| N | -1.706714 | -4.499791 | -1.544979 |
| H | -2.314669 | -3.717050 | -1.795275 |
| H | -1.409508 | -4.971615 | -2.396148 |
| N | 1.286851  | -4.537044 | -1.639058 |
| H | 1.775337  | -5.284083 | -1.149860 |
| H | 0.929215  | -4.917593 | -2.513558 |
| N | 6.210671  | 0.910119  | -0.928136 |
| H | 5.973802  | 1.901492  | -0.915154 |
| H | 7.074391  | 0.800469  | -0.398601 |
| N | 6.038650  | -1.664905 | 0.484476  |
| H | 5.902252  | -2.549312 | 0.000320  |
| H | 7.012455  | -1.393779 | 0.364286  |
| H | -5.636845 | 1.562037  | -1.935603 |
| H | 2.078818  | 5.216493  | 1.282789  |
| H | -2.028048 | 3.550224  | 1.884379  |
| H | 6.412705  | 0.653051  | -1.893637 |
| H | 5.865583  | -1.804836 | 1.481195  |
| H | -2.238727 | -5.166842 | -0.990704 |
| H | 1.950462  | -3.790258 | -1.856020 |
| H | -6.011402 | -1.082349 | 1.668894  |
| C | 3.403526  | -1.640728 | 2.064420  |
| O | 4.338973  | -1.041657 | 2.688949  |
| H | 0.856129  | -3.853680 | 2.341663  |
| C | -3.495275 | -1.365821 | 2.159989  |
| O | -4.350397 | -0.673151 | 2.803242  |
| H | -1.119777 | -3.766406 | 2.424773  |

**Pt-U-IIIc1 (M1 1L, SMD water)**

|    |           |           |           |
|----|-----------|-----------|-----------|
| Pt | -0.308718 | 3.743725  | -0.447685 |
| Pt | -4.480747 | -0.553907 | -0.107229 |
| Pt | 0.450011  | -3.802837 | 0.723392  |
| Pt | 4.530502  | 0.343243  | -0.049434 |
| C  | 2.919708  | 1.399604  | 2.147673  |
| C  | 2.741525  | -2.510653 | -2.660275 |
| H  | 3.685796  | 0.833318  | 2.677849  |
| C  | 1.996621  | 2.145781  | 2.807734  |
| C  | -1.202170 | -3.550873 | -1.732066 |
| C  | -3.544917 | 2.859842  | 2.164638  |
| H  | -0.526535 | -4.342825 | -2.044240 |
| C  | -2.119669 | -3.032848 | -2.591736 |
| C  | -3.888599 | 1.608386  | 1.761603  |
| H  | -4.607511 | 1.015528  | 2.326822  |
| H  | -3.996515 | 3.320677  | 3.036284  |
| H  | -2.183393 | -3.360687 | -3.623078 |
| N  | 1.988193  | 2.215536  | 3.889799  |
| H  | -2.962448 | -1.750265 | -0.768653 |
| N  | -1.086794 | -3.147427 | -0.449292 |
| N  | -3.396549 | 1.023427  | 0.640297  |
| N  | -1.939994 | 2.871679  | 0.416513  |
| N  | 1.062126  | 2.720620  | 0.685256  |
| N  | 2.963511  | 1.319284  | 0.799385  |
| N  | 1.858646  | -2.940429 | -0.487819 |
| N  | 3.392443  | -1.168648 | -0.806109 |
| C  | 1.972311  | -3.233671 | -1.800996 |
| H  | 2.816627  | -2.770247 | -3.710202 |
| H  | 1.426561  | -4.108809 | -2.144581 |
| C  | -2.605501 | 3.583299  | 1.381753  |
| O  | -2.359810 | 4.819128  | 1.537654  |

|   |           |           |           |
|---|-----------|-----------|-----------|
| C | 1.052010  | 2.891338  | 2.050958  |
| O | 0.232136  | 3.698873  | 2.581190  |
| C | 3.451874  | -1.391473 | -2.159402 |
| O | 4.159891  | -0.620885 | -2.886110 |
| C | -3.015963 | -2.048315 | -2.109421 |
| O | -3.885427 | -1.472109 | -2.842181 |
| C | 2.012818  | 1.963110  | 0.061954  |
| O | 2.029496  | 1.871224  | -1.207192 |
| C | -2.368170 | 1.649164  | -0.017603 |
| O | -1.827469 | 1.111156  | -1.029138 |
| C | -2.007588 | -2.262566 | 0.051434  |
| O | -1.969147 | -1.948830 | 1.281500  |
| C | 2.644088  | -1.941053 | 0.028546  |
| O | 2.684817  | -1.762852 | 1.284407  |
| N | 1.312543  | 4.641004  | -1.361140 |
| H | 1.915623  | 3.877883  | -1.673464 |
| H | 1.063744  | 5.215861  | -2.163683 |
| N | -1.690026 | 4.811566  | -1.543336 |
| H | -2.291928 | 5.298313  | -0.880089 |
| H | -1.289657 | 5.499923  | -2.177497 |
| N | 5.715405  | 1.858020  | 0.711908  |
| H | 6.051605  | 1.620006  | 1.643643  |
| H | 6.528811  | 2.054412  | 0.130838  |
| N | 6.167611  | -0.615701 | -0.861166 |
| H | 7.022315  | -0.062764 | -0.843115 |
| H | 6.357378  | -1.494094 | -0.384514 |
| N | -0.994254 | -4.597275 | 1.959733  |
| H | -1.510574 | -5.343464 | 1.498600  |
| H | -0.634169 | -4.964556 | 2.838728  |
| N | 1.998433  | -4.453697 | 1.916128  |
| H | 2.604729  | -3.638850 | 2.029912  |
| H | 1.704203  | -4.775961 | 2.835667  |
| N | -6.178316 | 0.544508  | 0.356988  |
| H | -6.559566 | 0.292771  | 1.267671  |
| H | -6.000704 | 1.547935  | 0.361452  |
| N | -5.685065 | -2.088595 | -0.776081 |
| H | -6.675054 | -1.964256 | -0.575596 |
| H | -5.555253 | -2.145725 | -1.786710 |
| H | -6.906200 | 0.375274  | -0.337147 |
| H | 2.526094  | -5.203258 | 1.474938  |
| H | 5.927410  | -0.811117 | -1.834441 |
| H | 5.178924  | 2.720871  | 0.788300  |
| H | 1.832592  | 5.223762  | -0.709268 |
| H | -2.271328 | 4.180610  | -2.091975 |
| H | -5.393441 | -2.972009 | -0.362890 |
| H | -1.637567 | -3.828124 | 2.158449  |

**Pt-U-IIIc2 (M11L, SMD water)**

|    |           |           |           |
|----|-----------|-----------|-----------|
| Pt | 0.000000  | 3.675190  | 0.025967  |
| Pt | 0.000000  | 0.000000  | -4.613568 |
| Pt | 0.000000  | -3.675190 | 0.025967  |
| Pt | 0.000000  | 0.000000  | 4.708829  |
| C  | -2.229898 | 1.491451  | 3.579262  |
| C  | 2.919992  | -2.441641 | 2.893396  |
| H  | -2.711547 | 0.892581  | 4.352598  |
| C  | -2.919992 | 2.441641  | 2.893396  |
| C  | 2.348875  | -2.453336 | -1.316992 |
| C  | -3.066795 | 1.685270  | -2.182650 |
| H  | 2.833459  | -3.050056 | -0.546103 |
| C  | 3.066795  | -1.685270 | -2.182650 |

|   |           |           |           |
|---|-----------|-----------|-----------|
| H | -4.148387 | 1.631163  | -2.125817 |
| H | 4.148387  | -1.631163 | -2.125817 |
| H | -3.962233 | 2.651892  | 3.107037  |
| N | 1.010862  | -1.075172 | -3.209102 |
| N | 1.000863  | -2.550861 | -1.361506 |
| N | -1.010862 | 1.075172  | -3.209102 |
| N | -1.000863 | 2.550861  | -1.361506 |
| N | -0.957453 | 2.791560  | 1.598294  |
| N | -0.914551 | 1.240950  | 3.377180  |
| N | 0.957453  | -2.791560 | 1.598294  |
| N | 0.914551  | -1.240950 | 3.377180  |
| H | 3.962233  | -2.651892 | 3.107037  |
| C | -2.348875 | 2.453336  | -1.316992 |
| C | -2.234263 | 3.188070  | 1.900846  |
| O | -2.746534 | 4.176512  | 1.284262  |
| C | 2.229898  | -1.491451 | 3.579262  |
| C | 2.376652  | -0.951904 | -3.178260 |
| O | 2.953684  | -0.215568 | -4.044779 |
| C | -0.271019 | 1.885333  | 2.356955  |
| O | 0.956337  | 1.668937  | 2.128149  |
| C | -0.324685 | 1.858118  | -2.332347 |
| O | 0.938586  | 1.966154  | -2.423033 |
| C | 0.324685  | -1.858118 | -2.332347 |
| O | -0.938586 | -1.966154 | -2.423033 |
| C | 0.271019  | -1.885333 | 2.356955  |
| O | -0.956337 | -1.668937 | 2.128149  |
| N | 0.992728  | 4.774435  | 1.457525  |
| H | 1.465467  | 4.125044  | 2.085195  |
| H | 1.688144  | 5.418184  | 1.085151  |
| N | 0.980443  | 4.610360  | -1.533304 |
| H | 0.349354  | 5.217692  | -2.050967 |
| H | 1.781168  | 5.168748  | -1.244999 |
| N | -0.783597 | 1.211279  | 6.190512  |
| H | -1.648574 | 0.827584  | 6.570321  |
| N | -0.125221 | 1.306959  | 6.962372  |
| H | 0.783597  | -1.211279 | 6.190512  |
| H | 1.648574  | -0.827584 | 6.570321  |
| H | 0.125221  | -1.306959 | 6.962372  |
| N | -0.980443 | -4.610360 | -1.533304 |
| H | -0.349354 | -5.217692 | -2.050967 |
| H | -1.781168 | -5.168748 | -1.244999 |
| N | -0.992728 | -4.774435 | 1.457525  |
| H | -1.465467 | -4.125044 | 2.085195  |
| H | -1.688144 | -5.418184 | 1.085151  |
| N | -1.046441 | 1.058714  | -6.046486 |
| H | -0.977880 | 0.662440  | -6.981631 |
| H | -2.024238 | 1.028658  | -5.752343 |
| N | 1.046441  | -1.058714 | -6.046486 |
| H | 0.977880  | -0.662440 | -6.981631 |
| H | 2.024238  | -1.028658 | -5.752343 |
| H | -0.745730 | 2.029254  | -6.097297 |
| H | -0.329571 | -5.316795 | 2.007634  |
| H | 0.984161  | -2.148960 | 5.846547  |
| H | -0.984161 | 2.148960  | 5.846547  |
| H | 0.329571  | 5.316795  | 2.007634  |
| H | 1.296326  | 3.856548  | -2.148154 |
| H | 0.745730  | -2.029254 | -6.097297 |
| H | -1.296326 | -3.856548 | -2.148154 |
| C | -2.376652 | 0.951904  | -3.178260 |
| O | -2.953684 | 0.215568  | -4.044779 |

|   |           |           |           |
|---|-----------|-----------|-----------|
| H | -2.833459 | 3.050056  | -0.546103 |
| H | 2.711547  | -0.892581 | 4.352598  |
| C | 2.234263  | -3.188070 | 1.900846  |
| O | 2.746534  | -4.176512 | 1.284262  |

**Pt-U-IVc1 (M11L, SMD water)**

|    |           |           |           |
|----|-----------|-----------|-----------|
| Pt | 0.000000  | 4.013165  | 0.137635  |
| Pt | 0.000000  | 0.000000  | 4.472926  |
| Pt | 0.000000  | -4.013165 | 0.137635  |
| Pt | 0.000000  | 0.000000  | -4.386764 |
| C  | -2.317000 | 0.933605  | 2.935644  |
| C  | 3.050476  | -1.681540 | 2.070810  |
| H  | -2.776892 | 0.189815  | 3.586290  |
| C  | -3.050476 | 1.681540  | 2.070810  |
| C  | -2.541098 | 3.056074  | -3.103021 |
| C  | 2.541098  | -3.056074 | -3.103021 |
| C  | -2.025698 | 1.872193  | -3.525469 |
| C  | 2.025698  | -1.872193 | -3.525469 |
| H  | 2.555934  | -1.255765 | -4.251168 |
| H  | -2.555934 | 1.255765  | -4.251168 |
| H  | -3.477359 | 3.440771  | -3.493325 |
| H  | 3.477359  | -3.440771 | -3.493325 |
| H  | -4.127031 | 1.574374  | 1.996947  |
| N  | 0.824274  | -1.390254 | -3.111942 |
| N  | 0.737285  | -3.170824 | -1.566332 |
| N  | -0.824274 | 1.390254  | -3.111942 |
| N  | -0.737285 | 3.170824  | -1.566332 |
| N  | -1.016059 | 2.714571  | 1.360239  |
| N  | -0.979851 | 1.077344  | 3.065201  |
| N  | 1.016059  | -2.714571 | 1.360239  |
| N  | 0.979851  | -1.077344 | 3.065201  |
| C  | 2.317000  | -0.933605 | 2.935644  |
| H  | 2.776892  | -0.189815 | 3.586290  |
| H  | 4.127031  | -1.574374 | 1.996947  |
| C  | -1.794488 | 3.811949  | -2.159684 |
| O  | -2.059832 | 5.012871  | -1.846883 |
| C  | -2.389227 | 2.658951  | 1.278523  |
| O  | -3.011523 | 3.472855  | 0.534030  |
| C  | 2.389227  | -2.658951 | 1.278523  |
| O  | 3.011523  | -3.472855 | 0.534030  |
| C  | 1.794488  | -3.811949 | -2.159684 |
| O  | 2.059832  | -5.012871 | -1.846883 |
| C  | -0.320775 | 1.961109  | 2.260111  |
| O  | 0.939405  | 2.097791  | 2.373385  |
| C  | 0.320775  | -1.961109 | 2.260111  |
| O  | -0.939405 | -2.097791 | 2.373385  |
| C  | 0.198589  | -2.021483 | -2.068196 |
| O  | -0.875875 | -1.554838 | -1.582964 |
| C  | -0.198589 | 2.021483  | -2.068196 |
| O  | 0.875875  | 1.554838  | -1.582964 |
| H  | 1.070010  | 4.113914  | 2.437042  |
| H  | 1.572123  | 5.489371  | 1.658240  |
| H  | 0.074136  | 5.441819  | 2.337157  |
| H  | 0.257103  | 5.727580  | -1.737533 |
| H  | 1.427431  | 6.109437  | -0.637202 |
| H  | 1.657756  | 4.857903  | -1.682742 |
| H  | -0.304374 | 1.630037  | 6.489768  |
| H  | -1.647395 | 1.728753  | 5.548207  |
| H  | -1.463967 | 0.467390  | 6.586321  |
| H  | 1.647395  | -1.728753 | 5.548207  |

|   |           |           |           |
|---|-----------|-----------|-----------|
| H | 1.463967  | -0.467390 | 6.586321  |
| H | 0.304374  | -1.630037 | 6.489768  |
| H | -1.572123 | -5.489371 | 1.658240  |
| H | -0.074136 | -5.441819 | 2.337157  |
| H | -1.070010 | -4.113914 | 2.437042  |
| H | -1.427431 | -6.109437 | -0.637202 |
| H | -1.657756 | -4.857903 | -1.682742 |
| H | -0.257103 | -5.727580 | -1.737533 |
| H | -0.710160 | 2.242686  | -5.576056 |
| H | 0.108379  | 1.297389  | -6.637307 |
| H | -1.474376 | 0.987944  | -6.320331 |
| N | 0.770819  | 4.889583  | 1.843035  |
| N | 0.963708  | 5.338434  | -1.114062 |
| N | -0.966620 | 1.081490  | 5.943711  |
| N | 0.966620  | -1.081490 | 5.943711  |
| N | -0.770819 | -4.889583 | 1.843035  |
| N | -0.963708 | -5.338434 | -1.114062 |
| N | -0.594393 | 1.283171  | -5.898850 |
| N | 0.594393  | -1.283171 | -5.898850 |
| H | 1.474376  | -0.987944 | -6.320331 |
| H | 0.710160  | -2.242686 | -5.576056 |
| H | -0.108379 | -1.297389 | -6.637307 |

**Pt-U-IVc2 (M11L, SMD water)**

|    |           |           |           |
|----|-----------|-----------|-----------|
| Pt | 0.026024  | -3.579894 | 0.503787  |
| Pt | 4.693196  | 0.036687  | 0.007960  |
| Pt | -0.030002 | 3.579399  | -0.509215 |
| Pt | -4.688497 | -0.036825 | -0.002755 |
| C  | 2.466140  | 2.391381  | 2.764833  |
| C  | 2.603135  | -2.475547 | -2.724064 |
| C  | -2.475379 | -2.391677 | -2.770778 |
| C  | -2.603032 | 2.481144  | 2.727661  |
| H  | -2.538398 | -2.613648 | -3.830041 |
| H  | -2.703340 | 2.742001  | 3.775037  |
| H  | 2.701866  | -2.735653 | -3.771774 |
| N  | -3.341060 | 1.263992  | 0.816295  |
| N  | -1.537006 | 2.782325  | 0.620001  |
| N  | -3.292994 | -1.272439 | -0.835437 |
| N  | -1.446508 | -2.741662 | -0.649132 |
| N  | 1.536493  | -2.775174 | -0.615920 |
| N  | 3.345943  | -1.263302 | -0.811808 |
| N  | 1.444822  | 2.736766  | 0.638223  |
| N  | 3.294349  | 1.272613  | 0.834048  |
| H  | 2.523881  | 2.614546  | 3.824145  |
| C  | -1.561438 | -3.001248 | -1.968792 |
| C  | 1.692313  | -3.086430 | -1.919906 |
| C  | 1.554038  | 2.997482  | 1.958288  |
| C  | -1.694459 | 3.095133  | 1.923214  |
| C  | 2.416718  | -1.893026 | -0.041038 |
| O  | 2.366214  | -1.695206 | 1.211825  |
| C  | 2.356588  | 1.886682  | 0.062426  |
| O  | 2.330070  | 1.702452  | -1.193556 |
| C  | -2.414097 | 1.896738  | 0.045131  |
| O  | -2.361901 | 1.697964  | -1.207336 |
| C  | -2.353872 | -1.890154 | -0.068229 |
| O  | -2.321082 | -1.707105 | 1.187678  |
| H  | 2.169126  | -3.623424 | 1.848574  |
| H  | 1.176615  | -4.725207 | 2.590314  |
| H  | 1.987876  | -5.153009 | 1.222869  |
| H  | -1.996066 | -5.110012 | 1.139317  |

|   |           |           |           |
|---|-----------|-----------|-----------|
| H | -1.170749 | -4.787906 | 2.524663  |
| H | -2.122983 | -3.610207 | 1.843461  |
| H | 7.104411  | -0.809537 | -0.689913 |
| H | 6.152487  | -2.103628 | -0.345319 |
| H | 5.945506  | -1.285016 | -1.773653 |
| H | 6.033717  | 2.248968  | 0.344819  |
| H | 5.877019  | 1.436735  | 1.782215  |
| H | 7.059358  | 1.015540  | 0.703619  |
| H | 1.162991  | 4.710784  | -2.576130 |
| H | 1.957313  | 5.133750  | -1.197851 |
| H | 2.136851  | 3.602108  | -1.821231 |
| H | -1.186054 | 4.789127  | -2.556332 |
| H | -2.158403 | 3.627529  | -1.875866 |
| H | -2.023500 | 5.130625  | -1.181827 |
| H | -6.026965 | -2.249894 | -0.339872 |
| H | -7.056250 | -1.017351 | -0.691097 |
| H | -5.877967 | -1.433876 | -1.775946 |
| N | 1.507087  | -4.386419 | 1.688701  |
| N | -1.488586 | -4.387129 | 1.644667  |
| N | 6.162815  | -1.184429 | -0.781088 |
| N | 6.097392  | 1.336322  | 0.790522  |
| N | 1.478558  | 4.369922  | -1.670219 |
| N | -1.517524 | 4.399046  | -1.676243 |
| N | -6.094145 | -1.336252 | -0.783068 |
| N | -6.156756 | 1.182672  | 0.791423  |
| H | -5.938865 | 1.279880  | 1.784182  |
| H | -6.145980 | 2.103306  | 0.358710  |
| H | -7.098667 | 0.808785  | 0.699456  |
| C | -3.364659 | -1.452524 | -2.194567 |
| O | -4.237481 | -0.809404 | -2.864965 |
| C | 3.438263  | -1.476337 | -2.165710 |
| O | 4.282576  | -0.808900 | -2.848624 |
| H | 1.060189  | -3.885445 | -2.298478 |
| H | -0.889221 | -3.754093 | -2.371446 |
| H | -1.065867 | 3.897270  | 2.301224  |
| C | -3.433242 | 1.477227  | 2.170280  |
| O | -4.273476 | 0.805771  | 2.854321  |
| H | 0.877948  | 3.748764  | 2.357160  |
| C | 3.360443  | 1.454231  | 2.193247  |
| O | 4.232713  | 0.814573  | 2.867608  |

**Pt-U-Id (M11L, SMD water)**

|    |           |           |           |
|----|-----------|-----------|-----------|
| Pt | 0.829789  | 3.944587  | 0.439016  |
| Pt | -3.944587 | 0.829789  | -0.439016 |
| Pt | 3.944587  | -0.829789 | -0.439016 |
| Pt | -0.829789 | -3.944587 | 0.439016  |
| C  | 0.554632  | -1.646746 | -2.903798 |
| C  | -0.176144 | -2.453100 | -2.082422 |
| H  | 0.180995  | -1.348663 | -3.877502 |
| H  | -1.156241 | -2.825100 | -2.370784 |
| N  | 0.267128  | -2.849430 | -0.871278 |
| N  | 2.227550  | -1.580750 | -1.216229 |
| C  | -0.554632 | 1.646746  | -2.903798 |
| C  | 0.176144  | 2.453100  | -2.082422 |
| H  | -0.180995 | 1.348663  | -3.877502 |
| H  | 1.156241  | 2.825100  | -2.370784 |
| N  | -0.267128 | 2.849430  | -0.871278 |
| N  | -2.227550 | 1.580750  | -1.216229 |
| C  | 1.646746  | 0.554632  | 2.903798  |
| C  | -1.646746 | -0.554632 | 2.903798  |

|   |           |           |           |
|---|-----------|-----------|-----------|
| N | -2.849430 | -0.267128 | 0.871278  |
| N | -1.580750 | -2.227550 | 1.216229  |
| C | -2.453100 | 0.176144  | 2.082422  |
| H | -1.348663 | -0.180995 | 3.877502  |
| H | -2.825100 | 1.156241  | 2.370784  |
| H | 1.348663  | 0.180995  | 3.877502  |
| C | 2.453100  | -0.176144 | 2.082422  |
| N | 2.849430  | 0.267128  | 0.871278  |
| N | 1.580750  | 2.227550  | 1.216229  |
| H | 2.825100  | -1.156241 | 2.370784  |
| C | -1.814436 | 1.168004  | -2.455872 |
| O | -2.570218 | 0.404216  | -3.139247 |
| C | -1.168004 | -1.814436 | 2.455872  |
| O | -0.404216 | -2.570218 | 3.139247  |
| C | 1.814436  | -1.168004 | -2.455872 |
| O | 2.570218  | -0.404216 | -3.139247 |
| C | 1.168004  | 1.814436  | 2.455872  |
| O | 0.404216  | 2.570218  | 3.139247  |
| C | -1.496711 | 2.431956  | -0.444925 |
| O | -1.955960 | 2.849430  | 0.661226  |
| C | -2.431956 | -1.496711 | 0.444925  |
| O | -2.849430 | -1.955960 | -0.661226 |
| C | 1.496711  | -2.431956 | -0.444925 |
| O | 1.955960  | -2.849430 | 0.661226  |
| C | 2.431956  | 1.496711  | 0.444925  |
| O | 2.849430  | 1.955960  | -0.661226 |
| N | 5.670562  | -0.032844 | 0.379804  |
| H | 5.959014  | -0.566351 | 1.197759  |
| H | 6.452204  | -0.018112 | -0.272131 |
| N | 4.993548  | -1.910855 | -1.850156 |
| H | 4.515633  | -1.788083 | -2.742738 |
| H | 5.957784  | -1.605776 | -1.967110 |
| N | 1.910855  | 4.993548  | 1.850156  |
| H | 1.605776  | 5.957784  | 1.967110  |
| H | 1.788083  | 4.515633  | 2.742738  |
| N | 0.032844  | 5.670562  | -0.379804 |
| H | 0.018112  | 6.452204  | 0.272131  |
| H | 0.566351  | 5.959014  | -1.197759 |
| N | -4.993548 | 1.910855  | -1.850156 |
| H | -4.515633 | 1.788083  | -2.742738 |
| H | -5.957784 | 1.605776  | -1.967110 |
| N | -5.670562 | 0.032844  | 0.379804  |
| H | -5.959014 | 0.566351  | 1.197759  |
| H | -6.452204 | 0.018112  | -0.272131 |
| N | -0.032844 | -5.670562 | -0.379804 |
| H | 0.925793  | -5.500639 | -0.678727 |
| H | -0.018112 | -6.452204 | 0.272131  |
| N | -1.910855 | -4.993548 | 1.850156  |
| H | -2.904107 | -5.005887 | 1.628899  |
| H | -1.605776 | -5.957784 | 1.967110  |
| H | -5.005887 | 2.904107  | -1.628899 |
| H | -5.500639 | -0.925793 | 0.678727  |
| H | -0.566351 | -5.959014 | -1.197759 |
| H | -1.788083 | -4.515633 | 2.742738  |
| H | 5.005887  | -2.904107 | -1.628899 |
| H | 5.500639  | 0.925793  | 0.678727  |
| H | 2.904107  | 5.005887  | 1.628899  |
| H | -0.925793 | 5.500639  | -0.678727 |

**Pt-U-IId (M11L, SMD water)**

|    |           |           |           |
|----|-----------|-----------|-----------|
| Pt | 0.015539  | 4.116313  | -0.112918 |
| Pt | 4.236297  | 0.042113  | -0.057760 |
| Pt | 0.046303  | -4.039720 | 0.055392  |
| Pt | -4.147086 | 0.019153  | 0.107839  |
| C  | -1.517165 | -1.504948 | 3.119861  |
| C  | -0.768096 | -2.385679 | 2.397939  |
| H  | -1.349792 | -1.355622 | 4.180660  |
| H  | 0.027340  | -2.971378 | 2.858403  |
| N  | -0.966074 | -2.603292 | 1.081084  |
| N  | -2.696321 | -0.996300 | 1.115294  |
| C  | 1.776337  | 1.763365  | 2.966748  |
| C  | 0.992135  | 2.604151  | 2.235964  |
| H  | 1.648896  | 1.656960  | 4.038137  |
| H  | 0.207142  | 3.201261  | 2.699421  |
| N  | 1.138531  | 2.766354  | 0.904114  |
| N  | 2.876216  | 1.175952  | 0.938884  |
| C  | -1.714295 | 1.566402  | -3.051696 |
| C  | 1.670446  | -1.593733 | -3.044765 |
| N  | 2.786238  | -1.001070 | -1.025252 |
| N  | 1.132352  | -2.682148 | -0.998916 |
| C  | 2.573148  | -0.846534 | -2.349632 |
| H  | 1.525230  | -1.460653 | -4.110903 |
| H  | 3.183238  | -0.087184 | -2.837977 |
| H  | -1.596622 | 1.404113  | -4.117184 |
| N  | -2.798580 | 1.078582  | -0.988460 |
| N  | -1.064504 | 2.676086  | -1.050006 |
| C  | -0.925302 | 2.444963  | -2.372533 |
| H  | -0.144907 | 3.019309  | -2.871698 |
| C  | 2.782961  | 1.019707  | 2.298053  |
| O  | 3.598858  | 0.239163  | 2.888009  |
| C  | 0.923532  | -2.580898 | -2.349417 |
| O  | 0.102009  | -3.375907 | -2.911187 |
| C  | -2.551865 | -0.788918 | 2.462278  |
| O  | -3.349696 | 0.007719  | 3.056846  |
| C  | -2.720270 | 0.860094  | -2.339222 |
| O  | -3.547288 | 0.062464  | -2.888522 |
| C  | -2.014520 | 1.988790  | -0.347314 |
| O  | -2.172969 | 2.220680  | 0.889364  |
| C  | 2.096269  | 2.049047  | 0.244102  |
| O  | 2.265940  | 2.218150  | -1.001782 |
| C  | 2.054995  | -1.929763 | -0.337826 |
| O  | 2.255726  | -2.105086 | 0.901578  |
| C  | -1.937474 | -1.895310 | 0.428011  |
| O  | -2.139907 | -2.098463 | -0.806182 |
| N  | -1.130904 | 5.494506  | -1.138569 |
| H  | -1.071132 | 6.437440  | -0.758064 |
| H  | -0.842894 | 5.538293  | -2.115203 |
| N  | 1.098701  | 5.595711  | 0.837431  |
| H  | 0.980045  | 6.515925  | 0.416814  |
| H  | 0.818708  | 5.666133  | 1.814650  |
| N  | -5.505899 | -1.022221 | 1.263068  |
| H  | -6.460585 | -0.675350 | 1.195096  |
| H  | -5.515373 | -2.011399 | 1.023545  |
| N  | -5.623991 | 0.993887  | -0.957161 |
| H  | -6.549500 | 0.586944  | -0.838204 |
| H  | -5.682094 | 1.979330  | -0.711131 |
| N  | -1.053219 | -5.423770 | 1.131504  |
| H  | -0.826338 | -6.391996 | 0.910113  |
| H  | -0.900663 | -5.295921 | 2.130777  |
| N  | 1.027696  | -5.493665 | -1.030446 |

|   |           |           |           |
|---|-----------|-----------|-----------|
| H | 0.616401  | -6.421610 | -0.951246 |
| H | 0.971223  | -5.201709 | -2.007350 |
| N | 5.631564  | -1.107968 | -1.060232 |
| H | 6.122126  | -0.565746 | -1.768915 |
| H | 6.330285  | -1.493398 | -0.427213 |
| N | 5.706502  | 1.067049  | 0.963969  |
| H | 5.432981  | 1.041895  | 1.947537  |
| H | 6.634115  | 0.656604  | 0.877286  |
| H | 2.092921  | 5.375196  | 0.817038  |
| H | -2.110931 | 5.216519  | -1.118620 |
| H | -5.195327 | -0.924797 | 2.230527  |
| H | -5.362340 | 0.917093  | -1.940839 |
| H | -2.047059 | -5.292471 | 0.951813  |
| H | 2.007879  | -5.563267 | -0.766808 |
| H | 5.175074  | -1.889657 | -1.528465 |
| H | 5.765226  | 2.038152  | 0.666464  |

**Pt-U-III d (M11L, SMD water)**

|    |           |           |           |
|----|-----------|-----------|-----------|
| Pt | 2.756568  | 3.170015  | 0.066130  |
| Pt | 0.000000  | 0.000000  | -3.918694 |
| Pt | -2.756568 | -3.170015 | 0.066130  |
| Pt | 0.000000  | 0.000000  | 4.059246  |
| C  | 1.298132  | -3.079252 | 1.389076  |
| H  | 2.230763  | -3.574103 | 1.141552  |
| N  | -1.047576 | -2.807300 | 1.098298  |
| N  | 0.100948  | -1.444931 | 2.639150  |
| C  | 3.152094  | -0.914069 | -1.162221 |
| C  | 3.291574  | 0.286788  | -0.531899 |
| H  | 3.759160  | -1.770790 | -0.888658 |
| H  | 4.010634  | 0.428100  | 0.274280  |
| N  | 2.565130  | 1.374177  | -0.865095 |
| N  | 1.456157  | 0.081315  | -2.501766 |
| C  | -1.298132 | 3.079252  | 1.389076  |
| C  | -3.152094 | 0.914069  | -1.162221 |
| N  | -1.456157 | -0.081315 | -2.501766 |
| N  | -2.565130 | -1.374177 | -0.865095 |
| H  | -3.759160 | 1.770790  | -0.888658 |
| H  | -2.230763 | 3.574103  | 1.141552  |
| C  | -1.252723 | 2.057278  | 2.290967  |
| N  | -0.100948 | 1.444931  | 2.639150  |
| N  | 1.047576  | 2.807300  | 1.098298  |
| H  | -2.150755 | 1.696486  | 2.791437  |
| C  | 1.252723  | -2.057278 | 2.290967  |
| C  | -3.291574 | -0.286788 | -0.531899 |
| H  | 2.150755  | -1.696486 | 2.791437  |
| H  | -4.010634 | -0.428100 | 0.274280  |
| C  | 2.217428  | -1.025900 | -2.228566 |
| O  | 2.070439  | -2.074208 | -2.933884 |
| C  | -2.217428 | 1.025900  | -2.228566 |
| O  | -2.070439 | 2.074208  | -2.933884 |
| C  | 0.086878  | -3.510925 | 0.783105  |
| O  | 0.000000  | -4.498692 | -0.013384 |
| C  | -0.086878 | 3.510925  | 0.783105  |
| O  | 0.000000  | 4.498692  | -0.013384 |
| C  | 1.626843  | 1.266784  | -1.854369 |
| O  | 0.934569  | 2.277561  | -2.180295 |
| C  | 1.062880  | 1.817447  | 2.029731  |
| O  | 2.151086  | 1.249445  | 2.350263  |
| C  | -1.062880 | -1.817447 | 2.029731  |
| O  | -2.151086 | -1.249445 | 2.350263  |

|   |           |           |           |
|---|-----------|-----------|-----------|
| C | -1.626843 | -1.266784 | -1.854369 |
| O | -0.934569 | -2.277561 | -2.180295 |
| N | 4.506683  | 3.521025  | -0.979843 |
| H | 5.232125  | 3.910339  | -0.380548 |
| H | 4.870081  | 2.658236  | -1.382512 |
| N | 2.866080  | 5.017915  | 0.978926  |
| H | 3.533165  | 5.652089  | 0.544023  |
| H | 1.935893  | 5.430832  | 0.903019  |
| N | 1.509849  | 0.031795  | -5.331693 |
| H | 1.186715  | -0.102326 | -6.287817 |
| H | 2.015863  | 0.914358  | -5.296655 |
| N | -1.509849 | -0.031795 | -5.331693 |
| H | -1.186715 | 0.102326  | -6.287817 |
| H | -2.015863 | -0.914358 | -5.296655 |
| N | 0.106378  | -1.499558 | 5.477167  |
| H | 0.978255  | -2.015436 | 5.368586  |
| H | 0.065734  | -1.168052 | 6.439320  |
| N | -0.106378 | 1.499558  | 5.477167  |
| H | -0.978255 | 2.015436  | 5.368586  |
| H | -0.065734 | 1.168052  | 6.439320  |
| N | -2.866080 | -5.017915 | 0.978926  |
| H | -3.533165 | -5.652089 | 0.544023  |
| H | -1.935893 | -5.430832 | 0.903019  |
| N | -4.506683 | -3.521025 | -0.979843 |
| H | -5.232125 | -3.910339 | -0.380548 |
| H | -4.870081 | -2.658236 | -1.382512 |
| H | 0.659176  | 2.158184  | 5.345603  |
| H | -0.659176 | -2.158184 | 5.345603  |
| H | 4.351514  | 4.176850  | -1.743276 |
| H | 3.105453  | 4.943135  | 1.964942  |
| H | -2.168050 | 0.715539  | -5.115530 |
| H | 2.168050  | -0.715539 | -5.115530 |
| H | -4.351514 | -4.176850 | -1.743276 |
| H | -3.105453 | -4.943135 | 1.964942  |

**Pt-U-IVd (M11L, SMD water)**

|    |           |           |           |
|----|-----------|-----------|-----------|
| Pt | 0.000000  | 3.968603  | 0.000000  |
| Pt | -4.288977 | 0.000000  | 0.000000  |
| Pt | 4.288977  | 0.000000  | 0.000000  |
| Pt | 0.000000  | -3.968603 | 0.000000  |
| C  | -1.717323 | -1.537462 | 3.047562  |
| C  | -0.921246 | -2.375969 | 2.326420  |
| H  | -1.575839 | -1.398528 | 4.113524  |
| H  | -0.112449 | -2.939472 | 2.791458  |
| N  | -1.087289 | -2.577720 | 1.002612  |
| N  | -2.874175 | -1.039023 | 1.027050  |
| C  | 1.717323  | 1.537462  | 3.047562  |
| C  | 0.921246  | 2.375969  | 2.326420  |
| H  | 1.575839  | 1.398528  | 4.113524  |
| H  | 0.112449  | 2.939472  | 2.791458  |
| N  | 1.087289  | 2.577720  | 1.002612  |
| N  | 2.874175  | 1.039023  | 1.027050  |
| C  | -1.717323 | 1.537462  | -3.047562 |
| C  | 1.717323  | -1.537462 | -3.047562 |
| N  | 2.874175  | -1.039023 | -1.027050 |
| N  | 1.087289  | -2.577720 | -1.002612 |
| H  | 1.575839  | -1.398528 | -4.113524 |
| H  | -1.575839 | 1.398528  | -4.113524 |
| N  | -2.874175 | 1.039023  | -1.027050 |
| N  | -1.087289 | 2.577720  | -1.002612 |

|   |           |           |           |
|---|-----------|-----------|-----------|
| C | -0.921246 | 2.375969  | -2.326420 |
| C | 0.921246  | -2.375969 | -2.326420 |
| H | -0.112449 | 2.939472  | -2.791458 |
| H | 0.112449  | -2.939472 | -2.791458 |
| C | 2.762555  | -0.846122 | -2.379410 |
| O | 3.594787  | -0.082609 | -2.968953 |
| C | 2.762555  | 0.846122  | 2.379410  |
| O | 3.594787  | 0.082609  | 2.968953  |
| C | -2.762555 | 0.846122  | -2.379410 |
| O | -3.594787 | 0.082609  | -2.968953 |
| C | -2.762555 | -0.846122 | 2.379410  |
| O | -3.594787 | -0.082609 | 2.968953  |
| C | 2.073997  | 1.900984  | 0.341061  |
| O | 2.248871  | 2.102029  | -0.898603 |
| C | -2.073997 | 1.900984  | -0.341061 |
| O | -2.248871 | 2.102029  | 0.898603  |
| C | -2.073997 | -1.900984 | 0.341061  |
| O | -2.248871 | -2.102029 | -0.898603 |
| C | 2.073997  | -1.900984 | -0.341061 |
| O | 2.248871  | -2.102029 | 0.898603  |
| H | -1.009439 | 6.331199  | -0.612756 |
| H | -0.800390 | 5.448816  | -1.983839 |
| H | -2.085331 | 5.150915  | -1.001527 |
| H | 1.009439  | 6.331199  | 0.612756  |
| H | 0.800390  | 5.448816  | 1.983839  |
| H | 2.085331  | 5.150915  | 1.001527  |
| H | -5.416426 | 0.962505  | -2.069624 |
| H | -6.648785 | 0.625510  | -1.018955 |
| H | -5.766461 | 2.000166  | -0.826559 |
| H | -5.416426 | -0.962505 | 2.069624  |
| H | -6.648785 | -0.625510 | 1.018955  |
| H | -5.766461 | -2.000166 | 0.826559  |
| H | -2.085331 | -5.150915 | 1.001527  |
| H | -1.009439 | -6.331199 | 0.612756  |
| H | -0.800390 | -5.448816 | 1.983839  |
| H | 2.085331  | -5.150915 | -1.001527 |
| H | 1.009439  | -6.331199 | -0.612756 |
| H | 0.800390  | -5.448816 | -1.983839 |
| H | 5.416426  | -0.962505 | -2.069624 |
| H | 6.648785  | -0.625510 | -1.018955 |
| H | 5.766461  | -2.000166 | -0.826559 |
| H | 5.416426  | 0.962505  | 2.069624  |
| H | 6.648785  | 0.625510  | 1.018955  |
| H | 5.766461  | 2.000166  | 0.826559  |
| N | 1.096796  | 5.397444  | 1.010191  |
| N | -1.096796 | 5.397444  | -1.010191 |
| N | -5.713476 | 1.020082  | -1.094574 |
| N | -5.713476 | -1.020082 | 1.094574  |
| N | 1.096796  | -5.397444 | -1.010191 |
| N | -1.096796 | -5.397444 | 1.010191  |
| N | 5.713476  | -1.020082 | -1.094574 |
| N | 5.713476  | 1.020082  | 1.094574  |

| <b>Pd-C-Ia (M11L, SMD water)</b> |           |           |           |
|----------------------------------|-----------|-----------|-----------|
| Pd                               | 0.000206  | 3.646915  | 0.000257  |
| Pd                               | -4.442351 | 0.000173  | -0.000014 |
| Pd                               | -0.000154 | -3.646937 | -0.000317 |
| Pd                               | 4.442269  | -0.000145 | 0.000126  |
| C                                | -1.544200 | 0.964889  | 2.947867  |
| C                                | -2.664006 | 0.520896  | 2.302671  |
| H                                | -1.290891 | 0.627873  | 3.946835  |
| H                                | -3.343196 | -0.187787 | 2.773966  |
| N                                | -2.990584 | 0.912900  | 1.057195  |
| N                                | -1.049152 | 2.249991  | 1.004858  |
| C                                | 1.544088  | -0.965427 | 2.947850  |
| C                                | 2.663872  | -0.521229 | 2.302747  |
| H                                | 1.290752  | -0.628623 | 3.946883  |
| H                                | 3.342998  | 0.187428  | 2.774174  |
| N                                | 2.990503  | -0.912993 | 1.057218  |
| N                                | 1.049166  | -2.250204 | 1.004595  |
| C                                | 2.205931  | -1.828542 | 0.418763  |
| O                                | 2.551456  | -2.298300 | -0.705122 |
| C                                | 1.544404  | 0.965309  | -2.947902 |
| C                                | -2.205879 | 1.828424  | 0.418881  |
| O                                | -2.551362 | 2.298452  | -0.704905 |
| C                                | -1.544224 | -0.964670 | -2.947909 |
| C                                | -2.206118 | -1.828342 | -0.419021 |
| O                                | -2.551652 | -2.298332 | 0.704763  |
| H                                | 1.710439  | -4.692692 | 1.623602  |
| H                                | 0.405603  | -5.698028 | 1.505269  |
| H                                | 1.542866  | -5.675397 | 0.308102  |
| H                                | -0.406141 | -5.697740 | -1.506203 |
| H                                | -1.543567 | -5.675029 | -0.309189 |
| H                                | -1.710763 | -4.692130 | -1.624592 |
| H                                | -5.493244 | -1.383764 | -1.900969 |
| H                                | -6.307098 | -1.692096 | -0.499999 |
| H                                | -6.626034 | -0.316250 | -1.352881 |
| H                                | -6.625877 | 0.316821  | 1.353031  |
| H                                | -5.492888 | 1.384165  | 1.901090  |
| H                                | -6.306830 | 1.692687  | 0.500205  |
| N                                | 1.036498  | -5.098403 | 0.976796  |
| N                                | -1.036989 | -5.098052 | -0.977742 |
| N                                | -5.888583 | -0.956412 | -1.065662 |
| N                                | -5.888378 | 0.956917  | 1.065800  |
| N                                | -1.049359 | -2.249905 | -1.004939 |
| N                                | -2.990742 | -0.912737 | -1.057334 |
| C                                | -2.664053 | -0.520667 | -2.302761 |
| H                                | -3.343198 | 0.188051  | -2.774072 |
| H                                | -1.290846 | -0.627629 | -3.946851 |
| H                                | 1.291129  | 0.628537  | -3.946962 |
| C                                | 2.664109  | 0.521036  | -2.302717 |
| N                                | 1.049392  | 2.250077  | -1.004667 |
| N                                | 2.990663  | 0.912756  | -1.057153 |
| C                                | 2.206080  | 1.828333  | -0.418752 |
| O                                | 2.551534  | 2.298048  | 0.705176  |
| H                                | 3.343239  | -0.187642 | -2.774107 |
| H                                | -1.542889 | 5.675243  | 0.309010  |
| H                                | -1.710423 | 4.692309  | 1.624351  |
| H                                | -0.405638 | 5.697737  | 1.506198  |
| H                                | 0.406191  | 5.698054  | -1.505273 |
| H                                | 1.543473  | 5.675119  | -0.308125 |
| H                                | 1.710848  | 4.692500  | -1.623717 |
| H                                | 5.493040  | 1.385026  | -1.899969 |

|   |           |           |           |
|---|-----------|-----------|-----------|
| H | 6.308493  | 1.690855  | -0.499371 |
| H | 6.625005  | 0.315537  | -1.354052 |
| H | 6.308382  | -1.691304 | 0.500037  |
| H | 6.624752  | -0.315883 | 1.354607  |
| H | 5.492657  | -1.385285 | 1.900426  |
| N | 5.888609  | 0.956308  | -1.065485 |
| N | 5.888397  | -0.956673 | 1.065963  |
| N | 1.036990  | 5.098272  | -0.976862 |
| N | -1.036502 | 5.098167  | 0.977619  |
| C | 0.684421  | -1.818690 | 2.232333  |
| C | -0.684590 | -1.818134 | -2.232582 |
| C | 0.684716  | 1.818606  | -2.232449 |
| C | -0.684472 | 1.818255  | 2.232541  |
| N | 0.478413  | 2.241932  | 2.717595  |
| N | -0.478101 | 2.242492  | -2.717466 |
| N | -0.478452 | -2.242546 | 2.717252  |
| N | 0.478274  | -2.241885 | -2.717590 |
| H | -1.187317 | -2.594415 | 2.078084  |
| H | -0.792590 | -1.884933 | 3.605360  |
| H | 0.792442  | -1.884061 | -3.605600 |
| H | 1.187091  | -2.594018 | -2.078522 |
| H | 0.792480  | 1.884098  | 3.605641  |
| H | 1.187360  | 2.593801  | 2.078515  |
| H | -1.186992 | 2.594433  | -2.078371 |
| H | -0.792178 | 1.884912  | -3.605608 |

| <b>Pd-C-IIa (M11L, SMD water)</b> |           |           |           |
|-----------------------------------|-----------|-----------|-----------|
| Pd                                | 3.833994  | 1.948921  | -0.198096 |
| Pd                                | 1.751739  | -3.394224 | -0.786121 |
| Pd                                | -3.753140 | -1.792347 | -0.323358 |
| Pd                                | -1.703049 | 3.560569  | -0.693885 |
| C                                 | -0.310089 | 2.993430  | 1.834071  |
| C                                 | -4.769131 | 1.863049  | 1.697159  |
| C                                 | 0.717163  | 2.697656  | 2.681790  |
| H                                 | -1.295669 | 3.253858  | 2.216939  |
| C                                 | 4.759978  | -0.420200 | 1.302697  |
| C                                 | -0.666999 | -2.604565 | 2.609519  |
| H                                 | 5.453624  | 0.320461  | 1.701255  |
| C                                 | 4.830931  | -1.727225 | 1.689431  |
| C                                 | 0.356208  | -2.904501 | 1.760658  |
| H                                 | 1.333796  | -3.193838 | 2.142430  |
| H                                 | -0.541732 | -2.632830 | 3.685796  |
| H                                 | 5.568543  | -2.073324 | 2.404230  |
| H                                 | 0.589934  | 2.708649  | 3.758090  |
| H                                 | -5.499100 | 2.213057  | 2.418003  |
| N                                 | 3.006376  | -2.163889 | 0.217467  |
| N                                 | 3.847670  | 0.031982  | 0.423271  |
| N                                 | 0.217957  | -2.879915 | 0.421362  |
| N                                 | -2.045550 | -2.230963 | 0.697630  |
| N                                 | -3.830573 | 0.098534  | 0.392906  |
| N                                 | -2.942099 | 2.280181  | 0.236637  |
| N                                 | -0.168570 | 3.003776  | 0.495188  |
| N                                 | 2.097585  | 2.375703  | 0.764012  |
| C                                 | 3.906822  | -2.616642 | 1.113998  |
| C                                 | -1.912989 | -2.278848 | 2.040280  |
| C                                 | -3.842401 | 2.698795  | 1.142151  |
| C                                 | 1.968928  | 2.410291  | 2.106863  |
| C                                 | 2.962598  | -0.844396 | -0.138767 |
| O                                 | 2.119327  | -0.450316 | -0.989513 |
| C                                 | 1.036607  | 2.664995  | -0.048323 |



|   |           |           |           |
|---|-----------|-----------|-----------|
| O | 1.191260  | 2.638409  | -1.304465 |
| C | -0.980104 | -2.509706 | -0.115533 |
| O | -1.124699 | -2.440697 | -1.371131 |
| C | -2.924161 | 0.971950  | -0.148526 |
| O | -2.090987 | 0.568638  | -1.003957 |
| N | 3.837996  | 3.880433  | -0.834980 |
| H | 4.605052  | 4.110299  | -1.462829 |
| H | 2.957605  | 4.021569  | -1.329963 |
| N | 5.575739  | 1.535869  | -1.169562 |
| H | 6.008604  | 2.351156  | -1.598536 |
| H | 6.247181  | 1.132247  | -0.518490 |
| N | 0.527538  | -4.668238 | -1.801164 |
| H | 0.932298  | -5.027022 | -2.663070 |
| H | 0.276321  | -5.460554 | -1.214025 |
| N | 3.331948  | -3.890505 | -1.970915 |
| H | 3.140559  | -4.675357 | -2.590077 |
| H | 3.571035  | -3.082371 | -2.543576 |
| N | -5.411385 | -1.395621 | -1.434135 |
| H | -5.684039 | -0.417717 | -1.355868 |
| H | -5.215719 | -1.588381 | -2.415523 |
| N | -3.712834 | -3.685958 | -1.071455 |
| H | -3.809697 | -4.372987 | -0.327407 |
| H | -4.441617 | -3.857779 | -1.761162 |
| N | -0.485077 | 4.896588  | -1.633274 |
| H | -0.882978 | 5.279275  | -2.488068 |
| H | -0.255061 | 5.670708  | -1.014498 |
| N | -3.287691 | 4.102774  | -1.851974 |
| H | -3.098312 | 4.905493  | -2.448386 |
| H | -3.541506 | 3.315616  | -2.446518 |
| H | -6.199139 | -1.974097 | -1.146953 |
| H | -4.089508 | 4.326881  | -1.264900 |
| H | 0.365098  | 4.379378  | -1.860611 |
| H | -2.802909 | -3.800608 | -1.518480 |
| H | 4.145386  | -4.128220 | -1.405744 |
| H | 3.874740  | 4.517047  | -0.042066 |
| H | 5.393788  | 0.851670  | -1.901796 |
| H | -0.311344 | -4.128191 | -2.019698 |
| C | -4.758901 | 0.522227  | 1.275246  |
| H | -3.802007 | 3.754804  | 1.407577  |
| N | -2.968194 | -2.027218 | 2.803147  |
| N | -5.644305 | -0.360366 | 1.735833  |
| N | 3.892679  | -3.909659 | 1.420150  |
| N | 3.042790  | 2.181178  | 2.852873  |
| H | -3.871189 | -1.818967 | 2.411421  |
| H | -2.883063 | -2.052994 | 3.805112  |
| H | -5.700617 | -1.297875 | 1.365850  |
| H | -6.360288 | -0.063685 | 2.377858  |
| H | 3.201884  | -4.530922 | 1.025787  |
| H | 4.554665  | -4.283568 | 2.079107  |
| H | 2.977134  | 2.198621  | 3.856254  |
| H | 3.949261  | 2.047319  | 2.434761  |

**Pd-C-IIIa (M1 1L, SMD water)**

|    |           |           |           |
|----|-----------|-----------|-----------|
| Pd | -2.744546 | -2.861342 | -0.507847 |
| Pd | 2.995425  | -2.729190 | -0.584453 |
| Pd | 2.952865  | 2.963613  | -0.328529 |
| Pd | -2.803027 | 2.963107  | -0.544410 |
| C  | 0.229369  | -2.590406 | 2.631795  |
| C  | -1.014261 | -2.687669 | 1.979100  |
| C  | 1.350899  | -2.599249 | 1.856893  |

|   |           |           |           |
|---|-----------|-----------|-----------|
| H | 0.284027  | -2.536840 | 3.713044  |
| H | 2.342019  | -2.561248 | 2.305685  |
| C | -5.257800 | 0.077552  | 1.341304  |
| C | -4.655104 | 1.222377  | 0.908567  |
| H | -6.158804 | 0.094038  | 1.944012  |
| C | 4.581640  | -1.135995 | 1.399065  |
| C | 5.017328  | 0.061516  | 1.996263  |
| C | 4.517525  | 1.228663  | 1.492739  |
| H | 5.723293  | 0.046955  | 2.818417  |
| H | 4.814062  | 2.194320  | 1.899928  |
| N | 3.639679  | 1.259160  | 0.474816  |
| N | 1.303669  | -2.671418 | 0.513020  |
| N | -1.061701 | -2.732437 | 0.630717  |
| N | -3.542099 | -1.139821 | 0.210516  |
| N | -3.534817 | 1.222062  | 0.164507  |
| C | 0.005601  | 2.734842  | 2.716039  |
| H | -0.009540 | 2.688511  | 3.798852  |
| N | -1.153469 | 2.896538  | 0.635646  |
| N | 1.207586  | 2.784282  | 0.665184  |
| H | -4.579486 | 2.120279  | -2.178905 |
| H | -5.274086 | 3.242034  | -1.186221 |
| H | -4.379330 | 3.728536  | -2.482664 |
| H | -1.153144 | 4.597016  | -1.517818 |
| H | -2.640377 | 5.085694  | -2.060345 |
| H | -2.171817 | 5.457382  | -0.524375 |
| H | 2.845842  | 5.047553  | -1.904602 |
| H | 1.336625  | 4.455477  | -1.553945 |
| H | 2.142819  | 5.411606  | -0.458542 |
| H | 5.501980  | 3.046197  | -0.614792 |
| H | 4.830026  | 2.383068  | -1.966206 |
| H | 4.860655  | 4.021738  | -1.777978 |
| H | -4.930674 | -3.829112 | -1.504034 |
| H | -4.939479 | -2.188427 | -1.707927 |
| H | -4.030961 | -3.135694 | -2.701719 |
| H | -1.109972 | -4.436143 | -1.614524 |
| H | -1.944192 | -5.306408 | -0.472074 |
| H | -2.622043 | -5.032084 | -1.950272 |
| H | 2.269745  | -5.174847 | -0.933172 |
| H | 1.335417  | -4.138699 | -1.840649 |
| H | 2.827049  | -4.628615 | -2.385445 |
| H | 4.876910  | -1.814764 | -2.043628 |
| H | 5.520331  | -2.967740 | -1.054082 |
| H | 4.723704  | -3.410671 | -2.425491 |
| N | 4.729354  | -2.744988 | -1.656047 |
| N | 2.288647  | -4.374291 | -1.560489 |
| N | -2.033028 | -4.628117 | -1.225191 |
| N | -4.355836 | -3.022390 | -1.742564 |
| N | -4.447429 | 3.031669  | -1.743599 |
| N | -2.126422 | 4.746354  | -1.250439 |
| N | 2.251155  | 4.685576  | -1.163071 |
| N | 4.743166  | 3.137334  | -1.287621 |
| N | 3.694560  | -1.097416 | 0.383551  |
| C | 0.036980  | 2.836553  | -0.031295 |
| O | 0.047560  | 2.857008  | -1.297939 |
| C | -2.965995 | 0.034837  | -0.202953 |
| O | -1.935483 | 0.010520  | -0.926440 |
| C | 0.089941  | -2.683725 | -0.107846 |
| C | 0.018225  | -2.673156 | -1.372047 |
| O | 3.217979  | 0.091809  | -0.090311 |
| O | 2.401479  | 0.103527  | -1.052530 |

|   |           |           |          |
|---|-----------|-----------|----------|
| H | 5.684291  | -2.393202 | 2.555116 |
| H | 4.680746  | -3.172140 | 1.376642 |
| H | -3.038478 | -2.846819 | 2.205942 |
| H | -2.133155 | -2.724392 | 3.669912 |
| N | -2.148051 | -2.747390 | 2.664709 |
| N | 5.014196  | -2.323377 | 1.808391 |
| C | 1.171987  | 2.697826  | 2.007914 |
| C | -4.666751 | -1.137521 | 0.956031 |
| C | -1.188469 | 2.885576  | 1.985069 |
| H | 2.135189  | 2.617036  | 2.510717 |
| N | -5.188697 | -2.307866 | 1.320817 |
| N | -2.362609 | 3.033134  | 2.584986 |
| H | -4.825196 | -3.184428 | 0.975934 |
| H | -6.039945 | -2.331232 | 1.857894 |
| H | -3.196291 | 3.228974  | 2.054420 |
| H | -2.424640 | 3.030925  | 3.588636 |
| H | -5.070568 | 2.200218  | 1.151773 |

**Pd-C-IVa (M11L, SMD water)**

|    |           |           |           |
|----|-----------|-----------|-----------|
| Pd | -2.849910 | 3.205460  | -0.255767 |
| Pd | 2.880465  | 2.531224  | -0.755487 |
| Pd | 2.849910  | -3.205460 | -0.255767 |
| Pd | -2.880465 | -2.531224 | -0.755487 |
| C  | -4.558388 | -0.988847 | 1.105990  |
| C  | -0.321541 | -2.569746 | 2.615579  |
| C  | -5.127888 | 0.108060  | 1.684311  |
| H  | -4.894292 | -1.995857 | 1.351014  |
| C  | 5.127888  | -0.108060 | 1.684311  |
| C  | 0.321541  | 2.569746  | 2.615579  |
| C  | 4.558388  | 0.988847  | 1.105990  |
| H  | 4.894292  | 1.995857  | 1.351014  |
| H  | 5.934891  | -0.023369 | 2.402868  |
| H  | 0.450471  | 2.488358  | 3.688799  |
| H  | -5.934891 | 0.023369  | 2.402868  |
| H  | -0.450471 | -2.488358 | 3.688799  |
| N  | 1.238539  | 2.582222  | 0.421516  |
| N  | -1.090316 | 2.908225  | 0.723003  |
| N  | 3.570012  | 0.898271  | 0.199061  |
| N  | 3.629354  | -1.455163 | 0.403071  |
| N  | 1.090316  | -2.908225 | 0.723003  |
| N  | -1.238539 | -2.582222 | 0.421516  |
| N  | -3.570012 | -0.898271 | 0.199061  |
| N  | -3.629354 | 1.455163  | 0.403071  |
| C  | 1.374104  | 2.466315  | 1.756180  |
| C  | 4.644301  | -1.368327 | 1.288353  |
| C  | -1.374104 | -2.466315 | 1.756180  |
| C  | -4.644301 | 1.368327  | 1.288353  |
| C  | -0.006746 | 2.777461  | -0.102905 |
| O  | -0.170064 | 2.856901  | -1.356085 |
| C  | -3.094033 | 0.327909  | -0.163883 |
| O  | -2.180755 | 0.428360  | -1.026454 |
| C  | 3.094033  | -0.327909 | -0.163883 |
| O  | 2.180755  | -0.428360 | -1.026454 |
| C  | 0.006746  | -2.777461 | -0.102905 |
| O  | 0.170064  | -2.856901 | -1.356085 |
| N  | -4.558388 | 3.544025  | -1.310277 |
| H  | -5.000853 | 4.416900  | -1.028006 |
| H  | -4.328805 | 3.611030  | -2.300811 |
| N  | -2.090816 | 4.968670  | -0.928265 |
| H  | -2.731962 | 5.485886  | -1.525993 |

|   |           |           |           |
|---|-----------|-----------|-----------|
| H | -1.830896 | 5.563981  | -0.145141 |
| N | 4.578669  | 2.455412  | -1.875596 |
| H | 4.599975  | 3.130751  | -2.636294 |
| H | 5.386322  | 2.626740  | -1.279048 |
| N | 2.257508  | 4.225371  | -1.701696 |
| H | 2.717407  | 4.381640  | -2.595475 |
| H | 1.255140  | 4.107327  | -1.857345 |
| N | 2.090816  | -4.968670 | -0.928265 |
| H | 1.252505  | -4.733700 | -1.460263 |
| H | 2.731962  | -5.485886 | -1.525993 |
| N | 4.558388  | -3.544025 | -1.310277 |
| H | 5.234629  | -2.791377 | -1.197160 |
| H | 5.000853  | -4.416900 | -1.028006 |
| N | -4.578669 | -2.455412 | -1.875596 |
| H | -4.599975 | -3.130751 | -2.636294 |
| H | -5.386322 | -2.626740 | -1.279048 |
| N | -2.257508 | -4.225371 | -1.701696 |
| H | -2.717407 | -4.381640 | -2.595475 |
| H | -1.255140 | -4.107327 | -1.857345 |
| H | 1.830896  | -5.563981 | -0.145141 |
| H | -2.421255 | -5.037192 | -1.111144 |
| H | -4.671586 | -1.523625 | -2.275792 |
| H | 4.328805  | -3.611030 | -2.300811 |
| H | 2.421255  | 5.037192  | -1.111144 |
| H | -5.234629 | 2.791377  | -1.197160 |
| H | -1.252505 | 4.733700  | -1.460263 |
| H | 4.671586  | 1.523625  | -2.275792 |
| C | 0.946309  | -2.826534 | 2.062452  |
| H | -2.383427 | -2.297800 | 2.126209  |
| C | -0.946309 | 2.826534  | 2.062452  |
| H | 2.383427  | 2.297800  | 2.126209  |
| N | 2.008008  | -3.008355 | 2.837385  |
| N | 5.166831  | -2.492653 | 1.771991  |
| N | -2.008008 | 3.008355  | 2.837385  |
| N | -5.166831 | 2.492653  | 1.771991  |
| H | 1.916796  | -2.960501 | 3.837967  |
| H | 2.906209  | -3.249904 | 2.454238  |
| H | 4.876718  | -3.400440 | 1.440314  |
| H | 5.925979  | -2.452476 | 2.431233  |
| H | -2.906209 | 3.249904  | 2.454238  |
| H | -1.916796 | 2.960501  | 3.837967  |
| H | -5.925979 | 2.452476  | 2.431233  |
| H | -4.876718 | 3.400440  | 1.440314  |

**Pd-C-Ib (M11L, SMD water)**

|    |           |           |           |
|----|-----------|-----------|-----------|
| Pd | 2.008180  | 3.516783  | 0.258749  |
| Pd | 3.798029  | -1.858902 | -0.018760 |
| Pd | -1.707607 | -3.531233 | -0.276338 |
| Pd | -3.483680 | 2.055514  | -0.690023 |
| C  | 2.575177  | 0.927688  | -3.056924 |
| C  | -0.911837 | 1.452504  | 2.634087  |
| C  | -1.999926 | 1.585195  | 1.819194  |
| H  | -2.983637 | 1.243997  | 2.138810  |
| C  | 1.844973  | -1.522764 | 2.149620  |
| C  | -5.223641 | -1.509774 | 0.888678  |
| H  | 2.735091  | -1.130493 | 2.637304  |
| C  | 0.656135  | -1.620576 | 2.810286  |
| C  | -4.260686 | -2.424732 | 0.583036  |
| H  | -4.386019 | -3.476857 | 0.840113  |
| H  | -6.141618 | -1.789579 | 1.391980  |

|   |           |           |           |
|---|-----------|-----------|-----------|
| H | 0.545966  | -1.301962 | 3.840803  |
| H | -0.987643 | 0.997240  | 3.615632  |
| N | -0.283307 | -2.574844 | 0.830300  |
| N | 1.990233  | -1.910037 | 0.869219  |
| N | -3.102915 | -2.095703 | -0.025069 |
| N | -3.831026 | 0.149737  | -0.115041 |
| N | -1.928071 | 2.135816  | 0.591775  |
| N | 0.385741  | 2.493671  | 0.927427  |
| N | 3.256231  | -0.237589 | -1.089292 |
| N | 2.546962  | 2.004572  | -0.940704 |
| C | 2.324657  | 2.013045  | -2.266526 |
| H | 1.932406  | 2.939825  | -2.682769 |
| H | 2.396457  | 0.944891  | -4.125798 |
| C | -4.963164 | -0.170924 | 0.546890  |
| C | 0.325147  | 1.908725  | 2.142882  |
| C | 3.028982  | -0.243133 | -2.419423 |
| C | -0.430305 | -2.184583 | 2.114492  |
| C | 3.061384  | 0.891598  | -0.348380 |
| O | 3.368163  | 0.905635  | 0.877102  |
| C | 0.917740  | -2.405131 | 0.189535  |
| O | 1.032441  | -2.733864 | -1.025883 |
| C | -2.888369 | -0.801012 | -0.411472 |
| O | -1.853805 | -0.485985 | -1.056492 |
| C | -0.720570 | 2.586515  | 0.136099  |
| O | -0.617554 | 3.106873  | -1.013226 |
| N | 1.466056  | 5.071783  | 1.456888  |
| H | 1.399113  | 5.936170  | 0.922431  |
| H | 0.561900  | 4.895501  | 1.890809  |
| N | 3.600261  | 4.600144  | -0.397745 |
| H | 3.321677  | 5.539827  | -0.674010 |
| H | 4.299068  | 4.676979  | 0.338745  |
| N | 4.364821  | -3.476221 | 1.082687  |
| H | 4.624529  | -4.252598 | 0.477170  |
| H | 5.166432  | -3.244981 | 1.667081  |
| N | 5.652889  | -1.822479 | -0.861472 |
| H | 5.802882  | -0.953062 | -1.369091 |
| H | 6.370921  | -1.898307 | -0.142990 |
| N | -0.397211 | -5.078108 | -0.466182 |
| H | -0.085433 | -5.388916 | 0.451277  |
| H | -0.782824 | -5.880488 | -0.958531 |
| N | -3.059521 | -4.552937 | -1.405057 |
| H | -3.471887 | -5.310426 | -0.863020 |
| H | -3.809145 | -3.941276 | -1.721454 |
| N | -3.225062 | 4.006242  | -1.216695 |
| H | -3.696689 | 4.255574  | -2.082620 |
| H | -3.565686 | 4.617121  | -0.478583 |
| N | -5.038116 | 1.938301  | -2.002415 |
| H | -5.404832 | 0.990081  | -2.056794 |
| H | -5.799542 | 2.560328  | -1.736633 |
| H | 0.402556  | -4.710727 | -0.980651 |
| H | 3.606117  | -3.783785 | 1.687745  |
| H | 5.770516  | -2.597816 | -1.510958 |
| H | 4.030718  | 4.144695  | -1.199900 |
| H | 2.154333  | 5.205321  | 2.195319  |
| H | -2.216068 | 4.121962  | -1.325815 |
| H | -2.614694 | -4.956646 | -2.227822 |
| H | -4.722407 | 2.204926  | -2.933753 |
| N | -5.813614 | 0.802629  | 0.853571  |
| N | 1.456703  | 1.812165  | 2.833025  |
| N | -1.600732 | -2.370278 | 2.712940  |

|   |           |           |           |
|---|-----------|-----------|-----------|
| N | 3.251053  | -1.365252 | -3.094973 |
| H | -6.667828 | 0.593398  | 1.342547  |
| H | -5.597168 | 1.768841  | 0.660609  |
| H | -2.366030 | -2.817909 | 2.238008  |
| H | -1.721046 | -2.112231 | 3.677545  |
| H | 3.462527  | -2.227249 | -2.616717 |
| H | 3.074958  | -1.401663 | -4.084639 |
| H | 1.453862  | 1.333747  | 3.719455  |
| H | 2.334013  | 1.868703  | 2.325488  |

| <b>Pd-C-IIb1 (M11L, SMD water)</b> |           |           |           |
|------------------------------------|-----------|-----------|-----------|
| Pd                                 | -0.848513 | 3.605796  | 0.130786  |
| Pd                                 | -4.397665 | -0.861801 | -0.092923 |
| Pd                                 | 0.751490  | -3.489914 | -0.614337 |
| Pd                                 | 4.331179  | 1.103615  | -0.316026 |
| C                                  | 1.356014  | 0.970055  | 2.676271  |
| C                                  | -2.421249 | -1.213633 | 2.139882  |
| C                                  | -1.213677 | -1.673989 | 2.695556  |
| C                                  | -0.323808 | -2.279153 | 1.854980  |
| H                                  | -1.000667 | -1.541223 | 3.750482  |
| H                                  | 0.628044  | -2.653105 | 2.229288  |
| N                                  | -0.561055 | -2.455620 | 0.540013  |
| N                                  | 0.499633  | 2.324832  | 0.913083  |
| N                                  | 2.727376  | 1.558419  | 0.818482  |
| C                                  | 3.159305  | -3.256604 | 1.082619  |
| C                                  | 4.400305  | -2.716191 | 1.464749  |
| C                                  | 4.739987  | -1.505272 | 0.935801  |
| H                                  | 5.054425  | -3.246840 | 2.146382  |
| H                                  | 5.684900  | -1.024676 | 1.186661  |
| N                                  | 3.937956  | -0.825749 | 0.095568  |
| N                                  | 2.365987  | -2.584864 | 0.218807  |
| H                                  | 3.775616  | 3.485002  | -0.813478 |
| H                                  | 5.138569  | 3.510461  | 0.146152  |
| H                                  | 5.283543  | 3.241941  | -1.476549 |
| H                                  | 6.754556  | 1.168208  | -1.208959 |
| H                                  | 6.196481  | -0.381492 | -1.310457 |
| H                                  | 5.736119  | 0.734306  | -2.432972 |
| H                                  | 2.118179  | -5.505760 | -1.462523 |
| H                                  | 1.773241  | -4.519932 | -2.740808 |
| H                                  | 2.994921  | -4.126195 | -1.706320 |
| H                                  | -0.484829 | -5.084665 | -2.272558 |
| H                                  | -1.123294 | -5.233494 | -0.759041 |
| H                                  | -1.494769 | -3.896354 | -1.677953 |
| H                                  | -2.690671 | 5.402144  | 0.133162  |
| H                                  | -1.662051 | 5.698935  | -1.123049 |
| H                                  | -2.815928 | 4.527115  | -1.261503 |
| H                                  | 0.745350  | 4.712265  | 1.824193  |
| H                                  | 0.310894  | 5.834893  | 0.693665  |
| H                                  | -0.727154 | 5.452924  | 1.919437  |
| H                                  | -5.240971 | -3.227345 | 0.400775  |
| H                                  | -4.984803 | -2.475490 | 1.844453  |
| H                                  | -6.362209 | -2.171919 | 0.993662  |
| H                                  | -6.556600 | -1.206702 | -1.468043 |
| H                                  | -6.802448 | 0.004594  | -0.374965 |
| H                                  | -5.974645 | 0.307770  | -1.768037 |
| N                                  | -6.135308 | -0.384705 | -1.038987 |
| N                                  | -5.363856 | -2.352496 | 0.907031  |
| N                                  | -0.033031 | 5.074863  | 1.277128  |
| N                                  | -2.159948 | 4.966988  | -0.619289 |
| N                                  | 4.698973  | 3.074583  | -0.660885 |

|   |           |           |           |
|---|-----------|-----------|-----------|
| N | 5.946346  | 0.595824  | -1.446230 |
| N | 2.064043  | -4.534548 | -1.764325 |
| N | -0.764643 | -4.569076 | -1.441200 |
| N | -2.659862 | -1.382793 | 0.822929  |
| C | 2.734728  | -1.361935 | -0.272382 |
| O | 1.974978  | -0.750702 | -1.072609 |
| C | 1.699622  | 2.267752  | 0.273281  |
| O | 1.855663  | 2.893747  | -0.819641 |
| C | -1.737238 | -1.987991 | 0.013826  |
| O | -1.990479 | -2.123288 | -1.215687 |
| C | -2.127589 | 1.056134  | -3.064555 |
| H | -1.895001 | 0.884425  | -4.109264 |
| N | -3.403581 | 0.549981  | -1.120238 |
| N | -1.710048 | 2.181870  | -1.007663 |
| C | -2.736238 | 1.507072  | -0.419259 |
| O | -3.069285 | 1.780896  | 0.771145  |
| H | 3.306005  | -4.959981 | 2.180328  |
| H | -3.203277 | -0.477320 | 3.862720  |
| N | -3.359441 | -0.632007 | 2.880525  |
| N | 2.737761  | -4.430180 | 1.540785  |
| H | 1.835704  | -4.798628 | 1.278194  |
| H | -4.145774 | -0.172163 | 2.446875  |
| C | 2.542785  | 0.942428  | 2.003428  |
| H | 1.223039  | 0.458797  | 3.623440  |
| C | -3.114031 | 0.364943  | -2.421928 |
| C | -1.358907 | 1.946243  | -2.290186 |
| C | 0.291228  | 1.669547  | 2.077054  |
| H | -3.701969 | -0.391800 | -2.938635 |
| H | 3.402885  | 0.410630  | 2.407082  |
| N | -0.919012 | 1.732936  | 2.615712  |
| H | -1.101871 | 1.227224  | 3.467356  |
| H | -1.714557 | 2.019256  | 2.046836  |
| N | -0.287746 | 2.574623  | -2.759956 |
| H | 0.379403  | 2.985908  | -2.111206 |
| H | 0.004801  | 2.412441  | -3.709371 |

**Pd-C-IIb2 (M11L, SMD water)**

|    |           |           |           |
|----|-----------|-----------|-----------|
| Pd | 4.299140  | -1.177823 | -0.090702 |
| Pd | 1.259504  | 3.630612  | 0.277832  |
| Pd | -3.956248 | 1.362396  | -0.511558 |
| Pd | -0.871336 | -3.668610 | -0.471419 |
| C  | 2.354559  | -1.346226 | 2.122971  |
| C  | 1.223220  | -1.731632 | 2.781999  |
| H  | 3.177774  | -0.861446 | 2.646540  |
| C  | -0.062489 | 1.713610  | 2.141470  |
| C  | -1.187306 | 1.043566  | 2.662087  |
| C  | -2.340430 | 1.094357  | 1.931999  |
| H  | -1.125408 | 0.494242  | 3.595447  |
| H  | -3.240768 | 0.586730  | 2.273500  |
| N  | -2.441534 | 1.761139  | 0.764504  |
| N  | 2.527093  | -1.548705 | 0.804655  |
| N  | 0.391221  | -2.573420 | 0.706332  |
| C  | -4.775381 | -1.207029 | 0.679525  |
| C  | -4.679705 | -2.578490 | 0.976360  |
| C  | -3.538187 | -3.213936 | 0.588610  |
| H  | -5.474104 | -3.094139 | 1.504010  |
| H  | -3.391150 | -4.275385 | 0.793424  |
| N  | -2.525032 | -2.587579 | -0.043724 |
| N  | -3.792221 | -0.594382 | -0.013642 |
| H  | 1.080800  | -5.278237 | 0.003028  |

|   |           |           |           |
|---|-----------|-----------|-----------|
| H | 0.466370  | -5.673210 | -1.475125 |
| H | 1.414432  | -4.315405 | -1.306723 |
| H | -1.589146 | -4.974739 | -2.572152 |
| H | -2.174251 | -5.749304 | -1.236252 |
| H | -2.946766 | -4.413353 | -1.825815 |
| H | -5.172715 | 1.214999  | -2.762156 |
| H | -5.638157 | -0.079967 | -1.856657 |
| H | -6.307359 | 1.404449  | -1.579436 |
| H | -4.672476 | 3.480949  | -1.849274 |
| H | -4.699006 | 3.809481  | -0.230682 |
| H | -3.235553 | 3.695108  | -1.026671 |
| H | 6.046221  | -0.008677 | -1.577243 |
| H | 6.825813  | -0.699832 | -0.297529 |
| H | 6.353532  | -1.631004 | -1.575455 |
| H | 4.419484  | -3.546305 | 0.888715  |
| H | 5.963097  | -3.096625 | 0.519517  |
| H | 5.238807  | -2.519755 | 1.884811  |
| H | 0.306414  | 5.931397  | 0.924637  |
| H | -0.265110 | 4.807564  | 1.989899  |
| H | 1.269245  | 5.396844  | 2.154563  |
| H | 2.268003  | 5.696140  | -0.884951 |
| H | 3.269660  | 5.237200  | 0.344992  |
| H | 3.292036  | 4.416825  | -1.087225 |
| N | 2.690862  | 4.895333  | -0.419447 |
| N | 0.560389  | 5.116212  | 1.479811  |
| N | 5.080376  | -2.772591 | 0.910973  |
| N | 6.092486  | -0.839351 | -0.990286 |
| N | 0.704085  | -4.896464 | -0.862268 |
| N | -2.034756 | -4.836440 | -1.666388 |
| N | -5.446606 | 0.919463  | -1.826237 |
| N | -4.187987 | 3.330021  | -0.967995 |
| N | -0.186848 | 2.420852  | 0.997196  |
| C | -2.650361 | -1.265030 | -0.371177 |
| O | -1.743772 | -0.671956 | -1.014264 |
| C | 1.527826  | -2.130090 | 0.078554  |
| O | 1.654695  | -2.287969 | -1.169277 |
| C | -1.355640 | 2.446087  | 0.302066  |
| O | -1.425654 | 3.128222  | -0.765007 |
| C | 2.334571  | 1.113174  | -3.023341 |
| C | 3.204810  | 0.271947  | -2.392126 |
| H | 2.110130  | 1.018802  | -4.079548 |
| N | 1.996223  | 2.185262  | -0.921325 |
| N | 3.475225  | 0.361037  | -1.076876 |
| C | 2.921828  | 1.367873  | -0.345507 |
| O | 3.268196  | 1.555358  | 0.857798  |
| H | -6.581690 | -0.914969 | 1.560081  |
| H | 1.249833  | 1.152328  | 3.567686  |
| N | 1.124476  | 1.704541  | 2.734907  |
| N | -5.820510 | -0.483449 | 1.062893  |
| H | -5.857993 | 0.510416  | 0.895452  |
| H | 1.953226  | 1.945437  | 2.193503  |
| H | 1.096615  | -1.564131 | 3.845867  |
| C | 1.656718  | 2.051968  | -2.222063 |
| C | 0.229601  | -2.391027 | 2.034621  |
| N | -0.864828 | -2.867380 | 2.616264  |
| N | 0.680039  | 2.822233  | -2.687704 |
| H | 3.704467  | -0.532698 | -2.930230 |
| H | -1.002574 | -2.757967 | 3.606444  |
| H | -1.555968 | -3.374320 | 2.090336  |
| H | 0.030573  | 3.248490  | -2.031603 |

|                                    |           |           |           |
|------------------------------------|-----------|-----------|-----------|
| H                                  | 0.400301  | 2.733323  | -3.650550 |
| <b>Pd-C-IIb3 (M11L, SMD water)</b> |           |           |           |
| Pd                                 | -2.239041 | 3.408163  | 0.257838  |
| Pd                                 | -3.844423 | -2.099372 | 0.069547  |
| Pd                                 | 1.728382  | -3.350147 | -0.632719 |
| Pd                                 | 3.340695  | 2.321962  | -0.513712 |
| C                                  | -0.415364 | 2.425670  | 2.359917  |
| C                                  | 0.775604  | 2.105119  | 2.943685  |
| H                                  | -1.345676 | 2.419785  | 2.925621  |
| C                                  | -1.865910 | -2.183093 | 2.242794  |
| C                                  | -0.673966 | -2.423149 | 2.860126  |
| H                                  | -0.561379 | -2.349843 | 3.935769  |
| N                                  | 0.265650  | -2.865254 | 0.708760  |
| N                                  | -0.509281 | 2.788616  | 1.068211  |
| N                                  | 1.819426  | 2.468505  | 0.826495  |
| C                                  | 4.194841  | -2.225910 | 0.556262  |
| C                                  | 5.135838  | -1.230769 | 0.868036  |
| C                                  | 4.815167  | 0.050242  | 0.529588  |
| H                                  | 6.078117  | -1.482162 | 1.340243  |
| H                                  | 5.505853  | 0.870988  | 0.724614  |
| N                                  | 3.651841  | 0.381244  | -0.061400 |
| N                                  | 3.020902  | -1.896891 | -0.025656 |
| H                                  | 3.394605  | 4.874219  | -0.153129 |
| H                                  | 3.650061  | 4.596218  | -1.759832 |
| H                                  | 2.122631  | 4.425273  | -1.127571 |
| H                                  | 4.438185  | 2.324180  | -2.832505 |
| H                                  | 5.531812  | 2.918837  | -1.749563 |
| H                                  | 5.291894  | 1.291367  | -1.873373 |
| H                                  | 3.489519  | -4.767575 | -1.902190 |
| H                                  | 2.630055  | -3.852014 | -2.971606 |
| H                                  | 3.849138  | -3.166515 | -2.103555 |
| H                                  | 0.947425  | -5.369400 | -2.079180 |
| H                                  | 0.479903  | -5.598928 | -0.513883 |
| H                                  | -0.339194 | -4.510439 | -1.470618 |
| H                                  | -4.690847 | 4.193823  | 0.217865  |
| H                                  | -3.866180 | 4.983785  | -0.973271 |
| H                                  | -4.370782 | 3.429977  | -1.207786 |
| H                                  | -1.411326 | 5.033655  | 2.091063  |
| H                                  | -1.954410 | 5.905688  | 0.801373  |
| H                                  | -3.030431 | 5.261265  | 1.875439  |
| H                                  | -4.755091 | -4.491910 | 0.414716  |
| H                                  | -3.724693 | -4.146406 | 1.652580  |
| H                                  | -5.258748 | -3.541905 | 1.665750  |
| H                                  | -5.924993 | -2.798658 | -1.284837 |
| H                                  | -6.408822 | -1.833846 | -0.036184 |
| H                                  | -5.752261 | -1.161873 | -1.391781 |
| N                                  | -5.700607 | -1.956644 | -0.757772 |
| N                                  | -4.465522 | -3.766255 | 1.067435  |
| N                                  | -2.149000 | 5.099173  | 1.392004  |
| N                                  | -3.997307 | 4.081353  | -0.519767 |
| N                                  | 3.118325  | 4.298368  | -0.944739 |
| N                                  | 4.828337  | 2.197505  | -1.899953 |
| N                                  | 3.090278  | -3.843916 | -2.062301 |
| N                                  | 0.574906  | -4.906674 | -1.253138 |
| N                                  | -2.023128 | -2.284942 | 0.910530  |
| C                                  | 2.733484  | -0.591893 | -0.344397 |
| O                                  | 1.644755  | -0.307568 | -0.909668 |
| C                                  | 0.607027  | 2.800256  | 0.289942  |

|   |           |           |           |
|---|-----------|-----------|-----------|
| O | 0.528454  | 3.137576  | -0.926807 |
| C | -0.948857 | -2.592329 | 0.129496  |
| O | -1.071559 | -2.661904 | -1.126125 |
| C | -2.583709 | 0.585788  | -2.949916 |
| H | -2.433357 | 0.553067  | -4.022825 |
| N | -3.267747 | -0.457779 | -0.927056 |
| N | -2.414563 | 1.738320  | -0.868544 |
| C | -2.943402 | 0.660178  | -0.217579 |
| O | -3.146312 | 0.712385  | 1.028705  |
| H | 5.305345  | -3.771979 | 1.261730  |
| N | 4.432856  | -3.506700 | 0.835748  |
| H | 3.806228  | -4.241412 | 0.542006  |
| H | 0.846260  | 1.836093  | 3.991210  |
| C | -3.101402 | -0.473584 | -2.260833 |
| C | 1.929063  | 2.168442  | 2.138521  |
| N | 3.137712  | 1.956985  | 2.643573  |
| H | 3.248026  | 1.734410  | 3.618265  |
| H | 3.965848  | 2.082486  | 2.085447  |
| C | 0.411525  | -2.806802 | 2.049477  |
| C | -2.195592 | 1.711164  | -2.200991 |
| H | -2.752975 | -1.908057 | 2.812448  |
| H | -3.392897 | -1.391234 | -2.769466 |
| N | -1.623095 | 2.777605  | -2.752584 |
| N | 1.582651  | -3.130877 | 2.583556  |
| H | -1.081171 | 3.388514  | -2.152419 |
| H | -1.424254 | 2.776659  | -3.739475 |
| H | 1.709657  | -3.103740 | 3.581030  |
| H | 2.353502  | -3.442426 | 2.016602  |

|                                    |           |           |           |
|------------------------------------|-----------|-----------|-----------|
| <b>Pd-C-IIb4 (M11L, SMD water)</b> |           |           |           |
| Pd                                 | -3.231872 | 2.603931  | -0.142725 |
| Pd                                 | -2.764327 | -3.003922 | 0.412532  |
| Pd                                 | 2.884736  | -2.933655 | -0.697049 |
| Pd                                 | 2.493513  | 2.895579  | -0.336001 |
| C                                  | -0.298626 | 2.003284  | 2.855467  |
| C                                  | -0.707179 | -1.675991 | 2.153560  |
| C                                  | 0.618962  | -1.497136 | 2.593103  |
| C                                  | 1.616896  | -1.960287 | 1.783162  |
| H                                  | 0.831367  | -1.005706 | 3.536492  |
| H                                  | 2.662210  | -1.864727 | 2.072630  |
| N                                  | 1.379752  | -2.555598 | 0.598517  |
| N                                  | -1.484407 | 2.307050  | 0.819921  |
| N                                  | 0.879679  | 2.448158  | 0.824978  |
| C                                  | 4.856425  | -1.123970 | 0.436254  |
| C                                  | 5.400483  | 0.022257  | 0.936490  |
| H                                  | 6.350949  | 0.028062  | 1.456482  |
| N                                  | 3.490979  | 1.184906  | 0.094312  |
| N                                  | 3.680828  | -1.148921 | -0.218929 |
| H                                  | 2.173731  | 5.280720  | -1.346849 |
| H                                  | 0.741060  | 4.435784  | -1.272496 |
| H                                  | 1.357493  | 5.167689  | 0.082400  |
| H                                  | 4.479529  | 4.269842  | -1.271385 |
| H                                  | 4.729379  | 2.682076  | -1.648821 |
| H                                  | 3.644551  | 3.569669  | -2.511129 |
| H                                  | 4.854364  | -4.168481 | -1.828831 |
| H                                  | 4.033350  | -3.295210 | -2.962631 |
| H                                  | 5.105487  | -2.543498 | -1.962566 |
| H                                  | 1.141358  | -4.652356 | -1.192253 |
| H                                  | 2.523897  | -5.196895 | -1.953526 |
| H                                  | 2.341871  | -5.426888 | -0.329684 |

|   |           |           |           |
|---|-----------|-----------|-----------|
| H | -5.749126 | 3.095294  | -0.365549 |
| H | -4.968643 | 3.766269  | -1.656719 |
| H | -5.290874 | 2.146984  | -1.633748 |
| H | -2.608533 | 4.593824  | 1.387365  |
| H | -3.684671 | 5.121955  | 0.254000  |
| H | -4.214733 | 4.260378  | 1.557160  |
| H | -1.686943 | -4.483407 | 2.225182  |
| H | -3.326643 | -4.517228 | 2.420733  |
| H | -2.615100 | -5.437823 | 1.250472  |
| H | -4.492744 | -4.740963 | -0.406469 |
| H | -5.253342 | -3.638632 | 0.559116  |
| H | -4.890384 | -3.254357 | -1.004009 |
| N | -4.560786 | -3.751012 | -0.178808 |
| N | -2.576470 | -4.541885 | 1.733034  |
| N | -3.458196 | 4.352577  | 0.881198  |
| N | -5.019112 | 2.942736  | -1.059456 |
| N | 1.597656  | 4.669507  | -0.771652 |
| N | 4.022831  | 3.412203  | -1.577799 |
| N | 4.400006  | -3.275928 | -2.012752 |
| N | 2.149505  | -4.790544 | -1.099255 |
| N | -0.941409 | -2.325630 | 0.993155  |
| C | 2.983022  | 0.012709  | -0.406124 |
| O | 1.896580  | 0.018470  | -1.041486 |
| C | -0.311419 | 2.463655  | 0.144393  |
| O | -0.316558 | 2.651111  | -1.104138 |
| C | 0.086856  | -2.729027 | 0.192425  |
| O | -0.172885 | -3.282880 | -0.915300 |
| C | -2.696266 | -0.534557 | -3.041457 |
| H | -2.528872 | -0.644992 | -4.106637 |
| N | -2.951218 | -1.487642 | -0.883123 |
| N | -3.053598 | 0.854816  | -1.135762 |
| C | -3.167566 | -0.253612 | -0.348928 |
| O | -3.482526 | -0.134542 | 0.869304  |
| H | -1.616921 | -0.728342 | 3.690326  |
| N | -1.761077 | -1.256263 | 2.844911  |
| H | -2.641939 | -1.143202 | 2.352845  |
| H | -0.289921 | 1.811616  | 3.922688  |
| C | -2.738508 | -1.612311 | -2.204326 |
| C | -2.826055 | 0.741096  | -2.461575 |
| C | -1.460870 | 2.070079  | 2.144237  |
| H | -2.599809 | -2.625338 | -2.577569 |
| N | -2.745042 | 1.849275  | -3.189747 |
| H | -2.719955 | 2.757221  | -2.753244 |
| H | -2.558795 | 1.791419  | -4.176566 |
| C | 0.904092  | 2.225483  | 2.156322  |
| C | 4.670812  | 1.208278  | 0.749892  |
| N | 2.068795  | 2.239875  | 2.793514  |
| N | 5.113287  | 2.373817  | 1.217235  |
| H | 4.627537  | 3.239857  | 1.037153  |
| H | 5.993590  | 2.418568  | 1.703575  |
| H | 2.101366  | 2.087556  | 3.787185  |
| H | 2.931130  | 2.445172  | 2.317564  |
| H | -2.429604 | 1.944376  | 2.626360  |
| H | 5.361716  | -2.082629 | 0.551300  |

**Pd-C-IIIb1 (M11L, SMD water)**

|    |           |           |           |
|----|-----------|-----------|-----------|
| Pd | -4.087431 | 1.052196  | -0.449927 |
| Pd | -0.370023 | -3.586901 | -0.557530 |
| Pd | 4.579335  | -0.710630 | 0.111083  |
| Pd | 0.938615  | 3.633178  | 0.192042  |

|   |           |           |           |
|---|-----------|-----------|-----------|
| C | -0.211683 | 1.695339  | 2.115047  |
| C | 2.357586  | 1.117144  | -2.967050 |
| H | 0.779775  | 1.778537  | 2.559363  |
| C | -1.212948 | 0.993267  | 2.723237  |
| C | 2.548964  | -1.059158 | 2.211639  |
| C | -4.365815 | -3.081840 | 0.614405  |
| H | 3.312411  | -0.526282 | 2.776641  |
| C | 1.397326  | -1.489977 | 2.802199  |
| C | -3.106520 | -3.509349 | 0.325398  |
| H | -2.812242 | -4.544067 | 0.506716  |
| H | -5.117522 | -3.743069 | 1.029776  |
| H | 1.191280  | -1.315037 | 3.852350  |
| H | -1.065408 | 0.491353  | 3.673664  |
| N | 0.751622  | -2.417173 | 0.693829  |
| N | 2.820121  | -1.280270 | 0.912569  |
| N | -2.151438 | -2.702017 | -0.179881 |
| N | -3.704726 | -0.918946 | -0.156536 |
| N | -2.611218 | 1.527406  | 0.861470  |
| N | -0.397088 | 2.341576  | 0.949745  |
| N | 3.576592  | 0.635973  | -0.981648 |
| N | 1.829508  | 2.210138  | -0.919337 |
| C | 3.347337  | 0.457650  | -2.294530 |
| H | 2.171060  | 0.948383  | -4.021512 |
| H | 3.988112  | -0.265231 | -2.796349 |
| C | -4.650340 | -1.726949 | 0.368965  |
| C | -2.464514 | 0.958250  | 2.077671  |
| C | 1.532994  | 1.974393  | -2.213917 |
| C | 0.497151  | -2.224876 | 2.006349  |
| C | -2.444753 | -1.389808 | -0.438205 |
| O | -1.584850 | -0.628269 | -0.952679 |
| C | -1.584808 | 2.231035  | 0.299489  |
| O | -1.742083 | 2.797139  | -0.824436 |
| C | 1.896472  | -1.908545 | 0.130646  |
| O | 2.104707  | -2.057555 | -1.106768 |
| C | 2.839991  | 1.549823  | -0.288339 |
| O | 3.094543  | 1.802234  | 0.924068  |
| N | 1.307445  | -4.685411 | -0.915549 |
| H | 1.668669  | -5.075410 | -0.047337 |
| H | 1.154498  | -5.450315 | -1.569014 |
| N | -1.374404 | -4.806168 | -1.841848 |
| H | -0.881689 | -4.871276 | -2.731252 |
| H | -1.454488 | -5.744270 | -1.452681 |
| N | -5.456812 | 0.589638  | -1.888664 |
| H | -5.473607 | -0.408227 | -2.090883 |
| H | -6.398139 | 0.880814  | -1.629188 |
| N | -4.531364 | 3.023508  | -0.673156 |
| H | -3.631468 | 3.474934  | -0.842406 |
| H | -5.163501 | 3.217355  | -1.446464 |
| N | 2.301172  | 4.945370  | -0.563746 |
| H | 2.261409  | 5.864632  | -0.128395 |
| H | 3.237259  | 4.567820  | -0.428908 |
| N | 0.085367  | 5.101337  | 1.317666  |
| H | 0.752042  | 5.468716  | 1.994482  |
| H | -0.229374 | 5.871280  | 0.730634  |
| N | 6.356593  | -0.133193 | -0.693205 |
| H | 6.239762  | 0.726987  | -1.223977 |
| H | 7.052798  | 0.028466  | 0.032274  |
| N | 5.565542  | -2.082607 | 1.254669  |
| H | 6.263840  | -2.590005 | 0.714810  |
| H | 6.039622  | -1.607971 | 2.021433  |

|   |           |           |           |
|---|-----------|-----------|-----------|
| H | -2.311760 | -4.454890 | -2.027514 |
| H | 1.992388  | -4.035108 | -1.301634 |
| H | -4.942948 | 3.393732  | 0.180275  |
| H | -5.202098 | 1.078802  | -2.745623 |
| H | 2.146358  | 5.058760  | -1.563632 |
| H | -0.717811 | 4.736467  | 1.825674  |
| H | 4.916243  | -2.759059 | 1.651518  |
| H | 6.712436  | -0.851393 | -1.320912 |
| N | -3.520512 | 0.385587  | 2.640396  |
| N | 0.458980  | 2.573671  | -2.715720 |
| N | -5.847146 | -1.221533 | 0.652194  |
| N | -0.596255 | -2.763125 | 2.532569  |
| H | -6.054761 | -0.241424 | 0.537345  |
| H | -6.563676 | -1.816915 | 1.032485  |
| H | -0.798117 | -2.646213 | 3.511025  |
| H | -1.209184 | -3.339327 | 1.981936  |
| H | 0.203966  | 2.415558  | -3.676298 |
| H | -0.236855 | 2.961314  | -2.083931 |
| H | -4.428583 | 0.429234  | 2.206720  |
| H | -3.444579 | -0.041550 | 3.547785  |

**Pd-C-IIIb2 (M11L, SMD water)**

|    |           |           |           |
|----|-----------|-----------|-----------|
| Pd | -0.588186 | 3.636425  | -0.536849 |
| Pd | -4.263249 | -0.920867 | -0.380703 |
| Pd | 0.809738  | -3.602337 | 0.064154  |
| Pd | 4.444199  | 0.790319  | -0.035714 |
| C  | 2.108986  | -0.972747 | -3.060722 |
| C  | 1.240696  | 1.618138  | 2.724593  |
| C  | -4.211684 | 2.936968  | 1.484739  |
| C  | -1.371188 | -1.019494 | 2.687914  |
| H  | -4.826663 | 3.502323  | 2.175296  |
| H  | -1.236282 | -0.546905 | 3.655080  |
| H  | 1.007556  | 1.459230  | 3.771730  |
| N  | -2.740499 | -1.516535 | 0.802360  |
| N  | -0.529041 | -2.333419 | 0.888278  |
| N  | -3.828739 | 0.973814  | 0.180915  |
| N  | -2.238140 | 2.719019  | 0.170400  |
| N  | 0.646735  | 2.480733  | 0.584743  |
| N  | 2.717701  | 1.359929  | 0.869574  |
| N  | 1.686687  | -2.161640 | -1.041151 |
| N  | 3.402517  | -0.551956 | -1.108971 |
| H  | 1.871774  | -0.760263 | -4.097115 |
| C  | -3.019633 | 3.411160  | 1.021715  |
| C  | 0.378641  | 2.267368  | 1.887838  |
| C  | 3.108387  | -0.317032 | -2.400997 |
| C  | -2.554897 | -0.951095 | 2.012466  |
| C  | -2.631537 | 1.481767  | -0.252500 |
| O  | -1.915131 | 0.815471  | -1.048567 |
| C  | 1.824636  | 2.013560  | 0.065875  |
| O  | 2.107654  | 2.199653  | -1.151496 |
| C  | -1.720929 | -2.227360 | 0.241778  |
| O  | -1.876693 | -2.809117 | -0.875117 |
| C  | 2.725375  | -1.521976 | -0.436442 |
| O  | 3.059784  | -1.839716 | 0.743148  |
| N  | -4.689652 | -2.839876 | -0.906027 |
| H  | -5.222127 | -3.305978 | -0.175442 |
| H  | -5.206944 | -2.911057 | -1.779286 |
| N  | -5.764669 | -0.281964 | -1.598150 |
| H  | -5.524637 | -0.496126 | -2.565261 |
| H  | -6.639805 | -0.753430 | -1.377578 |

|   |           |           |           |
|---|-----------|-----------|-----------|
| N | -1.805184 | 4.838497  | -1.641581 |
| H | -2.786933 | 4.658940  | -1.439794 |
| H | -1.616727 | 5.821537  | -1.453193 |
| N | 0.999786  | 4.730850  | -1.190902 |
| H | 1.730473  | 4.058990  | -1.429786 |
| H | 0.776574  | 5.298234  | -2.005690 |
| N | 6.154456  | 0.224278  | -0.983513 |
| H | 6.954853  | 0.810538  | -0.754180 |
| H | 6.380304  | -0.735600 | -0.729889 |
| N | 5.476216  | 2.202258  | 1.009127  |
| H | 6.134266  | 1.771340  | 1.656302  |
| H | 6.002446  | 2.796546  | 0.370474  |
| N | 2.158886  | -4.885610 | -0.758580 |
| H | 3.092352  | -4.491540 | -0.654187 |
| H | 2.157549  | -5.813554 | -0.340960 |
| N | -0.061185 | -5.060354 | 1.189041  |
| H | -1.036772 | -5.154028 | 0.912859  |
| H | 0.382199  | -5.972365 | 1.099329  |
| H | -5.915400 | 0.722233  | -1.528132 |
| H | -3.777050 | -3.288159 | -1.011655 |
| H | 1.330125  | 5.347535  | -0.452454 |
| H | -1.650425 | 4.668523  | -2.633934 |
| H | 6.012158  | 0.258950  | -1.991312 |
| H | 4.847129  | 2.797973  | 1.544154  |
| H | -0.034175 | -4.790609 | 2.171029  |
| H | 1.967640  | -4.985076 | -1.753874 |
| H | 3.703690  | 0.448553  | -2.895364 |
| C | 1.331733  | -1.877297 | -2.312579 |
| C | -0.312041 | -1.709547 | 2.067383  |
| H | -3.409975 | -0.425367 | 2.433927  |
| H | -0.572889 | 2.652778  | 2.252460  |
| C | 2.453165  | 1.158177  | 2.177943  |
| C | -4.611267 | 1.664812  | 1.036058  |
| H | -2.644842 | 4.388098  | 1.325985  |
| N | -5.748176 | 1.109630  | 1.441201  |
| N | 0.900368  | -1.792264 | 2.598083  |
| N | 3.367757  | 0.542946  | 2.919285  |
| N | 0.248342  | -2.471746 | -2.797944 |
| H | -6.007886 | 0.177484  | 1.157354  |
| H | -6.356574 | 1.604251  | 2.071381  |
| H | -0.425530 | -2.887501 | -2.159074 |
| H | -0.046958 | -2.268425 | -3.738636 |
| H | 1.691748  | -2.072161 | 2.020457  |
| H | 1.090812  | -1.307019 | 3.459962  |
| H | 4.179501  | 0.120942  | 2.495451  |
| H | 3.195660  | 0.368474  | 3.895302  |

**Pd-C-IVb (M11L, SMD water)**

|    |           |           |           |
|----|-----------|-----------|-----------|
| Pd | -3.914701 | -1.758614 | -0.470652 |
| Pd | 1.476583  | -3.563352 | 0.356099  |
| Pd | 4.191791  | 1.422882  | -0.157767 |
| Pd | -1.182607 | 3.453241  | -0.533967 |
| C  | 2.293759  | 1.552750  | 2.088481  |
| C  | 2.337601  | -1.054936 | -3.014348 |
| H  | 3.162827  | 1.147067  | 2.604928  |
| C  | 1.162485  | 1.897073  | 2.768208  |
| C  | -4.897509 | 2.034679  | 1.052761  |
| C  | -1.128330 | -1.034536 | 2.633317  |
| C  | -4.895247 | 0.744636  | 0.610276  |
| C  | -2.279846 | -1.200742 | 1.918268  |

|   |           |           |           |
|---|-----------|-----------|-----------|
| H | -3.207928 | -0.730863 | 2.239384  |
| H | -5.729399 | 0.075946  | 0.820333  |
| H | -5.723748 | 2.448859  | 1.618179  |
| H | -1.099369 | -0.434268 | 3.536861  |
| H | 1.080177  | 1.773916  | 3.842496  |
| N | -2.342306 | -1.934317 | 0.788284  |
| N | -0.048838 | -2.434044 | 1.040279  |
| N | -3.881793 | 0.220210  | -0.102142 |
| N | -2.741100 | 2.283852  | 0.049962  |
| N | 0.207755  | 2.582631  | 0.687311  |
| N | 2.412556  | 1.707659  | 0.757961  |
| N | 2.112936  | -2.109170 | -0.889539 |
| N | 3.458029  | -0.188878 | -1.104571 |
| C | 3.160118  | -0.144695 | -2.415891 |
| H | 3.594914  | 0.680158  | -2.978234 |
| H | 2.088008  | -0.995345 | -4.067505 |
| C | -3.773620 | 2.815216  | 0.740279  |
| C | 0.105038  | 2.460626  | 2.028613  |
| C | 1.741077  | -2.023123 | -2.185457 |
| C | 0.035524  | -1.658398 | 2.142457  |
| C | -2.785922 | 0.986952  | -0.394213 |
| O | -1.832328 | 0.520832  | -1.072066 |
| C | 1.351692  | 2.178776  | 0.040224  |
| O | 1.423657  | 2.267698  | -1.217606 |
| C | 2.981766  | -1.212528 | -0.343998 |
| O | 3.348918  | -1.342158 | 0.860589  |
| C | -1.215917 | -2.568770 | 0.354391  |
| O | -1.245020 | -3.307027 | -0.676533 |
| H | -4.488672 | -4.041410 | -1.600514 |
| H | -3.016362 | -4.060960 | -0.820694 |
| H | -4.438384 | -4.230073 | 0.038126  |
| H | -5.981493 | -2.363172 | -1.947626 |
| H | -6.148766 | -0.830190 | -1.371459 |
| H | -5.131576 | -1.128638 | -2.633690 |
| H | -0.083027 | 5.493215  | -1.742567 |
| H | 0.666459  | 5.222022  | -0.298708 |
| H | 0.978494  | 4.217448  | -1.580799 |
| H | -2.608832 | 5.319426  | -1.630425 |
| H | -2.073900 | 4.267304  | -2.783158 |
| H | -3.372305 | 3.869936  | -1.851236 |
| H | 4.664572  | 3.030569  | 1.794025  |
| H | 5.867349  | 3.250098  | 0.690986  |
| H | 4.379948  | 3.910434  | 0.430038  |
| H | 5.882059  | 0.659641  | -1.943077 |
| H | 6.477086  | 2.027506  | -1.241390 |
| H | 6.593813  | 0.579678  | -0.459144 |
| H | 3.893815  | -4.200522 | -0.165345 |
| H | 3.087654  | -5.613090 | 0.106301  |
| H | 2.920582  | -4.833212 | -1.336885 |
| H | -0.133928 | -5.290628 | 1.322605  |
| H | 1.385123  | -5.860642 | 1.625007  |
| H | 0.753469  | -4.656537 | 2.559289  |
| N | -3.994186 | -3.771624 | -0.753878 |
| N | -5.480459 | -1.498958 | -1.750993 |
| N | 3.021036  | -4.697480 | -0.332774 |
| N | 0.805821  | -5.023201 | 1.610709  |
| N | 5.997398  | 1.148781  | -1.057511 |
| N | 4.866662  | 3.095421  | 0.797791  |
| N | 0.259362  | 4.769863  | -1.114208 |
| N | -2.465904 | 4.333669  | -1.844739 |

|   |           |           |           |
|---|-----------|-----------|-----------|
| N | 0.812607  | -2.864992 | -2.624356 |
| N | -3.682319 | 4.085914  | 1.132085  |
| N | -0.988054 | 2.904119  | 2.637799  |
| N | 1.220062  | -1.540547 | 2.728744  |
| H | 2.062813  | -1.752964 | 2.197512  |
| H | 1.310742  | -0.932887 | 3.526797  |
| H | -1.726191 | 3.370413  | 2.136127  |
| H | -1.070681 | 2.832498  | 3.637713  |
| H | -2.920354 | 4.678254  | 0.834030  |
| H | -4.444416 | 4.512497  | 1.633002  |
| H | 0.515894  | -2.810448 | -3.584818 |
| H | 0.201816  | -3.327255 | -1.956068 |

**Pd-C-Ic (M1 1L, SMD water)**

|    |           |           |           |
|----|-----------|-----------|-----------|
| Pd | 0.660702  | 3.997654  | -0.173656 |
| Pd | 0.310629  | 0.055965  | 4.181774  |
| Pd | -0.660702 | -3.997654 | 0.173656  |
| Pd | -0.310629 | -0.055965 | -4.181774 |
| C  | 2.635125  | -3.209881 | 2.797347  |
| C  | -2.554396 | 2.127447  | 1.855427  |
| C  | -1.749943 | 2.961072  | 1.136544  |
| H  | -2.177702 | 3.766621  | 0.544016  |
| C  | 1.749943  | -2.961072 | -1.136544 |
| C  | -2.635125 | 3.209881  | -2.797347 |
| H  | 2.177702  | -3.766621 | -0.544016 |
| C  | 2.554396  | -2.127447 | -1.855427 |
| C  | -2.199907 | 2.030521  | -3.330280 |
| H  | -2.861532 | 1.420108  | -3.943930 |
| H  | -3.631465 | 3.590905  | -2.989519 |
| H  | 3.634122  | -2.221786 | -1.839936 |
| H  | -3.634122 | 2.221786  | 1.839936  |
| N  | 0.577061  | -1.050651 | -2.640077 |
| N  | 0.407511  | -2.846978 | -1.110163 |
| N  | -0.949914 | 1.559436  | -3.149382 |
| N  | -0.528794 | 3.375821  | -1.698003 |
| N  | -0.407511 | 2.846978  | 1.110163  |
| N  | -0.577061 | 1.050651  | 2.640077  |
| N  | 0.528794  | -3.375821 | 1.698003  |
| N  | 0.949914  | -1.559436 | 3.149382  |
| C  | 2.199907  | -2.030521 | 3.330280  |
| H  | 2.861532  | -1.420108 | 3.943930  |
| H  | 3.631465  | -3.590905 | 2.989519  |
| C  | -1.733645 | 3.912993  | -1.977843 |
| C  | -1.926596 | 1.113535  | 2.596416  |
| C  | 1.733645  | -3.912993 | 1.977843  |
| C  | 1.926596  | -1.113535 | -2.596416 |
| C  | -0.089519 | 2.254515  | -2.347724 |
| O  | 1.103364  | 1.878270  | -2.201583 |
| C  | 0.191881  | 1.899789  | 1.895853  |
| O  | 1.454087  | 1.813043  | 1.949098  |
| C  | 0.089519  | -2.254515 | 2.347724  |
| O  | -1.103364 | -1.878270 | 2.201583  |
| C  | -0.191881 | -1.899789 | -1.895853 |
| O  | -1.454087 | -1.813043 | -1.949098 |
| N  | 1.677820  | 5.145389  | -1.513170 |
| H  | 2.542628  | 5.533821  | -1.142247 |
| H  | 1.903841  | 4.573780  | -2.325421 |
| N  | 1.857660  | 4.582785  | 1.362473  |
| H  | 2.743678  | 4.975278  | 1.051726  |
| H  | 1.388471  | 5.270181  | 1.946547  |



|   |           |           |           |
|---|-----------|-----------|-----------|
| N | -1.080006 | 0.804155  | -5.862842 |
| H | -0.526508 | 0.558170  | -6.682300 |
| H | -2.034844 | 0.485590  | -6.019977 |
| N | 0.279481  | -1.672961 | -5.271777 |
| H | 0.027992  | -2.522877 | -4.770185 |
| H | -0.145904 | -1.715055 | -6.196064 |
| N | -1.857660 | -4.582785 | -1.362473 |
| H | -1.388471 | -5.270181 | -1.946547 |
| H | -2.743678 | -4.975278 | -1.051726 |
| N | -1.677820 | -5.145389 | 1.513170  |
| H | -1.903841 | -4.573780 | 2.325421  |
| H | -2.542628 | -5.533821 | 1.142247  |
| N | 1.080006  | -0.804155 | 5.862842  |
| H | 2.034844  | -0.485590 | 6.019977  |
| H | 0.526508  | -0.558170 | 6.682300  |
| N | -0.279481 | 1.672961  | 5.271777  |
| H | 0.145904  | 1.715055  | 6.196064  |
| H | -0.027992 | 2.522877  | 4.770185  |
| H | -1.291063 | 1.662316  | 5.391570  |
| H | 1.088344  | -1.819454 | 5.787238  |
| H | -2.035936 | -3.734032 | -1.902684 |
| H | -1.086583 | -5.916015 | 1.818389  |
| H | -1.088344 | 1.819454  | -5.787238 |
| H | 1.291063  | -1.662316 | -5.391570 |
| H | 1.086583  | 5.916015  | -1.818389 |
| H | 2.035936  | 3.734032  | 1.902684  |
| N | -2.611415 | 0.220295  | 3.304224  |
| N | -2.029994 | 5.093767  | -1.445155 |
| N | 2.611415  | -0.220295 | -3.304224 |
| N | 2.029994  | -5.093767 | 1.445155  |
| H | -2.152511 | -0.653515 | 3.527733  |
| H | -3.617592 | 0.239444  | 3.280064  |
| H | -1.352810 | 5.589279  | -0.884733 |
| H | -2.927917 | 5.518410  | -1.604446 |
| H | 3.617592  | -0.239444 | -3.280064 |
| H | 2.152511  | 0.653515  | -3.527733 |
| H | 2.927917  | -5.518410 | 1.604446  |
| H | 1.352810  | -5.589279 | 0.884733  |

**Pd-C-IIc1 (M11L, SMD water)**

|    |           |           |           |
|----|-----------|-----------|-----------|
| Pd | 3.913057  | 1.531786  | -0.496839 |
| Pd | 1.313117  | -3.667748 | -0.340589 |
| Pd | -3.995413 | -1.435316 | 0.952099  |
| Pd | -1.465850 | 3.689715  | -0.101757 |
| C  | -1.770011 | -1.933158 | -2.599777 |
| C  | -2.762197 | -1.844232 | -1.669314 |
| H  | -1.958704 | -1.783779 | -3.656831 |
| H  | -3.789721 | -1.651500 | -1.970685 |
| N  | -2.547320 | -1.994862 | -0.347708 |
| C  | -4.473314 | 1.497524  | -2.112268 |
| C  | -3.426554 | 2.304192  | -1.772332 |
| H  | -5.005317 | 1.614214  | -3.049235 |
| H  | -3.080994 | 3.074391  | -2.460344 |
| N  | -2.771984 | 2.215376  | -0.596069 |
| N  | -4.090333 | 0.316280  | -0.081471 |
| H  | 0.619352  | 5.165592  | -0.291830 |
| H  | -0.606536 | 6.149759  | 0.202615  |
| H  | 0.130428  | 5.149992  | 1.284650  |
| H  | -2.824318 | 5.888388  | -0.218627 |
| H  | -2.698836 | 5.257022  | -1.735346 |

|   |           |           |           |
|---|-----------|-----------|-----------|
| H | -3.807016 | 4.651643  | -0.670640 |
| H | -5.418331 | -1.284119 | 3.127017  |
| H | -5.297255 | 0.198031  | 2.412623  |
| H | -6.361706 | -0.917766 | 1.823002  |
| H | -4.281106 | -3.949273 | 1.421170  |
| H | -2.802947 | -3.385299 | 1.950609  |
| H | -4.166964 | -3.190244 | 2.882593  |
| H | 2.923249  | 3.637563  | -1.425752 |
| H | 4.229812  | 4.084104  | -0.492600 |
| H | 4.465153  | 3.561832  | -2.040789 |
| H | 5.232136  | 1.272848  | -2.682140 |
| H | 6.306570  | 1.612340  | -1.475850 |
| H | 5.710605  | 0.080229  | -1.650037 |
| H | 3.718301  | -4.608519 | -0.091456 |
| H | 2.686276  | -5.508911 | 0.834126  |
| H | 2.768821  | -5.751259 | -0.794036 |
| H | 0.471097  | -6.069842 | -0.914411 |
| H | -0.810111 | -5.039451 | -0.847909 |
| H | 0.167898  | -5.051483 | -2.175705 |
| N | 0.155099  | -5.132989 | -1.159868 |
| N | 2.796631  | -5.040683 | -0.064406 |
| N | 5.478268  | 1.069289  | -1.714435 |
| N | 3.899757  | 3.436689  | -1.204202 |
| N | -0.192167 | 5.227004  | 0.321688  |
| N | -2.863388 | 5.024158  | -0.756939 |
| N | -5.438870 | -0.794429 | 2.235166  |
| N | -3.808988 | -3.206066 | 1.930654  |
| N | -0.281510 | -2.479699 | -0.814091 |
| C | -3.115480 | 1.213011  | 0.271777  |
| O | -2.546735 | 1.094618  | 1.387973  |
| C | 1.113971  | 2.057052  | 2.744888  |
| C | -1.297991 | -2.344408 | 0.088304  |
| O | -1.085096 | -2.567774 | 1.316152  |
| C | 3.299878  | -2.638556 | 1.555812  |
| C | 4.393630  | -1.932485 | 1.965751  |
| H | 2.983073  | -3.532648 | 2.091004  |
| H | 4.994419  | -2.248902 | 2.810823  |
| N | 2.567183  | -2.298564 | 0.475236  |
| N | 3.893413  | -0.351421 | 0.258048  |
| C | 2.868251  | -1.141810 | -0.188388 |
| O | 2.223806  | -0.795964 | -1.213688 |
| C | 1.164346  | 2.349550  | 0.009003  |
| O | 1.189597  | 2.506525  | -1.246602 |
| N | 2.309139  | 1.990728  | 0.674604  |
| N | 0.010613  | 2.559744  | 0.702350  |
| H | 1.100314  | 1.950391  | 3.823556  |
| C | -4.820151 | 0.482909  | -1.201927 |
| C | -0.478437 | -2.219040 | -2.127329 |
| C | 4.712674  | -0.771130 | 1.242740  |
| C | -0.000499 | 2.397334  | 2.039083  |
| N | -5.825693 | -0.356472 | -1.424276 |
| N | 0.576593  | -2.293100 | -2.930977 |
| N | 5.791446  | -0.043939 | 1.520322  |
| H | 1.493832  | -2.187227 | -2.513187 |
| H | 0.467075  | -2.099121 | -3.913007 |
| H | 6.417751  | -0.326534 | 2.255505  |
| H | 6.055155  | 0.745405  | 0.949993  |
| H | -6.045469 | -1.083595 | -0.760897 |
| H | -6.374234 | -0.286021 | -2.264415 |
| C | 2.310775  | 1.892069  | 2.023130  |

|   |           |          |          |
|---|-----------|----------|----------|
| H | -0.952995 | 2.569183 | 2.532208 |
| N | 3.454560  | 1.660005 | 2.650893 |
| H | 3.470522  | 1.577310 | 3.653281 |
| H | 4.331766  | 1.605604 | 2.159662 |

**Pd-C-IIc2 (M11L, SMD water)**

|    |           |           |           |
|----|-----------|-----------|-----------|
| Pd | 0.403123  | 3.646446  | 0.771144  |
| Pd | -4.416420 | 0.379606  | -0.089304 |
| Pd | -0.430355 | -3.778499 | -0.646689 |
| Pd | 4.445763  | -0.571356 | -0.159043 |
| C  | -2.683791 | -2.359290 | 2.687835  |
| C  | -1.652119 | 2.290931  | -2.699557 |
| C  | -0.844238 | 2.930015  | -1.807379 |
| H  | -0.059373 | 3.595343  | -2.157107 |
| C  | 3.204464  | 2.796846  | -2.346094 |
| C  | 2.151003  | -2.827747 | 2.601190  |
| C  | 3.651894  | 1.578505  | -1.928370 |
| H  | 4.283110  | 0.972271  | -2.577231 |
| H  | 3.486335  | 3.214642  | -3.305480 |
| H  | 2.231873  | -3.096912 | 3.647819  |
| H  | -1.521679 | 2.402251  | -3.769855 |
| N  | 2.942374  | -1.614433 | 0.706768  |
| N  | 1.094542  | -3.067969 | 0.481260  |
| N  | 3.369458  | 1.058527  | -0.715294 |
| N  | 1.939314  | 2.903961  | -0.332660 |
| N  | -0.964156 | 2.792707  | -0.472186 |
| N  | -2.819123 | 1.369513  | -0.838539 |
| N  | -1.816944 | -2.876916 | 0.530757  |
| N  | -3.285156 | -1.040844 | 0.795233  |
| H  | -2.764084 | -2.576924 | 3.746587  |
| C  | 2.364203  | 3.499333  | -1.465110 |
| C  | -2.650476 | 1.453580  | -2.175724 |
| C  | -1.946282 | -3.137800 | 1.844284  |
| C  | 1.230918  | -3.404348 | 1.776255  |
| C  | -1.980989 | 2.020111  | 0.023443  |
| O  | -2.159277 | 1.915861  | 1.270972  |
| C  | 2.489551  | 1.721633  | 0.098287  |
| O  | 2.177618  | 1.280197  | 1.235050  |
| C  | 1.982357  | -2.186769 | -0.075022 |
| O  | 1.927082  | -1.920271 | -1.310038 |
| C  | -2.549641 | -1.858112 | -0.016729 |
| O  | -2.565747 | -1.684439 | -1.266456 |
| N  | 1.801670  | 4.466579  | 2.000199  |
| H  | 1.442590  | 4.682761  | 2.928002  |
| H  | 2.566472  | 3.801860  | 2.101379  |
| N  | -1.121089 | 4.455826  | 1.846459  |
| H  | -0.843174 | 4.770027  | 2.772910  |
| H  | -1.521791 | 5.245957  | 1.346714  |
| N  | -5.637145 | 1.770511  | -0.947710 |
| H  | -6.223394 | 1.338171  | -1.659456 |
| H  | -6.245330 | 2.178932  | -0.239714 |
| N  | -6.090521 | -0.575657 | 0.575897  |
| H  | -6.622331 | 0.023140  | 1.205578  |
| H  | -6.684347 | -0.808592 | -0.218867 |
| N  | -1.956673 | -4.464693 | -1.801286 |
| H  | -2.545661 | -3.648053 | -1.968324 |
| H  | -1.650994 | -4.844895 | -2.693908 |
| N  | 0.982709  | -4.623224 | -1.841807 |
| H  | 1.495975  | -5.341485 | -1.336124 |
| H  | 0.612672  | -5.034264 | -2.695927 |

|   |           |           |           |
|---|-----------|-----------|-----------|
| N | 6.127190  | 0.352249  | -0.867011 |
| H | 6.053952  | 1.366848  | -0.819754 |
| H | 6.935656  | 0.076000  | -0.311008 |
| N | 5.625365  | -2.173264 | 0.277915  |
| H | 5.063010  | -2.985659 | 0.525824  |
| H | 6.196299  | -2.420099 | -0.529524 |
| H | -5.112131 | 2.525091  | -1.385992 |
| H | 2.172434  | 5.322480  | 1.591496  |
| H | -1.817409 | 3.712413  | 1.932702  |
| H | 6.308175  | 0.087960  | -1.834621 |
| H | 6.247043  | -1.964070 | 1.057246  |
| H | -2.493804 | -5.177720 | -1.313921 |
| H | 1.617602  | -3.859728 | -2.079969 |
| H | -5.874166 | -1.440648 | 1.067554  |
| C | 3.003762  | -1.866017 | 2.032748  |
| H | 0.575344  | -4.188335 | 2.145265  |
| C | -3.323651 | -1.238513 | 2.130404  |
| H | -1.439005 | -4.024628 | 2.214434  |
| N | -3.464855 | 0.757160  | -2.959670 |
| N | 1.948377  | 4.735904  | -1.718414 |
| N | 3.910427  | -1.218783 | 2.756821  |
| N | -4.001778 | -0.375128 | 2.878199  |
| H | 1.366424  | 5.228067  | -1.056387 |
| H | 2.223680  | 5.205239  | -2.564587 |
| H | -4.045834 | 0.030636  | -2.570178 |
| H | -3.357902 | 0.799072  | -3.959347 |
| H | -4.051815 | -0.502722 | 3.874791  |
| H | -4.367287 | 0.479223  | 2.485781  |
| H | 4.465607  | -0.477999 | 2.355631  |
| H | 3.993023  | -1.399782 | 3.743134  |

**Pd-C-IIIc1 (M11L, SMD water)**

|    |           |           |           |
|----|-----------|-----------|-----------|
| Pd | -1.640696 | -3.666005 | -0.957480 |
| Pd | -3.979655 | 1.532500  | 0.010051  |
| Pd | 1.479375  | 3.552802  | 0.649663  |
| Pd | 3.822520  | -1.814339 | 0.137001  |
| C  | -1.089120 | 2.732955  | -2.739388 |
| H  | -1.061262 | 2.843533  | -3.817227 |
| N  | -0.070411 | 3.066915  | -0.597624 |
| C  | 4.145914  | 1.665225  | -2.150765 |
| H  | 4.716879  | 1.926669  | -3.034787 |
| N  | 3.351519  | 0.021254  | -0.611859 |
| N  | 2.753881  | 2.297422  | -0.326700 |
| H  | 4.945048  | -3.556652 | 1.673721  |
| H  | 3.662497  | -4.270958 | 0.916178  |
| H  | 5.081172  | -4.056529 | 0.106198  |
| H  | 6.388692  | -1.845559 | 0.375051  |
| H  | 6.018966  | -1.801131 | -1.230073 |
| H  | 5.975149  | -0.417890 | -0.326834 |
| H  | 2.687041  | 4.540934  | 2.747665  |
| H  | 3.337758  | 3.084158  | 2.328972  |
| H  | 3.751417  | 4.445442  | 1.494626  |
| H  | -0.120660 | 5.534210  | 0.993102  |
| H  | -0.611156 | 4.198234  | 1.854939  |
| H  | 0.564124  | 5.209986  | 2.459097  |
| H  | 0.427976  | -4.273882 | -2.218942 |
| H  | -0.296986 | -5.706546 | -1.772294 |
| H  | -0.828966 | -4.900643 | -3.111885 |
| H  | -2.971722 | -4.084138 | -3.164311 |
| H  | -3.947334 | -4.383800 | -1.865472 |

|   |           |           |           |
|---|-----------|-----------|-----------|
| H | -3.579826 | -2.817340 | -2.283780 |
| H | -6.132497 | 1.766841  | 1.418960  |
| H | -6.535745 | 1.309500  | -0.113885 |
| H | -5.989814 | 0.188909  | 0.961295  |
| H | -5.418630 | 3.695827  | -0.200587 |
| H | -3.849778 | 4.028672  | -0.582355 |
| H | -4.825890 | 3.278820  | -1.681217 |
| N | -4.597457 | 3.345499  | -0.690397 |
| N | -5.878593 | 1.151142  | 0.648472  |
| N | -3.221562 | -3.771370 | -2.229111 |
| N | -0.455588 | -4.785144 | -2.172665 |
| N | 4.449359  | -3.637833 | 0.787402  |
| N | 5.776553  | -1.417009 | -0.317871 |
| N | 2.983085  | 3.965974  | 1.961237  |
| N | 0.186517  | 4.789091  | 1.613547  |
| N | -2.182408 | 2.012332  | -0.760817 |
| C | 0.709297  | -3.334910 | 2.559631  |
| C | -3.517935 | -1.936165 | 2.438287  |
| H | -3.751195 | -2.223712 | 3.457131  |
| N | -3.425001 | -0.277593 | 0.725174  |
| N | -2.777072 | -2.500601 | 0.249047  |
| N | -0.069178 | -3.457470 | 0.311097  |
| N | 1.989509  | -2.397010 | 0.780628  |
| H | 0.588821  | -3.569972 | 3.610733  |
| C | 3.997356  | 0.372955  | -1.744859 |
| C | -3.099076 | -2.843392 | 1.508937  |
| C | -0.180120 | -3.760881 | 1.617877  |
| C | -2.122709 | 2.120336  | -2.101496 |
| H | -1.023682 | -4.385394 | 1.899806  |
| H | -3.016425 | -3.898521 | 1.759442  |
| H | -2.965287 | 1.705725  | -2.652800 |
| H | 4.429914  | -0.442096 | -2.323416 |
| C | -3.027777 | -1.224861 | -0.176973 |
| O | -2.906138 | -0.932003 | -1.398410 |
| C | -1.145446 | 2.455182  | 0.001799  |
| O | -1.171806 | 2.318548  | 1.259314  |
| C | 2.678869  | 0.988798  | 0.086416  |
| O | 1.994938  | 0.710057  | 1.105896  |
| C | 1.054415  | -2.807178 | -0.124296 |
| O | 1.238200  | -2.599322 | -1.358559 |
| C | 3.571339  | 2.658457  | -1.336498 |
| C | -0.067730 | 3.272569  | -1.934308 |
| N | 3.810828  | 3.949264  | -1.544901 |
| N | 0.895754  | 4.002695  | -2.474161 |
| H | 4.406842  | 4.237359  | -2.302639 |
| H | 3.486868  | 4.654530  | -0.900023 |
| H | 0.916714  | 4.154892  | -3.468444 |
| H | 1.603426  | 4.446842  | -1.914833 |
| C | 1.805218  | -2.581715 | 2.106060  |
| C | -3.598889 | -0.594060 | 2.028118  |
| N | 2.706794  | -2.080155 | 2.941543  |
| N | -3.872773 | 0.385415  | 2.881950  |
| H | -3.845483 | 1.351730  | 2.594022  |
| H | -4.021090 | 0.181357  | 3.856034  |
| H | 3.445877  | -1.481747 | 2.605062  |
| H | 2.607712  | -2.213558 | 3.933847  |

**Pd-C-IIIc2 (M11L, SMD water)**

|    |           |          |           |
|----|-----------|----------|-----------|
| Pd | 0.068276  | 3.758243 | -0.760426 |
| Pd | -4.418435 | 0.077311 | 0.003160  |

|    |           |           |           |
|----|-----------|-----------|-----------|
| Pd | -0.074215 | -3.736820 | 0.770489  |
| Pd | 4.513440  | -0.073874 | -0.010964 |
| C  | 3.527132  | 1.904940  | 1.842465  |
| C  | 2.865408  | -3.172685 | -2.295863 |
| H  | 4.247250  | 1.355831  | 2.448002  |
| C  | 2.987268  | 3.072308  | 2.296408  |
| C  | -1.226343 | -2.873315 | -1.804453 |
| C  | -1.846886 | 2.174524  | 2.692495  |
| H  | -0.488300 | -3.588732 | -2.157626 |
| C  | -1.979881 | -2.169158 | -2.695949 |
| H  | -1.708899 | 2.264164  | 3.763960  |
| H  | -1.853681 | -2.286719 | -3.766163 |
| H  | 3.267932  | 3.502649  | 3.250647  |
| N  | -3.064391 | -1.158962 | -0.836997 |
| N  | -1.348097 | -2.745509 | -0.467916 |
| N  | -2.959580 | 1.215598  | 0.819863  |
| N  | -1.227010 | 2.790252  | 0.472857  |
| N  | 1.652107  | 3.098927  | 0.325184  |
| N  | 3.241515  | 1.375671  | 0.634108  |
| N  | 1.532425  | -3.140283 | -0.322461 |
| N  | 3.185355  | -1.479304 | -0.642744 |
| H  | 3.129516  | -3.618113 | -3.247789 |
| C  | -1.098462 | 2.895902  | 1.810387  |
| C  | 2.063803  | 3.713853  | 1.452475  |
| C  | 3.449061  | -2.024190 | -1.849081 |
| C  | -2.911954 | -1.256865 | -2.173193 |
| C  | 2.267097  | 1.958239  | -0.127057 |
| O  | 1.929559  | 1.476830  | -1.242390 |
| C  | -2.192993 | 1.960402  | -0.031082 |
| O  | -2.392492 | 1.884816  | -1.276944 |
| C  | -2.302767 | -1.896534 | 0.024240  |
| O  | -2.500533 | -1.791257 | 1.267821  |
| C  | 2.192135  | -2.021591 | 0.123895  |
| O  | 1.877012  | -1.523529 | 1.238337  |
| N  | 1.404249  | 4.703612  | -1.967726 |
| H  | 2.084085  | 4.019309  | -2.294456 |
| H  | 0.978447  | 5.143239  | -2.781003 |
| N  | -1.493869 | 4.474547  | -1.846691 |
| H  | -1.934426 | 5.255630  | -1.366134 |
| H  | -1.228362 | 4.780637  | -2.779654 |
| N  | 6.030618  | 1.214629  | 0.439397  |
| H  | 6.429679  | 0.994415  | 1.350811  |
| H  | 6.770615  | 1.134747  | -0.256752 |
| N  | 5.978709  | -1.416059 | -0.477441 |
| H  | 6.378814  | -1.207035 | -1.391135 |
| H  | 6.726994  | -1.367162 | 0.212599  |
| N  | -1.652176 | -4.391798 | 1.871880  |
| H  | -2.114065 | -5.168734 | 1.404596  |
| H  | -1.390524 | -4.690447 | 2.808364  |
| N  | 1.234408  | -4.719548 | 1.976887  |
| H  | 1.928568  | -4.053393 | 2.311130  |
| H  | 0.795464  | -5.156249 | 2.784783  |
| N  | -5.825716 | 1.300846  | 0.825584  |
| H  | -6.347049 | 0.807827  | 1.548644  |
| H  | -5.399562 | 2.123956  | 1.246559  |
| N  | -5.922928 | -1.058482 | -0.772452 |
| H  | -6.436033 | -0.548817 | -1.489672 |
| H  | -5.556907 | -1.913071 | -1.187589 |
| H  | -6.484538 | 1.616341  | 0.115737  |
| H  | 1.714932  | -5.443302 | 1.445816  |

|   |           |           |           |
|---|-----------|-----------|-----------|
| H | 5.632970  | -2.373587 | -0.492264 |
| H | 5.721234  | 2.184700  | 0.452711  |
| H | 1.899033  | 5.420776  | -1.440878 |
| H | -2.151239 | 3.695916  | -1.919696 |
| H | -6.576309 | -1.319940 | -0.036371 |
| H | -2.289174 | -3.595558 | 1.935237  |
| C | -2.780579 | 1.271946  | 2.156617  |
| H | -0.355419 | 3.602407  | 2.171684  |
| H | 4.187358  | -1.504874 | -2.458979 |
| C | 1.919811  | -3.774965 | -1.447771 |
| N | 1.558843  | 4.909676  | 1.739434  |
| N | -3.521821 | 0.480866  | 2.922872  |
| N | 1.372456  | -4.952530 | -1.731707 |
| N | -3.671450 | -0.499595 | -2.955445 |
| H | -4.000019 | -0.306325 | 2.510151  |
| H | -3.401914 | 0.495284  | 3.922002  |
| H | 0.921972  | 5.366499  | 1.103415  |
| H | 1.827158  | 5.388903  | 2.582316  |
| H | 1.623173  | -5.442065 | -2.574135 |
| H | 0.719450  | -5.386503 | -1.096456 |
| H | -3.570123 | -0.547952 | -3.955284 |
| H | -4.220102 | 0.252117  | -2.568242 |

**Pd-C-IVc1 (M11L, SMD water)**

|    |           |           |           |
|----|-----------|-----------|-----------|
| Pd | 4.047519  | 1.350146  | -0.743146 |
| Pd | 1.230825  | -3.752714 | -0.165821 |
| Pd | -4.047529 | -1.350109 | 0.743156  |
| Pd | -1.230828 | 3.752730  | 0.165837  |
| C  | 3.398985  | -2.716533 | 1.488567  |
| C  | -1.482793 | -1.899205 | -2.671478 |
| H  | 3.079203  | -3.571854 | 2.082479  |
| C  | 4.544671  | -2.048465 | 1.807781  |
| C  | 1.482700  | 1.898996  | 2.671492  |
| C  | -4.544608 | 2.048500  | -1.807876 |
| C  | 0.331411  | 2.271230  | 2.046751  |
| C  | -3.398966 | 2.716594  | -1.488570 |
| H  | -3.079171 | 3.571948  | -2.082427 |
| H  | -0.591957 | 2.416772  | 2.601615  |
| H  | 1.530410  | 1.741791  | 3.742949  |
| H  | -5.180100 | 2.363416  | -2.627636 |
| H  | 5.180193  | -2.363385 | 2.627517  |
| N  | -2.614907 | 2.388618  | -0.440176 |
| N  | -4.013032 | 0.509718  | -0.074273 |
| N  | 0.268216  | 2.506654  | 0.721660  |
| N  | 2.548863  | 1.901865  | 0.530265  |
| N  | 4.013027  | -0.509728 | 0.074166  |
| N  | 2.614860  | -2.388556 | 0.440229  |
| N  | -2.548931 | -1.902012 | -0.530232 |
| N  | -0.268249 | -2.506679 | -0.721632 |
| C  | -0.331472 | -2.271334 | -2.046739 |
| H  | 0.591898  | -2.416849 | -2.601606 |
| H  | -1.530522 | -1.742056 | -3.742944 |
| C  | 2.635118  | 1.770393  | 1.872871  |
| C  | 4.872320  | -0.931218 | 1.022350  |
| C  | -2.635208 | -1.770588 | -1.872851 |
| C  | -4.872287 | 0.931241  | -1.022470 |
| C  | 2.920891  | -1.263922 | -0.280382 |
| O  | 2.224866  | -0.906632 | -1.264767 |
| C  | -1.370508 | -2.300636 | 0.051523  |
| O  | -1.319900 | -2.493254 | 1.301484  |

|   |           |           |           |
|---|-----------|-----------|-----------|
| C | -2.920928 | 1.263941  | 0.280355  |
| O | -2.224933 | 0.906614  | 1.264747  |
| C | 1.370468  | 2.300589  | -0.051505 |
| O | 1.319904  | 2.493306  | -1.301441 |
| H | 5.689337  | -0.209125 | -1.974328 |
| H | 5.177430  | 0.962952  | -3.014059 |
| H | 6.358232  | 1.300362  | -1.911573 |
| H | 4.434039  | 3.895733  | -0.874611 |
| H | 4.563338  | 3.295322  | -2.407361 |
| H | 3.062444  | 3.428571  | -1.700706 |
| H | 2.528672  | -5.934887 | -0.578333 |
| H | 3.581740  | -4.854648 | 0.072310  |
| H | 2.505821  | -5.645234 | 1.045015  |
| H | -1.004408 | -5.018838 | -0.340678 |
| H | -0.169562 | -5.203039 | -1.750768 |
| H | 0.200122  | -6.137123 | -0.441475 |
| H | -4.563304 | -3.295248 | 2.407477  |
| H | -4.434032 | -3.895664 | 0.874724  |
| H | -3.062418 | -3.428457 | 1.700772  |
| H | -5.176956 | -0.962241 | 3.014201  |
| H | -5.689456 | 0.209262  | 1.974136  |
| H | -6.357914 | -1.300441 | 1.912103  |
| H | 1.004338  | 5.018979  | 0.339933  |
| H | -0.200197 | 6.137154  | 0.441788  |
| H | 0.170283  | 5.202658  | 1.750563  |
| N | 5.492460  | 0.785789  | -2.061634 |
| N | 4.048767  | 3.222524  | -1.532604 |
| N | 2.629586  | -5.210341 | 0.131258  |
| N | -0.083963 | -5.204081 | -0.735416 |
| N | -4.048755 | -3.222449 | 1.532707  |
| N | -5.492255 | -0.785563 | 2.061780  |
| N | 0.084105  | 5.204028  | 0.735260  |
| N | -2.629569 | 5.210380  | -0.131197 |
| H | -2.505798 | 5.645328  | -1.044929 |
| H | -3.581743 | 4.854736  | -0.072268 |
| H | -2.528619 | 5.934880  | 0.578438  |
| N | 5.999744  | -0.249367 | 1.210111  |
| N | 3.818960  | 1.541306  | 2.421273  |
| N | -5.999711 | 0.249398  | -1.210314 |
| N | -3.819052 | -1.541609 | -2.421275 |
| H | -6.652343 | 0.538305  | -1.919366 |
| H | -6.264742 | -0.509382 | -0.601565 |
| H | -3.898791 | -1.419605 | -3.416664 |
| H | -4.662204 | -1.506861 | -1.871727 |
| H | 6.264646  | 0.509524  | 0.601446  |
| H | 6.652424  | -0.538256 | 1.919126  |
| H | 4.662107  | 1.506785  | 1.871701  |
| H | 3.898728  | 1.419330  | 3.416661  |

**Pd-C-IVc2 (M11L, SMD water)**

|    |           |           |           |
|----|-----------|-----------|-----------|
| Pd | -0.015754 | -3.802447 | -0.640399 |
| Pd | -4.408195 | 0.000949  | -0.000758 |
| Pd | -0.013736 | 3.802092  | 0.641570  |
| Pd | 4.403101  | -0.001024 | -0.000376 |
| C  | -2.299483 | 2.505796  | -2.713563 |
| C  | -2.302668 | -2.504675 | 2.713728  |
| C  | 2.401797  | -2.643042 | 2.649077  |
| C  | 2.404056  | 2.643951  | -2.648380 |
| H  | 2.494567  | -2.911623 | 3.694876  |
| H  | 2.497415  | 2.913373  | -3.693904 |

|   |           |           |           |
|---|-----------|-----------|-----------|
| H | -2.343409 | -2.716856 | 3.775841  |
| N | 3.052193  | 1.285262  | -0.794480 |
| N | 1.462476  | 3.008720  | -0.494459 |
| N | 3.051851  | -1.286601 | 0.794198  |
| N | 1.460703  | -3.008865 | 0.495126  |
| N | -1.441717 | -2.973763 | 0.544250  |
| N | -3.050741 | -1.260429 | 0.820431  |
| N | -1.439919 | 2.974249  | -0.543390 |
| N | -3.049653 | 1.261869  | -0.820902 |
| H | -2.339282 | 2.718071  | -3.775698 |
| C | 1.615252  | -3.349025 | 1.787295  |
| C | -1.529089 | -3.235174 | 1.860954  |
| C | -1.526190 | 3.235831  | -1.860136 |
| C | 1.617846  | 3.349901  | -1.786270 |
| C | -2.251681 | -2.011054 | 0.002823  |
| O | -2.275579 | -1.828831 | -1.246719 |
| C | -2.250821 | 2.011996  | -0.002620 |
| O | -2.275931 | 1.829796  | 1.246913  |
| C | 2.235177  | 2.007764  | 0.029790  |
| O | 2.207730  | 1.771037  | 1.269922  |
| C | 2.234425  | -2.009005 | -0.029718 |
| O | 2.207626  | -1.773239 | -1.270050 |
| H | -2.125252 | -3.784980 | -1.979343 |
| H | -1.199948 | -5.000186 | -2.641887 |
| H | -2.036942 | -5.275762 | -1.247728 |
| H | 1.955289  | -5.287952 | -1.386392 |
| H | 1.097601  | -4.895775 | -2.743103 |
| H | 2.064368  | -3.753663 | -2.019449 |
| H | -6.506841 | -1.467173 | -0.057118 |
| H | -5.509202 | -2.074052 | 1.105301  |
| H | -6.429652 | -0.742021 | 1.424667  |
| H | -5.507666 | 2.076230  | -1.107973 |
| H | -6.428346 | 0.744399  | -1.427552 |
| H | -6.506222 | 1.470002  | 0.053972  |
| H | -1.197391 | 4.998882  | 2.643769  |
| H | -2.034067 | 5.276195  | 1.249720  |
| H | -2.123468 | 3.784820  | 1.980120  |
| H | 1.100313  | 4.894150  | 2.744640  |
| H | 2.066825  | 3.752516  | 2.020116  |
| H | 1.957525  | 5.287102  | 1.387855  |
| H | 5.514193  | -2.103568 | 1.055263  |
| H | 6.501962  | -1.465984 | -0.097862 |
| H | 6.430816  | -0.775935 | 1.401062  |
| N | -1.515656 | -4.577469 | -1.772366 |
| N | 1.440117  | -4.543995 | -1.851509 |
| N | -5.882492 | -1.214385 | 0.707173  |
| N | -5.881473 | 1.216790  | -0.709846 |
| N | -1.513355 | 4.577106  | 1.773873  |
| N | 1.442506  | 4.542892  | 1.852720  |
| N | 5.880933  | -1.232774 | 0.675557  |
| N | 5.881417  | 1.229968  | -0.676744 |
| H | 6.430198  | 0.773061  | -1.403050 |
| H | 5.515091  | 2.101330  | -1.055567 |
| H | 6.503416  | 1.462198  | 0.096196  |
| C | 3.084507  | -1.532074 | 2.124253  |
| C | -3.041384 | -1.445567 | 2.159769  |
| H | -0.954189 | -4.081553 | 2.227004  |
| H | 1.079820  | -4.234810 | 2.120649  |
| H | 1.083256  | 4.236403  | -2.119075 |
| C | 3.085512  | 1.531855  | -2.124306 |

|   |           |           |           |
|---|-----------|-----------|-----------|
| H | -0.950640 | 4.081980  | -2.225678 |
| C | -3.039137 | 1.447014  | -2.160228 |
| N | 3.804967  | -0.727881 | 2.896830  |
| N | -3.769027 | -0.633731 | 2.917645  |
| N | -3.766614 | 0.635549  | -2.918657 |
| N | 3.805411  | 0.727572  | -2.897304 |
| H | 4.212216  | 0.119321  | 2.530393  |
| H | 3.862412  | -0.897434 | 3.886890  |
| H | 3.863255  | 0.897753  | -3.887231 |
| H | 4.211739  | -0.120320 | -2.531396 |
| H | -4.213636 | 0.183596  | 2.528941  |
| H | -3.789686 | -0.760684 | 3.915523  |
| H | -4.211875 | -0.181592 | -2.530313 |
| H | -3.786702 | 0.762651  | -3.916532 |

**Pd-C-Id (M11L, SMD water)**

|    |           |           |           |
|----|-----------|-----------|-----------|
| Pd | -1.825388 | 3.576669  | -0.359404 |
| Pd | 3.576669  | 1.825388  | 0.359404  |
| Pd | -3.576669 | -1.825388 | 0.359404  |
| Pd | 1.825388  | -3.576669 | -0.359404 |
| C  | -0.117499 | -1.681918 | 2.905096  |
| C  | 0.784020  | -2.325277 | 2.105645  |
| H  | 0.159590  | -1.287640 | 3.876143  |
| H  | 1.818232  | -2.462327 | 2.413566  |
| N  | 0.452959  | -2.826290 | 0.902812  |
| N  | -1.750037 | -2.037763 | 1.201906  |
| C  | 0.117499  | 1.681918  | 2.905096  |
| C  | -0.784020 | 2.325277  | 2.105645  |
| H  | -0.159590 | 1.287640  | 3.876143  |
| H  | -1.818232 | 2.462327  | 2.413566  |
| N  | -0.452959 | 2.826290  | 0.902812  |
| N  | 1.750037  | 2.037763  | 1.201906  |
| C  | -1.681918 | 0.117499  | -2.905096 |
| C  | 1.681918  | -0.117499 | -2.905096 |
| N  | 2.826290  | 0.452959  | -0.902812 |
| N  | 2.037763  | -1.750037 | -1.201906 |
| C  | 2.325277  | 0.784020  | -2.105645 |
| H  | 1.287640  | 0.159590  | -3.876143 |
| H  | 2.462327  | 1.818232  | -2.413566 |
| H  | -1.287640 | -0.159590 | -3.876143 |
| C  | -2.325277 | -0.784020 | -2.105645 |
| N  | -2.826290 | -0.452959 | -0.902812 |
| N  | -2.037763 | 1.750037  | -1.201906 |
| H  | -2.462327 | -1.818232 | -2.413566 |
| C  | 1.417439  | 1.504280  | 2.396269  |
| C  | 1.504280  | -1.417439 | -2.396269 |
| C  | -1.417439 | -1.504280 | 2.396269  |
| C  | -1.504280 | 1.417439  | -2.396269 |
| C  | 0.834668  | 2.730604  | 0.460582  |
| O  | 1.185416  | 3.281522  | -0.619912 |
| C  | 2.730604  | -0.834668 | -0.460582 |
| O  | 3.281522  | -1.185416 | 0.619912  |
| C  | -0.834668 | -2.730604 | 0.460582  |
| O  | -1.185416 | -3.281522 | -0.619912 |
| C  | -2.730604 | 0.834668  | -0.460582 |
| O  | -3.281522 | 1.185416  | 0.619912  |
| N  | -5.399861 | -1.587472 | -0.514616 |
| H  | -5.329221 | -1.801828 | -1.507468 |
| H  | -6.121078 | -2.181312 | -0.110542 |
| N  | -4.320959 | -3.228126 | 1.632594  |

|   |           |           |           |
|---|-----------|-----------|-----------|
| H | -4.951317 | -2.807542 | 2.312807  |
| H | -4.835767 | -3.943299 | 1.121716  |
| N | -3.228126 | 4.320959  | -1.632594 |
| H | -3.943299 | 4.835767  | -1.121716 |
| H | -2.807542 | 4.951317  | -2.312807 |
| N | -1.587472 | 5.399861  | 0.514616  |
| H | -2.181312 | 6.121078  | 0.110542  |
| H | -1.801828 | 5.329221  | 1.507468  |
| N | 4.320959  | 3.228126  | 1.632594  |
| H | 4.951317  | 2.807542  | 2.312807  |
| H | 4.835767  | 3.943299  | 1.121716  |
| N | 5.399861  | 1.587472  | -0.514616 |
| H | 5.329221  | 1.801828  | -1.507468 |
| H | 6.121078  | 2.181312  | -0.110542 |
| N | 1.587472  | -5.399861 | 0.514616  |
| H | 0.617327  | -5.692319 | 0.419828  |
| H | 2.181312  | -6.121078 | 0.110542  |
| N | 3.228126  | -4.320959 | -1.632594 |
| H | 3.683446  | -3.561757 | -2.136038 |
| H | 3.943299  | -4.835767 | -1.121716 |
| H | 3.561757  | 3.683446  | 2.136038  |
| H | 5.692319  | 0.617327  | -0.419828 |
| H | 1.801828  | -5.329221 | 1.507468  |
| H | 2.807542  | -4.951317 | -2.312807 |
| H | -3.561757 | -3.683446 | 2.136038  |
| H | -5.692319 | -0.617327 | -0.419828 |
| H | -3.683446 | 3.561757  | -2.136038 |
| H | -0.617327 | 5.692319  | 0.419828  |
| N | -2.351885 | -0.834668 | 3.061578  |
| N | -0.834668 | 2.351885  | -3.061578 |
| N | 2.351885  | 0.834668  | 3.061578  |
| N | 0.834668  | -2.351885 | -3.061578 |
| H | 3.234409  | 0.623313  | 2.621065  |
| H | 2.128788  | 0.380892  | 3.931076  |
| H | -0.380892 | 2.128788  | -3.931076 |
| H | -0.623313 | 3.234409  | -2.621065 |
| H | -2.128788 | -0.380892 | 3.931076  |
| H | -3.234409 | -0.623313 | 2.621065  |
| H | 0.623313  | -3.234409 | -2.621065 |
| H | 0.380892  | -2.128788 | -3.931076 |

**Pd-C-IIId (M11L, SMD water)**

|    |           |           |           |
|----|-----------|-----------|-----------|
| Pd | -4.535435 | 0.065215  | -0.107408 |
| Pd | -0.038688 | 3.638897  | -0.125626 |
| Pd | 4.375952  | 0.019200  | 0.186414  |
| Pd | -0.100671 | -3.569748 | 0.052335  |
| C  | 1.365650  | -0.864901 | 3.022987  |
| C  | 2.523712  | -0.459226 | 2.423040  |
| H  | 1.069622  | -0.495669 | 3.998585  |
| H  | 3.191825  | 0.252145  | 2.905859  |
| N  | 2.903111  | -0.894172 | 1.206962  |
| N  | 0.940609  | -2.192070 | 1.092125  |
| C  | -1.749310 | 1.152161  | 2.909579  |
| C  | -2.851514 | 0.698040  | 2.240105  |
| H  | -1.567415 | 0.896790  | 3.947944  |
| H  | -3.589966 | 0.066182  | 2.732247  |
| N  | -3.086501 | 0.983761  | 0.946539  |
| N  | -1.093421 | 2.248950  | 0.898034  |
| C  | -1.523802 | -0.858149 | -2.931918 |
| C  | 1.661464  | 1.028946  | -3.008476 |

|   |           |           |           |
|---|-----------|-----------|-----------|
| N | 1.076914  | 2.262536  | -1.066821 |
| N | 2.956729  | 0.833243  | -1.011620 |
| C | 0.846702  | 1.896801  | -2.340508 |
| H | 1.474718  | 0.744971  | -4.038452 |
| H | -0.025541 | 2.339867  | -2.819401 |
| H | -1.223296 | -0.508665 | -3.913394 |
| N | -1.113655 | -2.163888 | -0.980615 |
| N | -3.078396 | -0.870466 | -1.131257 |
| C | -2.695006 | -0.458116 | -2.353112 |
| H | -3.369199 | 0.229798  | -2.858786 |
| C | -0.820717 | 1.916799  | 2.178132  |
| C | 2.739947  | 0.470452  | -2.294079 |
| C | 0.523805  | -1.718550 | 2.286954  |
| C | -0.689167 | -1.704766 | -2.179127 |
| C | -2.301884 | -1.759555 | -0.450168 |
| O | -2.685552 | -2.224988 | 0.664094  |
| C | -2.220636 | 1.798860  | 0.272672  |
| O | -2.465341 | 2.156800  | -0.913344 |
| C | 2.160847  | 1.766046  | -0.407149 |
| O | 2.443239  | 2.173509  | 0.756309  |
| C | 2.133132  | -1.810238 | 0.554738  |
| O | 2.523486  | -2.314987 | -0.537958 |
| N | -5.943594 | -0.917744 | -1.201533 |
| H | -6.899051 | -0.647334 | -0.976801 |
| H | -5.787449 | -0.739434 | -2.192027 |
| N | -5.968720 | 1.032172  | 0.969769  |
| H | -6.773697 | 1.289946  | 0.401581  |
| H | -6.291490 | 0.431172  | 1.725700  |
| N | 0.930884  | -4.995029 | 1.076968  |
| H | 0.854681  | -5.922284 | 0.663584  |
| H | 1.916404  | -4.738900 | 1.101306  |
| N | -1.157352 | -4.967020 | -0.986214 |
| H | -1.096281 | -5.898792 | -0.580543 |
| H | -2.138682 | -4.695400 | -1.009326 |
| N | 5.753697  | -0.829567 | 1.423388  |
| H | 6.669836  | -0.389115 | 1.366306  |
| H | 5.435672  | -0.774223 | 2.389350  |
| N | 5.851785  | 1.000903  | -0.822606 |
| H | 6.444592  | 1.513269  | -0.171974 |
| H | 6.436833  | 0.344463  | -1.336119 |
| N | 1.013031  | 5.046541  | -1.156819 |
| H | 0.859174  | 4.914745  | -2.154997 |
| H | 0.766065  | 6.005687  | -0.920838 |
| N | -1.177065 | 5.040038  | 0.819028  |
| H | -0.894108 | 5.109393  | 1.794897  |
| H | -1.107697 | 5.966334  | 0.402102  |
| H | -5.584806 | 1.881080  | 1.379803  |
| H | -5.850271 | -1.918368 | -1.041362 |
| H | 0.592504  | -5.044605 | 2.035977  |
| H | -0.819130 | -5.014154 | -1.945430 |
| H | 5.859990  | -1.812840 | 1.182952  |
| H | 5.461043  | 1.667875  | -1.485294 |
| H | 2.005479  | 4.918764  | -0.968309 |
| H | -2.154653 | 4.755486  | 0.792423  |
| N | 0.324539  | 2.352594  | 2.693816  |
| N | 0.506331  | -2.096496 | -2.605724 |
| N | 3.567358  | -0.403850 | -2.854047 |
| N | -0.671824 | -2.100004 | 2.723954  |
| H | 1.073015  | 2.626859  | 2.061976  |
| H | 0.577879  | 2.072120  | 3.627358  |

|   |           |           |           |
|---|-----------|-----------|-----------|
| H | -1.023535 | -1.704412 | 3.581337  |
| H | -1.354255 | -2.467754 | 2.064993  |
| H | 0.857394  | -1.735207 | -3.478593 |
| H | 1.181371  | -2.480184 | -1.948026 |
| H | 4.256747  | -0.889026 | -2.302023 |
| H | 3.425167  | -0.697807 | -3.805613 |

**Pd-C-III d (M11L, SMD water)**

|    |           |           |           |
|----|-----------|-----------|-----------|
| Pd | 0.000000  | 3.603500  | 0.156718  |
| Pd | 0.000000  | 0.000000  | -4.291803 |
| Pd | 0.000000  | -3.603500 | 0.156718  |
| Pd | 0.000000  | 0.000000  | 4.587262  |
| C  | 2.923538  | -0.823781 | 1.624918  |
| H  | 3.908367  | -0.460180 | 1.354458  |
| N  | 1.003325  | -2.156191 | 1.152046  |
| N  | 1.075942  | -0.859110 | 3.122342  |
| C  | 3.008077  | 1.056891  | -1.407712 |
| C  | 2.274613  | 1.893192  | -0.616991 |
| H  | 4.021724  | 0.768637  | -1.150913 |
| H  | 2.679095  | 2.301169  | 0.308816  |
| N  | 1.026790  | 2.275566  | -0.940569 |
| N  | 1.106679  | 0.879220  | -2.841112 |
| C  | -2.923538 | 0.823781  | 1.624918  |
| C  | -3.008077 | -1.056891 | -1.407712 |
| N  | -1.106679 | -0.879220 | -2.841112 |
| N  | -1.026790 | -2.275566 | -0.940569 |
| H  | -4.021724 | -0.768637 | -1.150913 |
| H  | -3.908367 | 0.460180  | 1.354458  |
| C  | -2.301028 | 0.426346  | 2.774827  |
| N  | -1.075942 | 0.859110  | 3.122342  |
| N  | -1.003325 | 2.156191  | 1.152046  |
| H  | -2.775386 | -0.271979 | 3.462106  |
| C  | 2.301028  | -0.426346 | 2.774827  |
| C  | -2.274613 | -1.893192 | -0.616991 |
| H  | 2.775386  | 0.271979  | 3.462106  |
| H  | -2.679095 | -2.301169 | 0.308816  |
| C  | 2.376868  | 0.526198  | -2.550394 |
| C  | -2.376868 | -0.526198 | -2.550394 |
| C  | 2.215071  | -1.694632 | 0.774482  |
| C  | -2.215071 | 1.694632  | 0.774482  |
| C  | 0.449849  | 1.805799  | -2.081706 |
| O  | -0.682677 | 2.230032  | -2.448349 |
| C  | -0.425110 | 1.751288  | 2.319775  |
| O  | 0.698612  | 2.218573  | 2.660061  |
| C  | 0.425110  | -1.751288 | 2.319775  |
| O  | -0.698612 | -2.218573 | 2.660061  |
| C  | -0.449849 | -1.805799 | -2.081706 |
| O  | 0.682677  | -2.230032 | -2.448349 |
| N  | 1.033304  | 5.066884  | -0.816263 |
| H  | 0.919624  | 5.991271  | -0.404763 |
| H  | 2.025661  | 4.836971  | -0.806457 |
| N  | -1.051787 | 4.936485  | 1.281553  |
| H  | -0.859047 | 5.911354  | 1.061081  |
| H  | -2.047406 | 4.771726  | 1.144448  |
| N  | 1.083424  | 0.922593  | -5.748302 |
| H  | 1.599663  | 0.245374  | -6.307124 |
| H  | 0.455815  | 1.432873  | -6.367488 |
| N  | -1.083424 | -0.922593 | -5.748302 |
| H  | -1.599663 | -0.245374 | -6.307124 |
| H  | -0.455815 | -1.432873 | -6.367488 |

|   |           |           |           |
|---|-----------|-----------|-----------|
| N | 1.135129  | -0.923962 | 6.006569  |
| H | 2.109178  | -0.941059 | 5.709270  |
| H | 1.088821  | -0.464832 | 6.914108  |
| N | -1.135129 | 0.923962  | 6.006569  |
| H | -2.109178 | 0.941059  | 5.709270  |
| H | -1.088821 | 0.464832  | 6.914108  |
| N | 1.051787  | -4.936485 | 1.281553  |
| H | 0.859047  | -5.911354 | 1.061081  |
| H | 2.047406  | -4.771726 | 1.144448  |
| N | -1.033304 | -5.066884 | -0.816263 |
| H | -0.919624 | -5.991271 | -0.404763 |
| H | -2.025661 | -4.836971 | -0.806457 |
| H | -0.823098 | 1.886149  | 6.120030  |
| H | 0.823098  | -1.886149 | 6.120030  |
| H | 0.727645  | 5.108657  | -1.786737 |
| H | -0.838263 | 4.784915  | 2.265744  |
| H | -1.748087 | -1.586395 | -5.355289 |
| H | 1.748087  | 1.586395  | -5.355289 |
| H | -0.727645 | -5.108657 | -1.786737 |
| H | 0.838263  | -4.784915 | 2.265744  |
| N | -2.696256 | 2.107589  | -0.393464 |
| N | -3.006755 | 0.310666  | -3.366950 |
| N | 3.006755  | -0.310666 | -3.366950 |
| N | 2.696256  | -2.107589 | -0.393464 |
| H | 3.579050  | -1.744052 | -0.715895 |
| H | 2.058072  | -2.484852 | -1.089808 |
| H | -2.058072 | 2.484852  | -1.089808 |
| H | -3.579050 | 1.744052  | -0.715895 |
| H | 3.944707  | -0.608609 | -3.157294 |
| H | 2.514682  | -0.779946 | -4.110683 |
| H | -2.514682 | 0.779946  | -4.110683 |
| H | -3.944707 | 0.608609  | -3.157294 |

**Pd-C-IV d (M11L, SMD water)**

|    |           |           |           |
|----|-----------|-----------|-----------|
| Pd | 0.000206  | 3.646915  | 0.000257  |
| Pd | -4.442351 | 0.000173  | -0.000014 |
| Pd | -0.000154 | -3.646937 | -0.000317 |
| Pd | 4.442269  | -0.000145 | 0.000126  |
| C  | -1.544200 | 0.964889  | 2.947867  |
| C  | -2.664006 | 0.520896  | 2.302671  |
| H  | -1.290891 | 0.627873  | 3.946835  |
| H  | -3.343196 | -0.187787 | 2.773966  |
| N  | -2.990584 | 0.912900  | 1.057195  |
| N  | -1.049152 | 2.249991  | 1.004858  |
| C  | 1.544088  | -0.965427 | 2.947850  |
| C  | 2.663872  | -0.521229 | 2.302747  |
| H  | 1.290752  | -0.628623 | 3.946883  |
| H  | 3.342998  | 0.187428  | 2.774174  |
| N  | 2.990503  | -0.912993 | 1.057218  |
| N  | 1.049166  | -2.250204 | 1.004595  |
| C  | 2.205931  | -1.828542 | 0.418763  |
| O  | 2.551456  | -2.298300 | -0.705122 |
| C  | 1.544404  | 0.965309  | -2.947902 |
| C  | -2.205879 | 1.828424  | 0.418881  |
| O  | -2.551362 | 2.298452  | -0.704905 |
| C  | -1.544224 | -0.964670 | -2.947909 |
| C  | -2.206118 | -1.828342 | -0.419021 |
| O  | -2.551652 | -2.298332 | 0.704763  |
| H  | 1.710439  | -4.692692 | 1.623602  |
| H  | 0.405603  | -5.698028 | 1.505269  |

|   |           |           |           |
|---|-----------|-----------|-----------|
| H | 1.542866  | -5.675397 | 0.308102  |
| H | -0.406141 | -5.697740 | -1.506203 |
| H | -1.543567 | -5.675029 | -0.309189 |
| H | -1.710763 | -4.692130 | -1.624592 |
| H | -5.493244 | -1.383764 | -1.900969 |
| H | -6.307098 | -1.692096 | -0.499999 |
| H | -6.626034 | -0.316250 | -1.352881 |
| H | -6.625877 | 0.316821  | 1.353031  |
| H | -5.492888 | 1.384165  | 1.901090  |
| H | -6.306830 | 1.692687  | 0.500205  |
| N | 1.036498  | -5.098403 | 0.976796  |
| N | -1.036989 | -5.098052 | -0.977742 |
| N | -5.888583 | -0.956412 | -1.065662 |
| N | -5.888378 | 0.956917  | 1.065800  |
| N | -1.049359 | -2.249905 | -1.004939 |
| N | -2.990742 | -0.912737 | -1.057334 |
| C | -2.664053 | -0.520667 | -2.302761 |
| H | -3.343198 | 0.188051  | -2.774072 |
| H | -1.290846 | -0.627629 | -3.946851 |
| H | 1.291129  | 0.628537  | -3.946962 |
| C | 2.664109  | 0.521036  | -2.302717 |
| N | 1.049392  | 2.250077  | -1.004667 |
| N | 2.990663  | 0.912756  | -1.057153 |
| C | 2.206080  | 1.828333  | -0.418752 |
| O | 2.551534  | 2.298048  | 0.705176  |
| H | 3.343239  | -0.187642 | -2.774107 |
| H | -1.542889 | 5.675243  | 0.309010  |
| H | -1.710423 | 4.692309  | 1.624351  |
| H | -0.405638 | 5.697737  | 1.506198  |
| H | 0.406191  | 5.698054  | -1.505273 |
| H | 1.543473  | 5.675119  | -0.308125 |
| H | 1.710848  | 4.692500  | -1.623717 |
| H | 5.493040  | 1.385026  | -1.899969 |
| H | 6.308493  | 1.690855  | -0.499371 |
| H | 6.625005  | 0.315537  | -1.354052 |
| H | 6.308382  | -1.691304 | 0.500037  |
| H | 6.624752  | -0.315883 | 1.354607  |
| H | 5.492657  | -1.385285 | 1.900426  |
| N | 5.888609  | 0.956308  | -1.065485 |
| N | 5.888397  | -0.956673 | 1.065963  |
| N | 1.036990  | 5.098272  | -0.976862 |
| N | -1.036502 | 5.098167  | 0.977619  |
| C | 0.684421  | -1.818690 | 2.232333  |
| C | -0.684590 | -1.818134 | -2.232582 |
| C | 0.684716  | 1.818606  | -2.232449 |
| C | -0.684472 | 1.818255  | 2.232541  |
| N | 0.478413  | 2.241932  | 2.717595  |
| N | -0.478101 | 2.242492  | -2.717466 |
| N | -0.478452 | -2.242546 | 2.717252  |
| N | 0.478274  | -2.241885 | -2.717590 |
| H | -1.187317 | -2.594415 | 2.078084  |
| H | -0.792590 | -1.884933 | 3.605360  |
| H | 0.792442  | -1.884061 | -3.605600 |
| H | 1.187091  | -2.594018 | -2.078522 |
| H | 0.792480  | 1.884098  | 3.605641  |
| H | 1.187360  | 2.593801  | 2.078515  |
| H | -1.186992 | 2.594433  | -2.078371 |
| H | -0.792178 | 1.884912  | -3.605608 |

| <b>Pd-U-Ia (M11L, SMD water)</b> |           |           |           |
|----------------------------------|-----------|-----------|-----------|
| Pd                               | 3.180835  | 2.779311  | -0.273176 |
| Pd                               | 2.623762  | -3.020005 | -0.614082 |
| Pd                               | -3.180779 | -2.779337 | -0.273058 |
| Pd                               | -2.623829 | 3.019981  | -0.614028 |
| C                                | -1.036920 | 2.502216  | 1.801912  |
| C                                | -5.148788 | 0.467108  | 1.615243  |
| C                                | 0.061265  | 2.407781  | 2.603077  |
| H                                | -2.045699 | 2.454887  | 2.212527  |
| C                                | -4.722898 | -0.761602 | 1.203728  |
| H                                | -5.170571 | -1.675453 | 1.595008  |
| C                                | 4.722896  | 0.761554  | 1.203663  |
| C                                | -0.061125 | -2.407683 | 2.603128  |
| H                                | 5.170625  | 1.675401  | 1.594889  |
| C                                | 5.148681  | -0.467151 | 1.615298  |
| C                                | 1.037017  | -2.502131 | 1.801898  |
| H                                | 2.045825  | -2.454908 | 2.212455  |
| H                                | 0.031102  | -2.278516 | 3.676139  |
| H                                | 5.947774  | -0.578588 | 2.340298  |
| H                                | -0.030907 | 2.278584  | 3.676091  |
| H                                | -5.947938 | 0.578539  | 2.340176  |
| N                                | 3.512704  | -1.401753 | 0.166930  |
| N                                | 3.739958  | 0.934095  | 0.296660  |
| N                                | 0.955430  | -2.680247 | 0.464510  |
| N                                | -1.395312 | -2.640271 | 0.650319  |
| N                                | -3.739900 | -0.934139 | 0.296779  |
| N                                | -3.512681 | 1.401697  | 0.167015  |
| N                                | -0.955403 | 2.680364  | 0.464520  |
| N                                | 1.395351  | 2.640380  | 0.650198  |
| C                                | 4.514660  | -1.615987 | 1.073976  |
| O                                | 4.825863  | -2.815887 | 1.374106  |
| C                                | -1.350801 | -2.523297 | 2.015727  |
| O                                | -2.433387 | -2.544114 | 2.681003  |
| C                                | -4.514826 | 1.615952  | 1.073855  |
| O                                | -4.826231 | 2.815853  | 1.373764  |
| C                                | 1.350912  | 2.523555  | 2.015621  |
| O                                | 2.433512  | 2.544400  | 2.680872  |
| C                                | 3.127605  | -0.162932 | -0.238721 |
| O                                | 2.221669  | -0.026785 | -1.117729 |
| C                                | 0.277526  | 2.710926  | -0.117181 |
| O                                | 0.382625  | 2.836699  | -1.383534 |
| C                                | -0.277566 | -2.710820 | -0.117120 |
| O                                | -0.382789 | -2.836762 | -1.383451 |
| C                                | -3.127525 | 0.162881  | -0.238579 |
| O                                | -2.221681 | 0.026738  | -1.117671 |
| N                                | 2.622084  | 4.650215  | -0.862291 |
| H                                | 3.215752  | 5.047674  | -1.586553 |
| H                                | 1.677580  | 4.544603  | -1.233753 |
| N                                | 4.995130  | 2.938596  | -1.206069 |
| H                                | 5.132471  | 3.831148  | -1.675434 |
| H                                | 5.744426  | 2.822572  | -0.526265 |
| N                                | 1.754166  | -4.697780 | -1.395044 |
| H                                | 2.255352  | -5.083478 | -2.191507 |
| H                                | 1.675437  | -5.421903 | -0.685023 |
| N                                | 4.373786  | -3.362552 | -1.598647 |
| H                                | 4.382542  | -4.212929 | -2.157134 |
| H                                | 4.590581  | -2.574199 | -2.204039 |
| N                                | -4.994790 | -2.938517 | -1.206519 |
| H                                | -5.081187 | -2.199212 | -1.900826 |
| H                                | -5.131995 | -3.831076 | -1.675907 |



|   |           |           |           |
|---|-----------|-----------|-----------|
| N | -2.621920 | -4.650261 | -0.862161 |
| H | -2.604065 | -5.293075 | -0.074354 |
| H | -3.215646 | -5.047861 | -1.586287 |
| N | -1.754427 | 4.697842  | -1.395059 |
| H | -2.255755 | 5.083593  | -2.191408 |
| H | -1.675554 | 5.421924  | -0.685013 |
| N | -4.373868 | 3.362261  | -1.598550 |
| H | -4.382765 | 4.212765  | -2.156837 |
| H | -4.590399 | 2.574001  | -2.204157 |
| H | -5.744299 | -2.822447 | -0.526961 |
| H | -5.095160 | 3.430276  | -0.881413 |
| H | -0.820665 | 4.405631  | -1.687571 |
| H | -1.677511 | -4.544464 | -1.233808 |
| H | 5.094994  | -3.430934 | -0.881460 |
| H | 2.604503  | 5.293112  | -0.074541 |
| H | 5.081791  | 2.199283  | -1.900337 |
| H | 0.820361  | -4.405515 | -1.687363 |

**Pd-U-IIa (M11L, SMD water)**

|    |           |           |           |
|----|-----------|-----------|-----------|
| Pd | 3.870971  | 1.911528  | -0.145624 |
| Pd | 1.745747  | -3.454205 | -0.770910 |
| Pd | -3.822699 | -1.789708 | -0.245590 |
| Pd | -1.661131 | 3.600000  | -0.680901 |
| C  | -0.269017 | 2.955187  | 1.835788  |
| C  | -4.752573 | 1.891043  | 1.649803  |
| C  | 0.756566  | 2.626540  | 2.670249  |
| H  | -1.257613 | 3.202761  | 2.221941  |
| C  | 4.664939  | -0.478678 | 1.389879  |
| C  | -0.702865 | -2.533103 | 2.559863  |
| H  | 5.332569  | 0.257748  | 1.837986  |
| C  | 4.700032  | -1.789282 | 1.766587  |
| C  | 0.320217  | -2.861963 | 1.722863  |
| H  | 1.303033  | -3.137102 | 2.105561  |
| H  | -0.572639 | -2.525494 | 3.636675  |
| H  | 5.389566  | -2.143953 | 2.525090  |
| H  | 0.624352  | 2.599828  | 3.746455  |
| H  | -5.485138 | 2.247201  | 2.366219  |
| N  | 2.959426  | -2.181903 | 0.196461  |
| N  | 3.819078  | -0.007868 | 0.450411  |
| N  | 0.185847  | -2.895915 | 0.378272  |
| N  | -2.060155 | -2.217536 | 0.633660  |
| N  | -3.809894 | 0.133724  | 0.347927  |
| N  | -2.901554 | 2.300628  | 0.211229  |
| N  | -0.131453 | 3.012955  | 0.493175  |
| N  | 2.117805  | 2.348589  | 0.741610  |
| C  | 3.811134  | -2.698709 | 1.134809  |
| O  | 3.765009  | -3.946970 | 1.388042  |
| C  | -1.970606 | -2.212011 | 2.001188  |
| O  | -2.999889 | -1.941731 | 2.696256  |
| C  | -3.814257 | 2.720326  | 1.111929  |
| C  | 2.028808  | 2.328391  | 2.108883  |
| O  | 3.062764  | 2.063918  | 2.798719  |
| C  | 2.951215  | -0.869963 | -0.155920 |
| O  | 2.154204  | -0.450022 | -1.051192 |
| C  | 1.074188  | 2.686779  | -0.057864 |
| O  | 1.227753  | 2.723775  | -1.323661 |
| C  | -1.016755 | -2.551916 | -0.168815 |
| O  | -1.168185 | -2.568057 | -1.435685 |
| C  | -2.895323 | 0.991058  | -0.178776 |
| O  | -2.051736 | 0.593188  | -1.040060 |

|   |           |           |           |
|---|-----------|-----------|-----------|
| N | 3.904847  | 3.850639  | -0.771992 |
| H | 4.669809  | 4.079984  | -1.402184 |
| H | 3.019133  | 3.987827  | -1.259634 |
| N | 5.649326  | 1.476203  | -1.059145 |
| H | 6.097590  | 2.283992  | -1.486198 |
| H | 6.299127  | 1.077963  | -0.383384 |
| N | 0.547300  | -4.776727 | -1.767614 |
| H | 0.942355  | -5.098519 | -2.648106 |
| H | 0.343760  | -5.589925 | -1.191669 |
| N | 3.381138  | -4.006042 | -1.854662 |
| H | 3.193789  | -4.708306 | -2.567036 |
| H | 3.773255  | -3.183925 | -2.308797 |
| N | -5.626178 | -1.373283 | -1.104675 |
| H | -5.518781 | -0.663013 | -1.824895 |
| H | -6.095536 | -2.178011 | -1.512041 |
| N | -3.837690 | -3.731502 | -0.878218 |
| H | -3.852602 | -4.362736 | -0.080790 |
| H | -4.616004 | -3.967828 | -1.489243 |
| N | -0.445614 | 4.970506  | -1.578793 |
| H | -0.838740 | 5.357615  | -2.433639 |
| H | -0.232989 | 5.738038  | -0.946512 |
| N | -3.217669 | 4.206530  | -1.849813 |
| H | -3.009311 | 4.045249  | -2.833462 |
| H | -4.057265 | 3.682030  | -1.612466 |
| H | -6.195830 | -0.997131 | -0.346551 |
| H | -3.409796 | 5.198134  | -1.722462 |
| H | 0.409991  | 4.456538  | -1.794810 |
| H | -2.962477 | -3.860502 | -1.385588 |
| H | 4.078972  | -4.378188 | -1.212762 |
| H | 3.945313  | 4.482325  | 0.024189  |
| H | 5.488018  | 0.782381  | -1.786778 |
| H | -0.314098 | -4.258309 | -1.947792 |
| C | -4.775397 | 0.533329  | 1.232088  |
| O | -5.645733 | -0.311312 | 1.624970  |
| H | -3.761944 | 3.775605  | 1.382564  |

**Pd-U-IIIa (M11L, SMD water)**

|    |           |           |           |
|----|-----------|-----------|-----------|
| Pd | 3.060937  | 2.892838  | -0.359232 |
| Pd | 2.911535  | -2.895352 | -0.470080 |
| Pd | -2.911685 | -2.818226 | -0.490250 |
| Pd | -2.715113 | 3.067227  | -0.457604 |
| C  | -5.194776 | 0.203602  | 1.401232  |
| C  | 0.131416  | 2.674195  | 2.701563  |
| C  | 4.594018  | 1.079240  | 1.386932  |
| C  | 0.026814  | -2.417505 | 2.585620  |
| H  | 4.933019  | 2.038341  | 1.779996  |
| C  | 5.074034  | -0.100823 | 1.873582  |
| C  | 1.172177  | -2.471159 | 1.850862  |
| H  | 2.155068  | -2.407277 | 2.318792  |
| H  | 0.049469  | -2.304213 | 3.664144  |
| H  | 5.809623  | -0.129806 | 2.669598  |
| H  | 0.127438  | 2.595046  | 3.783314  |
| H  | -6.059001 | 0.240267  | 2.055752  |
| N  | 3.652558  | -1.207333 | 0.319789  |
| N  | 3.682644  | 1.143087  | 0.394270  |
| N  | 1.171857  | -2.629693 | 0.508772  |
| N  | -1.187457 | -2.649020 | 0.550194  |
| N  | -3.615667 | -1.029242 | 0.113547  |
| N  | -3.474153 | 1.319677  | 0.188917  |
| N  | -1.030346 | 2.891257  | 0.634471  |

|   |           |           |           |
|---|-----------|-----------|-----------|
| N | 1.323662  | 2.757395  | 0.643852  |
| C | 4.596964  | -1.312220 | 1.304843  |
| O | 4.995234  | -2.471012 | 1.655204  |
| C | -1.222971 | -2.551393 | 1.918503  |
| O | -2.338245 | -2.605009 | 2.523212  |
| C | -4.541066 | 1.334893  | 1.013690  |
| C | 1.291551  | 2.638510  | 1.988427  |
| C | 3.199519  | -0.014737 | -0.146500 |
| O | 2.347385  | 0.030551  | -1.086476 |
| C | 0.148085  | 2.856861  | -0.038909 |
| O | 0.162149  | 2.942266  | -1.312258 |
| C | -0.022320 | -2.681638 | -0.146831 |
| O | -0.040268 | -2.792961 | -1.419176 |
| C | -3.001837 | 0.122657  | -0.273028 |
| O | -2.016319 | 0.095685  | -1.075385 |
| N | 2.438043  | 4.679518  | -1.124353 |
| H | 3.045031  | 5.040906  | -1.856463 |
| H | 1.510699  | 4.497187  | -1.510953 |
| N | 4.833539  | 3.055455  | -1.354307 |
| H | 5.304916  | 3.930920  | -1.136626 |
| H | 5.450324  | 2.286734  | -1.100107 |
| N | 2.153745  | -4.611756 | -1.282396 |
| H | 2.698497  | -4.960083 | -2.067413 |
| H | 2.090053  | -5.348722 | -0.584445 |
| N | 4.724973  | -3.168610 | -1.358817 |
| H | 4.832916  | -4.073725 | -1.811342 |
| H | 4.885900  | -2.440581 | -2.051264 |
| N | -4.667027 | -3.024736 | -1.509769 |
| H | -4.761208 | -2.303005 | -2.219803 |
| H | -4.793267 | -3.931902 | -1.952159 |
| N | -2.236177 | -4.642468 | -1.110602 |
| H | -2.190664 | -5.294208 | -0.331275 |
| H | -2.801579 | -5.060484 | -1.845518 |
| N | -1.988299 | 4.847714  | -1.132378 |
| H | -2.540468 | 5.250584  | -1.885808 |
| H | -1.927481 | 5.527248  | -0.378384 |
| N | -4.397295 | 3.308429  | -1.596463 |
| H | -4.863113 | 4.186565  | -1.376320 |
| H | -4.153369 | 3.318379  | -2.585413 |
| H | -5.383007 | -2.890751 | -0.794435 |
| H | -5.058158 | 2.549733  | -1.441752 |
| H | -1.049684 | 4.638102  | -1.475100 |
| H | -1.294658 | -4.475892 | -1.467039 |
| H | 5.426515  | -3.083289 | -0.624599 |
| H | 2.364393  | 5.382584  | -0.393012 |
| H | 4.675863  | 3.019226  | -2.359370 |
| H | 1.216562  | -4.363307 | -1.603798 |
| C | -4.728015 | -1.044461 | 0.913400  |
| O | -5.294297 | -2.158660 | 1.170203  |
| H | -4.862076 | 2.321003  | 1.349694  |
| H | 2.260396  | 2.526856  | 2.476803  |
| C | -1.097439 | 2.846594  | 2.004099  |
| O | -2.221770 | 2.974854  | 2.580424  |

**Pd-U-IVa (M11L, SMD water)**

|    |           |           |           |
|----|-----------|-----------|-----------|
| Pd | 0.000000  | 4.459474  | -0.081058 |
| Pd | 3.616501  | 0.000000  | -0.919675 |
| Pd | 0.000000  | -4.459474 | -0.081058 |
| Pd | -3.616501 | 0.000000  | -0.919675 |
| C  | -3.503462 | 1.724916  | 1.503833  |

|   |           |           |           |
|---|-----------|-----------|-----------|
| C | -3.092207 | -2.753570 | 2.296955  |
| C | -3.092207 | 2.753570  | 2.296955  |
| H | -4.316445 | 1.068561  | 1.810971  |
| C | 3.092207  | -2.753570 | 2.296955  |
| C | 3.092207  | 2.753570  | 2.296955  |
| C | 3.503462  | -1.724916 | 1.503833  |
| H | 4.316445  | -1.068561 | 1.810971  |
| H | 3.555543  | -2.950162 | 3.257720  |
| H | 3.555543  | 2.950162  | 3.257720  |
| H | -3.555543 | 2.950162  | 3.257720  |
| H | -3.555543 | -2.950162 | 3.257720  |
| N | 2.963415  | 1.474137  | 0.294182  |
| N | 1.489672  | 3.289149  | 0.619730  |
| N | 2.963415  | -1.474137 | 0.294182  |
| N | 1.489672  | -3.289149 | 0.619730  |
| N | -1.489672 | -3.289149 | 0.619730  |
| N | -2.963415 | -1.474137 | 0.294182  |
| N | -2.963415 | 1.474137  | 0.294182  |
| N | -1.489672 | 3.289149  | 0.619730  |
| C | 3.503462  | 1.724916  | 1.503833  |
| C | 2.037988  | -3.590874 | 1.839559  |
| O | 1.601942  | -4.592343 | 2.491041  |
| C | -3.503462 | -1.724916 | 1.503833  |
| C | -2.037988 | 3.590874  | 1.839559  |
| O | -1.601942 | 4.592343  | 2.491041  |
| C | 1.970538  | 2.293978  | -0.169693 |
| O | 1.516963  | 2.122195  | -1.344806 |
| C | -1.970538 | 2.293978  | -0.169693 |
| O | -1.516963 | 2.122195  | -1.344806 |
| C | 1.970538  | -2.293978 | -0.169693 |
| O | 1.516963  | -2.122195 | -1.344806 |
| C | -1.970538 | -2.293978 | -0.169693 |
| O | -1.516963 | -2.122195 | -1.344806 |
| N | -1.491547 | 5.671329  | -0.779303 |
| H | -1.168811 | 6.400904  | -1.410657 |
| H | -2.177850 | 5.102262  | -1.269713 |
| N | 1.491547  | 5.671329  | -0.779303 |
| H | 1.168811  | 6.400904  | -1.410657 |
| H | 1.953594  | 6.113722  | 0.012926  |
| N | 4.252786  | -1.479326 | -2.170582 |
| H | 4.622727  | -1.146719 | -3.058210 |
| H | 4.962210  | -2.054606 | -1.723810 |
| N | 4.252786  | 1.479326  | -2.170582 |
| H | 4.622727  | 1.146719  | -3.058210 |
| H | 3.422413  | 2.046216  | -2.344342 |
| N | -1.491547 | -5.671329 | -0.779303 |
| H | -2.177850 | -5.102262 | -1.269713 |
| H | -1.168811 | -6.400904 | -1.410657 |
| N | 1.491547  | -5.671329 | -0.779303 |
| H | 1.953594  | -6.113722 | 0.012926  |
| H | 1.168811  | -6.400904 | -1.410657 |
| N | -4.252786 | 1.479326  | -2.170582 |
| H | -4.622727 | 1.146719  | -3.058210 |
| H | -4.962210 | 2.054606  | -1.723810 |
| N | -4.252786 | -1.479326 | -2.170582 |
| H | -4.622727 | -1.146719 | -3.058210 |
| H | -3.422413 | -2.046216 | -2.344342 |
| H | -1.953594 | -6.113722 | 0.012926  |
| H | -4.962210 | -2.054606 | -1.723810 |
| H | -3.422413 | 2.046216  | -2.344342 |

|   |           |           |           |
|---|-----------|-----------|-----------|
| H | 2.177850  | -5.102262 | -1.269713 |
| H | 4.962210  | 2.054606  | -1.723810 |
| H | -1.953594 | 6.113722  | 0.012926  |
| H | 2.177850  | 5.102262  | -1.269713 |
| H | 3.422413  | -2.046216 | -2.344342 |
| C | -2.037988 | -3.590874 | 1.839559  |
| O | -1.601942 | -4.592343 | 2.491041  |
| H | -4.316445 | -1.068561 | 1.810971  |
| C | 2.037988  | 3.590874  | 1.839559  |
| O | 1.601942  | 4.592343  | 2.491041  |
| H | 4.316445  | 1.068561  | 1.810971  |

**Pd-U-Ib (M11L, SMD water)**

|    |           |           |           |
|----|-----------|-----------|-----------|
| Pd | -2.570451 | -3.227389 | 0.368990  |
| Pd | -3.384789 | 2.391977  | -0.138350 |
| Pd | 2.267322  | 3.298682  | -0.139408 |
| Pd | 3.098799  | -2.502615 | -0.789365 |
| C  | -2.667075 | -0.638241 | -3.025536 |
| C  | 0.669869  | -1.572934 | 2.576562  |
| C  | 1.694628  | -1.767542 | 1.698995  |
| H  | 2.714743  | -1.484461 | 1.957093  |
| C  | -1.564552 | 1.738079  | 2.132710  |
| C  | 5.271746  | 0.597792  | 1.059394  |
| H  | -2.496961 | 1.403706  | 2.584800  |
| C  | -0.394904 | 1.751224  | 2.832821  |
| C  | 4.469512  | 1.676823  | 0.834593  |
| H  | 4.706869  | 2.655273  | 1.253505  |
| H  | 6.175300  | 0.672801  | 1.654280  |
| H  | -0.349887 | 1.422189  | 3.865757  |
| H  | 0.839155  | -1.126786 | 3.551398  |
| N  | 0.672840  | 2.587163  | 0.877050  |
| N  | -1.646205 | 2.144895  | 0.848569  |
| N  | 3.346185  | 1.618398  | 0.090829  |
| N  | 3.727263  | -0.680240 | -0.224268 |
| N  | 1.529539  | -2.334404 | 0.482192  |
| N  | -0.774630 | -2.538499 | 0.959358  |
| N  | -3.159242 | 0.639713  | -1.084440 |
| N  | -2.810097 | -1.679745 | -0.889002 |
| C  | -2.589290 | -1.736090 | -2.217368 |
| H  | -2.346147 | -2.719920 | -2.616945 |
| H  | -2.499511 | -0.708723 | -4.094707 |
| C  | 4.887875  | -0.648680 | 0.503356  |
| O  | 5.553215  | -1.728241 | 0.651004  |
| C  | -0.636910 | -1.998784 | 2.210340  |
| O  | -1.649592 | -1.934863 | 2.977341  |
| C  | -2.954068 | 0.622841  | -2.436689 |
| O  | -3.037711 | 1.715520  | -3.089465 |
| C  | 0.787647  | 2.220025  | 2.193249  |
| O  | 1.906642  | 2.336967  | 2.785563  |
| C  | -3.141038 | -0.483360 | -0.321235 |
| O  | -3.446244 | -0.431038 | 0.908028  |
| C  | -0.514383 | 2.557566  | 0.214013  |
| O  | -0.578584 | 2.940374  | -1.000971 |
| C  | 2.967760  | 0.426473  | -0.458902 |
| O  | 1.939875  | 0.358792  | -1.199820 |
| C  | 0.268152  | -2.702166 | 0.105629  |
| O  | 0.068259  | -3.219625 | -1.041003 |
| N  | -2.313099 | -4.751174 | 1.698848  |
| H  | -3.104013 | -5.389035 | 1.752556  |
| H  | -1.481313 | -5.286569 | 1.460189  |

|   |           |           |           |
|---|-----------|-----------|-----------|
| N | -4.376394 | -3.968306 | -0.233438 |
| H | -4.320642 | -4.959685 | -0.457504 |
| H | -5.075423 | -3.845779 | 0.496669  |
| N | -3.606013 | 4.182752  | 0.825113  |
| H | -3.757241 | 4.940797  | 0.162918  |
| H | -4.397973 | 4.155041  | 1.463965  |
| N | -5.100885 | 2.674335  | -1.200250 |
| H | -5.834966 | 2.039064  | -0.899334 |
| H | -5.456622 | 3.625903  | -1.151352 |
| N | 1.237061  | 5.041835  | -0.373216 |
| H | 1.123860  | 5.526900  | 0.512998  |
| H | 1.669552  | 5.679985  | -1.036879 |
| N | 3.835608  | 4.097036  | -1.182080 |
| H | 4.200532  | 4.922272  | -0.710252 |
| H | 4.592757  | 3.423810  | -1.277737 |
| N | 2.551568  | -4.399760 | -1.316112 |
| H | 2.893244  | -4.666522 | -2.236284 |
| H | 2.892350  | -5.075679 | -0.637214 |
| N | 4.743402  | -2.618600 | -1.982296 |
| H | 5.521477  | -2.401912 | -1.357991 |
| H | 4.889188  | -3.534130 | -2.400957 |
| H | 0.323504  | 4.754801  | -0.726953 |
| H | -2.766944 | 4.390345  | 1.363306  |
| H | -4.839846 | 2.459800  | -2.163875 |
| H | -4.689915 | -3.467977 | -1.062555 |
| H | -2.172375 | -4.325883 | 2.614304  |
| H | 1.529961  | -4.384219 | -1.321613 |
| H | 3.539122  | 4.371391  | -2.117010 |
| H | 4.702648  | -1.925984 | -2.725504 |

**Pd-U-IIb1 (M11L, SMD water)**

|    |           |           |           |
|----|-----------|-----------|-----------|
| Pd | -1.657442 | -3.697676 | -0.365588 |
| Pd | 3.817979  | -1.709087 | 0.039197  |
| Pd | 1.764086  | 3.738489  | 0.015139  |
| Pd | -3.689154 | 1.720589  | -0.629964 |
| C  | 2.419335  | 0.858469  | -3.036297 |
| C  | -1.179849 | 2.338829  | 2.726914  |
| C  | -2.209824 | 2.047033  | 1.882993  |
| H  | -3.157205 | 1.655697  | 2.255002  |
| C  | -4.689228 | -1.628759 | 1.770898  |
| C  | 0.742648  | -2.412694 | 2.892967  |
| C  | -3.798426 | -2.555592 | 1.314975  |
| C  | -0.273534 | -2.848476 | 2.096087  |
| H  | -1.245331 | -3.117878 | 2.510394  |
| H  | -3.775028 | -3.569188 | 1.716262  |
| H  | -5.404698 | -1.863533 | 2.551107  |
| H  | 0.621639  | -2.318557 | 3.966617  |
| H  | -1.262085 | 2.184744  | 3.797178  |
| N  | -0.144263 | -2.989640 | 0.761215  |
| N  | 2.070545  | -2.194665 | 0.927986  |
| N  | -2.897489 | -2.290507 | 0.347540  |
| N  | -3.735443 | -0.097967 | 0.218935  |
| N  | -2.142144 | 2.243442  | 0.548549  |
| N  | 0.067438  | 3.017090  | 0.818970  |
| N  | 3.037344  | -0.153776 | -0.974061 |
| N  | 2.173060  | 2.036746  | -0.980570 |
| C  | 2.048317  | 1.958852  | -2.320881 |
| H  | 1.636271  | 2.841350  | -2.810021 |
| H  | 2.320820  | 0.822116  | -4.115819 |
| C  | -4.670812 | -0.331151 | 1.191245  |

|   |           |           |           |
|---|-----------|-----------|-----------|
| O | -5.464162 | 0.610153  | 1.520431  |
| C | 0.021046  | 2.860947  | 2.178926  |
| O | 1.033013  | 3.199335  | 2.875516  |
| C | 2.959470  | -0.253215 | -2.336513 |
| O | 3.387288  | -1.312048 | -2.904702 |
| C | 1.985330  | -2.080355 | 2.290402  |
| O | 3.011524  | -1.704903 | 2.947086  |
| C | -2.855282 | -1.042377 | -0.203353 |
| O | -2.007110 | -0.778016 | -1.111321 |
| C | 1.042736  | -2.655844 | 0.168971  |
| O | 1.180103  | -2.803127 | -1.087276 |
| C | -0.987032 | 2.738100  | 0.010134  |
| O | -0.908556 | 2.946364  | -1.242731 |
| C | 2.685696  | 0.971610  | -0.296434 |
| O | 2.845194  | 1.045221  | 0.961902  |
| N | -3.656691 | 3.571276  | -1.500729 |
| H | -4.157259 | 3.616868  | -2.385327 |
| H | -4.043445 | 4.274533  | -0.876378 |
| N | -5.267027 | 1.124523  | -1.774295 |
| H | -5.728602 | 1.890441  | -2.259978 |
| H | -4.935787 | 0.456069  | -2.466762 |
| N | -0.409036 | -5.139650 | -1.088106 |
| H | -0.221194 | -5.851137 | -0.386293 |
| H | -0.760199 | -5.598640 | -1.924861 |
| N | -3.219128 | -4.382670 | -1.488702 |
| H | -3.382407 | -3.728899 | -2.252282 |
| H | -3.063407 | -5.306260 | -1.887606 |
| N | 4.659391  | -3.241896 | 1.095679  |
| H | 5.675210  | -3.259885 | 1.049651  |
| H | 4.369374  | -3.078193 | 2.060273  |
| N | 5.567596  | -1.247140 | -0.903563 |
| H | 6.332128  | -1.891381 | -0.717727 |
| H | 5.343632  | -1.268460 | -1.898702 |
| N | 1.368704  | 5.458320  | 1.032661  |
| H | 2.095830  | 6.166040  | 0.961907  |
| H | 0.491950  | 5.864093  | 0.715098  |
| N | 3.490705  | 4.484028  | -0.787139 |
| H | 3.711833  | 5.428387  | -0.478304 |
| H | 4.263742  | 3.874957  | -0.527201 |
| H | 4.306715  | -4.143590 | 0.784484  |
| H | 5.865285  | -0.308107 | -0.650575 |
| H | 1.272060  | 5.171017  | 2.006707  |
| H | 3.422377  | 4.492094  | -1.803012 |
| H | -2.664475 | 3.757410  | -1.659277 |
| H | -5.952945 | 0.659783  | -1.183183 |
| H | -4.064007 | -4.421501 | -0.921478 |
| H | 0.450765  | -4.635595 | -1.312011 |

**Pd-U-Iib2 (M11L, SMD water)**

|    |           |           |           |
|----|-----------|-----------|-----------|
| Pd | 4.084030  | 1.447343  | -0.328419 |
| Pd | -1.194507 | 3.777218  | -0.098454 |
| Pd | -4.193301 | -1.092363 | 0.340104  |
| Pd | 1.009600  | -3.575125 | -0.664324 |
| C  | -2.713647 | 1.068143  | -3.001711 |
| C  | -0.680589 | -1.603739 | 2.700514  |
| C  | 0.152110  | -2.194989 | 1.796936  |
| C  | 4.675052  | -2.472696 | 1.112801  |
| C  | 1.067569  | 1.487773  | 2.666723  |
| C  | 4.789322  | -1.162474 | 0.755308  |
| H  | 5.427379  | -2.967139 | 1.717047  |

|   |           |           |           |
|---|-----------|-----------|-----------|
| H | 0.937131  | 1.114565  | 3.677032  |
| H | -0.349914 | -1.379319 | 3.708884  |
| N | 2.422951  | 1.831794  | 0.741945  |
| N | 0.183994  | 2.569411  | 0.740154  |
| N | 3.875657  | -0.524145 | -0.003813 |
| N | 2.613344  | -2.508483 | -0.077880 |
| N | -0.227854 | -2.505000 | 0.536756  |
| N | -2.342586 | -1.553169 | 1.004756  |
| N | -2.128296 | 2.266264  | -1.029729 |
| N | -3.458347 | 0.332915  | -0.867095 |
| C | -2.054275 | 2.077721  | -2.362873 |
| C | 0.042434  | 2.078631  | 1.990164  |
| C | 2.771888  | -1.204231 | -0.436070 |
| O | 1.923203  | -0.635722 | -1.189384 |
| C | 1.381422  | 2.428432  | 0.105475  |
| O | 1.522718  | 2.880007  | -1.079034 |
| C | -1.488634 | -2.152447 | 0.134953  |
| O | -1.869833 | -2.404740 | -1.052812 |
| C | -2.864064 | 1.399915  | -0.273525 |
| O | -3.008829 | 1.610413  | 0.969623  |
| N | -0.532811 | -4.788298 | -1.236892 |
| H | -0.370937 | -5.237349 | -2.135115 |
| H | -0.692803 | -5.512230 | -0.540698 |
| N | 2.303230  | -4.666880 | -1.794480 |
| H | 1.889029  | -5.494839 | -2.216231 |
| H | 2.700721  | -4.091764 | -2.532694 |
| N | 4.303287  | 3.445916  | -0.663067 |
| H | 4.576519  | 3.945036  | 0.179306  |
| H | 4.976678  | 3.655994  | -1.396025 |
| N | 5.765016  | 1.075029  | -1.433430 |
| H | 5.575912  | 1.244933  | -2.419476 |
| H | 6.532990  | 1.679203  | -1.148063 |
| N | -0.236948 | 5.311056  | 0.851115  |
| H | -0.689215 | 6.214513  | 0.726800  |
| H | -0.197984 | 5.107761  | 1.848108  |
| N | -2.555687 | 5.064792  | -0.905527 |
| H | -3.164076 | 5.439370  | -0.180310 |
| H | -2.091940 | 5.845143  | -1.367265 |
| N | -4.909468 | -2.503298 | 1.630444  |
| H | -5.919179 | -2.472598 | 1.750410  |
| H | -4.648501 | -3.439718 | 1.331255  |
| N | -6.033911 | -0.667030 | -0.430441 |
| H | -6.755094 | -1.341172 | -0.186739 |
| H | -6.343736 | 0.258768  | -0.146069 |
| H | 0.717606  | 5.379447  | 0.504034  |
| H | -3.136444 | 4.586826  | -1.591187 |
| H | -4.462944 | -2.305370 | 2.525792  |
| H | -5.883431 | -0.676045 | -1.440230 |
| H | -1.346194 | -4.173274 | -1.304082 |
| H | 3.044884  | -4.955358 | -1.157053 |
| H | 6.066270  | 0.107869  | -1.333142 |
| H | 3.373682  | 3.750632  | -0.956686 |
| C | 2.339495  | 1.389071  | 2.038102  |
| O | 3.379051  | 0.944813  | 2.617651  |
| C | 3.529918  | -3.188394 | 0.680256  |
| O | 3.317139  | -4.417904 | 0.949587  |
| C | -2.006246 | -1.283092 | 2.303756  |
| C | -2.884385 | -0.786417 | 3.082454  |
| O | -3.468577 | 0.149330  | -2.222402 |
| O | -4.145296 | -0.813730 | -2.713373 |

|   |           |           |           |
|---|-----------|-----------|-----------|
| H | -0.945957 | 2.191442  | 2.434106  |
| H | 5.642389  | -0.561394 | 1.072528  |
| H | 1.173552  | -2.465694 | 2.064702  |
| H | -2.662822 | 0.949229  | -4.078552 |
| H | -1.441627 | 2.795624  | -2.907967 |

**Pd-U-IIb3 (M11L, SMD water)**

|    |           |           |           |
|----|-----------|-----------|-----------|
| Pd | -0.958045 | -3.789835 | -0.465211 |
| Pd | 4.165257  | -1.176767 | 0.208682  |
| Pd | 1.373931  | 3.934859  | 0.153937  |
| Pd | -3.784427 | 1.417677  | -0.637843 |
| C  | 2.580721  | 1.243256  | -2.881306 |
| C  | -1.367772 | 2.101841  | 2.814845  |
| C  | -4.667579 | -2.398816 | 0.968146  |
| C  | 1.042027  | -2.127154 | 2.922178  |
| C  | -3.529888 | -3.095666 | 0.693944  |
| H  | -5.499202 | -2.848384 | 1.499681  |
| H  | 0.867614  | -2.021835 | 3.987509  |
| H  | -1.426737 | 1.919830  | 3.882453  |
| N  | 0.360542  | -2.898971 | 0.777251  |
| N  | 2.410791  | -1.754904 | 1.009381  |
| N  | -2.485804 | -2.565885 | 0.022826  |
| N  | -3.662241 | -0.529134 | -0.110569 |
| N  | -2.327080 | 1.990453  | 0.637246  |
| N  | -0.172207 | 2.903736  | 0.921821  |
| N  | 3.305597  | 0.323778  | -0.810442 |
| N  | 2.103017  | 2.342722  | -0.825091 |
| C  | 2.019191  | 2.260737  | -2.168222 |
| C  | -0.259540 | 2.651132  | 2.245148  |
| C  | 2.157703  | -1.618183 | 2.328641  |
| C  | -2.544060 | -1.259969 | -0.378646 |
| O  | -1.572617 | -0.746297 | -1.015637 |
| C  | 1.490462  | -2.381324 | 0.221941  |
| O  | 1.702524  | -2.505958 | -1.027438 |
| C  | -1.210812 | 2.560056  | 0.109210  |
| O  | -1.137065 | 2.794408  | -1.141201 |
| C  | 2.764307  | 1.370069  | -0.133150 |
| O  | 2.887442  | 1.461676  | 1.128608  |
| N  | -3.932996 | 3.378282  | -1.189494 |
| H  | -4.547555 | 3.542483  | -1.982815 |
| H  | -4.251462 | 3.949952  | -0.411288 |
| N  | -5.278372 | 0.853059  | -1.907764 |
| H  | -5.759121 | 1.627800  | -2.358632 |
| H  | -4.924182 | 0.229434  | -2.628284 |
| N  | 0.530415  | -5.094337 | -0.955964 |
| H  | 0.758837  | -5.693313 | -0.166692 |
| H  | 0.313985  | -5.683797 | -1.756336 |
| N  | -2.251838 | -4.695867 | -1.768458 |
| H  | -2.282740 | -4.154519 | -2.630760 |
| H  | -1.975709 | -5.647622 | -2.002534 |
| N  | 5.062963  | -2.710493 | 1.224646  |
| H  | 6.056255  | -2.546018 | 1.375519  |
| H  | 4.623126  | -2.841588 | 2.133804  |
| N  | 5.922982  | -0.622855 | -0.659244 |
| H  | 6.695597  | -1.261302 | -0.486501 |
| H  | 5.709352  | -0.611805 | -1.657566 |
| N  | 0.614727  | 5.577114  | 1.102698  |
| H  | 1.135782  | 6.432672  | 0.921177  |
| H  | -0.345462 | 5.718287  | 0.795714  |
| N  | 2.940435  | 4.997068  | -0.610921 |

|   |           |           |           |
|---|-----------|-----------|-----------|
| H | 3.197041  | 5.798212  | -0.037659 |
| H | 3.751364  | 4.386994  | -0.689014 |
| H | 4.960483  | -3.576420 | 0.699236  |
| H | 6.201238  | 0.310097  | -0.365336 |
| H | 0.604444  | 5.421260  | 2.108939  |
| H | 2.704615  | 5.332788  | -1.542783 |
| H | -2.976764 | 3.640855  | -1.433895 |
| H | -5.934656 | 0.346452  | -1.312635 |
| H | -3.194490 | -4.728900 | -1.385436 |
| H | 1.331967  | -4.502174 | -1.178762 |
| C | -2.482004 | 1.790385  | 1.985153  |
| O | -3.591161 | 1.364741  | 2.435236  |
| C | 0.110107  | -2.847997 | 2.123790  |
| O | -0.904435 | -3.448661 | 2.598018  |
| C | -4.755307 | -1.053809 | 0.524562  |
| O | -5.793961 | -0.328226 | 0.680476  |
| C | 3.275058  | 0.225544  | -2.175590 |
| O | 3.874962  | -0.747961 | -2.739396 |
| H | 2.513573  | 1.201483  | -3.962838 |
| H | 1.479973  | 3.070388  | -2.660318 |
| H | 0.612347  | 2.927077  | 2.839016  |
| H | -3.412002 | -4.133746 | 1.006269  |
| H | 2.915851  | -1.084375 | 2.902141  |

**Pd-U-IIb4 (M11L, SMD water)**

|    |           |           |           |
|----|-----------|-----------|-----------|
| Pd | 3.635347  | 1.774165  | -0.274858 |
| Pd | -1.876575 | 3.666433  | -0.115878 |
| Pd | -3.904487 | -1.766054 | 0.342723  |
| Pd | 1.519480  | -3.673122 | -0.817152 |
| C  | -2.689280 | 0.625009  | -2.951567 |
| C  | -0.473113 | -2.491249 | 2.734616  |
| C  | 4.777442  | -2.002945 | 1.289350  |
| C  | 0.808974  | 2.319971  | 2.870962  |
| H  | 5.574158  | -2.385011 | 1.917780  |
| H  | 0.785188  | 2.209598  | 3.949783  |
| H  | -0.200096 | -2.394012 | 3.779364  |
| N  | 1.969562  | 2.176002  | 0.796801  |
| N  | -0.277375 | 2.891188  | 0.830786  |
| N  | 3.678849  | -0.186295 | 0.207445  |
| N  | 2.837408  | -2.372025 | -0.039527 |
| N  | 0.110610  | -3.063188 | 0.494457  |
| N  | -2.067171 | -2.296478 | 0.980125  |
| N  | -2.383095 | 1.921324  | -0.979979 |
| N  | -3.188653 | -0.282297 | -0.808480 |
| C  | -3.108748 | -0.394337 | -2.148472 |
| C  | -0.286265 | 2.728087  | 2.170826  |
| C  | 2.750328  | -1.035475 | -0.312087 |
| O  | 1.823359  | -0.601786 | -1.063427 |
| C  | 0.860663  | 2.605251  | 0.135485  |
| O  | 0.890204  | 2.765644  | -1.127780 |
| C  | -1.155797 | -2.751174 | 0.081176  |
| O  | -1.483540 | -2.905643 | -1.137531 |
| C  | -2.846564 | 0.897962  | -0.214166 |
| O  | -2.979502 | 1.034553  | 1.042359  |
| N  | 0.227480  | -5.061444 | -1.564920 |
| H  | 0.480332  | -5.393127 | -2.492186 |
| H  | 0.160958  | -5.861560 | -0.941457 |
| N  | 2.993739  | -4.270355 | -2.098220 |
| H  | 2.733631  | -5.059711 | -2.685887 |
| H  | 3.239487  | -3.489002 | -2.702897 |

|   |           |           |           |
|---|-----------|-----------|-----------|
| N | 3.622122  | 3.740808  | -0.822660 |
| H | 3.847771  | 4.340837  | -0.033368 |
| H | 4.260775  | 3.957864  | -1.584020 |
| N | 5.357286  | 1.394973  | -1.302716 |
| H | 5.197607  | 0.699286  | -2.027470 |
| H | 5.783797  | 2.213660  | -1.729841 |
| N | -1.409957 | 5.469547  | 0.731232  |
| H | -2.241846 | 6.018619  | 0.939401  |
| H | -0.893095 | 5.336516  | 1.598055  |
| N | -3.483729 | 4.457519  | -1.088323 |
| H | -3.628776 | 5.452482  | -0.934509 |
| H | -3.293716 | 4.286656  | -2.076357 |
| N | -4.635478 | -3.244458 | 1.541408  |
| H | -5.645083 | -3.228519 | 1.662277  |
| H | -4.366612 | -4.163119 | 1.198801  |
| N | -5.759486 | -1.191923 | -0.300757 |
| H | -6.527252 | -1.662531 | 0.173900  |
| H | -5.856291 | -0.189508 | -0.151706 |
| H | -0.825006 | 6.008624  | 0.095663  |
| H | -4.330542 | 3.960425  | -0.823772 |
| H | -4.185409 | -3.073218 | 2.442404  |
| H | -5.843060 | -1.373313 | -1.299052 |
| H | -0.670276 | -4.574703 | -1.608125 |
| H | 3.823650  | -4.531581 | -1.568712 |
| H | 5.994862  | 1.008921  | -0.605392 |
| H | 2.665579  | 3.924099  | -1.127149 |
| C | 0.422252  | -2.921003 | 1.800980  |
| C | 2.013958  | 2.057034  | 2.162082  |
| O | 3.106465  | 1.739966  | 2.729997  |
| C | 3.828986  | -2.822988 | 0.757213  |
| C | -2.311846 | 1.852401  | -2.345684 |
| O | -1.937001 | 2.881950  | -2.998545 |
| H | -2.643134 | 0.517206  | -4.029741 |
| H | -3.409066 | -1.356818 | -2.560939 |
| H | -1.229734 | 2.953480  | 2.668316  |
| C | -1.788091 | -2.162071 | 2.314253  |
| O | -2.709935 | -1.768816 | 3.102963  |
| C | 4.723084  | -0.617162 | 0.981043  |
| O | 5.598813  | 0.224041  | 1.369318  |
| H | 1.443272  | -3.184114 | 2.077152  |
| H | 3.833171  | -3.897299 | 0.945681  |

**Pd-U-IIIb1 (M11L, SMD water)**

|    |           |           |           |
|----|-----------|-----------|-----------|
| Pd | 2.593542  | -2.934427 | -0.481734 |
| Pd | 2.728132  | 2.974407  | -0.639932 |
| Pd | -3.023071 | 3.000553  | 0.184417  |
| Pd | -3.161793 | -2.798316 | 0.193802  |
| C  | -1.168600 | -2.253332 | 2.288819  |
| C  | -2.932542 | 0.082148  | -2.899620 |
| H  | -2.084835 | -2.105516 | 2.860765  |
| C  | 0.056669  | -2.225582 | 2.883273  |
| C  | -0.972610 | 2.560623  | 2.244452  |
| C  | 5.274593  | 0.013240  | 0.958093  |
| H  | -1.875697 | 2.420613  | 2.839008  |
| C  | 0.263856  | 2.549937  | 2.815667  |
| C  | 4.648251  | 1.169481  | 0.602208  |
| H  | 5.074536  | 2.143411  | 0.844185  |
| H  | 6.220319  | 0.016363  | 1.488386  |
| H  | 0.394767  | 2.406079  | 3.882826  |
| H  | 0.168114  | -2.053007 | 3.948446  |

|   |           |           |           |
|---|-----------|-----------|-----------|
| N | 1.172399  | 2.877503  | 0.641479  |
| N | -1.165489 | 2.756858  | 0.921597  |
| N | 3.475878  | 1.194074  | -0.063770 |
| N | 3.460891  | -1.161838 | -0.044386 |
| N | 1.012138  | -2.634747 | 0.740535  |
| N | -1.331363 | -2.477976 | 0.967537  |
| N | -2.979201 | 1.274382  | -0.840097 |
| N | -3.144656 | -1.069425 | -0.827954 |
| C | -2.877340 | 1.241590  | -2.183613 |
| H | -2.863078 | 0.077848  | -3.981817 |
| H | -2.757731 | 2.208069  | -2.673746 |
| C | 4.663846  | -1.218312 | 0.606710  |
| O | 5.184136  | -2.357033 | 0.856044  |
| C | 1.210442  | -2.472283 | 2.086856  |
| O | 2.381994  | -2.568005 | 2.569295  |
| C | -3.081335 | -1.141051 | -2.193392 |
| O | -3.172518 | -2.282280 | -2.755282 |
| C | 1.402575  | 2.761752  | 1.988055  |
| O | 2.586623  | 2.863928  | 2.436038  |
| C | 2.865035  | 0.014477  | -0.388069 |
| O | 1.763856  | 0.024623  | -1.020586 |
| C | -0.228497 | -2.636771 | 0.181245  |
| O | -0.363011 | -2.815732 | -1.072685 |
| C | -0.079462 | 2.895747  | 0.109223  |
| O | -0.239532 | 3.069777  | -1.142178 |
| C | -3.128099 | 0.107240  | -0.149014 |
| O | -3.265485 | 0.131471  | 1.113690  |
| N | 2.021191  | 4.792933  | -1.229504 |
| H | 2.121544  | 5.480297  | -0.486883 |
| H | 2.465814  | 5.159435  | -2.067774 |
| N | 4.286475  | 3.065155  | -1.964058 |
| H | 4.180266  | 2.320069  | -2.649920 |
| H | 4.341393  | 3.950098  | -2.463829 |
| N | 4.205400  | -3.273853 | -1.690665 |
| H | 5.012219  | -3.101584 | -1.089415 |
| H | 4.259337  | -4.219706 | -2.060144 |
| N | 1.742142  | -4.731847 | -0.958231 |
| H | 0.780593  | -4.500469 | -1.213519 |
| H | 2.190713  | -5.209493 | -1.736445 |
| N | -4.991720 | -3.156921 | -0.624269 |
| H | -5.319642 | -4.112405 | -0.508006 |
| H | -5.694483 | -2.525705 | -0.248375 |
| N | -3.170254 | -4.560134 | 1.237563  |
| H | -4.026212 | -5.097395 | 1.117805  |
| H | -2.386958 | -5.135102 | 0.933965  |
| N | -4.913618 | 3.240402  | -0.543591 |
| H | -5.466639 | 2.422475  | -0.293737 |
| H | -5.389571 | 4.067363  | -0.189782 |
| N | -3.124588 | 4.759442  | 1.222502  |
| H | -2.669440 | 5.501394  | 0.694054  |
| H | -4.083089 | 5.047300  | 1.409818  |
| H | 5.170805  | 2.923603  | -1.479536 |
| H | 1.030022  | 4.628612  | -1.414010 |
| H | 1.740167  | -5.355973 | -0.155567 |
| H | 4.217968  | -2.621643 | -2.470147 |
| H | -4.861871 | -2.967701 | -1.618788 |
| H | -3.053372 | -4.368829 | 2.230871  |
| H | -2.644911 | 4.671786  | 2.116674  |
| H | -4.882880 | 3.302276  | -1.559660 |

| <b>Pd-U-IIIb2 (M11L, SMD water)</b> |           |           |           |
|-------------------------------------|-----------|-----------|-----------|
| Pd                                  | 3.047597  | -2.828372 | -0.563247 |
| Pd                                  | 2.658851  | 2.986642  | -0.417241 |
| Pd                                  | -3.167805 | 2.673666  | 0.011932  |
| Pd                                  | -2.775553 | -3.113690 | 0.065200  |
| C                                   | -2.637828 | -0.221169 | -3.051389 |
| C                                   | 0.436614  | -2.446490 | 2.750193  |
| C                                   | 5.113042  | 0.180915  | 1.590807  |
| C                                   | 0.003795  | 2.301050  | 2.811748  |
| H                                   | 5.918029  | 0.209375  | 2.316622  |
| H                                   | 0.104245  | 2.133810  | 3.878538  |
| H                                   | 0.552458  | -2.260314 | 3.812226  |
| N                                   | 0.999768  | 2.665418  | 0.678238  |
| N                                   | -1.346682 | 2.568555  | 0.871466  |
| N                                   | 3.489342  | 1.283292  | 0.245950  |
| N                                   | 3.673174  | -1.059539 | 0.152480  |
| N                                   | 1.397802  | -2.725689 | 0.587798  |
| N                                   | -0.939707 | -2.864036 | 0.855605  |
| N                                   | -2.932273 | 0.947466  | -0.999298 |
| N                                   | -2.693491 | -1.395449 | -0.980769 |
| H                                   | -2.545600 | -0.226195 | -4.131984 |
| C                                   | 4.666472  | -0.994637 | 1.063767  |
| C                                   | 1.510141  | -2.483575 | 1.911376  |
| C                                   | -2.568912 | -1.372370 | -2.322547 |
| C                                   | 1.094913  | 2.441731  | 2.006215  |
| C                                   | 3.071196  | 0.094847  | -0.263136 |
| O                                   | 2.147022  | 0.053201  | -1.133358 |
| C                                   | 0.153754  | -2.914726 | 0.052476  |
| O                                   | 0.028876  | -3.155668 | -1.190929 |
| C                                   | -0.237982 | 2.714313  | 0.100842  |
| O                                   | -0.342378 | 2.921219  | -1.150782 |
| C                                   | -2.883336 | -0.222251 | -0.307312 |
| O                                   | -3.030071 | -0.234245 | 0.953400  |
| N                                   | 1.839707  | 4.728701  | -1.104456 |
| H                                   | 1.830945  | 5.439773  | -0.377699 |
| H                                   | 2.318896  | 5.107127  | -1.917781 |
| N                                   | 4.397726  | 3.298288  | -1.434338 |
| H                                   | 4.538422  | 2.547146  | -2.106127 |
| H                                   | 4.439648  | 4.186336  | -1.929113 |
| N                                   | 4.752971  | -2.946061 | -1.677655 |
| H                                   | 5.516587  | -2.468916 | -1.201278 |
| H                                   | 5.038002  | -3.908260 | -1.848765 |
| N                                   | 2.430566  | -4.643732 | -1.254575 |
| H                                   | 1.441578  | -4.510344 | -1.474044 |
| H                                   | 2.927662  | -4.953919 | -2.086020 |
| N                                   | -4.650374 | -3.351229 | -0.713617 |
| H                                   | -5.132969 | -4.179363 | -0.371924 |
| H                                   | -5.207332 | -2.534280 | -0.469254 |
| N                                   | -2.900219 | -4.828800 | 1.161499  |
| H                                   | -3.832844 | -5.233456 | 1.193320  |
| H                                   | -2.255403 | -5.535494 | 0.817044  |
| N                                   | -4.980212 | 2.832872  | -0.913666 |
| H                                   | -5.615167 | 2.103158  | -0.600650 |
| H                                   | -5.432139 | 3.734636  | -0.781835 |
| N                                   | -3.434852 | 4.393191  | 1.079813  |
| H                                   | -2.796377 | 5.119988  | 0.767534  |
| H                                   | -4.383707 | 4.757145  | 1.040618  |
| H                                   | 5.153274  | 3.269255  | -0.751466 |
| H                                   | 0.880260  | 4.483664  | -1.357205 |
| H                                   | 2.529114  | -5.357131 | -0.536281 |

|   |           |           |           |
|---|-----------|-----------|-----------|
| H | 4.610131  | -2.491291 | -2.577420 |
| H | -4.601557 | -3.407722 | -1.729089 |
| H | -2.626894 | -4.551136 | 2.105052  |
| H | -3.211899 | 4.137520  | 2.042511  |
| H | -4.774371 | 2.700397  | -1.904289 |
| H | -2.417678 | -2.340346 | -2.801173 |
| C | -2.844135 | 1.004540  | -2.363293 |
| O | -2.968816 | 2.133716  | -2.944119 |
| C | -1.287421 | 2.391581  | 2.228344  |
| O | -2.374154 | 2.336055  | 2.892586  |
| H | 2.107693  | 2.395815  | 2.407277  |
| H | 2.524014  | -2.331403 | 2.281331  |
| C | -0.857884 | -2.659497 | 2.208002  |
| O | -1.925321 | -2.685014 | 2.903007  |
| C | 4.502236  | 1.389256  | 1.160220  |
| O | 4.848320  | 2.547248  | 1.564030  |
| H | 5.102307  | -1.950811 | 1.355795  |

| <b>Pd-U-IVb (M11L, SMD water)</b> |           |           |           |
|-----------------------------------|-----------|-----------|-----------|
| Pd                                | -0.568984 | -3.615410 | -0.612659 |
| Pd                                | 4.422221  | -0.706415 | 0.324756  |
| Pd                                | 0.809311  | 3.738011  | -0.085334 |
| Pd                                | -4.261358 | 0.980042  | -0.391039 |
| C                                 | -0.299973 | 1.903873  | 1.960619  |
| C                                 | 2.616696  | 1.224951  | -2.994781 |
| H                                 | 0.677212  | 2.073018  | 2.412334  |
| C                                 | -1.283887 | 1.230046  | 2.620291  |
| C                                 | -4.317586 | -2.950560 | 1.159581  |
| C                                 | 1.015630  | -1.540073 | 2.736230  |
| C                                 | -3.097298 | -3.415180 | 0.774811  |
| C                                 | 0.204972  | -2.166127 | 1.835830  |
| H                                 | -0.796845 | -2.495851 | 2.111681  |
| H                                 | -2.736620 | -4.396805 | 1.085900  |
| H                                 | -4.980187 | -3.535298 | 1.788476  |
| H                                 | 0.686487  | -1.344567 | 3.751214  |
| H                                 | -1.128710 | 0.841361  | 3.621433  |
| N                                 | 0.583733  | -2.435940 | 0.567052  |
| N                                 | 2.647606  | -1.370969 | 1.017047  |
| N                                 | -2.261113 | -2.710190 | -0.017491 |
| N                                 | -3.834214 | -0.959857 | -0.057278 |
| N                                 | -2.653903 | 1.514695  | 0.695709  |
| N                                 | -0.474617 | 2.415226  | 0.723145  |
| N                                 | 3.489144  | 0.613304  | -0.868996 |
| N                                 | 1.877541  | 2.319891  | -1.015855 |
| C                                 | 1.821990  | 2.126285  | -2.348836 |
| H                                 | 1.106042  | 2.747199  | -2.887281 |
| H                                 | 2.572641  | 1.097519  | -4.070900 |
| C                                 | -4.717358 | -1.660255 | 0.718679  |
| O                                 | -5.846803 | -1.142037 | 1.003041  |
| C                                 | -2.543191 | 1.053254  | 1.983205  |
| O                                 | -3.546741 | 0.517211  | 2.547713  |
| C                                 | 3.506479  | 0.427697  | -2.223489 |
| O                                 | 4.306007  | -0.432036 | -2.720856 |
| C                                 | 2.315469  | -1.142065 | 2.325438  |
| O                                 | 3.174680  | -0.606650 | 3.099923  |
| C                                 | -2.631866 | -1.465279 | -0.445756 |
| O                                 | -1.867395 | -0.811579 | -1.220400 |
| C                                 | -1.657223 | 2.200420  | 0.079328  |
| O                                 | -1.822737 | 2.664716  | -1.097286 |
| C                                 | 2.742797  | 1.574622  | -0.268384 |

|   |           |           |           |
|---|-----------|-----------|-----------|
| O | 2.862203  | 1.804019  | 0.974254  |
| C | 1.815983  | -2.003423 | 0.148900  |
| O | 2.186336  | -2.213280 | -1.049754 |
| H | 0.914644  | -5.264522 | -1.995487 |
| H | 1.805082  | -4.022509 | -1.321112 |
| H | 1.337116  | -5.335331 | -0.401885 |
| H | -1.338418 | -4.958693 | -2.690180 |
| H | -1.836088 | -5.745261 | -1.325979 |
| H | -2.663450 | -4.422479 | -1.866716 |
| H | -5.346001 | 3.124465  | -1.437992 |
| H | -4.966498 | 3.415698  | 0.142616  |
| H | -3.754527 | 3.342802  | -0.997576 |
| H | -6.531019 | 1.139516  | -1.697311 |
| H | -5.620172 | -0.090436 | -2.317662 |
| H | -6.361131 | -0.278811 | -0.841016 |
| H | -0.154533 | 5.083845  | 1.869002  |
| H | -0.035297 | 6.128780  | 0.597683  |
| H | -1.273957 | 5.043010  | 0.659699  |
| H | 2.255517  | 4.912905  | -1.860438 |
| H | 1.840383  | 6.060533  | -0.752598 |
| H | 3.026088  | 4.967757  | -0.405585 |
| H | 6.415788  | 0.875732  | -0.171553 |
| H | 6.981170  | -0.673886 | -0.249278 |
| H | 6.021699  | -0.079847 | -1.473625 |
| H | 5.170232  | -2.977247 | 1.330085  |
| H | 6.321968  | -1.858097 | 1.715498  |
| H | 4.861367  | -1.845286 | 2.505880  |
| N | 1.066168  | -4.710155 | -1.156731 |
| N | -1.736461 | -4.830193 | -1.761618 |
| N | 6.191520  | -0.070883 | -0.466908 |
| N | 5.322175  | -2.011894 | 1.610515  |
| N | 2.126045  | 5.090262  | -0.866085 |
| N | -0.285633 | 5.178626  | 0.863661  |
| N | -4.655652 | 2.957785  | -0.709895 |
| N | -5.893620 | 0.383472  | -1.461078 |

**Pd-U-Ic (M11L, SMD water)**

|    |           |           |           |
|----|-----------|-----------|-----------|
| Pd | 0.784479  | 3.601641  | -0.003596 |
| Pd | 0.213845  | -0.071996 | 4.624779  |
| Pd | -0.784479 | -3.601641 | 0.003596  |
| Pd | -0.213845 | 0.071996  | -4.624779 |
| C  | 2.465663  | -3.058159 | 2.684856  |
| C  | -2.466974 | 2.264742  | 2.381113  |
| C  | -1.657952 | 2.851397  | 1.454846  |
| H  | -2.054262 | 3.543790  | 0.713498  |
| C  | 1.657952  | -2.851397 | -1.454846 |
| C  | -2.465663 | 3.058159  | -2.684856 |
| H  | 2.054262  | -3.543790 | -0.713498 |
| C  | 2.466974  | -2.264742 | -2.381113 |
| C  | -2.028443 | 1.985573  | -3.402329 |
| H  | -2.672120 | 1.499767  | -4.136382 |
| H  | -3.453760 | 3.479654  | -2.837493 |
| H  | 3.535264  | -2.451144 | -2.400011 |
| H  | -3.535264 | 2.451144  | 2.400011  |
| N  | 0.528264  | -1.214595 | -3.265872 |
| N  | 0.323789  | -2.642629 | -1.400282 |
| N  | -0.785717 | 1.466101  | -3.278961 |
| N  | -0.400013 | 2.986861  | -1.518443 |
| N  | -0.323789 | 2.642629  | 1.400282  |
| N  | -0.528264 | 1.214595  | 3.265872  |

|   |           |           |           |
|---|-----------|-----------|-----------|
| N | 0.400013  | -2.986861 | 1.518443  |
| N | 0.785717  | -1.466101 | 3.278961  |
| C | 2.028443  | -1.985573 | 3.402329  |
| H | 2.672120  | -1.499767 | 4.136382  |
| H | 3.453760  | -3.479654 | 2.837493  |
| C | -1.583599 | 3.635758  | -1.734121 |
| O | -1.843565 | 4.696439  | -1.076903 |
| C | -1.883749 | 1.397899  | 3.336163  |
| O | -2.541373 | 0.803099  | 4.254100  |
| C | 1.583599  | -3.635758 | 1.734121  |
| O | 1.843565  | -4.696439 | 1.076903  |
| C | 1.883749  | -1.397899 | -3.336163 |
| O | 2.541373  | -0.803099 | -4.254100 |
| C | 0.048373  | 1.979732  | -2.322845 |
| O | 1.232687  | 1.549092  | -2.187427 |
| C | 0.248401  | 1.804901  | 2.322427  |
| O | 1.505336  | 1.599784  | 2.300372  |
| C | -0.048373 | -1.979732 | 2.322845  |
| O | -1.232687 | -1.549092 | 2.187427  |
| C | -0.248401 | -1.804901 | -2.322427 |
| O | -1.505336 | -1.599784 | -2.300372 |
| N | 1.861584  | 4.567122  | -1.434563 |
| H | 2.625537  | 5.133827  | -1.074583 |
| H | 2.242693  | 3.858203  | -2.058672 |
| N | 2.004659  | 4.262494  | 1.495023  |
| H | 2.892936  | 4.628164  | 1.159542  |
| H | 1.543944  | 4.986038  | 2.041177  |
| N | -0.869023 | 1.327453  | -6.107771 |
| H | -0.212258 | 1.334259  | -6.885771 |
| H | -1.774001 | 1.019700  | -6.459821 |
| N | 0.335497  | -1.307867 | -6.021861 |
| H | -0.161899 | -2.182442 | -5.875155 |
| H | 0.190406  | -1.012647 | -6.984419 |
| N | -2.004659 | -4.262494 | -1.495023 |
| H | -1.543944 | -4.986038 | -2.041177 |
| H | -2.892936 | -4.628164 | -1.159542 |
| N | -1.861584 | -4.567122 | 1.434563  |
| H | -2.242693 | -3.858203 | 2.058672  |
| H | -2.625537 | -5.133827 | 1.074583  |
| N | 0.869023  | -1.327453 | 6.107771  |
| H | 1.774001  | -1.019700 | 6.459821  |
| H | 0.212258  | -1.334259 | 6.885771  |
| N | -0.335497 | 1.307867  | 6.021861  |
| H | -0.190406 | 1.012647  | 6.984419  |
| H | 0.161899  | 2.182442  | 5.875155  |
| H | -1.332183 | 1.456970  | 5.860010  |
| H | 0.965305  | -2.284151 | 5.773721  |
| H | -2.170088 | -3.441037 | -2.079726 |
| H | -1.239752 | -5.166931 | 1.972348  |
| H | -0.965305 | 2.284151  | -5.773721 |
| H | 1.332183  | -1.456970 | -5.860010 |
| H | 1.239752  | 5.166931  | -1.972348 |
| H | 2.170088  | 3.441037  | 2.079726  |

**Pd-U-IIc1 (M11L, SMD water)**

|    |           |           |           |
|----|-----------|-----------|-----------|
| Pd | -0.374520 | -3.813354 | -0.947735 |
| Pd | -4.437505 | 0.310594  | 0.076540  |
| Pd | 0.236979  | 3.827005  | 0.590586  |
| Pd | 4.414489  | -0.441829 | 0.225770  |
| C  | -2.008684 | 2.308523  | -2.717237 |



|   |           |           |           |
|---|-----------|-----------|-----------|
| C | -2.260902 | -2.327486 | 2.558861  |
| C | -1.531843 | -3.029817 | 1.646647  |
| H | -0.854165 | -3.822726 | 1.957436  |
| C | 2.441756  | -3.562855 | 2.191693  |
| C | 3.545290  | 3.023142  | -1.911131 |
| C | 3.135133  | -2.446475 | 1.838536  |
| C | 3.869029  | 1.758595  | -1.530228 |
| H | 4.626640  | 1.188936  | -2.069271 |
| H | 3.876253  | -2.014298 | 2.511448  |
| H | 2.621481  | -4.069890 | 3.133422  |
| H | 4.040969  | 3.510996  | -2.743857 |
| H | -2.178284 | -2.525471 | 3.621891  |
| N | 3.313609  | 1.130873  | -0.463720 |
| N | 1.869631  | 2.981128  | -0.234145 |
| N | 2.973069  | -1.808390 | 0.654556  |
| N | 1.223694  | -3.311760 | 0.171510  |
| N | -1.612866 | -2.820267 | 0.314065  |
| N | -3.209321 | -1.136987 | 0.737174  |
| N | -1.070442 | 2.811276  | -0.581633 |
| N | -2.937377 | 1.373563  | -0.736802 |
| C | -2.910459 | 1.515266  | -2.079400 |
| H | -3.672468 | 0.961093  | -2.628544 |
| H | -2.014027 | 2.426975  | -3.795310 |
| C | 1.482072  | -4.070478 | 1.278498  |
| O | 0.844391  | -5.160600 | 1.450340  |
| C | -3.138619 | -1.317416 | 2.092703  |
| O | -3.864630 | -0.594342 | 2.851994  |
| C | -1.070154 | 3.037996  | -1.935840 |
| O | -0.267312 | 3.883514  | -2.435534 |
| C | 2.564282  | 3.719262  | -1.154062 |
| O | 2.311421  | 4.957184  | -1.291386 |
| C | -2.488133 | -1.873440 | -0.147204 |
| O | -2.636132 | -1.702484 | -1.399720 |
| C | 1.974231  | -2.228235 | -0.181420 |
| O | 1.749806  | -1.634270 | -1.278718 |
| C | 2.255964  | 1.736130  | 0.163779  |
| O | 1.645889  | 1.159789  | 1.116038  |
| C | -1.995485 | 2.009289  | 0.018992  |
| O | -1.999832 | 1.878613  | 1.285524  |
| N | 0.915418  | -4.803702 | -2.175141 |
| H | 0.469297  | -5.217714 | -2.990756 |
| H | 1.626982  | -4.149106 | -2.494347 |
| N | -1.986065 | -4.342726 | -2.084863 |
| H | -1.739858 | -4.623456 | -3.030884 |
| H | -2.509766 | -5.097731 | -1.649683 |
| N | -5.977952 | -0.745994 | 0.890452  |
| H | -6.872876 | -0.263826 | 0.852529  |
| H | -6.079196 | -1.650817 | 0.437415  |
| N | -5.740685 | 1.746440  | -0.575811 |
| H | -6.213970 | 2.187721  | 0.210766  |
| H | -5.253038 | 2.472561  | -1.097274 |
| N | -1.392619 | 4.700616  | 1.455470  |
| H | -1.996554 | 3.923194  | 1.724695  |
| H | -1.168550 | 5.255234  | 2.278405  |
| N | 1.558030  | 4.878722  | 1.733061  |
| H | 2.167005  | 5.372114  | 1.081890  |
| H | 1.134575  | 5.552050  | 2.367150  |
| N | 5.748992  | -1.907724 | 0.730171  |
| H | 5.335481  | -2.834334 | 0.643758  |
| H | 6.558167  | -1.869849 | 0.111908  |

|   |           |           |           |
|---|-----------|-----------|-----------|
| N | 6.043671  | 0.788369  | 0.047605  |
| H | 5.784251  | 1.772751  | 0.076780  |
| H | 6.695100  | 0.616445  | 0.812508  |
| H | -5.705766 | -0.885430 | 1.864226  |
| H | 1.376723  | -5.545062 | -1.651918 |
| H | -2.554824 | -3.492947 | -2.114600 |
| H | 6.077703  | -1.791480 | 1.687482  |
| H | 6.534458  | 0.614364  | -0.828482 |
| H | -1.881268 | 5.293408  | 0.789707  |
| H | 2.122830  | 4.230206  | 2.276832  |
| H | -6.448894 | 1.339686  | -1.183795 |

**Pd-U-IIc2 (M11L, SMD water)**

|    |           |           |           |
|----|-----------|-----------|-----------|
| Pd | 0.255217  | 3.555887  | 0.806862  |
| Pd | -4.558300 | 0.221261  | -0.117213 |
| Pd | -0.262408 | -3.706928 | -0.591151 |
| Pd | 4.599432  | -0.359609 | -0.198288 |
| C  | -2.677939 | -2.346155 | 2.671696  |
| C  | -1.887530 | 2.296909  | -2.645548 |
| C  | -1.024688 | 2.865281  | -1.757061 |
| H  | -0.219697 | 3.516293  | -2.091888 |
| C  | 3.023210  | 2.918293  | -2.328922 |
| C  | 2.441533  | -2.712309 | 2.536101  |
| C  | 3.606925  | 1.753433  | -1.931507 |
| H  | 4.297813  | 1.224856  | -2.588391 |
| H  | 3.250839  | 3.369716  | -3.288398 |
| H  | 2.557606  | -2.976659 | 3.581106  |
| H  | -1.786517 | 2.456450  | -3.713618 |
| N  | 3.180118  | -1.553230 | 0.594166  |
| N  | 1.278732  | -2.938700 | 0.467656  |
| N  | 3.392319  | 1.183039  | -0.723087 |
| N  | 1.790750  | 2.862963  | -0.302836 |
| N  | -1.118508 | 2.693506  | -0.419408 |
| N  | -3.025528 | 1.349506  | -0.786967 |
| N  | -1.665747 | -2.811350 | 0.565082  |
| N  | -3.362451 | -1.173561 | 0.717470  |
| H  | -2.770950 | -2.549679 | 3.732777  |
| C  | 2.112024  | 3.547548  | -1.441695 |
| O  | 1.570442  | 4.680816  | -1.659503 |
| C  | -2.939674 | 1.491304  | -2.146381 |
| O  | -3.809458 | 0.920729  | -2.886644 |
| C  | -1.805675 | -3.038650 | 1.886580  |
| C  | 1.456653  | -3.253103 | 1.766834  |
| C  | -2.140678 | 1.922993  | 0.071443  |
| O  | -2.270147 | 1.764094  | 1.328238  |
| C  | 2.463023  | 1.749609  | 0.109706  |
| O  | 2.231267  | 1.266117  | 1.257579  |
| C  | 2.172584  | -2.092724 | -0.135164 |
| O  | 2.061418  | -1.842200 | -1.378082 |
| C  | -2.488330 | -1.892260 | -0.034521 |
| O  | -2.435888 | -1.739868 | -1.295737 |
| N  | 1.671001  | 4.400312  | 2.004513  |
| H  | 1.298620  | 4.819357  | 2.853863  |
| H  | 2.329652  | 3.668371  | 2.264355  |
| N  | -1.275853 | 4.311797  | 1.927571  |
| H  | -0.993710 | 4.590577  | 2.864087  |
| H  | -1.695688 | 5.114477  | 1.465414  |
| N  | -5.794974 | 1.614907  | -0.953208 |
| H  | -6.777051 | 1.349982  | -0.962005 |
| H  | -5.706421 | 2.508947  | -0.477120 |

|   |           |           |           |
|---|-----------|-----------|-----------|
| N | -6.138880 | -0.886709 | 0.549136  |
| H | -7.041167 | -0.432529 | 0.430675  |
| H | -6.170676 | -1.792611 | 0.088635  |
| N | -1.808347 | -4.500843 | -1.651118 |
| H | -2.372768 | -3.689465 | -1.910323 |
| H | -1.530715 | -5.008618 | -2.487310 |
| N | 1.144950  | -4.554030 | -1.797836 |
| H | 1.651177  | -5.289590 | -1.310669 |
| H | 0.767788  | -4.937998 | -2.661478 |
| N | 6.184964  | 0.762387  | -0.858892 |
| H | 5.995619  | 1.757627  | -0.758744 |
| H | 7.025224  | 0.550467  | -0.323248 |
| N | 5.868853  | -1.885975 | 0.263320  |
| H | 5.509165  | -2.758547 | -0.117563 |
| H | 6.822742  | -1.758811 | -0.066433 |
| H | -5.463129 | 1.705721  | -1.913791 |
| H | 2.174199  | 5.116354  | 1.485182  |
| H | -1.954815 | 3.549807  | 1.988103  |
| H | 6.382887  | 0.572138  | -1.840098 |
| H | 5.865872  | -1.946200 | 1.281581  |
| H | -2.362136 | -5.122033 | -1.066148 |
| H | 1.783588  | -3.787385 | -2.017795 |
| H | -5.955636 | -1.016563 | 1.544636  |
| C | 3.336979  | -1.793129 | 1.934267  |
| O | 4.286402  | -1.216312 | 2.559783  |
| H | 0.775219  | -3.994837 | 2.177668  |
| C | -3.476260 | -1.339483 | 2.072634  |
| O | -4.301133 | -0.614336 | 2.721993  |
| H | -1.194174 | -3.833545 | 2.306534  |

**Pd-U-IIIc1 (M11L, SMD water)**

|    |           |           |           |
|----|-----------|-----------|-----------|
| Pd | -0.535679 | 3.709790  | 0.622129  |
| Pd | 4.441411  | 0.599675  | -0.002323 |
| Pd | 0.714430  | -3.798800 | -0.869790 |
| Pd | -4.345232 | -0.847828 | 0.074678  |
| C  | -3.937771 | 1.438061  | -1.652824 |
| C  | -1.869838 | -3.254235 | 2.455297  |
| H  | -4.611059 | 0.822341  | -2.250114 |
| C  | -3.713399 | 2.739758  | -1.979474 |
| C  | 2.205419  | -3.200022 | 1.657238  |
| C  | 1.754167  | 2.341361  | -2.714201 |
| H  | 1.736417  | -4.125327 | 1.983253  |
| C  | 2.936069  | -2.445847 | 2.525836  |
| C  | 2.736304  | 1.630932  | -2.098081 |
| H  | 3.523977  | 1.132534  | -2.664453 |
| H  | 1.717379  | 2.448490  | -3.792875 |
| H  | 3.055186  | -2.732030 | 3.564760  |
| H  | -4.214783 | 3.210170  | -2.818749 |
| N  | 3.425576  | -0.994731 | 0.705252  |
| N  | 2.038425  | -2.874594 | 0.359197  |
| N  | 2.814215  | 1.506813  | -0.756018 |
| N  | 0.845588  | 2.792974  | -0.552338 |
| N  | -2.101518 | 2.782016  | -0.244303 |
| N  | -3.378019 | 0.824480  | -0.580209 |
| N  | -0.853782 | -3.286139 | 0.299846  |
| N  | -2.764924 | -1.958502 | 0.670546  |
| C  | -0.941700 | -3.719092 | 1.574043  |
| H  | -1.911712 | -3.609264 | 3.479019  |
| H  | -0.231517 | -4.489603 | 1.864271  |
| C  | 0.790554  | 3.008423  | -1.908403 |

|   |           |           |           |
|---|-----------|-----------|-----------|
| O | -0.083057 | 3.792116  | -2.388675 |
| C | -2.824873 | 3.491435  | -1.162927 |
| O | -2.676974 | 4.751696  | -1.247670 |
| C | -2.803108 | -2.289753 | 2.000881  |
| O | -3.690453 | -1.758646 | 2.747797  |
| C | 3.545103  | -1.259093 | 2.044777  |
| O | 4.211329  | -0.456485 | 2.779128  |
| C | -2.405658 | 1.502271  | 0.111998  |
| O | -1.795214 | 0.959691  | 1.082269  |
| C | 1.846541  | 2.067872  | 0.023861  |
| O | 1.899895  | 1.938081  | 1.290848  |
| C | 2.713076  | -1.788829 | -0.136341 |
| O | 2.680375  | -1.549535 | -1.383712 |
| C | -1.807024 | -2.421160 | -0.171478 |
| O | -1.794205 | -2.078116 | -1.396470 |
| N | -1.938310 | 4.677132  | 1.739014  |
| H | -2.452203 | 4.003852  | 2.302179  |
| H | -1.571979 | 5.402736  | 2.350103  |
| N | 1.026578  | 4.663698  | 1.527000  |
| H | 1.487577  | 5.297515  | 0.879391  |
| H | 0.762984  | 5.187497  | 2.358184  |
| N | -6.120065 | 0.108564  | -0.311217 |
| H | -6.537776 | -0.244370 | -1.171219 |
| H | -6.771557 | -0.070829 | 0.451653  |
| N | -5.434585 | -2.474652 | 0.641869  |
| H | -6.419203 | -2.426134 | 0.389813  |
| H | -5.037057 | -3.316508 | 0.231283  |
| N | 2.292230  | -4.304222 | -2.055806 |
| H | 2.872005  | -5.015461 | -1.618466 |
| H | 2.023962  | -4.630657 | -2.980923 |
| N | -0.631868 | -4.660695 | -2.131402 |
| H | -1.368987 | -3.961641 | -2.236065 |
| H | -0.250582 | -4.884749 | -3.047241 |
| N | 5.532654  | 2.181889  | -0.702394 |
| H | 6.099555  | 1.896916  | -1.499115 |
| H | 4.916218  | 2.934690  | -1.001156 |
| N | 6.141477  | -0.278149 | 0.705906  |
| H | 6.969355  | 0.307605  | 0.626847  |
| H | 5.946481  | -0.461261 | 1.691200  |
| H | 6.155189  | 2.548316  | 0.015060  |
| H | -1.023963 | -5.508598 | -1.729086 |
| H | -5.342564 | -2.527588 | 1.656174  |
| H | -6.016127 | 1.117808  | -0.397123 |
| H | -2.577704 | 5.096370  | 1.064455  |
| H | 1.670095  | 3.913568  | 1.784274  |
| H | 6.322690  | -1.156978 | 0.227825  |
| H | 2.820499  | -3.433952 | -2.143026 |

**Pd-U-IIIc2 (M11L, SMD water)**

|    |           |           |           |
|----|-----------|-----------|-----------|
| Pd | 0.000000  | 3.755588  | 0.011407  |
| Pd | 0.000000  | 0.000000  | -4.512348 |
| Pd | 0.000000  | -3.755588 | 0.011407  |
| Pd | 0.000000  | 0.000000  | 4.627555  |
| C  | -2.165412 | 1.570814  | 3.561655  |
| C  | 2.842295  | -2.558581 | 2.913741  |
| H  | -2.650989 | 0.970854  | 4.332069  |
| C  | -2.842295 | 2.558581  | 2.913741  |
| C  | 2.332400  | -2.444696 | -1.234237 |
| C  | -3.048231 | 1.644473  | -2.074135 |
| H  | 2.820383  | -3.041643 | -0.465638 |

|   |           |           |           |
|---|-----------|-----------|-----------|
| C | 3.048231  | -1.644473 | -2.074135 |
| H | -4.127192 | 1.564598  | -1.996889 |
| H | 4.127192  | -1.564598 | -1.996889 |
| H | -3.872554 | 2.796040  | 3.156588  |
| N | 0.995018  | -1.066742 | -3.121876 |
| N | 0.989919  | -2.577204 | -1.307800 |
| N | -0.995018 | 1.066742  | -3.121876 |
| N | -0.989919 | 2.577204  | -1.307800 |
| N | -0.896984 | 2.875543  | 1.589575  |
| N | -0.866769 | 1.276724  | 3.319573  |
| N | 0.896984  | -2.875543 | 1.589575  |
| N | 0.866769  | -1.276724 | 3.319573  |
| H | 3.872554  | -2.796040 | 3.156588  |
| C | -2.332400 | 2.444696  | -1.234237 |
| C | -2.154565 | 3.300284  | 1.918419  |
| O | -2.650184 | 4.309099  | 1.317347  |
| C | 2.165412  | -1.570814 | 3.561655  |
| C | 2.354842  | -0.913836 | -3.071217 |
| O | 2.925883  | -0.152622 | -3.921675 |
| C | -0.224336 | 1.926703  | 2.301946  |
| O | 0.988018  | 1.670413  | 2.030325  |
| C | -0.313486 | 1.880923  | -2.274416 |
| O | 0.946823  | 2.018555  | -2.388043 |
| C | 0.313486  | -1.880923 | -2.274416 |
| O | -0.946823 | -2.018555 | -2.388043 |
| C | 0.224336  | -1.926703 | 2.301946  |
| O | -0.988018 | -1.670413 | 2.030325  |
| N | 0.975186  | 4.911385  | 1.376092  |
| H | 1.459628  | 4.289856  | 2.021287  |
| H | 1.654645  | 5.552409  | 0.972536  |
| N | 0.882373  | 4.700617  | -1.568897 |
| H | 0.211354  | 5.306176  | -2.034362 |
| H | 1.695933  | 5.256163  | -1.315633 |
| N | -0.690095 | 1.231859  | 6.105513  |
| H | -1.558301 | 0.869860  | 6.497976  |
| H | -0.006783 | 1.300505  | 6.857931  |
| N | 0.690095  | -1.231859 | 6.105513  |
| H | 1.558301  | -0.869860 | 6.497976  |
| H | 0.006783  | -1.300505 | 6.857931  |
| N | -0.882373 | -4.700617 | -1.568897 |
| H | -0.211354 | -5.306176 | -2.034362 |
| H | -1.695933 | -5.256163 | -1.315633 |
| N | -0.975186 | -4.911385 | 1.376092  |
| H | -1.459628 | -4.289856 | 2.021287  |
| H | -1.654645 | -5.552409 | 0.972536  |
| N | -1.032807 | 1.045425  | -5.929524 |
| H | -0.962631 | 0.646467  | -6.862579 |
| H | -2.004866 | 1.004742  | -5.620713 |
| N | 1.032807  | -1.045425 | -5.929524 |
| H | 0.962631  | -0.646467 | -6.862579 |
| H | 2.004866  | -1.004742 | -5.620713 |
| H | -0.728918 | 2.014832  | -5.969739 |
| H | -0.295493 | -5.454150 | 1.904260  |
| H | 0.864123  | -2.170810 | 5.752904  |
| H | -0.864123 | 2.170810  | 5.752904  |
| H | 0.295493  | 5.454150  | 1.904260  |
| H | 1.160493  | 3.944081  | -2.197263 |
| H | 0.728918  | -2.014832 | -5.969739 |
| H | -1.160493 | -3.944081 | -2.197263 |
| C | -2.354842 | 0.913836  | -3.071217 |

|   |           |           |           |
|---|-----------|-----------|-----------|
| O | -2.925883 | 0.152622  | -3.921675 |
| H | -2.820383 | 3.041643  | -0.465638 |
| H | 2.650989  | -0.970854 | 4.332069  |
| C | 2.154565  | -3.300284 | 1.918419  |
| O | 2.650184  | -4.309099 | 1.317347  |

**Pd-U-IVc1 (M11L, SMD water)**

|    |           |           |           |
|----|-----------|-----------|-----------|
| Pd | -3.964114 | 0.496866  | 0.833190  |
| Pd | -0.350869 | -4.228390 | -0.102669 |
| Pd | 4.031761  | -0.164562 | -0.676422 |
| Pd | 0.362731  | 4.342612  | -0.103190 |
| C  | -2.545216 | -3.198199 | -1.630872 |
| C  | 3.172759  | -3.371791 | 1.907395  |
| H  | -2.109097 | -3.934937 | -2.306317 |
| C  | -3.805443 | -2.730147 | -1.835399 |
| C  | -2.176210 | 2.173866  | -2.663196 |
| C  | 2.429130  | 1.943349  | 2.670363  |
| C  | -1.180875 | 2.925393  | -2.121277 |
| C  | 1.592434  | 2.821871  | 2.055595  |
| H  | 0.990753  | 3.532740  | 2.622193  |
| H  | -0.475153 | 3.475468  | -2.744030 |
| H  | -2.313890 | 2.096462  | -3.736213 |
| H  | 2.537527  | 1.917528  | 3.749207  |
| H  | -4.419017 | -3.088697 | -2.654747 |
| N  | 1.466606  | 2.885826  | 0.713817  |
| N  | 2.993821  | 1.103160  | 0.509417  |
| N  | -1.015043 | 3.059424  | -0.788459 |
| N  | -2.822176 | 1.584951  | -0.441391 |
| N  | -3.420925 | -1.236578 | -0.037733 |
| N  | -1.760729 | -2.821527 | -0.587499 |
| N  | 3.161870  | -1.783351 | 0.146982  |
| N  | 1.247461  | -3.109973 | 0.507865  |
| C  | 1.879684  | -3.642359 | 1.584642  |
| H  | 1.287588  | -4.335483 | 2.183033  |
| H  | 3.659984  | -3.846098 | 2.752679  |
| C  | -3.079826 | 1.508582  | -1.788951 |
| O  | -4.099842 | 0.877226  | -2.199167 |
| C  | -4.319927 | -1.773881 | -0.917602 |
| O  | -5.534892 | -1.402687 | -0.884247 |
| C  | 3.893071  | -2.470269 | 1.077479  |
| O  | 5.146638  | -2.277140 | 1.161417  |
| C  | 3.209858  | 1.067716  | 1.865194  |
| O  | 4.091282  | 0.290695  | 2.342962  |
| C  | -2.185694 | -1.768350 | 0.183641  |
| O  | -1.449901 | -1.293853 | 1.101475  |
| C  | 1.883260  | -2.115275 | -0.187539 |
| O  | 1.299118  | -1.515635 | -1.141289 |
| C  | 2.164821  | 2.014323  | -0.068914 |
| O  | 2.062247  | 2.077802  | -1.337205 |
| C  | -1.833384 | 2.374105  | 0.061392  |
| O  | -1.687468 | 2.497706  | 1.321165  |
| H  | -4.575154 | -1.215423 | 2.654699  |
| H  | -5.780306 | -0.082942 | 2.638767  |
| H  | -5.693446 | -1.217658 | 1.430350  |
| H  | -5.142813 | 2.785836  | 1.121590  |
| H  | -4.973430 | 2.118132  | 2.621969  |
| H  | -3.643720 | 2.754632  | 1.848784  |
| H  | -1.715838 | -6.368548 | 0.276643  |
| H  | -2.749721 | -5.247859 | -0.342515 |
| H  | -1.715519 | -6.056281 | -1.344275 |

|   |           |           |           |
|---|-----------|-----------|-----------|
| H | 1.870328  | -5.586351 | 0.039546  |
| H | 0.746945  | -6.298525 | 1.016396  |
| H | 0.692070  | -6.528251 | -0.616699 |
| H | 5.902938  | -1.021568 | -2.299908 |
| H | 5.496857  | -2.145185 | -1.149663 |
| H | 4.537466  | -1.934227 | -2.485484 |
| H | 5.443032  | 1.276197  | -2.349821 |
| H | 4.129072  | 2.098459  | -1.747010 |
| H | 5.516063  | 1.944535  | -0.842160 |
| H | -1.647507 | 5.547103  | -1.197388 |
| H | -0.855274 | 6.624978  | -0.232341 |
| H | -0.252170 | 6.254777  | -1.721159 |
| N | -5.147452 | -0.625403 | 2.055429  |
| N | -4.521148 | 2.248460  | 1.720360  |
| N | -1.810072 | -5.631992 | -0.422053 |
| N | 0.888479  | -5.845298 | 0.114318  |
| N | 5.127923  | -1.459338 | -1.807733 |
| N | 4.906198  | 1.480837  | -1.510292 |
| N | -0.727648 | 5.872107  | -0.905923 |
| N | 1.766110  | 5.664004  | 0.573820  |
| H | 1.611961  | 5.844758  | 1.564268  |
| H | 2.693174  | 5.257135  | 0.466463  |
| H | 1.747867  | 6.555460  | 0.082259  |

**Pd-U-IVc2 (M11L, SMD water)**

|    |           |           |           |
|----|-----------|-----------|-----------|
| Pd | 0.000000  | 3.692636  | -0.013011 |
| Pd | 0.000000  | 0.000000  | -4.571402 |
| Pd | 0.000000  | -3.692636 | -0.013011 |
| Pd | 0.000000  | 0.000000  | 4.581600  |
| C  | -3.061564 | -2.040743 | -2.492740 |
| C  | 3.061564  | 2.040743  | -2.492740 |
| C  | 3.024453  | 2.121000  | 2.535106  |
| C  | -3.024453 | -2.121000 | 2.535106  |
| H  | 4.098459  | 2.230452  | 2.638056  |
| H  | -4.098459 | -2.230452 | 2.638056  |
| H  | 4.139654  | 2.120420  | -2.579548 |
| N  | -0.961090 | -1.158775 | 3.232084  |
| N  | -0.979145 | -2.744153 | 1.483045  |
| N  | 0.961090  | 1.158775  | 3.232084  |
| N  | 0.979145  | 2.744153  | 1.483045  |
| N  | 1.021928  | 2.709901  | -1.458241 |
| N  | 0.982574  | 1.137725  | -3.220123 |
| N  | -1.021928 | -2.709901 | -1.458241 |
| N  | -0.982574 | -1.137725 | -3.220123 |
| H  | -4.139654 | -2.120420 | -2.579548 |
| C  | 2.311745  | 2.867608  | 1.646266  |
| C  | 2.359134  | 2.797095  | -1.603603 |
| C  | -2.359134 | -2.797095 | -1.603603 |
| C  | -2.311745 | -2.867608 | 1.646266  |
| C  | 0.318354  | 1.894047  | -2.308119 |
| O  | -0.951379 | 1.873482  | -2.243141 |
| C  | -0.318354 | -1.894047 | -2.308119 |
| O  | 0.951379  | -1.873482 | -2.243141 |
| C  | -0.286702 | -1.909218 | 2.321975  |
| O  | 0.982064  | -1.864981 | 2.249010  |
| C  | 0.286702  | 1.909218  | 2.321975  |
| O  | -0.982064 | 1.864981  | 2.249010  |
| H  | -1.321783 | 3.891933  | -2.119266 |
| H  | -1.749420 | 5.232023  | -1.225854 |
| H  | -0.324625 | 5.220743  | -2.058008 |

|   |           |           |           |
|---|-----------|-----------|-----------|
| H | -0.531157 | 5.331785  | 1.924073  |
| H | -1.923725 | 5.090841  | 1.070715  |
| H | -1.354675 | 3.889998  | 2.069410  |
| H | 0.703211  | 0.872472  | -6.954217 |
| H | 0.732439  | 2.107539  | -5.861911 |
| H | 1.934815  | 0.963736  | -5.835772 |
| H | -0.732439 | -2.107539 | -5.861911 |
| H | -1.934815 | -0.963736 | -5.835772 |
| H | -0.703211 | -0.872472 | -6.954217 |
| H | 1.749420  | -5.232023 | -1.225854 |
| H | 0.324625  | -5.220743 | -2.058008 |
| H | 1.321783  | -3.891933 | -2.119266 |
| H | 1.923725  | -5.090841 | 1.070715  |
| H | 1.354675  | -3.889998 | 2.069410  |
| H | 0.531157  | -5.331785 | 1.924073  |
| H | 0.696003  | 2.125199  | 5.864965  |
| H | 0.676589  | 0.896950  | 6.964928  |
| H | 1.913467  | 0.997725  | 5.853814  |
| N | -0.973645 | 4.646638  | -1.525489 |
| N | -1.085845 | 4.638773  | 1.428610  |
| N | 0.939641  | 1.121076  | -5.996788 |
| N | -0.939641 | -1.121076 | -5.996788 |
| N | 0.973645  | -4.646638 | -1.525489 |
| N | 1.085845  | -4.638773 | 1.428610  |
| N | 0.915230  | 1.142367  | 6.007192  |
| N | -0.915230 | -1.142367 | 6.007192  |
| H | -1.913467 | -0.997725 | 5.853814  |
| H | -0.696003 | -2.125199 | 5.864965  |
| H | -0.676589 | -0.896950 | 6.964928  |
| C | 2.327833  | 1.182904  | 3.337898  |
| O | 2.902351  | 0.398699  | 4.164289  |
| C | 2.350139  | 1.131669  | -3.315509 |
| O | 2.912610  | 0.345327  | -4.148208 |
| H | 2.864043  | 3.525714  | -0.973953 |
| H | 2.800044  | 3.620146  | 1.031237  |
| H | -2.800044 | -3.620146 | 1.031237  |
| C | -2.327833 | -1.182904 | 3.337898  |
| O | -2.902351 | -0.398699 | 4.164289  |
| H | -2.864043 | -3.525714 | -0.973953 |
| C | -2.350139 | -1.131669 | -3.315509 |
| O | -2.912610 | -0.345327 | -4.148208 |

**Pd-U-Id (M11L, SMD water)**

|    |           |           |           |
|----|-----------|-----------|-----------|
| Pd | -0.710934 | -3.915887 | 0.441184  |
| Pd | 3.915887  | -0.710934 | -0.441184 |
| Pd | -3.915887 | 0.710934  | -0.441184 |
| Pd | 0.710934  | 3.915887  | 0.441184  |
| C  | -0.591059 | 1.614518  | -2.923096 |
| C  | 0.128441  | 2.430428  | -2.098019 |
| H  | -0.216625 | 1.330579  | -3.900789 |
| H  | 1.099568  | 2.823295  | -2.390295 |
| N  | -0.317701 | 2.809153  | -0.884239 |
| N  | -2.248649 | 1.503654  | -1.225424 |
| C  | 0.591059  | -1.614518 | -2.923096 |
| C  | -0.128441 | -2.430428 | -2.098019 |
| H  | 0.216625  | -1.330579 | -3.900789 |
| H  | -1.099568 | -2.823295 | -2.390295 |
| N  | 0.317701  | -2.809153 | -0.884239 |
| N  | 2.248649  | -1.503654 | -1.225424 |
| C  | -1.614518 | -0.591059 | 2.923096  |

|   |           |           |           |
|---|-----------|-----------|-----------|
| C | 1.614518  | 0.591059  | 2.923096  |
| N | 2.809153  | 0.317701  | 0.884239  |
| N | 1.503654  | 2.248649  | 1.225424  |
| C | 2.430428  | -0.128441 | 2.098019  |
| H | 1.330579  | 0.216625  | 3.900789  |
| H | 2.823295  | -1.099568 | 2.390295  |
| H | -1.330579 | -0.216625 | 3.900789  |
| C | -2.430428 | 0.128441  | 2.098019  |
| N | -2.809153 | -0.317701 | 0.884239  |
| N | -1.503654 | -2.248649 | 1.225424  |
| H | -2.823295 | 1.099568  | 2.390295  |
| C | 1.834608  | -1.101748 | -2.465708 |
| O | 2.579254  | -0.317701 | -3.142549 |
| C | 1.101748  | 1.834608  | 2.465708  |
| O | 0.317701  | 2.579254  | 3.142549  |
| C | -1.834608 | 1.101748  | -2.465708 |
| O | -2.579254 | 0.317701  | -3.142549 |
| C | -1.101748 | -1.834608 | 2.465708  |
| O | -0.317701 | -2.579254 | 3.142549  |
| C | 1.538870  | -2.371861 | -0.458654 |
| O | 2.009675  | -2.789359 | 0.644832  |
| C | 2.371861  | 1.538870  | 0.458654  |
| O | 2.789359  | 2.009675  | -0.644832 |
| C | -1.538870 | 2.371861  | -0.458654 |
| O | -2.009675 | 2.789359  | 0.644832  |
| C | -2.371861 | -1.538870 | 0.458654  |
| O | -2.789359 | -2.009675 | -0.644832 |
| N | -5.580272 | -0.131632 | 0.400020  |
| H | -5.679710 | 0.209521  | 1.353465  |
| H | -6.443532 | 0.062298  | -0.102635 |
| N | -4.969482 | 1.702527  | -1.877329 |
| H | -4.469259 | 1.518296  | -2.747105 |
| H | -5.931605 | 1.387880  | -1.975579 |
| N | -1.702527 | -4.969482 | 1.877329  |
| H | -1.387880 | -5.931605 | 1.975579  |
| H | -1.518296 | -4.469259 | 2.747105  |
| N | 0.131632  | -5.580272 | -0.400020 |
| H | -0.062298 | -6.443532 | 0.102635  |
| H | -0.209521 | -5.679710 | -1.353465 |
| N | 4.969482  | -1.702527 | -1.877329 |
| H | 4.469259  | -1.518296 | -2.747105 |
| H | 5.931605  | -1.387880 | -1.975579 |
| N | 5.580272  | 0.131632  | 0.400020  |
| H | 5.679710  | -0.209521 | 1.353465  |
| H | 6.443532  | -0.062298 | -0.102635 |
| N | -0.131632 | 5.580272  | -0.400020 |
| H | -1.140498 | 5.449835  | -0.435793 |
| H | 0.062298  | 6.443532  | 0.102635  |
| N | 1.702527  | 4.969482  | 1.877329  |
| H | 2.703980  | 4.973744  | 1.701782  |
| H | 1.387880  | 5.931605  | 1.975579  |
| H | 4.973744  | -2.703980 | -1.701782 |
| H | 5.449835  | 1.140498  | 0.435793  |
| H | 0.209521  | 5.679710  | -1.353465 |
| H | 1.518296  | 4.469259  | 2.747105  |
| H | -4.973744 | 2.703980  | -1.701782 |
| H | -5.449835 | -1.140498 | 0.435793  |
| H | -2.703980 | -4.973744 | 1.701782  |
| H | 1.140498  | -5.449835 | -0.435793 |

| <b>Pd-U-IIId (M11L, SMD water)</b> |           |           |           |
|------------------------------------|-----------|-----------|-----------|
| Pd                                 | -0.178641 | 3.828383  | -0.280248 |
| Pd                                 | 4.386127  | 0.271608  | 0.024228  |
| Pd                                 | 0.253312  | -3.747299 | 0.015329  |
| Pd                                 | -4.268778 | -0.174949 | 0.270161  |
| C                                  | -1.129687 | -1.036296 | 2.999362  |
| C                                  | -0.342468 | -1.853885 | 2.240826  |
| H                                  | -0.830677 | -0.727187 | 3.995333  |
| H                                  | 0.613847  | -2.222895 | 2.609963  |
| N                                  | -0.699454 | -2.271290 | 1.008476  |
| N                                  | -2.659158 | -0.970087 | 1.180228  |
| C                                  | 1.495468  | 1.510597  | 2.863732  |
| C                                  | 0.652211  | 2.250306  | 2.087153  |
| H                                  | 1.291507  | 1.334941  | 3.914569  |
| H                                  | -0.255044 | 2.693330  | 2.496795  |
| N                                  | 0.889103  | 2.491480  | 0.781849  |
| N                                  | 2.850382  | 1.197730  | 0.932833  |
| C                                  | -2.045237 | 1.220702  | -3.076546 |
| C                                  | 1.991481  | -1.403699 | -3.068876 |
| N                                  | 3.106802  | -0.855516 | -1.036982 |
| N                                  | 1.401333  | -2.476686 | -1.032340 |
| C                                  | 2.908875  | -0.684392 | -2.359214 |
| H                                  | 1.860299  | -1.260082 | -4.135810 |
| H                                  | 3.536413  | 0.067812  | -2.837201 |
| H                                  | -1.959238 | 0.993487  | -4.133497 |
| N                                  | -3.076601 | 0.879955  | -0.959844 |
| N                                  | -1.304678 | 2.418753  | -1.159313 |
| C                                  | -1.205786 | 2.107096  | -2.466883 |
| H                                  | -0.413969 | 2.615592  | -3.017812 |
| C                                  | 2.663846  | 0.964968  | 2.269517  |
| O                                  | 3.540124  | 0.293667  | 2.908314  |
| C                                  | 1.189122  | -2.351178 | -2.377575 |
| O                                  | 0.309155  | -3.085852 | -2.936452 |
| C                                  | -2.366431 | -0.589514 | 2.461545  |
| O                                  | -3.205221 | 0.124633  | 3.103793  |
| C                                  | -3.040124 | 0.573995  | -2.292800 |
| O                                  | -3.887838 | -0.254882 | -2.761977 |
| C                                  | -2.270536 | 1.821276  | -0.401558 |
| O                                  | -2.421072 | 2.165982  | 0.810161  |
| C                                  | 2.004688  | 1.964829  | 0.195634  |
| O                                  | 2.251399  | 2.215367  | -1.025916 |
| C                                  | 2.367269  | -1.788551 | -0.368900 |
| O                                  | 2.596796  | -2.027545 | 0.855771  |
| C                                  | -1.875313 | -1.826374 | 0.472861  |
| O                                  | -2.234492 | -2.234774 | -0.675749 |
| N                                  | -1.257547 | 5.196364  | -1.345719 |
| H                                  | -1.046030 | 6.165075  | -1.114621 |
| H                                  | -1.082654 | 5.062430  | -2.340044 |
| N                                  | 0.966060  | 5.261222  | 0.617847  |
| H                                  | 0.831305  | 6.195221  | 0.236401  |
| H                                  | 0.746878  | 5.288457  | 1.612133  |
| N                                  | -5.435188 | -1.215453 | 1.582416  |
| H                                  | -6.403327 | -0.903826 | 1.604895  |
| H                                  | -5.419724 | -2.211005 | 1.375832  |
| N                                  | -5.870491 | 0.602431  | -0.729326 |
| H                                  | -6.746014 | 0.120368  | -0.540877 |
| H                                  | -5.993447 | 1.590380  | -0.523432 |
| N                                  | -0.915408 | -5.044480 | 1.080982  |
| H                                  | -0.902727 | -5.993087 | 0.713747  |
| H                                  | -0.596943 | -5.072297 | 2.047556  |

|   |           |           |           |
|---|-----------|-----------|-----------|
| N | 1.171151  | -5.240486 | -1.027615 |
| H | 0.738044  | -6.155136 | -0.920211 |
| H | 1.110061  | -4.957947 | -2.006221 |
| N | 5.923542  | -0.691212 | -0.921381 |
| H | 5.985230  | -0.367830 | -1.884757 |
| H | 6.828801  | -0.546075 | -0.478811 |
| N | 5.643506  | 1.394833  | 1.171079  |
| H | 5.261866  | 1.311276  | 2.114331  |
| H | 6.606158  | 1.066931  | 1.171164  |
| H | 1.949724  | 5.018250  | 0.518106  |
| H | -2.248232 | 5.036740  | -1.174153 |
| H | -5.011580 | -1.055799 | 2.496614  |
| H | -5.630498 | 0.489984  | -1.714967 |
| H | -1.878612 | -4.714867 | 1.074272  |
| H | 2.150357  | -5.314031 | -0.763356 |
| H | 5.732754  | -1.690692 | -0.934453 |
| H | 5.633989  | 2.371343  | 0.887343  |

**Pd-U-III d (M11L, SMD water)**

|    |           |           |           |
|----|-----------|-----------|-----------|
| Pd | -4.495687 | -0.057043 | 0.229863  |
| Pd | 0.011535  | 3.434144  | 0.000106  |
| Pd | 4.491666  | -0.075878 | -0.234565 |
| Pd | -0.009418 | -3.610513 | 0.006296  |
| C  | 1.729995  | -0.955021 | 2.843369  |
| H  | 1.513030  | -0.604778 | 3.846888  |
| N  | 3.101895  | -0.966424 | 0.903434  |
| N  | 1.114820  | -2.226974 | 0.926786  |
| C  | -1.411611 | 0.805112  | 3.054905  |
| C  | -2.564523 | 0.355300  | 2.479427  |
| H  | -1.107596 | 0.477094  | 4.043781  |
| H  | -3.215008 | -0.356959 | 2.985531  |
| N  | -2.979183 | 0.768417  | 1.265457  |
| N  | -1.028136 | 2.088046  | 1.088852  |
| C  | -1.732315 | -0.959730 | -2.842798 |
| C  | 1.408207  | 0.790482  | -3.058473 |
| N  | 1.025268  | 2.069988  | -1.090789 |
| N  | 2.976039  | 0.750157  | -1.269197 |
| H  | 1.104318  | 0.464196  | -4.047966 |
| H  | -1.512811 | -0.616823 | -3.848290 |
| C  | -0.868977 | -1.768889 | -2.161688 |
| N  | -1.123473 | -2.219618 | -0.916091 |
| N  | -3.107273 | -0.953538 | -0.905026 |
| H  | 0.066939  | -2.108003 | -2.606868 |
| C  | 0.863440  | -1.766928 | 2.169500  |
| C  | 2.559977  | 0.337763  | -2.483096 |
| H  | -0.072537 | -2.100284 | 2.618808  |
| H  | 3.209191  | -0.375422 | -2.989438 |
| C  | -0.594942 | 1.724154  | 2.336164  |
| O  | 0.479495  | 2.227553  | 2.797520  |
| C  | 0.592979  | 1.711277  | -2.339905 |
| O  | -0.478101 | 2.219158  | -2.803541 |
| C  | 2.923678  | -0.540140 | 2.191803  |
| O  | 3.821980  | 0.182229  | 2.734359  |
| C  | -2.925102 | -0.535480 | -2.195372 |
| O  | -3.819346 | 0.187645  | -2.743666 |
| C  | -2.211878 | 1.663186  | 0.574042  |
| O  | -2.622289 | 2.112055  | -0.538643 |
| C  | -2.266255 | -1.820973 | -0.285364 |
| O  | -2.547655 | -2.282634 | 0.864872  |
| C  | 2.256287  | -1.833707 | 0.290324  |

|   |           |           |           |
|---|-----------|-----------|-----------|
| O | 2.531865  | -2.300524 | -0.859309 |
| C | 2.211091  | 1.647472  | -0.578799 |
| O | 2.624878  | 2.100918  | 0.531031  |
| N | -5.867376 | 0.884700  | 1.419709  |
| H | -6.779614 | 0.434261  | 1.394245  |
| H | -5.540092 | 0.893129  | 2.383519  |
| N | -5.940348 | -0.872500 | -0.953885 |
| H | -6.845937 | -0.416970 | -0.868005 |
| H | -5.581946 | -0.736676 | -1.900492 |
| N | -0.977431 | 4.852757  | 1.089741  |
| H | -0.576782 | 5.784416  | 1.003641  |
| H | -1.948322 | 4.891420  | 0.786132  |
| N | 1.048856  | 4.817856  | -1.089997 |
| H | 0.815331  | 5.784427  | -0.872185 |
| H | 2.043571  | 4.682086  | -0.921117 |
| N | 1.091104  | -5.061468 | 0.928534  |
| H | 0.490751  | -5.676211 | 1.475063  |
| H | 1.587437  | -5.626215 | 0.242491  |
| N | -1.124596 | -5.044342 | -0.924240 |
| H | -0.562514 | -5.540678 | -1.612435 |
| H | -1.488815 | -5.723271 | -0.258807 |
| N | 5.938590  | -0.892429 | 0.946338  |
| H | 6.846830  | -0.443979 | 0.852126  |
| H | 5.586600  | -0.748673 | 1.894111  |
| N | 5.876313  | 0.863317  | -1.408503 |
| H | 6.601208  | 0.220408  | -1.719389 |
| H | 5.427050  | 1.264029  | -2.229235 |
| H | -1.911468 | -4.612769 | -1.405046 |
| H | 1.776154  | -4.643003 | 1.554845  |
| H | -5.979470 | 1.849546  | 1.116121  |
| H | -6.057291 | -1.865981 | -0.773808 |
| H | 0.869226  | 4.659788  | -2.079451 |
| H | -0.961458 | 4.588463  | 2.072783  |
| H | 6.321913  | 1.618432  | -0.890645 |
| H | 6.047289  | -1.887779 | 0.771766  |

**Pd-U-IV d (M11L, SMD water)**

|    |           |           |           |
|----|-----------|-----------|-----------|
| Pd | -0.099411 | -3.321173 | 0.063759  |
| Pd | 4.679865  | -0.035262 | 0.102019  |
| Pd | -4.697994 | 0.044888  | 0.092428  |
| Pd | 0.004531  | 3.318794  | -0.280910 |
| C  | 1.830476  | 1.269639  | 2.951904  |
| C  | 0.937107  | 1.915091  | 2.146234  |
| H  | 1.636909  | 1.119789  | 4.008718  |
| H  | -0.006493 | 2.303271  | 2.531759  |
| N  | 1.163480  | 2.122728  | 0.834539  |
| N  | 3.206318  | 0.969381  | 1.030732  |
| C  | -1.543694 | -0.435627 | 2.845485  |
| C  | -0.709164 | -1.217562 | 2.098585  |
| H  | -1.209879 | 0.022581  | 3.770943  |
| H  | 0.320973  | -1.407236 | 2.400889  |
| N  | -1.102664 | -1.817131 | 0.955072  |
| N  | -3.196923 | -0.752266 | 1.167497  |
| C  | 2.028549  | -1.249776 | -2.960526 |
| C  | -1.694740 | 0.383977  | -2.828832 |
| N  | -3.242515 | 0.805831  | -1.072732 |
| N  | -1.113571 | 1.817027  | -1.017829 |
| H  | -1.427341 | -0.112279 | -3.755982 |
| H  | 1.912238  | -1.077869 | -4.025293 |
| N  | 3.273393  | -1.018938 | -0.945415 |

---

|   |           |           |           |
|---|-----------|-----------|-----------|
| N | 1.201721  | -2.139970 | -0.911901 |
| C | 1.074696  | -1.900806 | -2.233430 |
| C | -0.797737 | 1.162747  | -2.154905 |
| H | 0.161889  | -2.275236 | -2.697942 |
| H | 0.222797  | 1.303425  | -2.513918 |
| C | -3.002491 | 0.224645  | -2.289052 |
| O | -3.937422 | -0.424756 | -2.858240 |
| C | -2.866630 | -0.200759 | 2.375540  |
| O | -3.738220 | 0.485638  | 3.000150  |
| C | 3.191223  | -0.782288 | -2.290529 |
| O | 4.148144  | -0.172299 | -2.872201 |
| C | 3.026889  | 0.768098  | 2.373369  |
| O | 3.930255  | 0.154608  | 3.033205  |
| C | -2.372185 | -1.600965 | 0.499063  |
| O | -2.773327 | -2.206804 | -0.542997 |
| C | 2.328557  | -1.718246 | -0.262759 |
| O | 2.492972  | -2.010610 | 0.961541  |
| C | 2.320495  | 1.664655  | 0.269880  |
| O | 2.561811  | 1.923130  | -0.949783 |
| C | -2.350571 | 1.634566  | -0.468220 |
| O | -2.658390 | 2.256518  | 0.596098  |
| H | 0.564017  | -5.795790 | -0.491457 |
| H | 0.735315  | -4.842199 | -1.826072 |
| H | 1.874346  | -4.803487 | -0.634741 |
| H | -1.188313 | -5.529896 | 0.977207  |
| H | -1.563772 | -4.255773 | 1.955503  |
| H | -2.339037 | -4.437162 | 0.509436  |
| H | 5.814411  | -0.999287 | -1.888219 |
| H | 7.050075  | -0.642827 | -0.830427 |
| H | 6.173251  | -2.027498 | -0.628202 |
| H | 5.662175  | 0.928399  | 2.170930  |
| H | 6.977120  | 0.575486  | 1.211308  |
| H | 6.112402  | 1.955326  | 0.939269  |
| H | 2.124660  | 4.610210  | 0.359254  |
| H | 0.992351  | 5.735654  | -0.054765 |
| H | 0.927526  | 5.001464  | 1.421734  |
| H | -2.153147 | 4.385786  | -1.179611 |
| H | -0.992038 | 5.554197  | -1.219716 |
| H | -1.022310 | 4.381750  | -2.379459 |
| H | -5.748248 | 0.694562  | -2.077339 |
| H | -7.021650 | 0.386750  | -1.055134 |
| H | -6.237314 | 1.839157  | -0.975054 |
| H | -5.643782 | -0.602676 | 2.314646  |
| H | -6.962375 | -0.264404 | 1.362388  |
| H | -6.207102 | -1.728155 | 1.229773  |
| N | -1.445525 | -4.545104 | 0.986930  |
| N | 0.876300  | -4.883548 | -0.818408 |
| N | 6.123908  | -1.054001 | -0.916565 |
| N | 6.045436  | 0.982381  | 1.225746  |
| N | -1.173251 | 4.566999  | -1.389822 |
| N | 1.139726  | 4.856532  | 0.436288  |
| N | -6.116191 | 0.842955  | -1.137317 |
| N | -6.061431 | -0.735322 | 1.393318  |

---
